# Supplementary material for: Regioselective differentiation of vicinal methylene C–H bonds enabled by silver-catalysed nitrene transfer
Source: Royal Society of Chemistry journal article supplement (doi:10.1039/c9cc04006d), 2019-01-01

## Regioselective differentiation of vicinal methylene C-H bonds enabled by silver-catalysed nitrene transfer

Ryan J. Scamp,<sup>a</sup> Bradley Scheffer,<sup>b</sup> and Jennifer M. Schomaker<sup>b,\*</sup>

*<sup>a</sup>Department of Chemistry, Yale University, 275 Prospect St.*

*New Haven, CT, 06511*

*<sup>b</sup>Department of Chemistry, University of Wisconsin, 1101 University Avenue*

*Madison, Wisconsin, 53706-1396*

|                                |             |
|--------------------------------|-------------|
| <b>Table of Contents .....</b> | <b>S2-1</b> |
|--------------------------------|-------------|

|                                                                |             |
|----------------------------------------------------------------|-------------|
| <b>I. NMR Data of New Compounds and Reaction Products.....</b> | <b>S2-2</b> |
|----------------------------------------------------------------|-------------|

## I. NMR Data of New Compounds and Reaction Products

### Arene 5-P

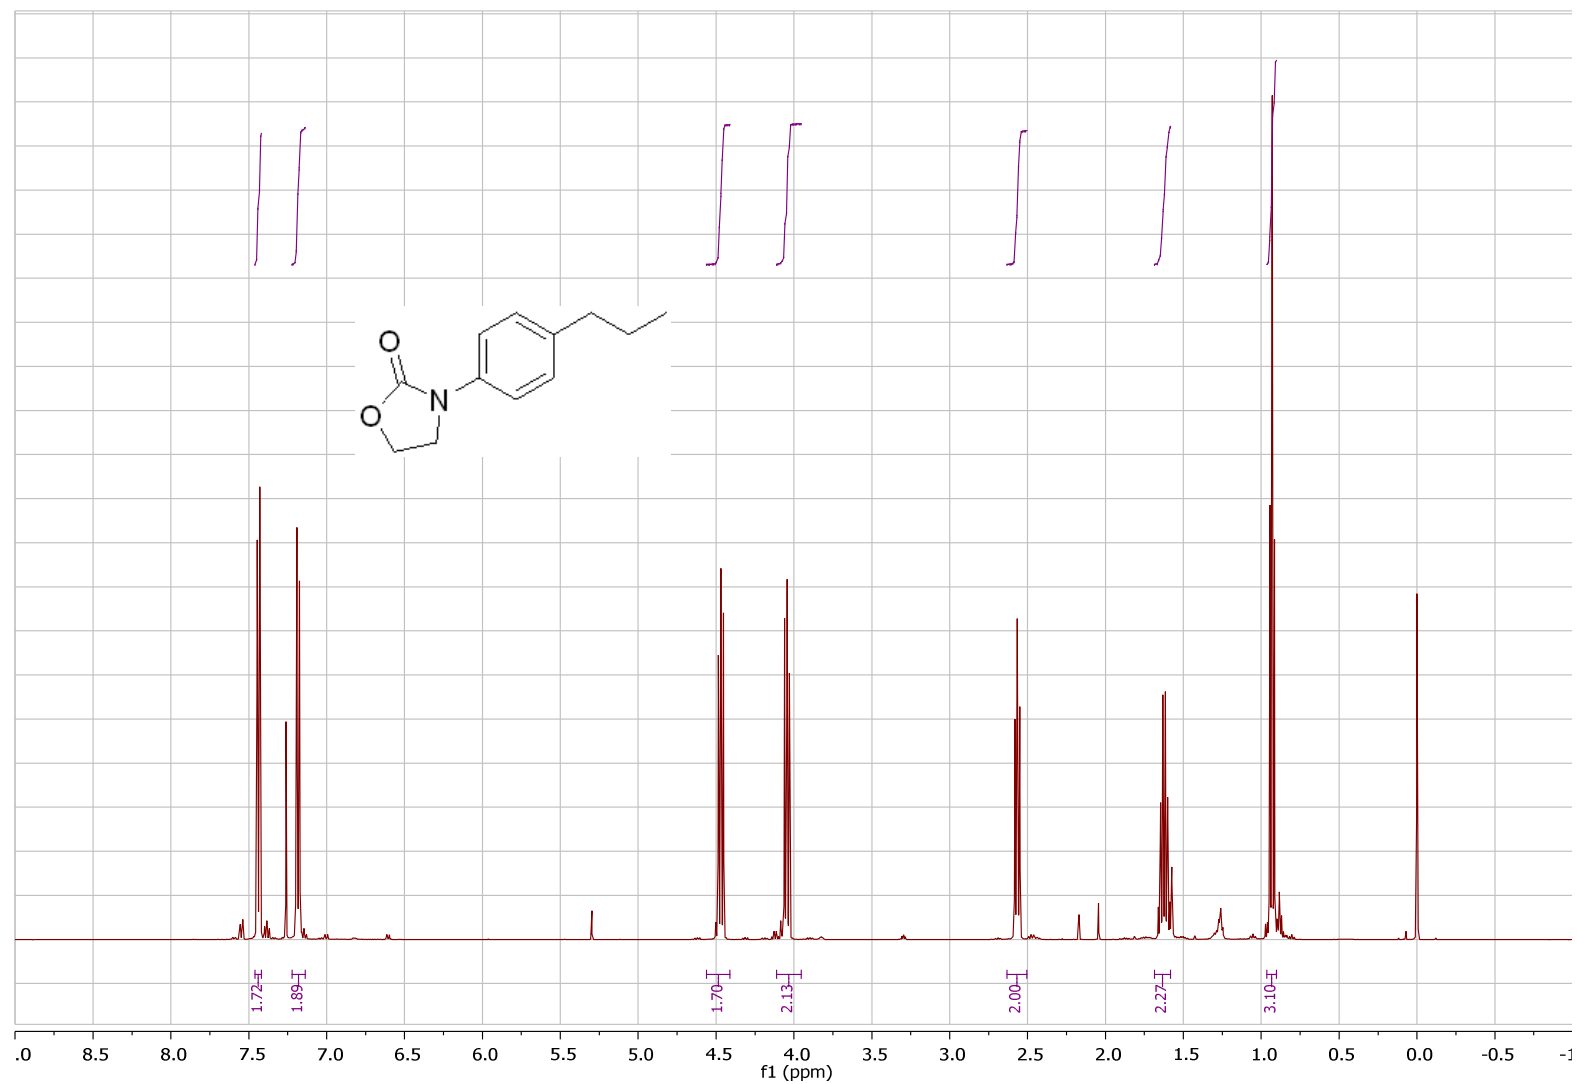

# Arene 5-P

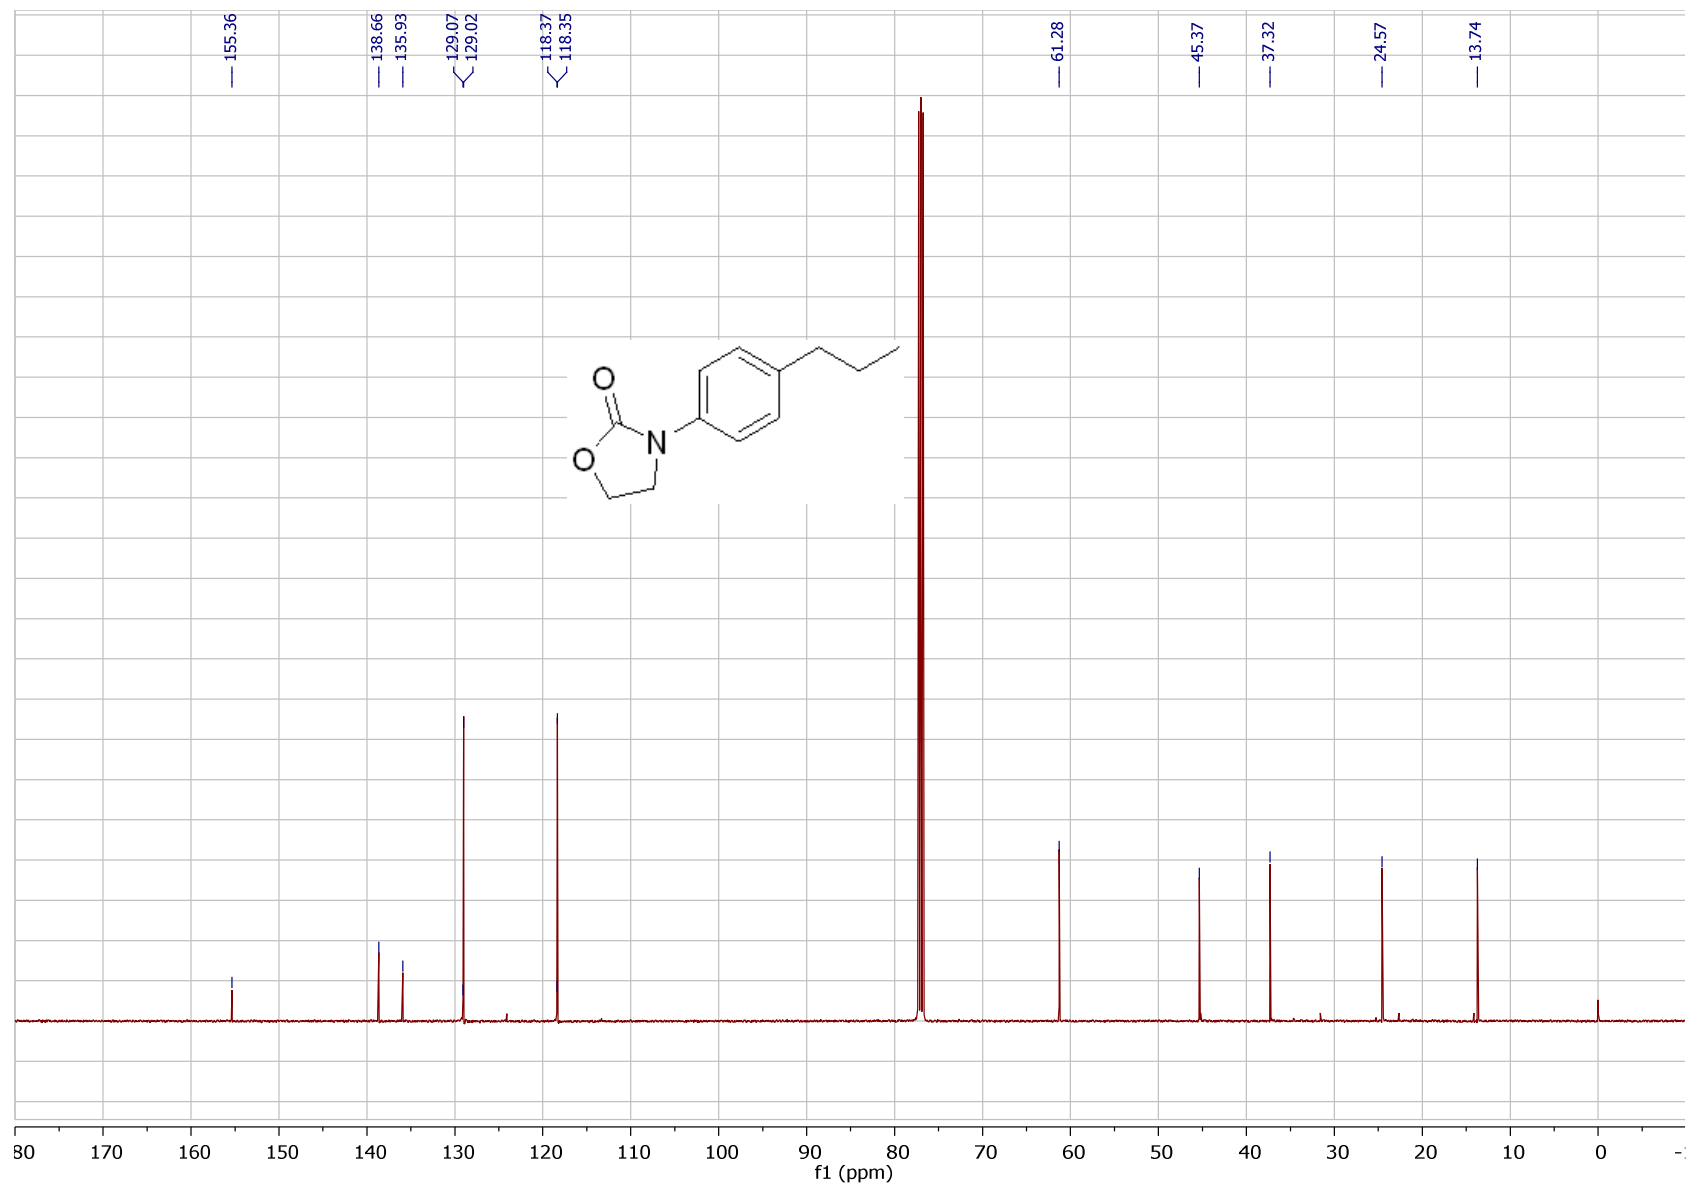

# Arene 7-P

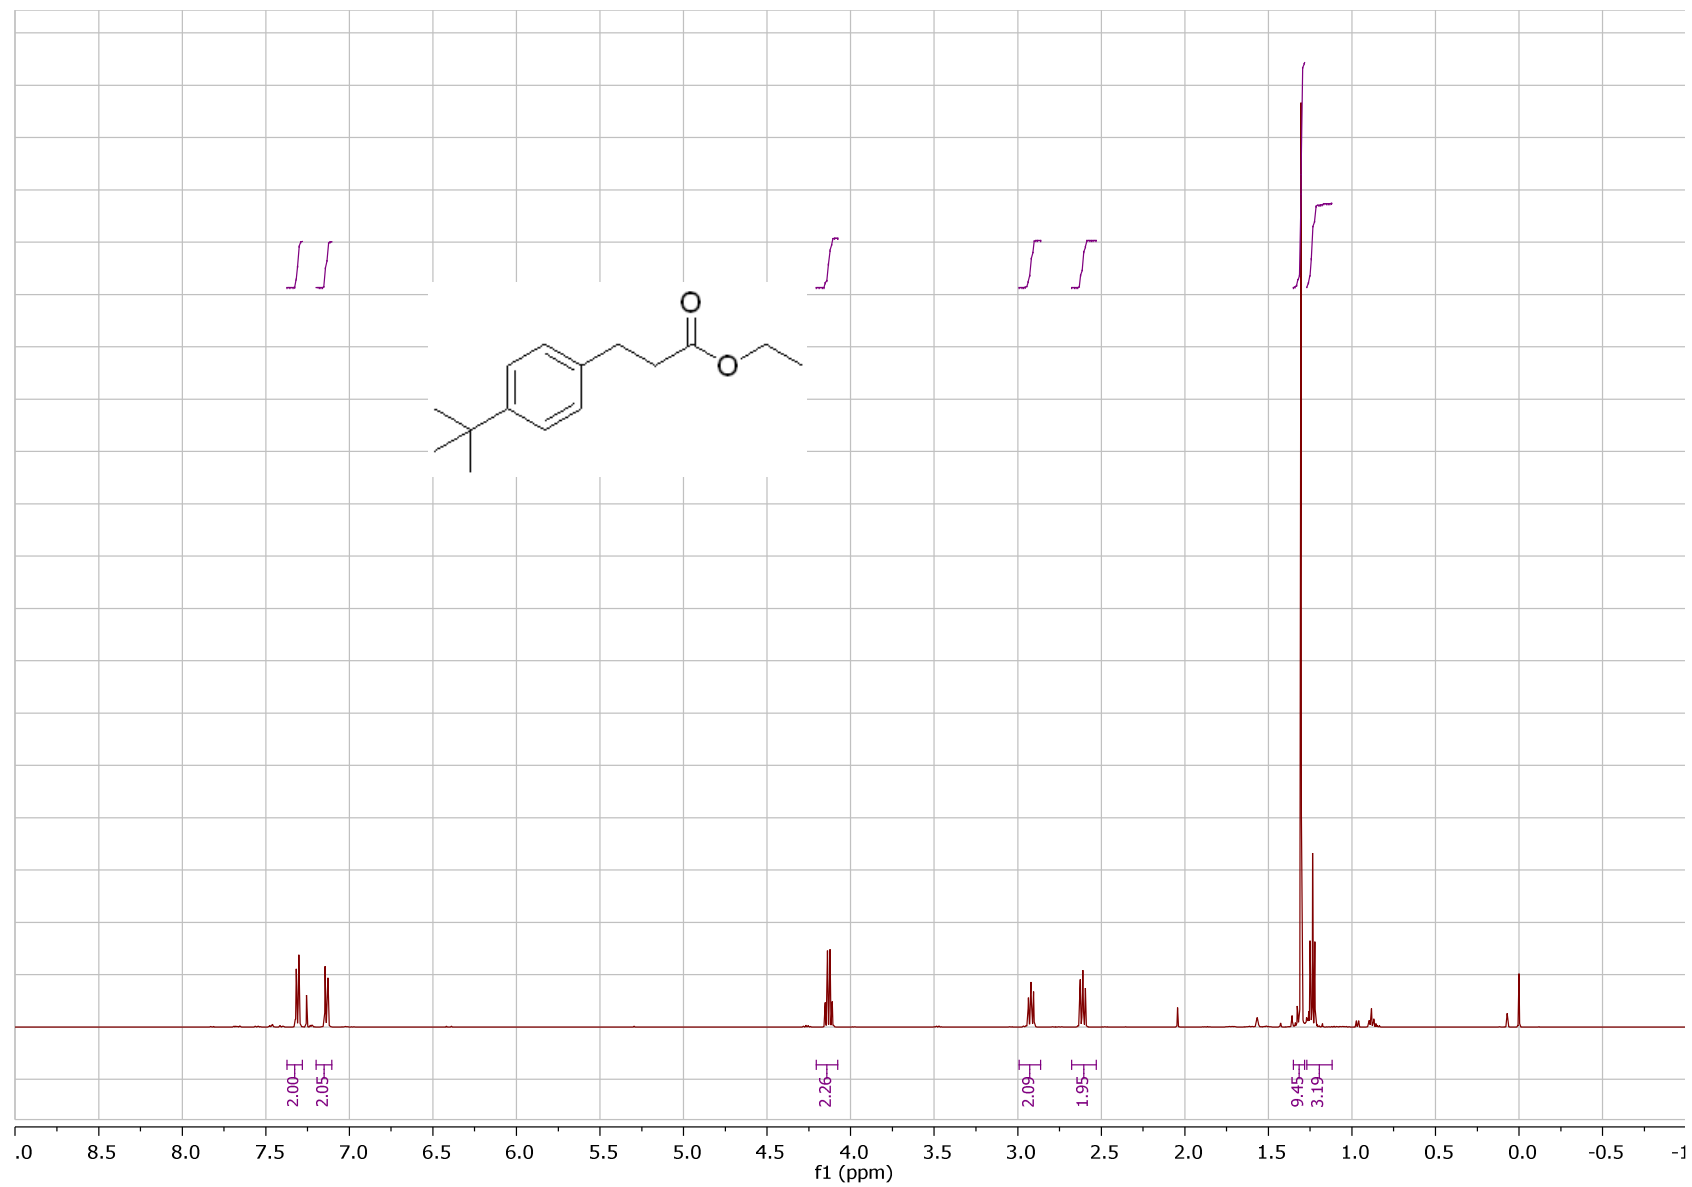

S2-4

# Arene 7-P

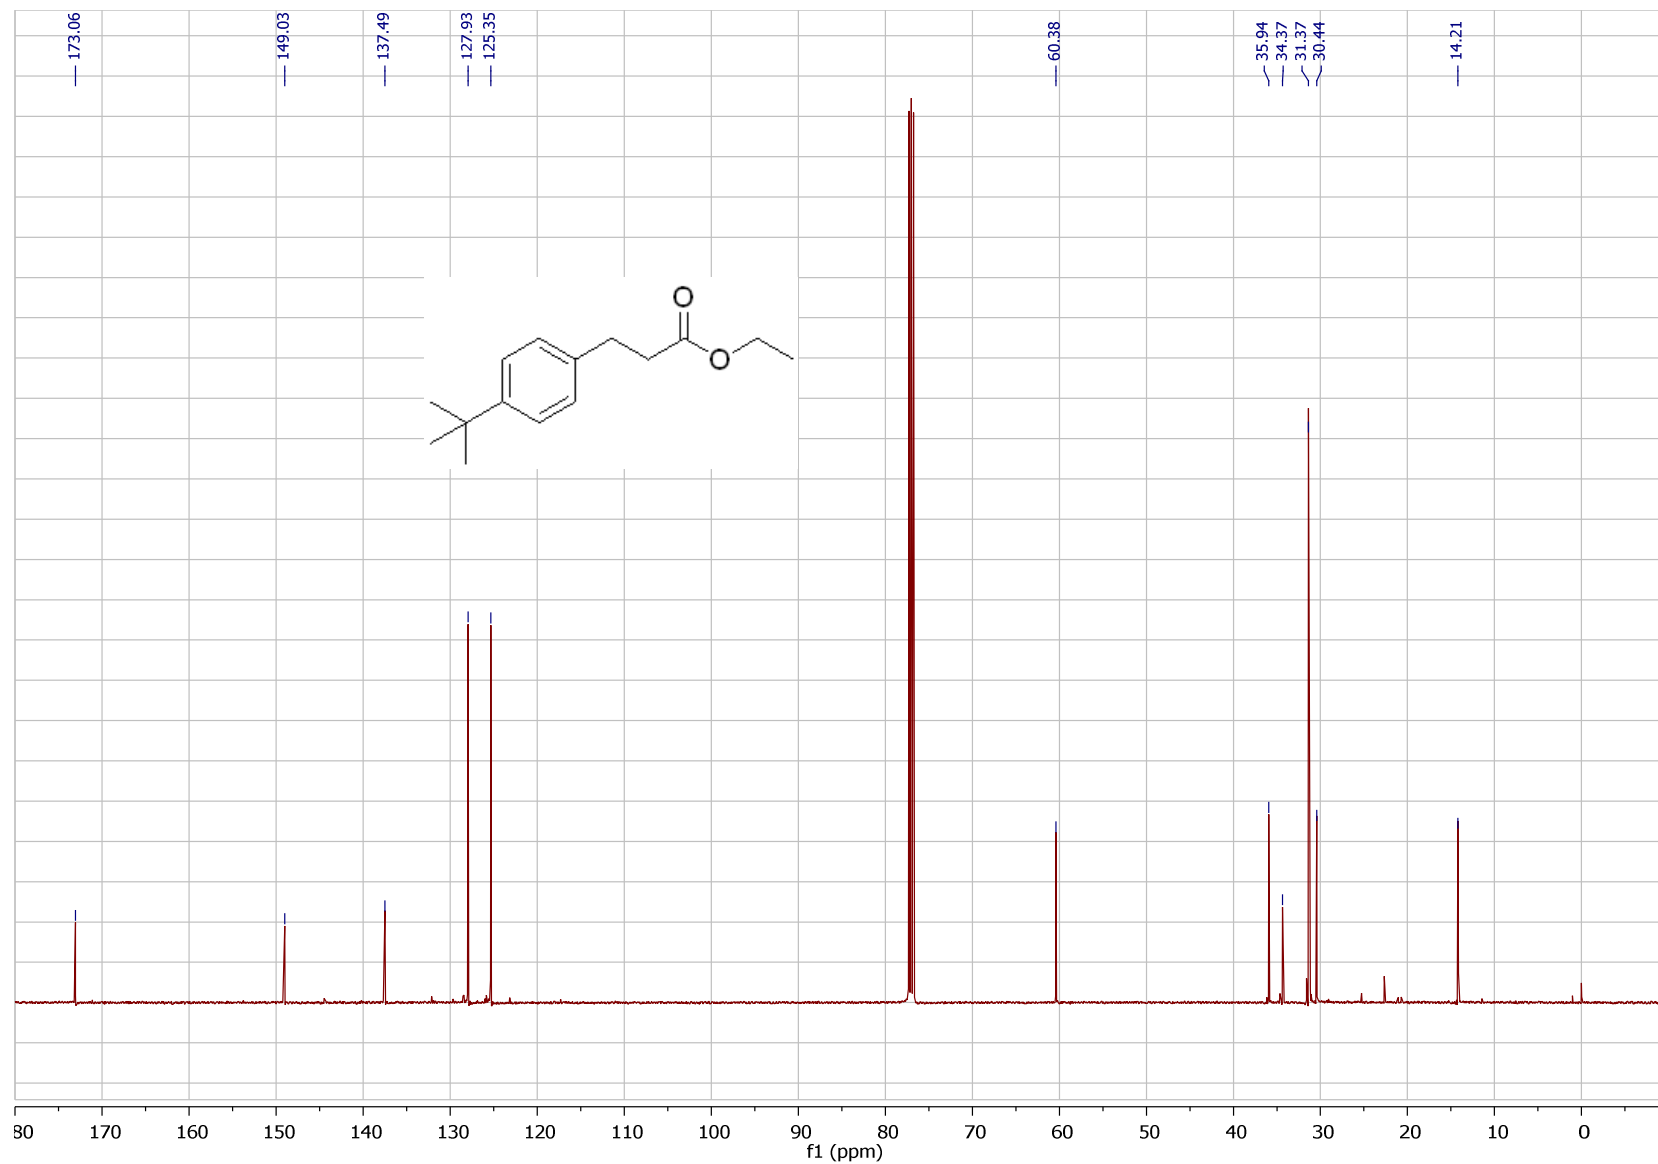

**Arene 9-P**

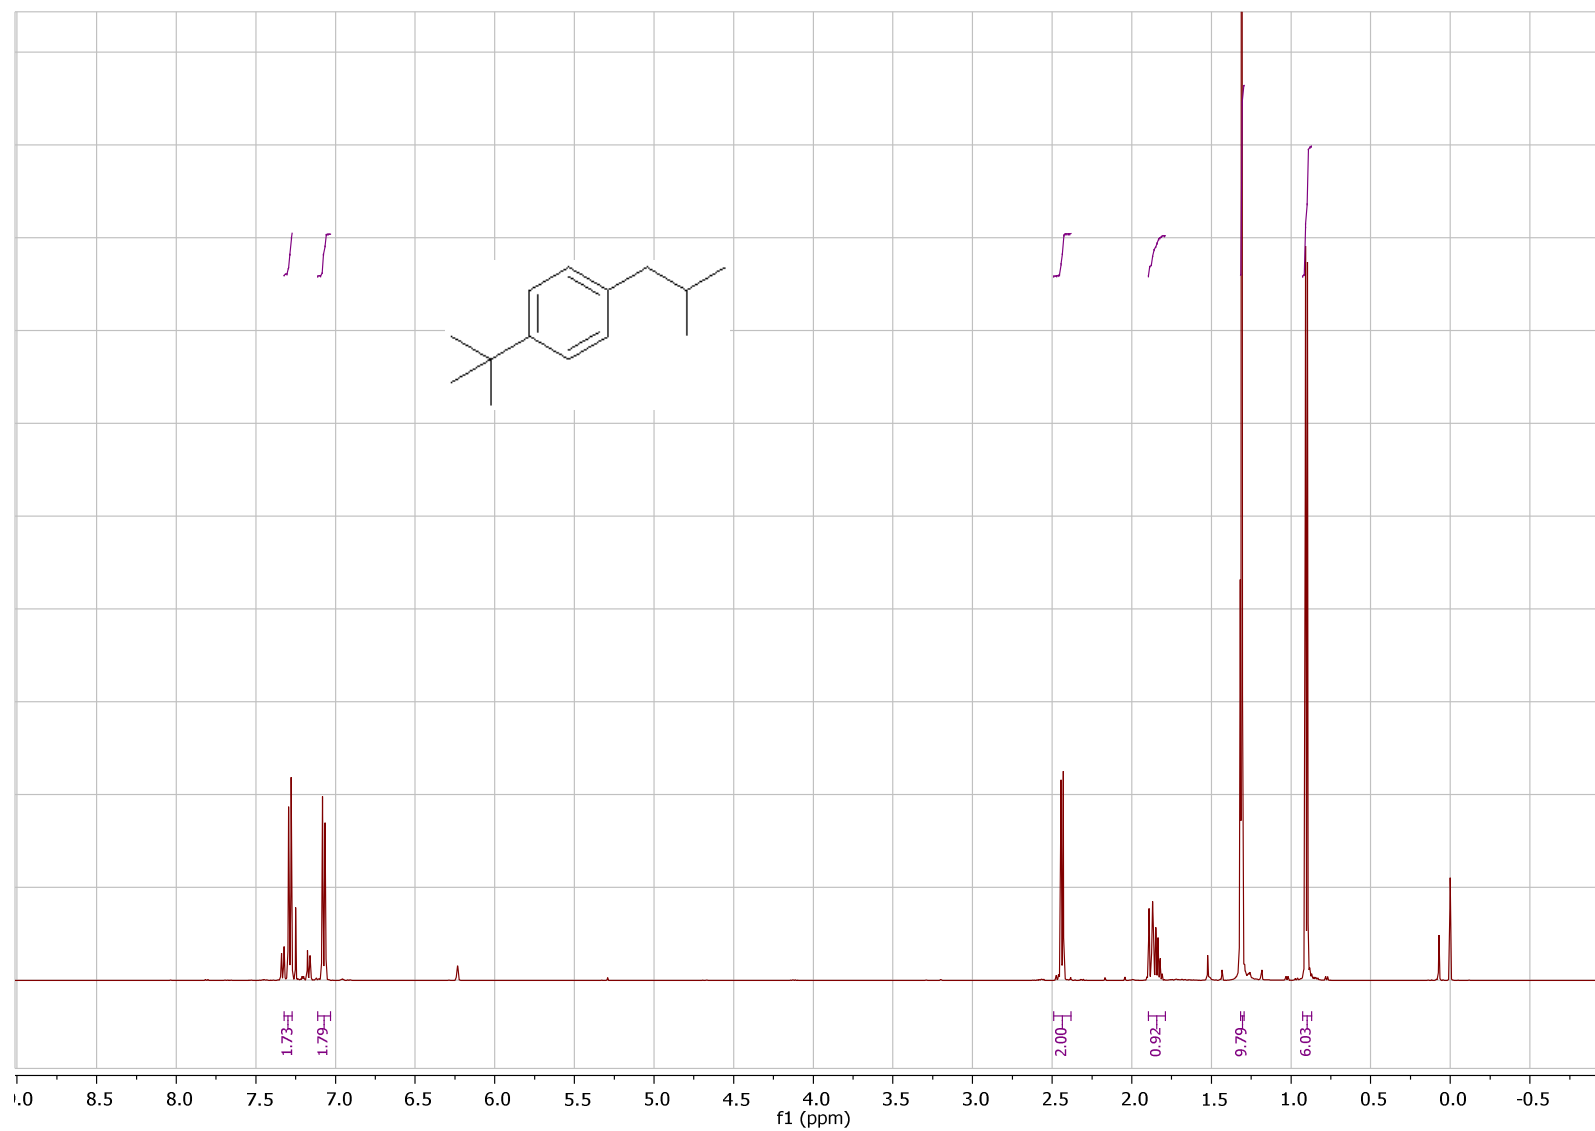

# Arene 9-P

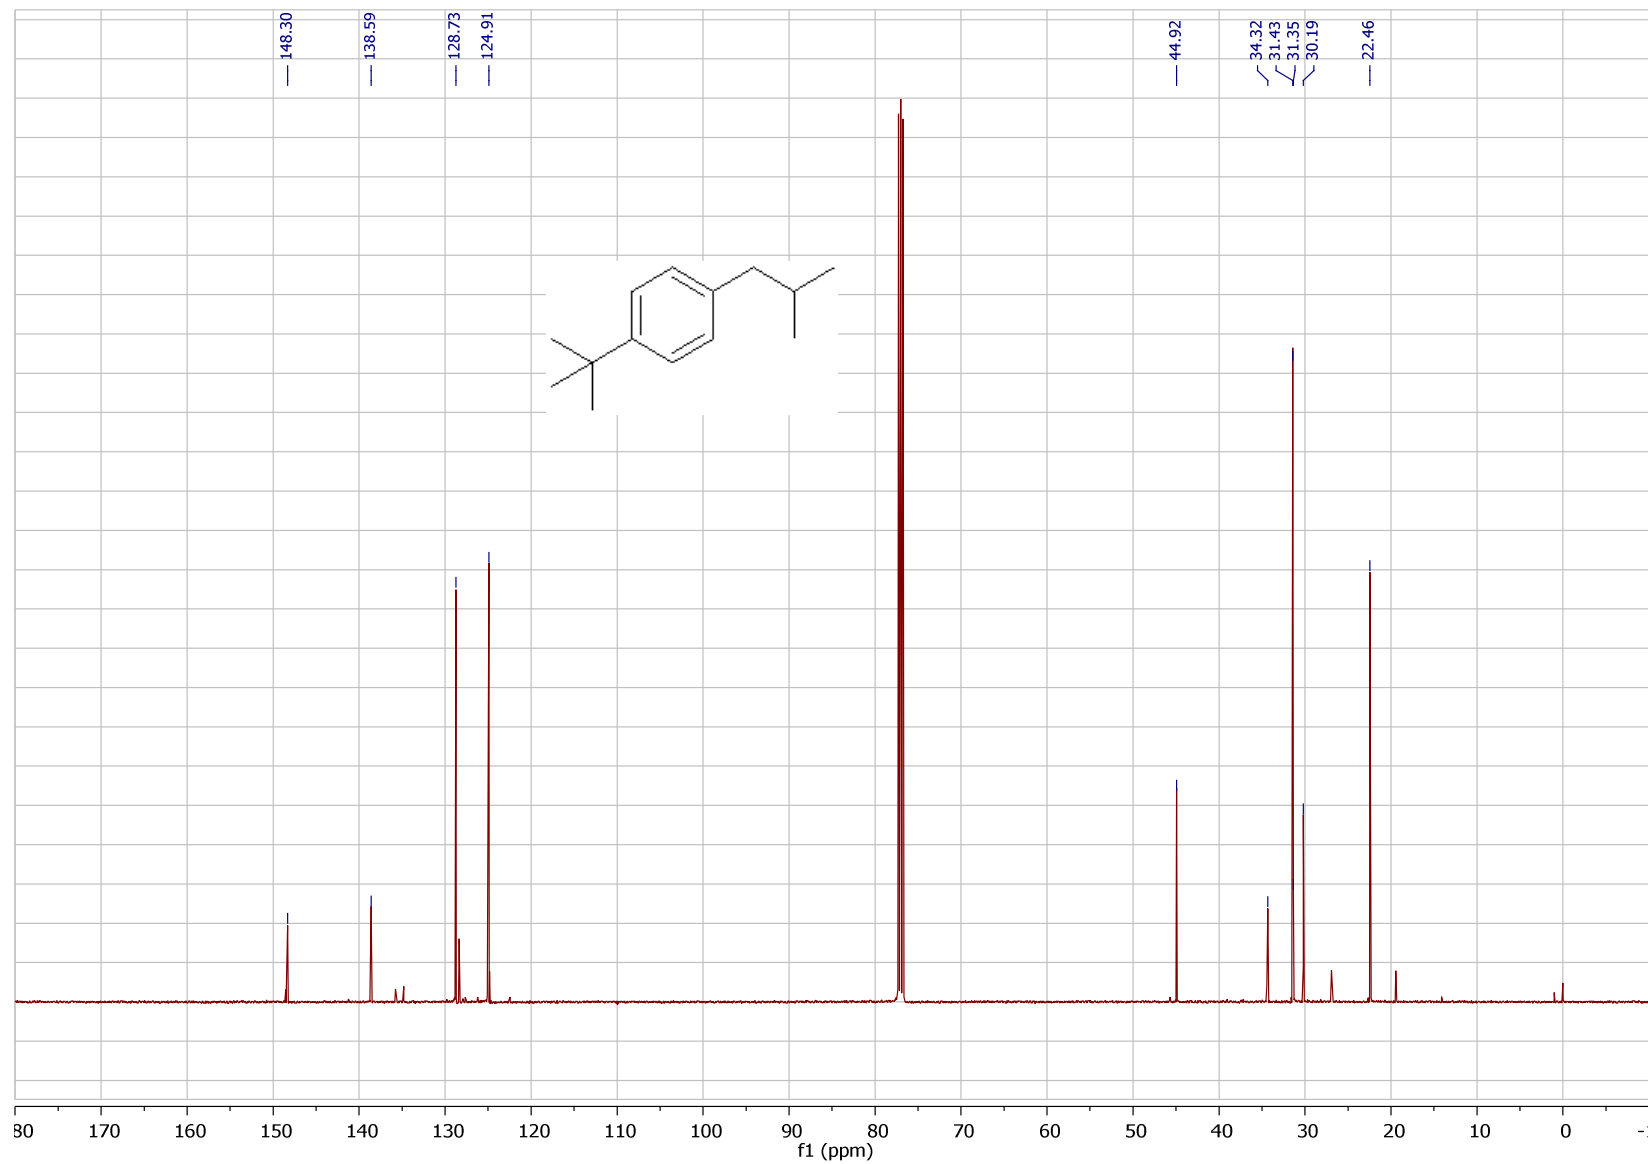

**Arene 10-P**

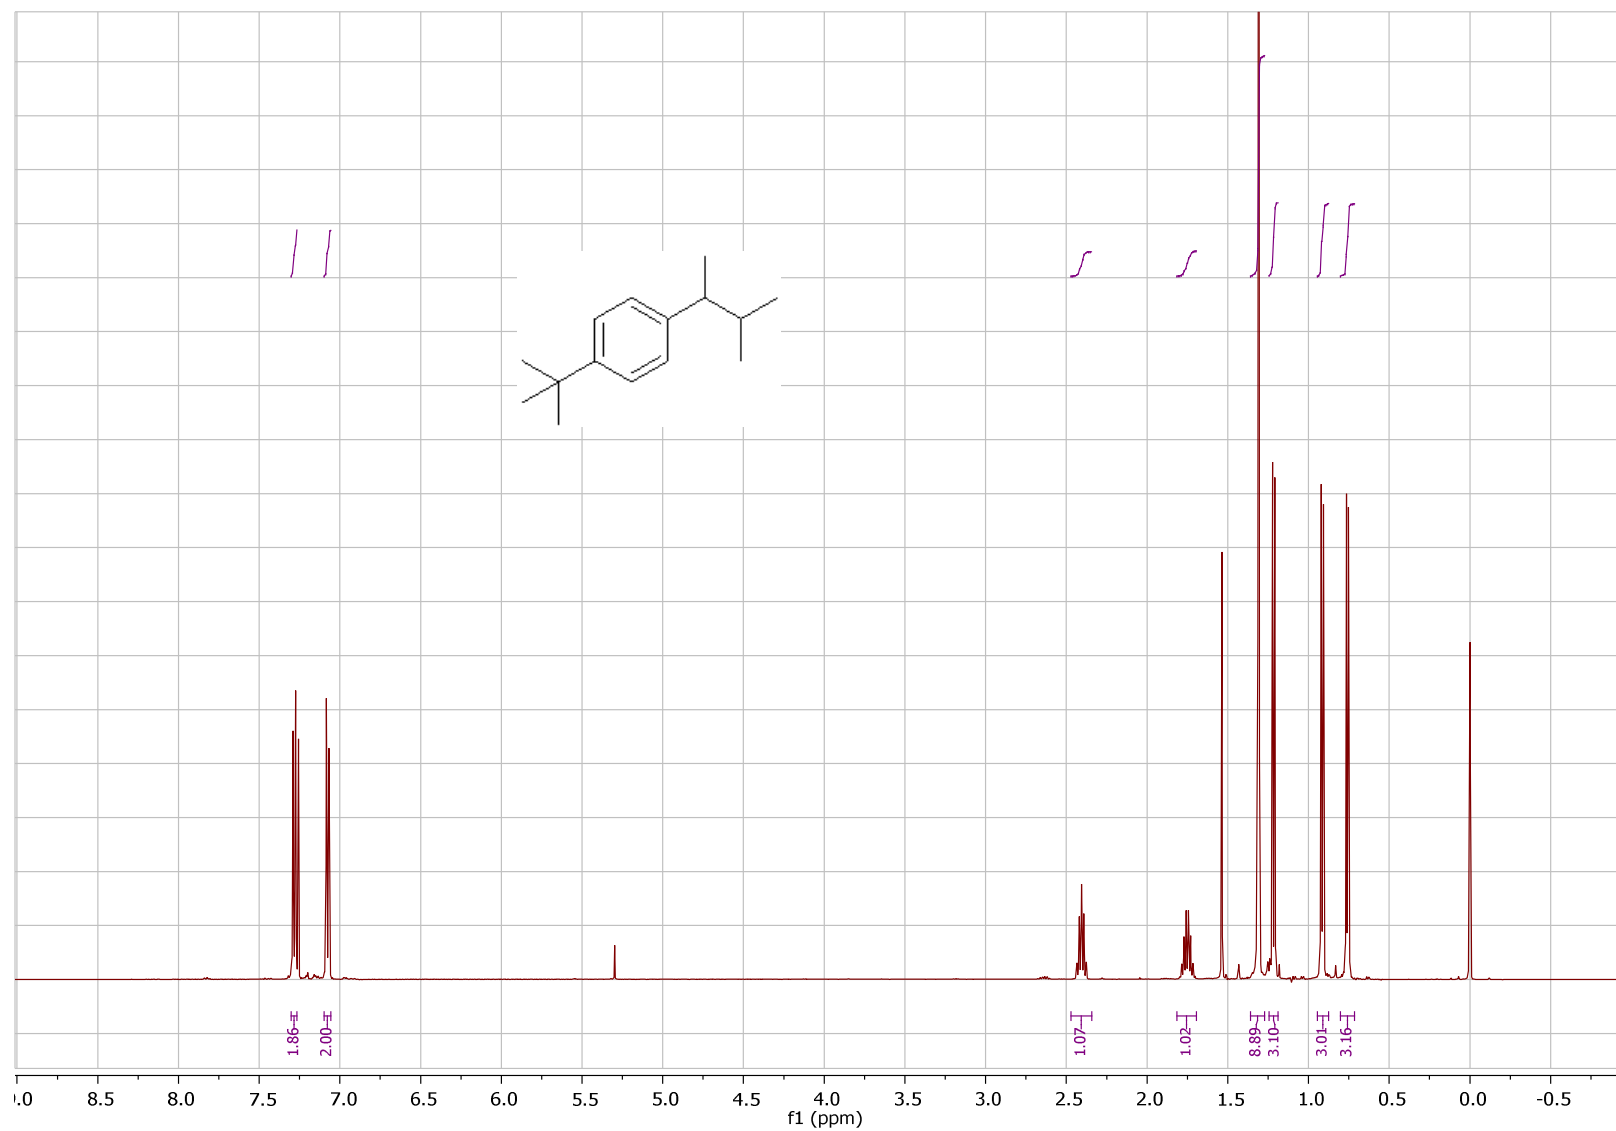

# Arene 10-P

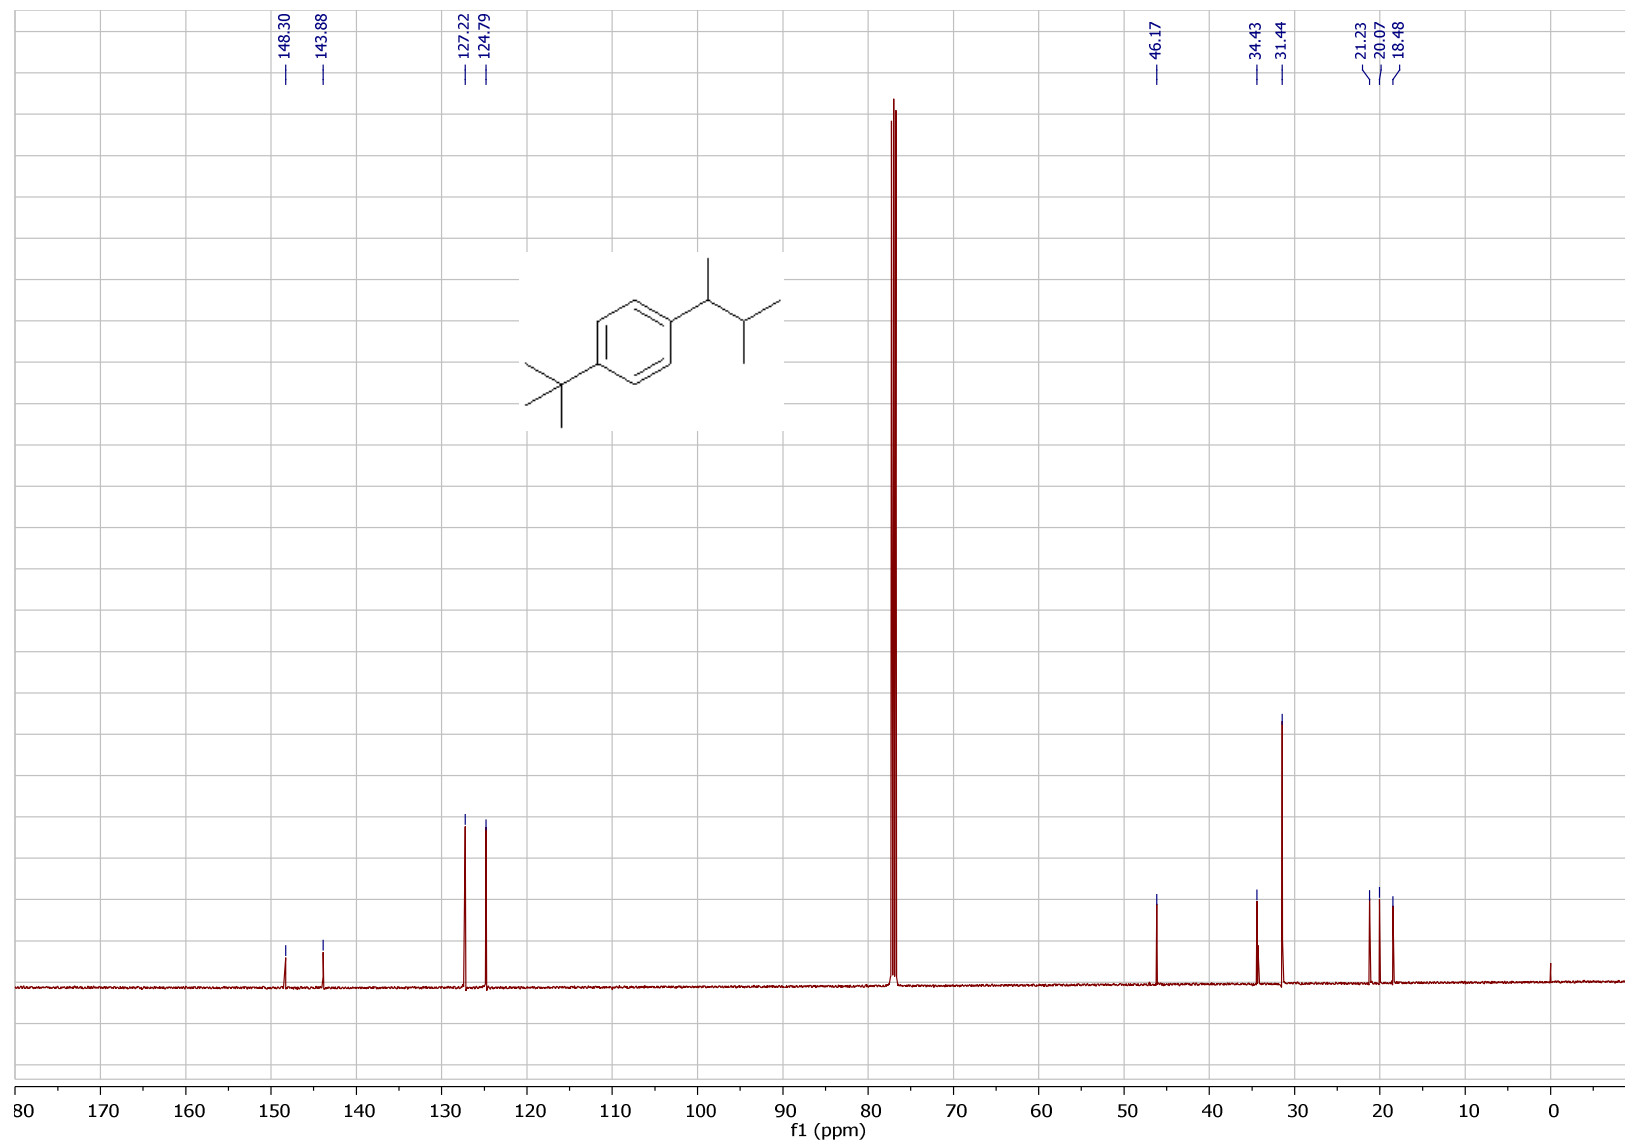

**Arene 11-P**

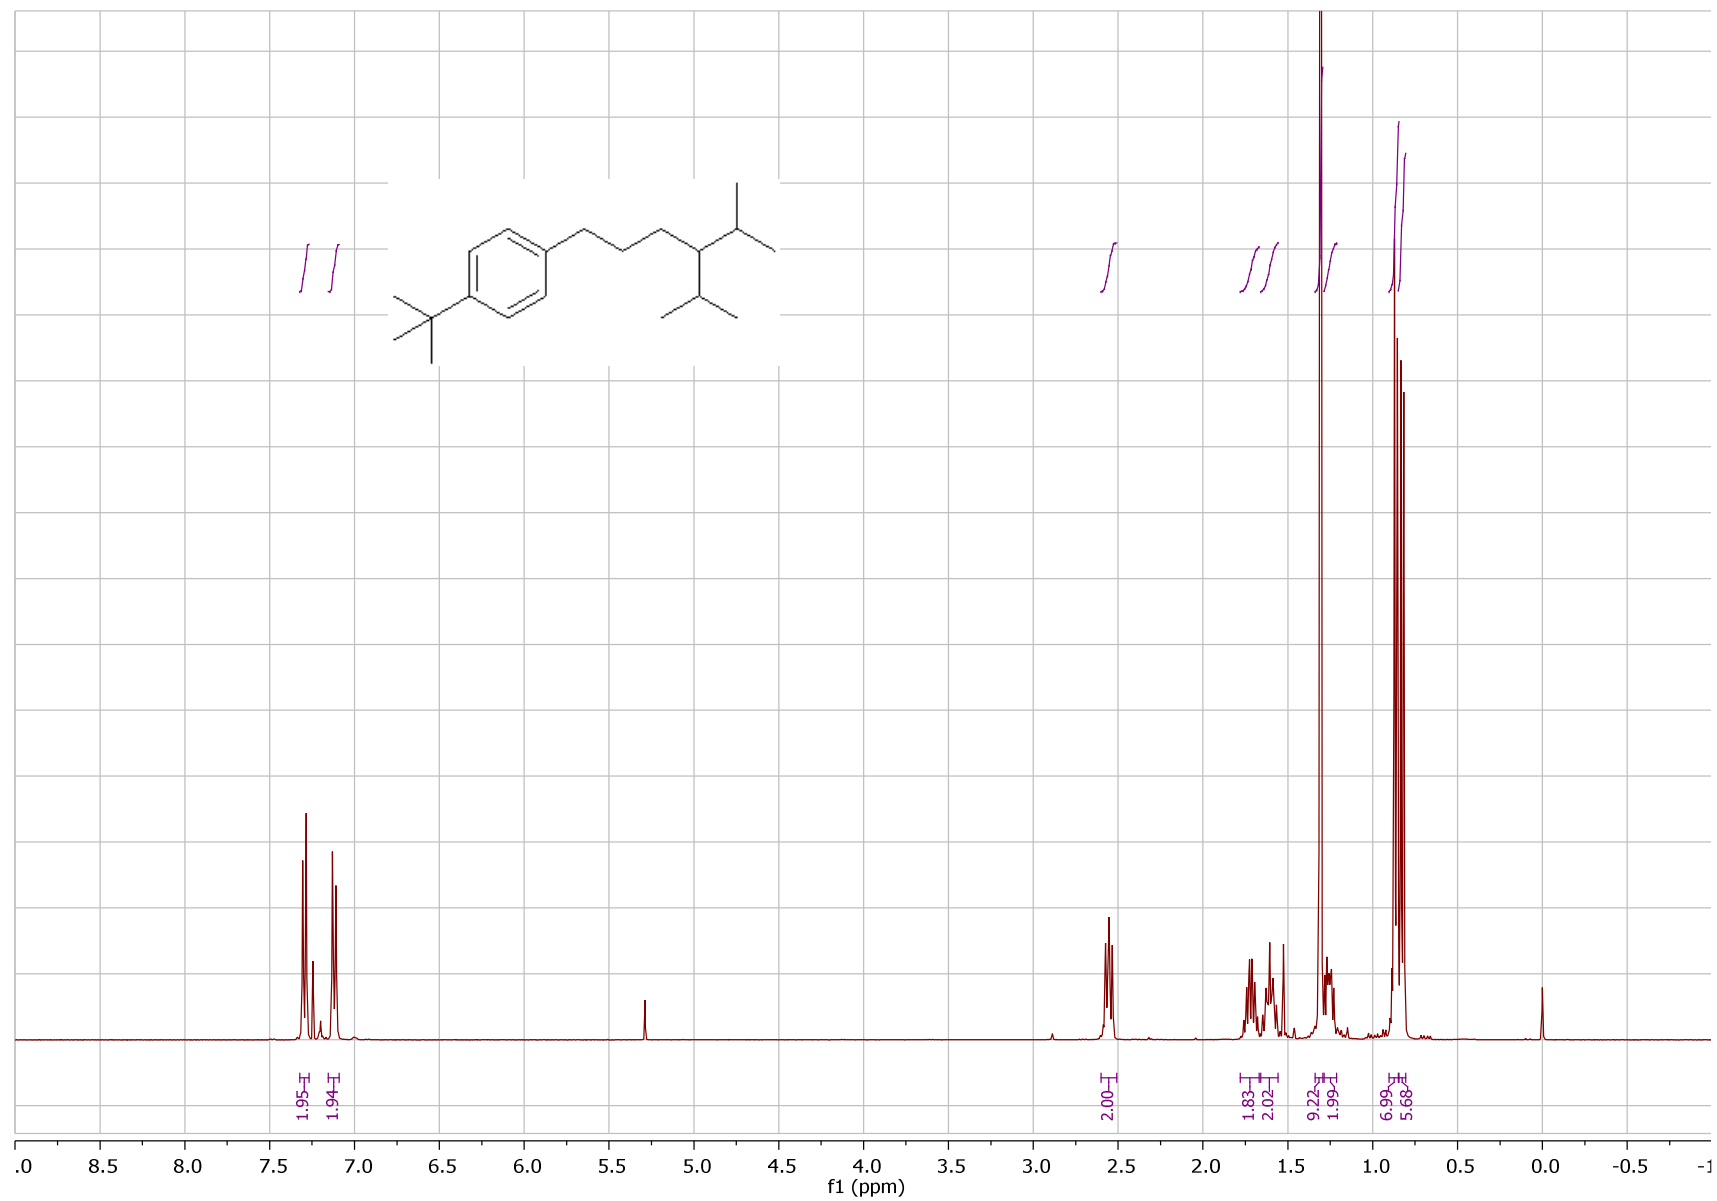

# Arene 11-P

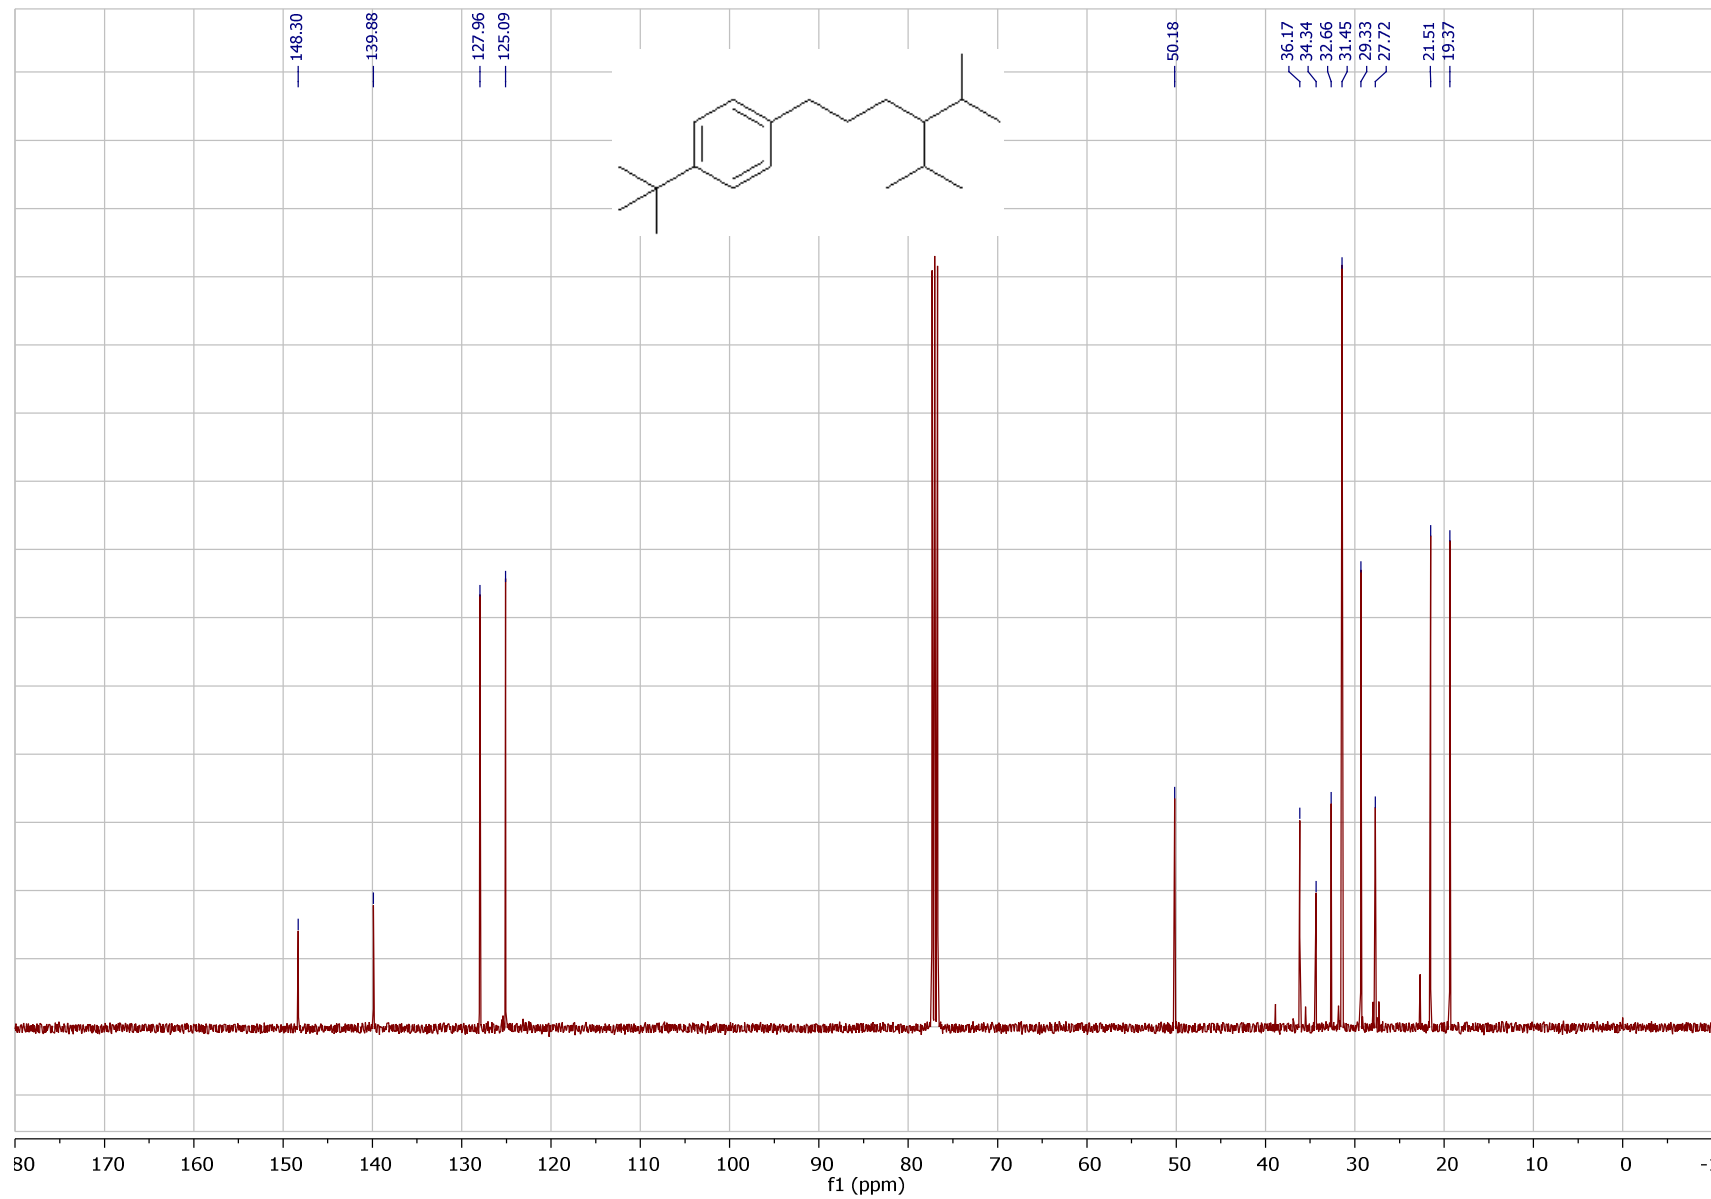

# Arene 13-P

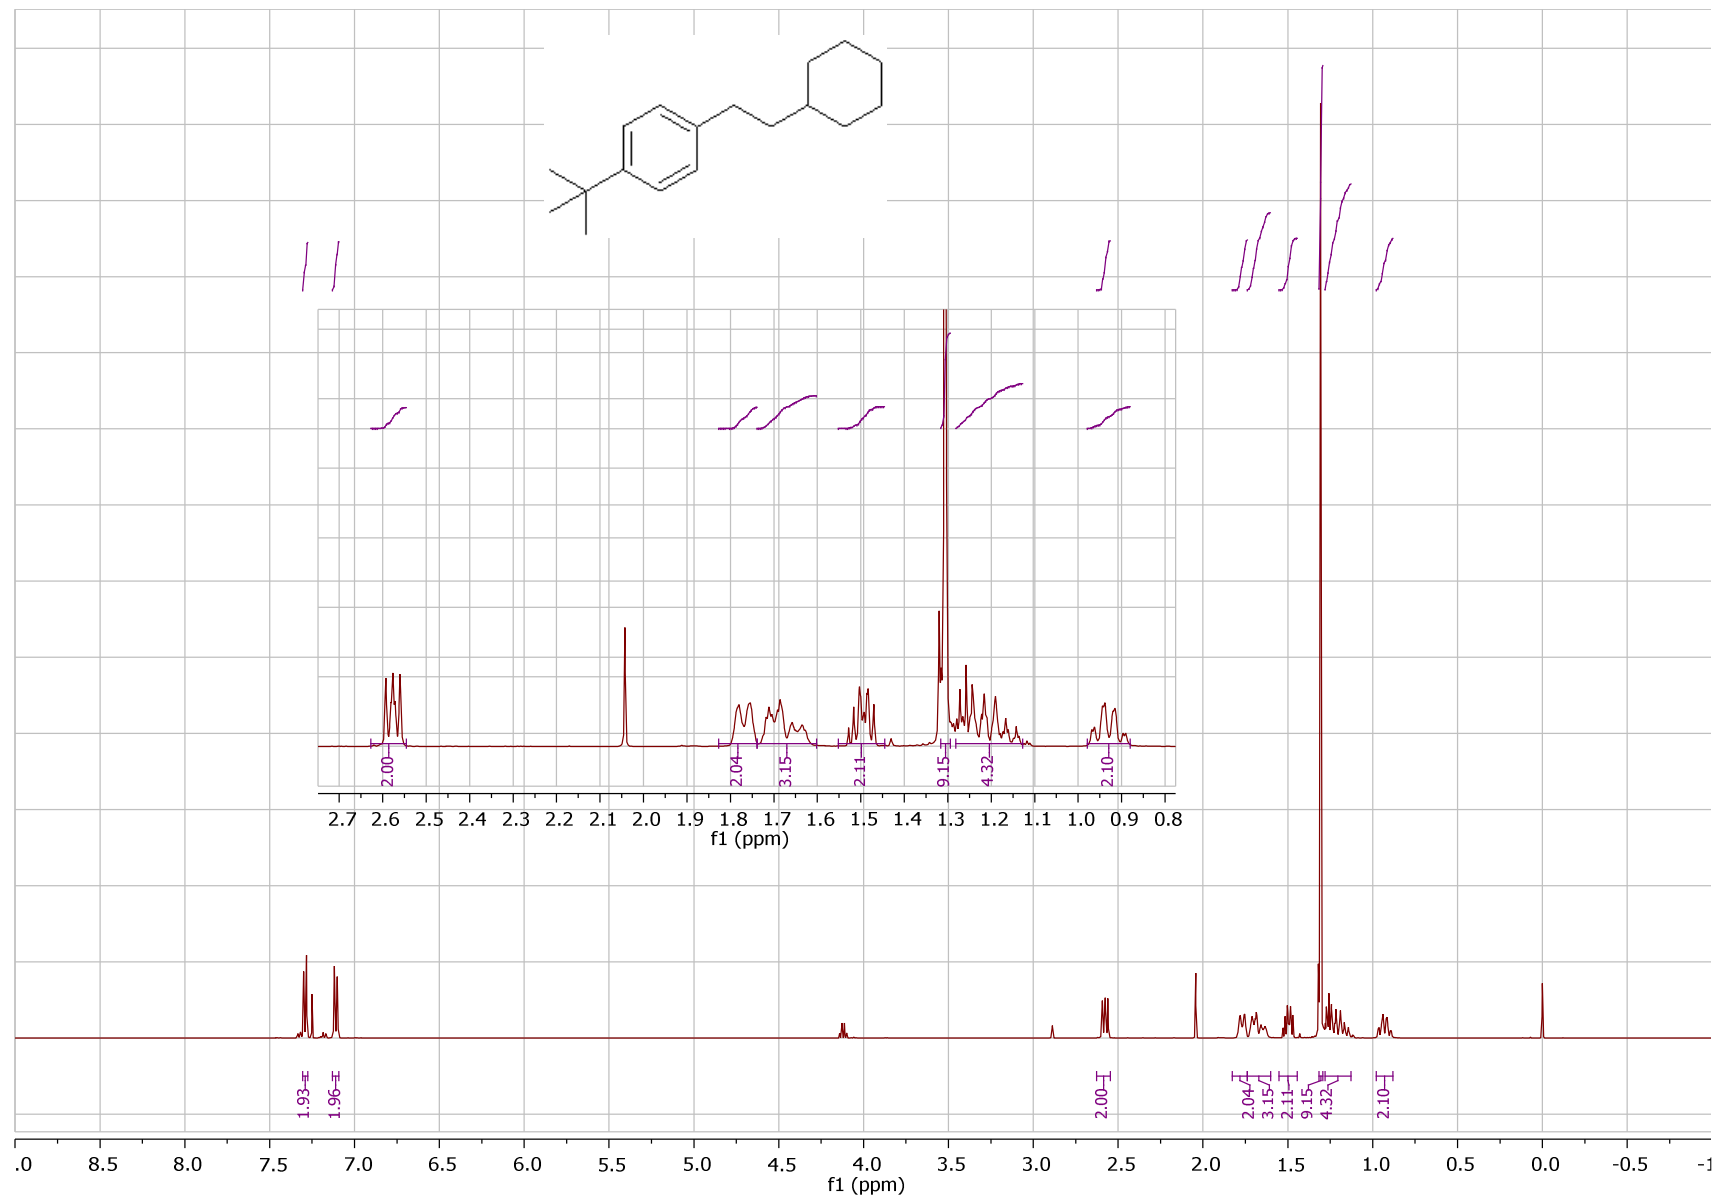

# Arene 13-P

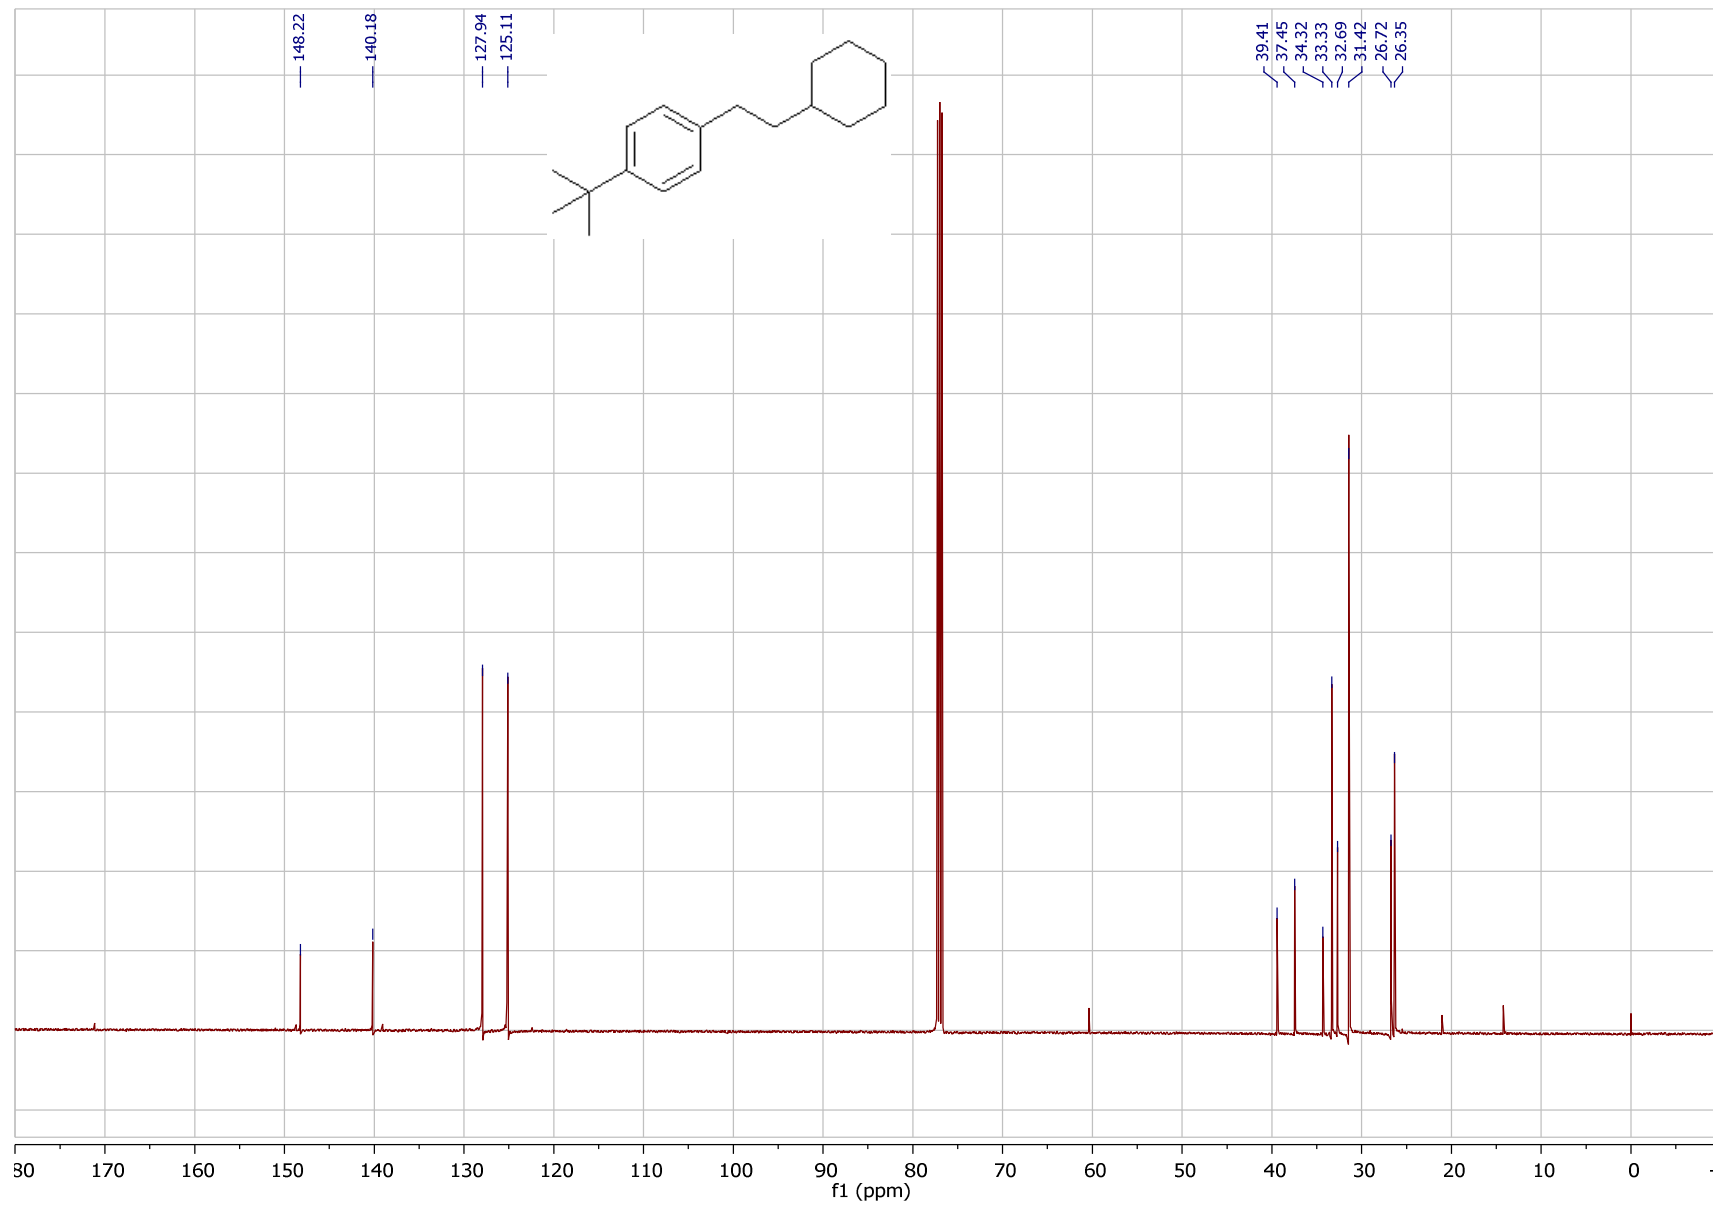

S2-13

**Arene 14-P**

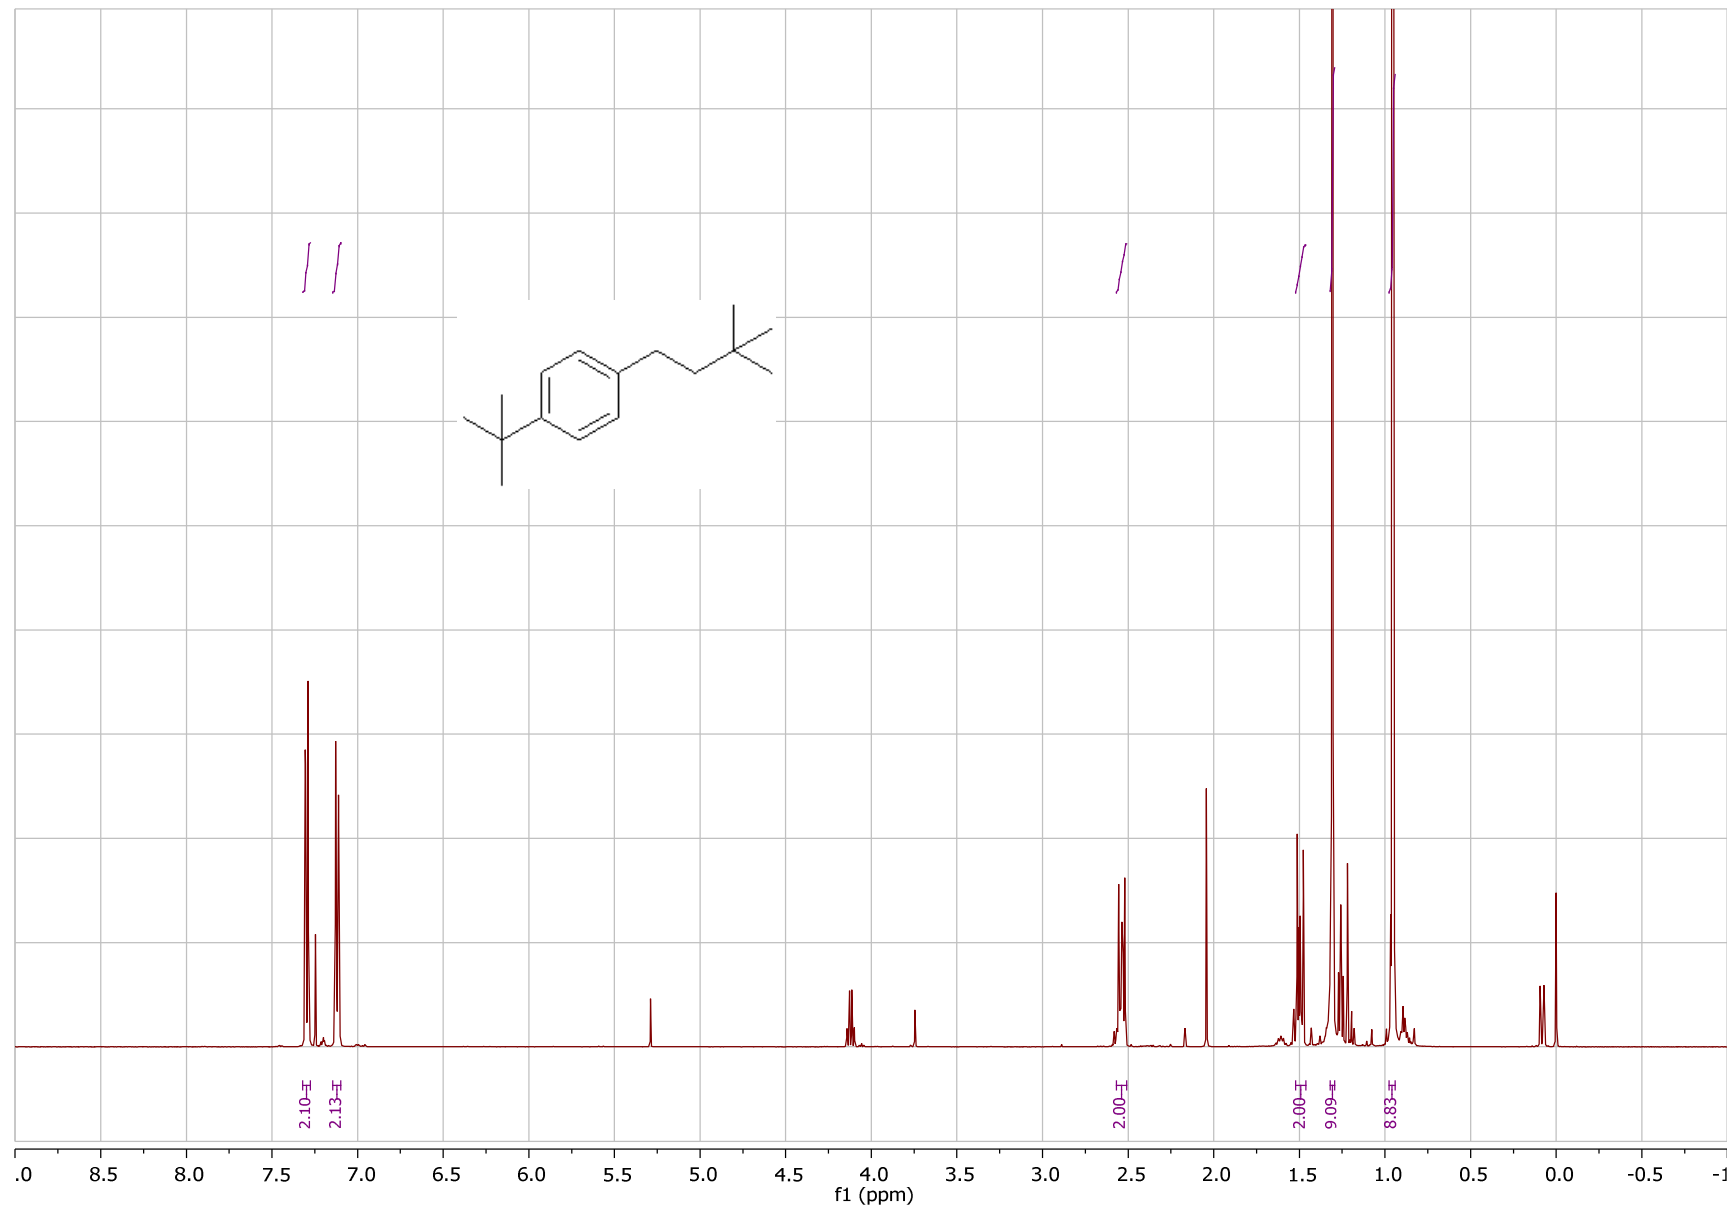

S2-14

# Arene 14-P

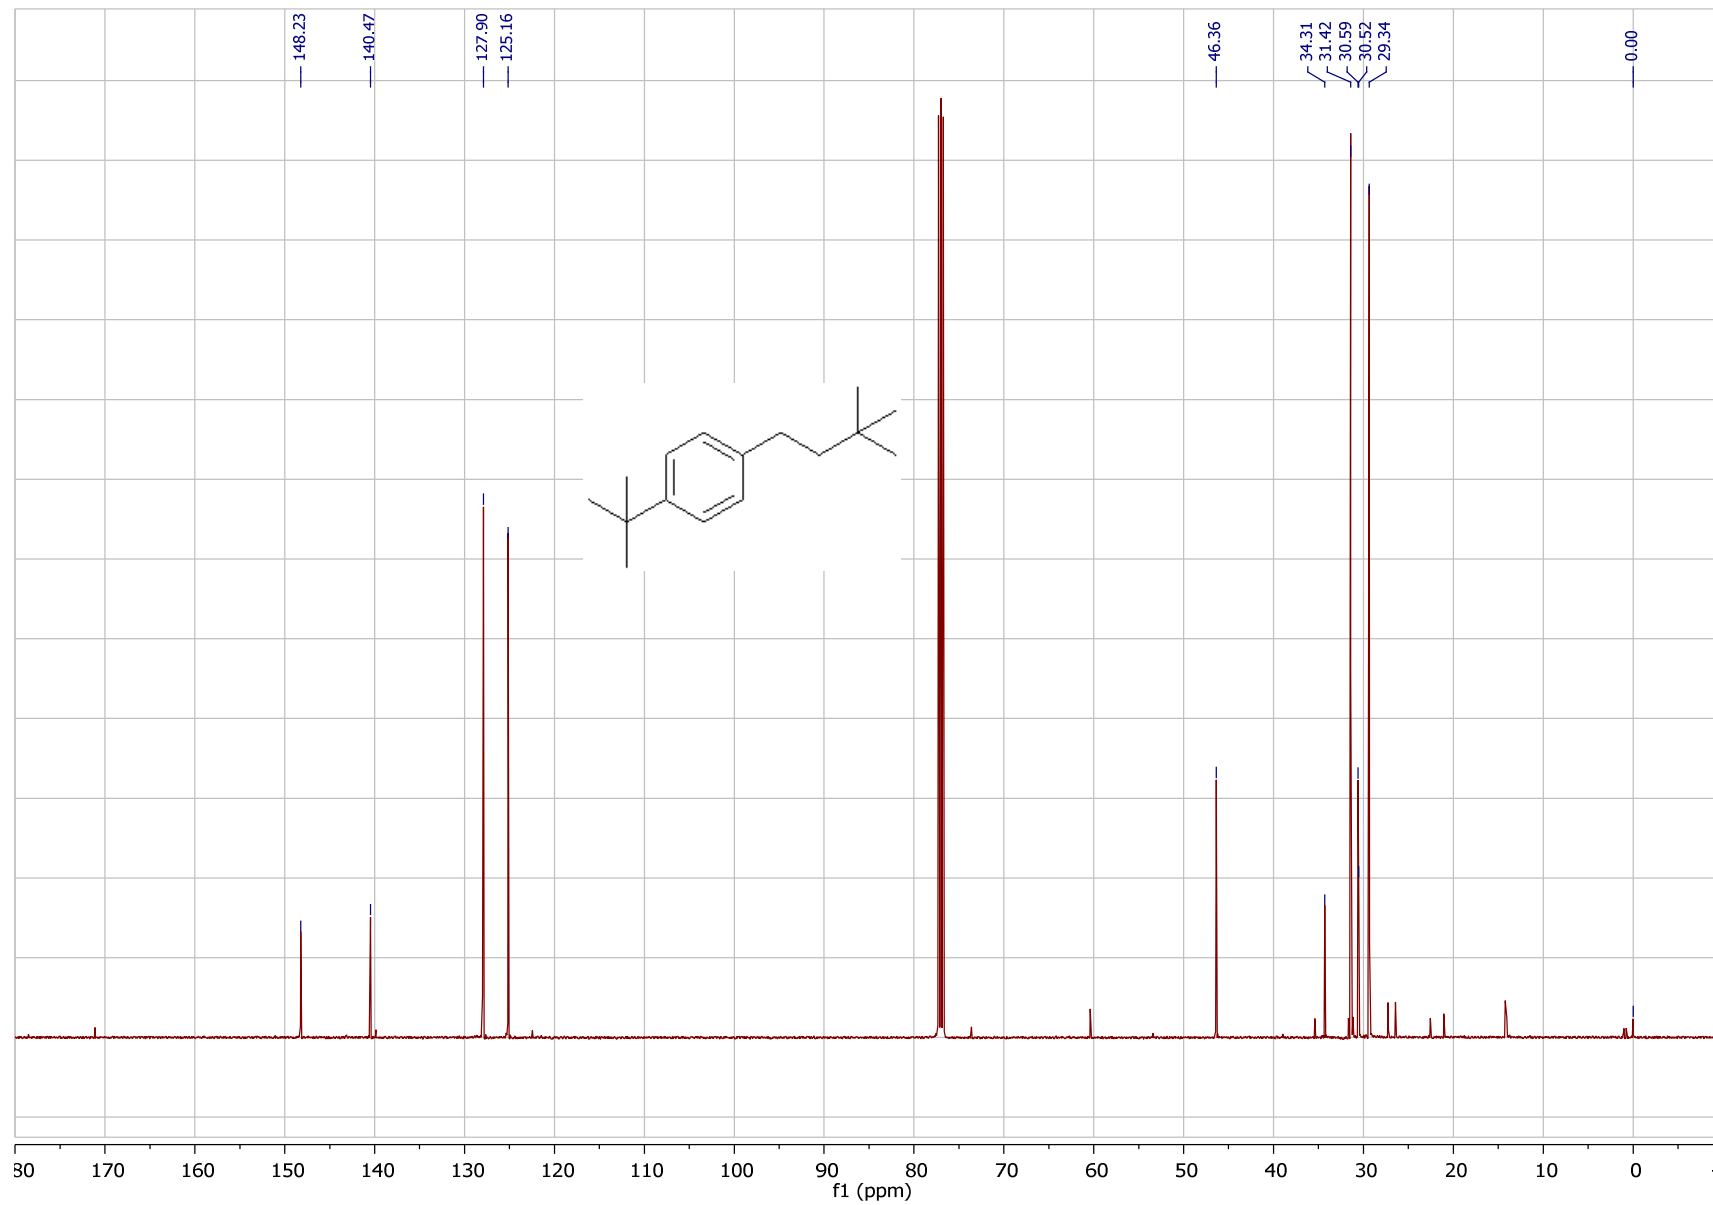

**Arene 15-P**

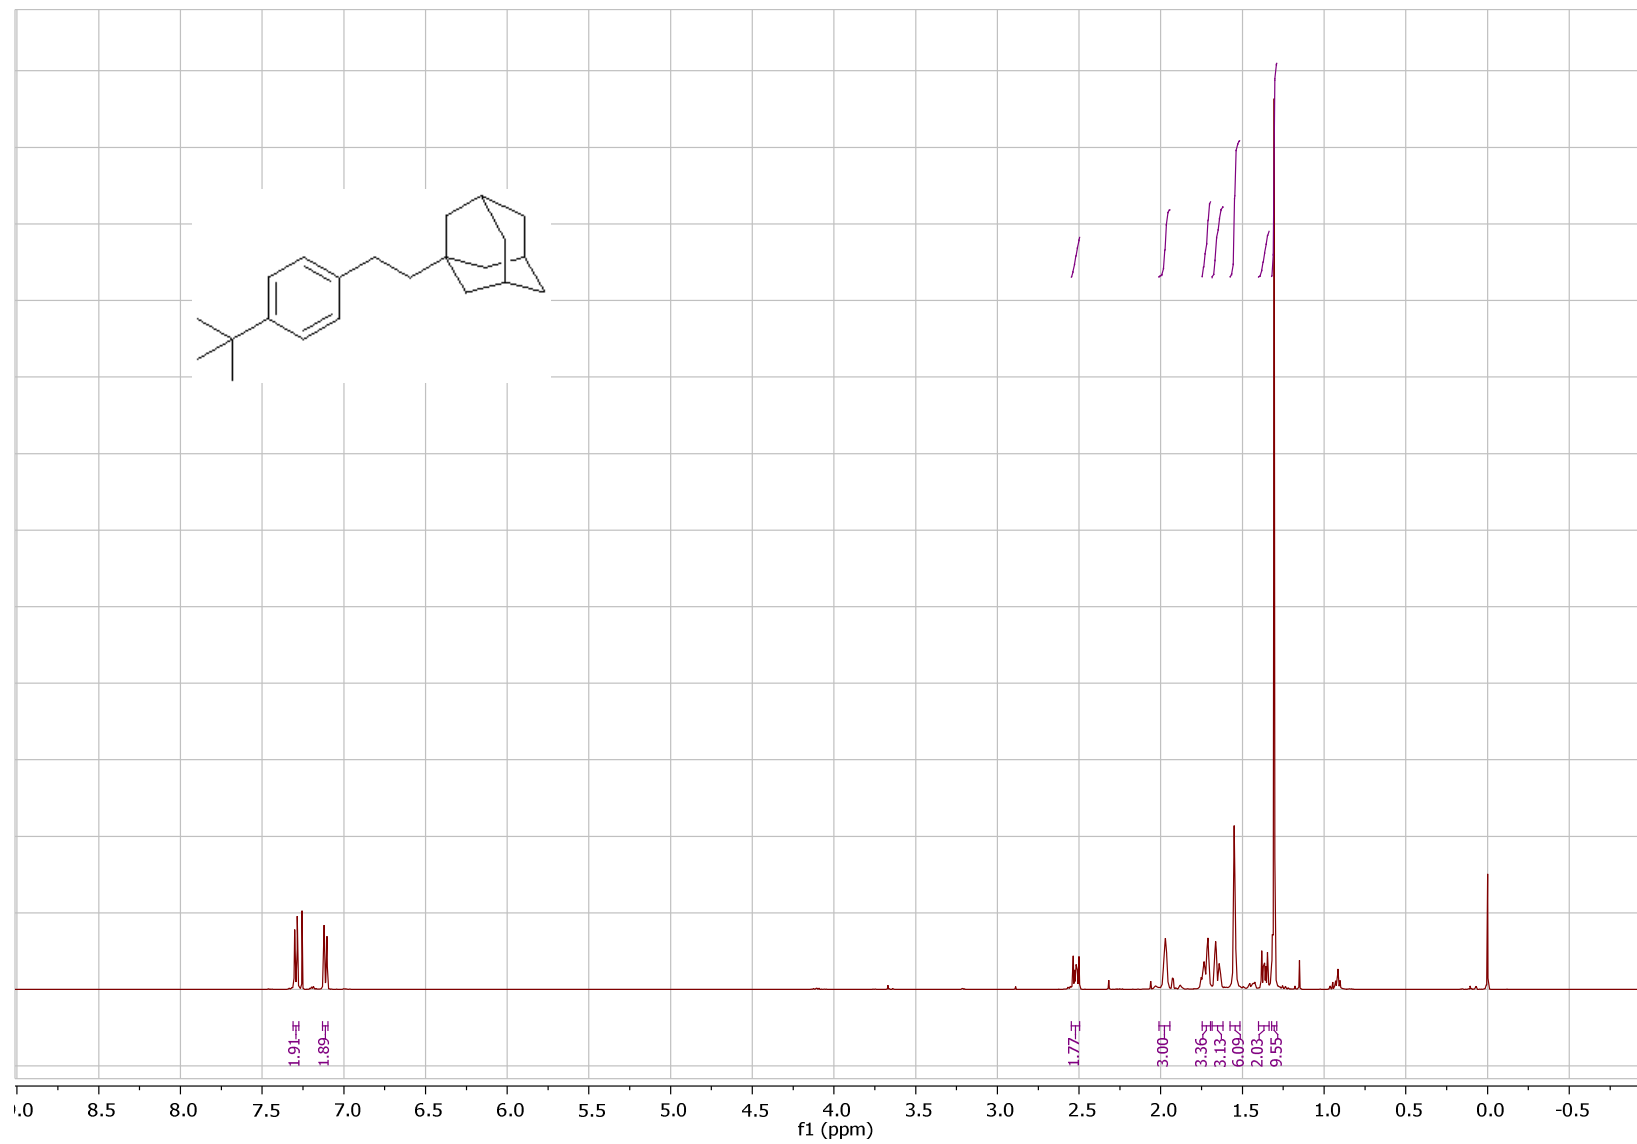

# Arene 15-P

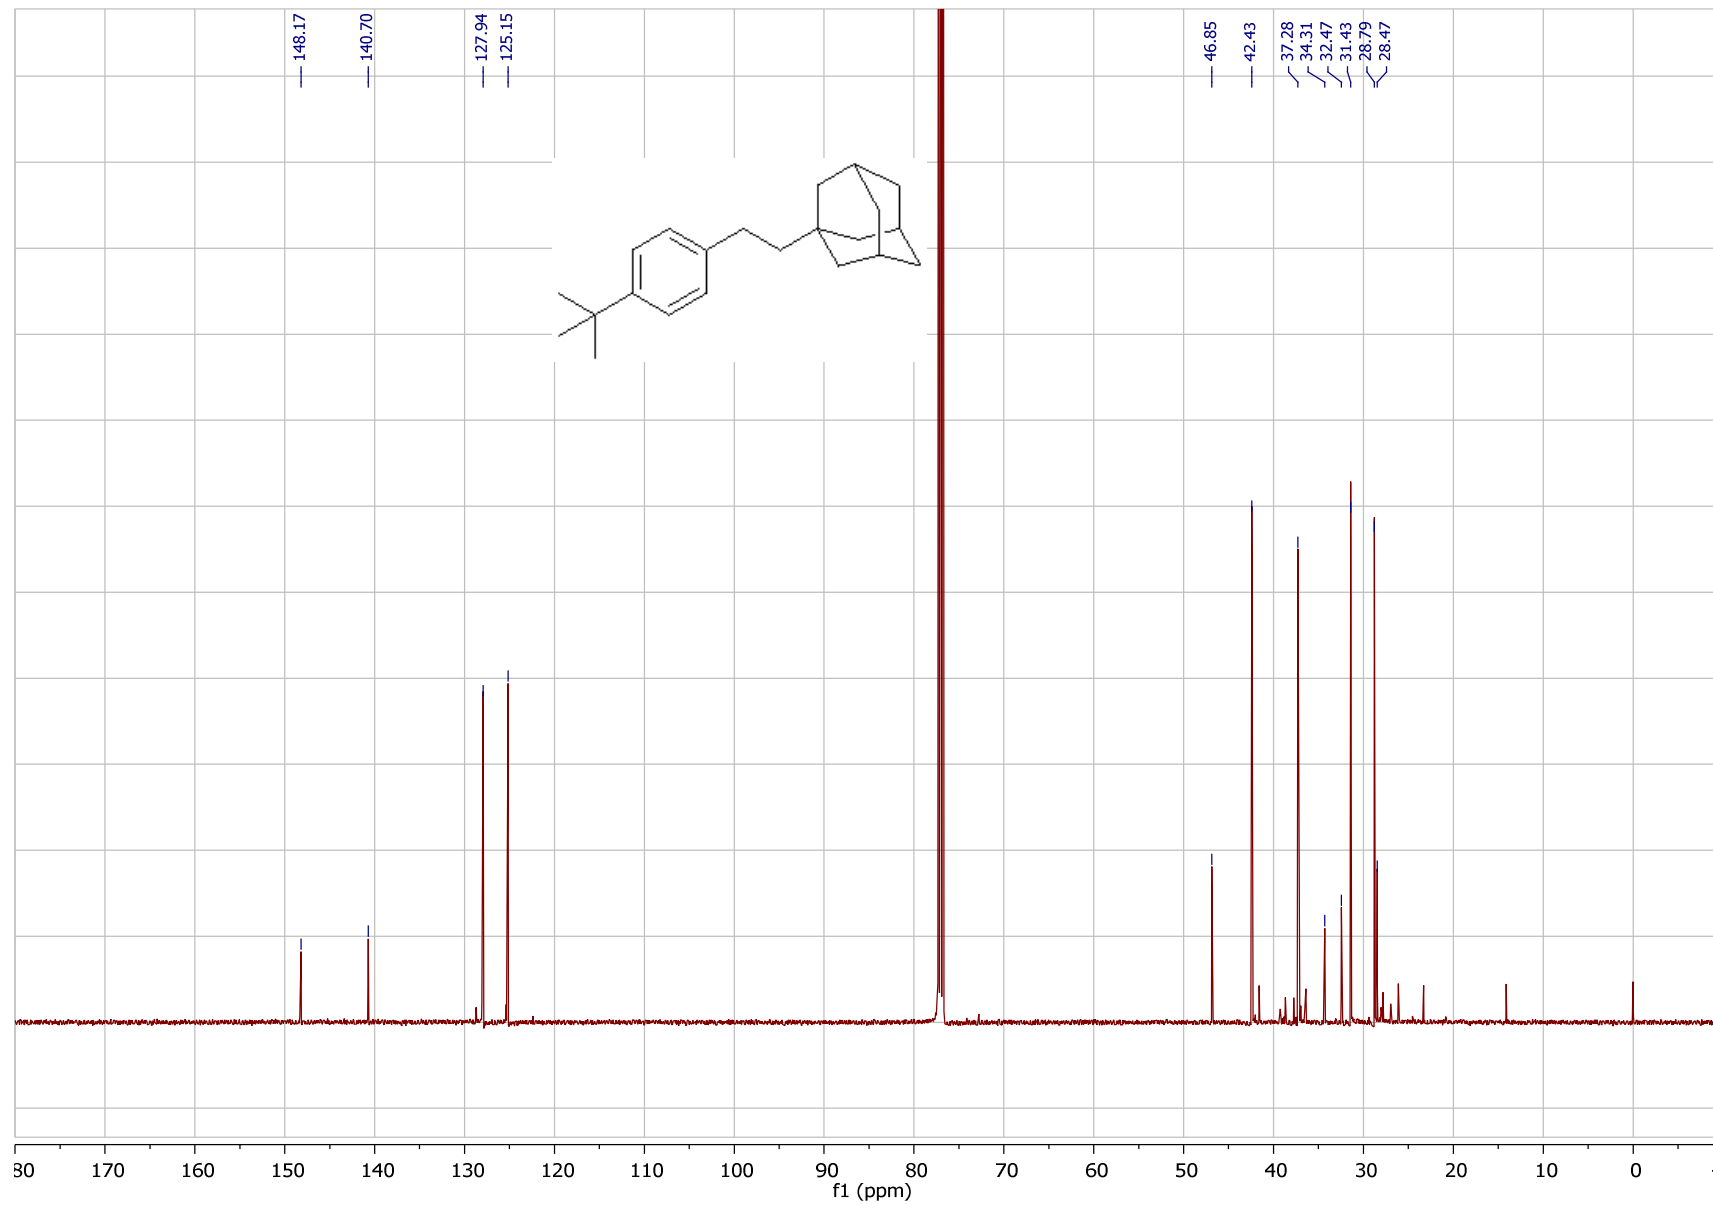

# Arene 16-P

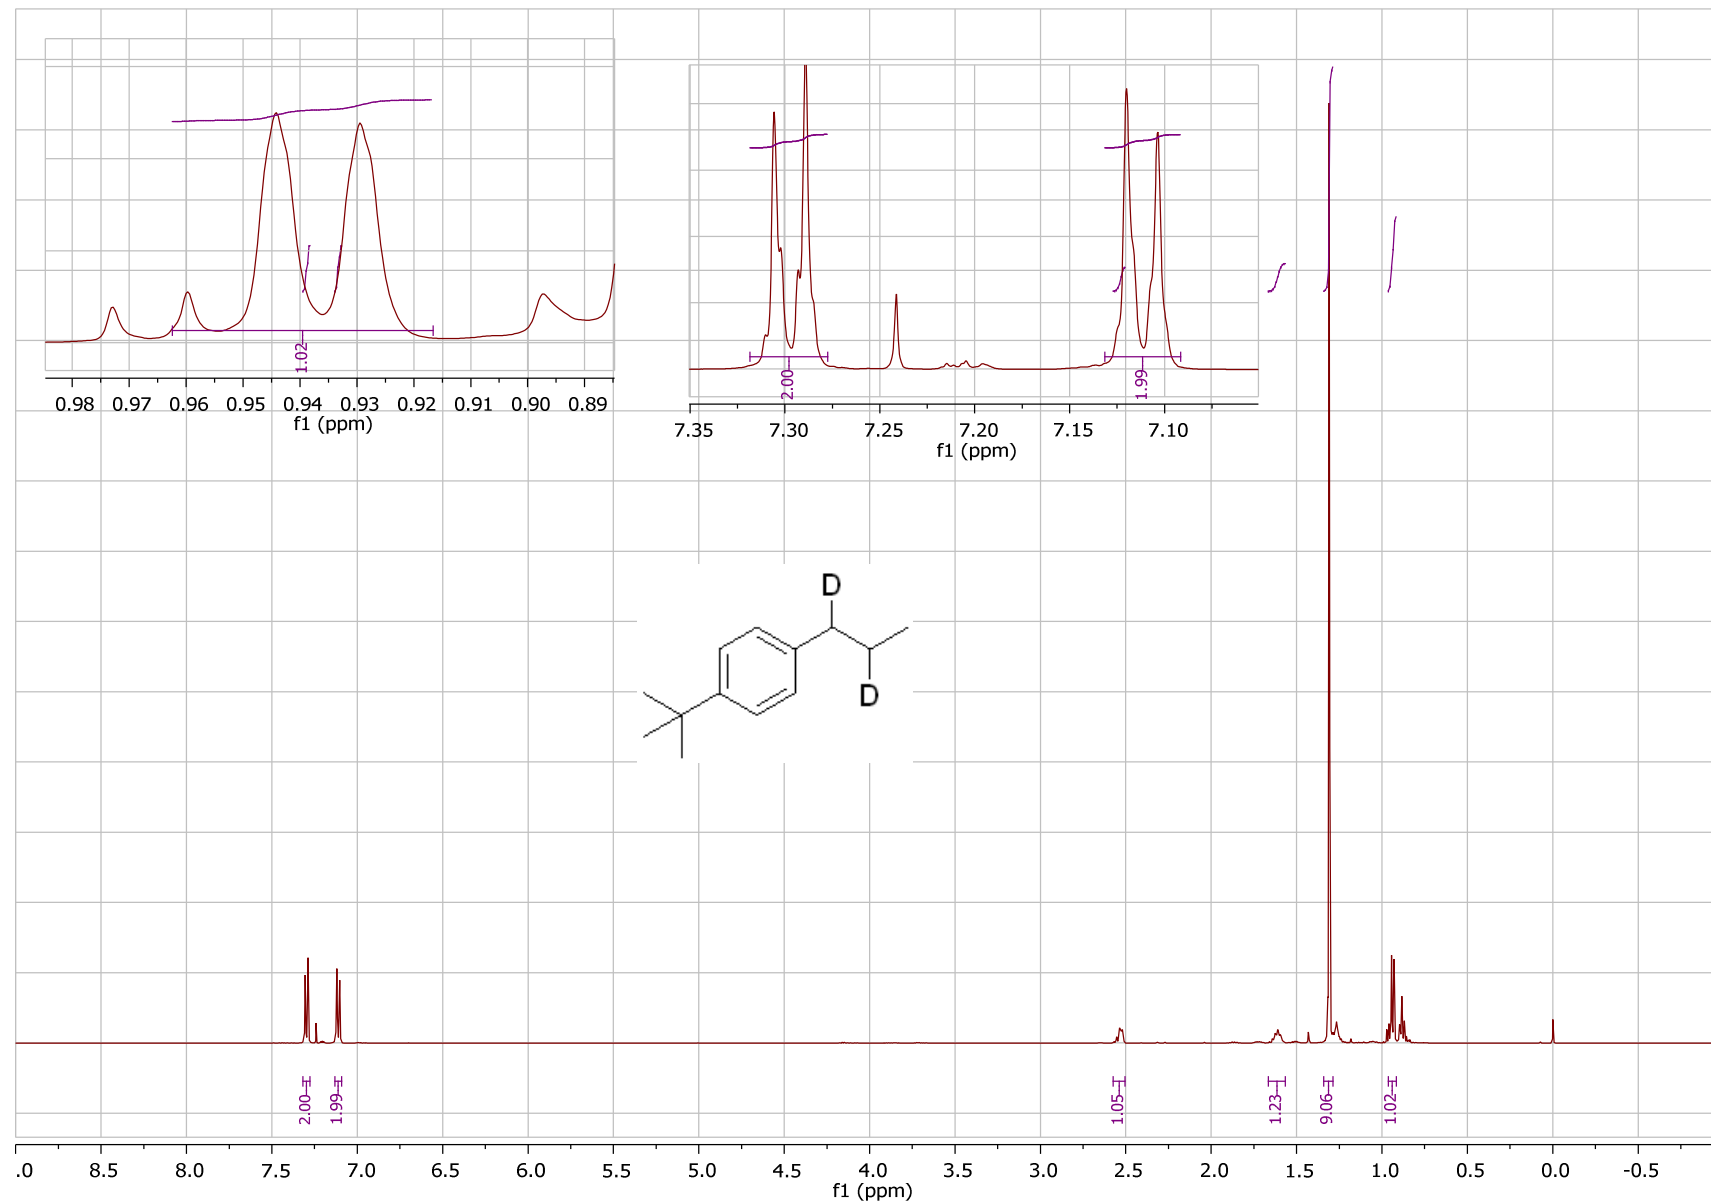

# Arene 16-P

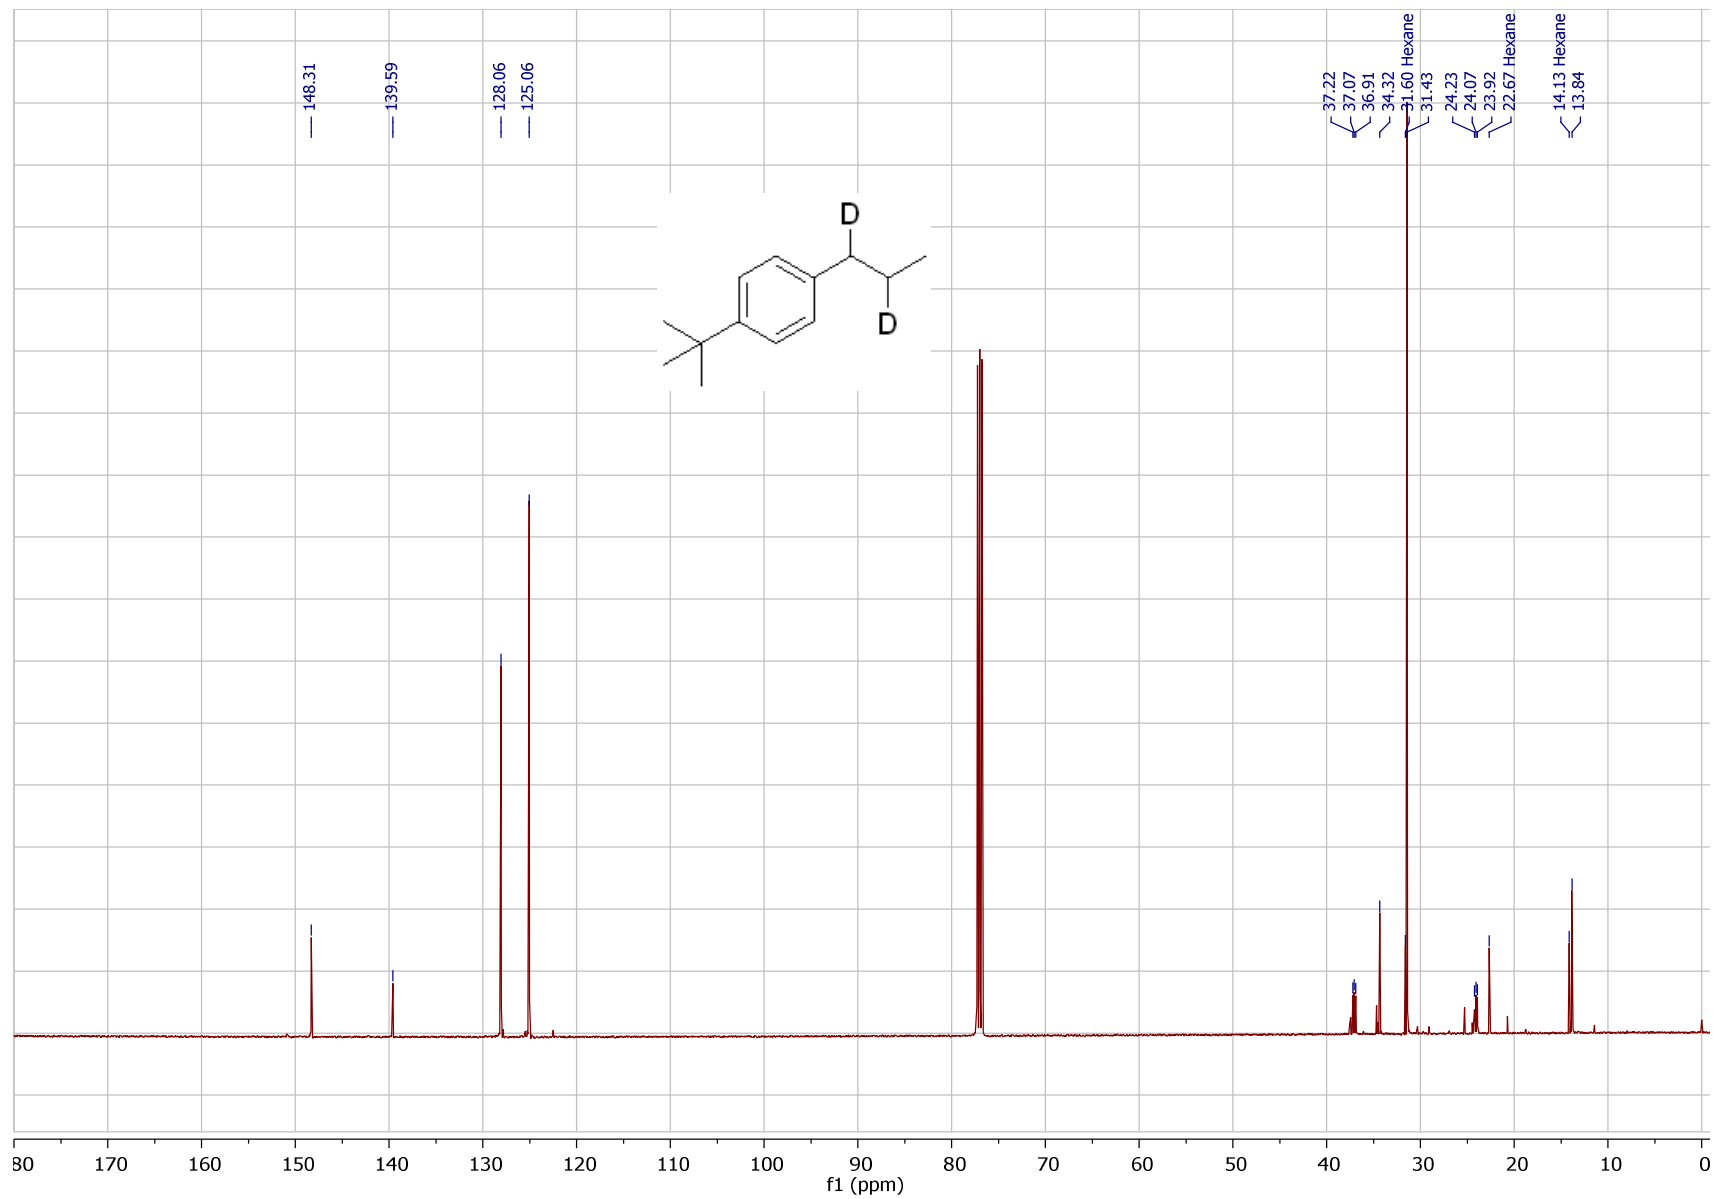

# Compound 1

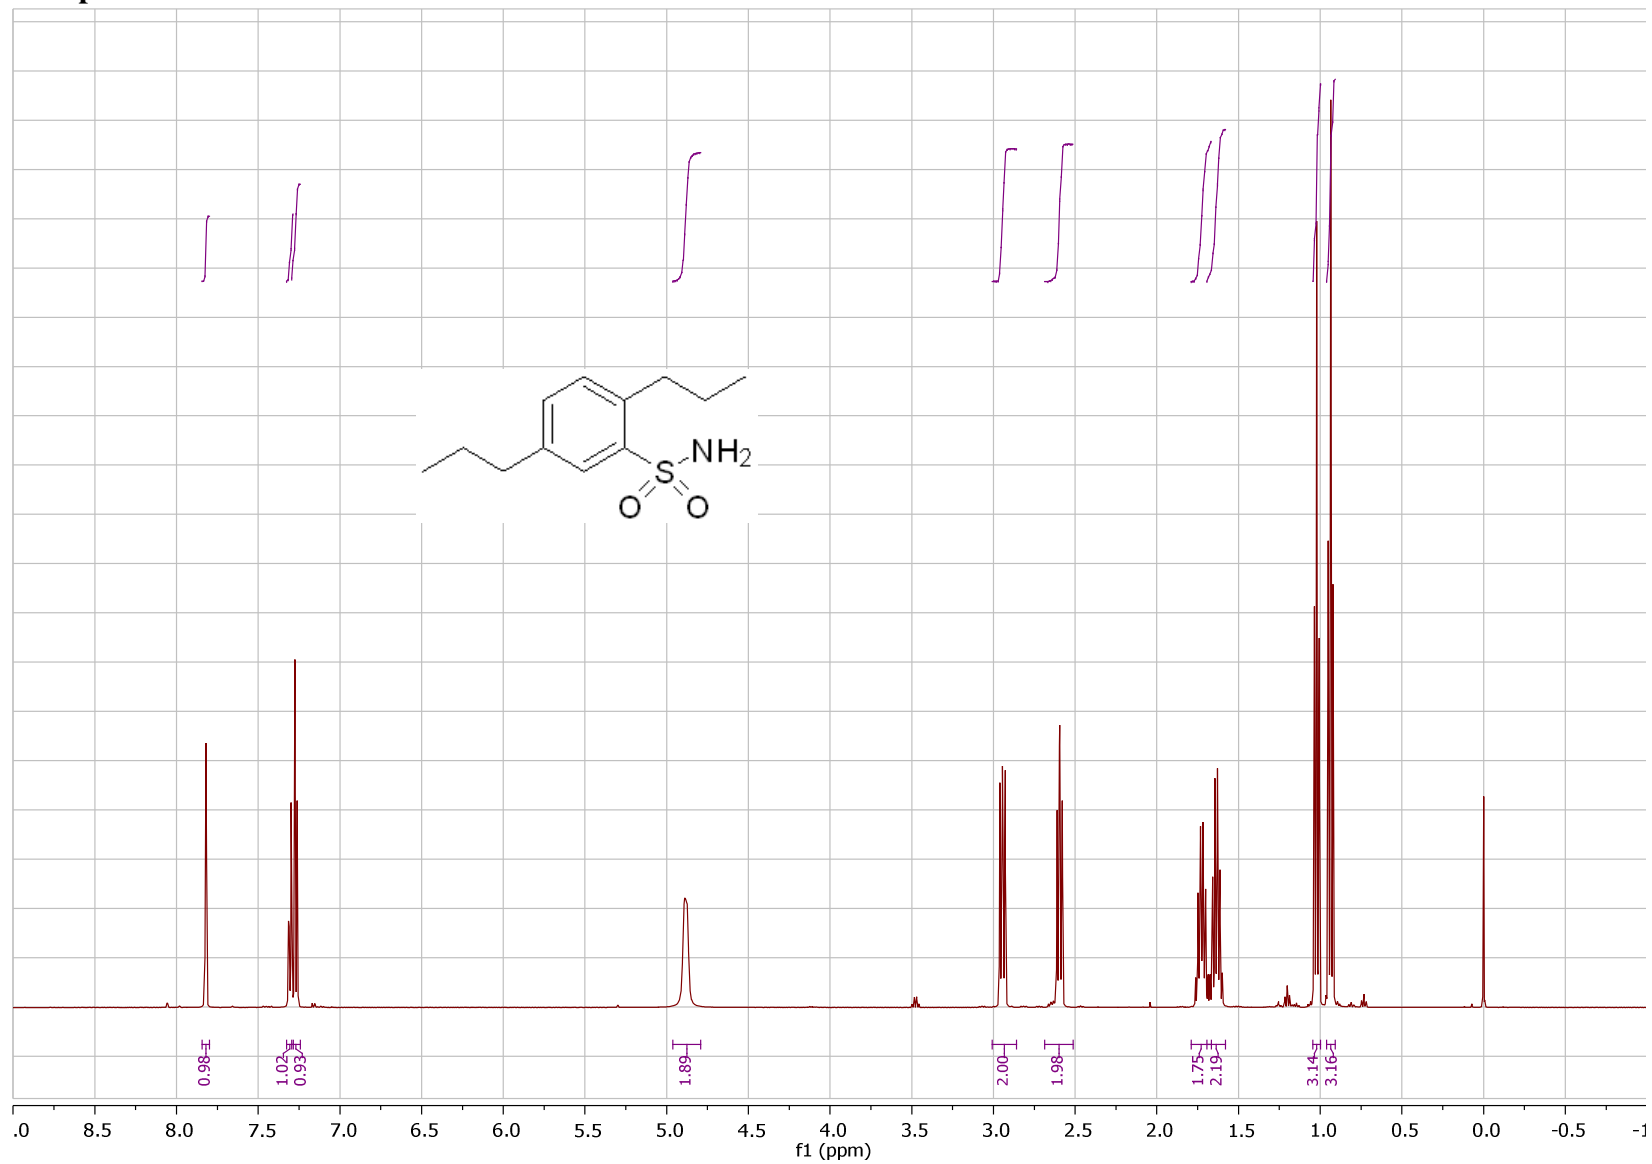

# Compound 1

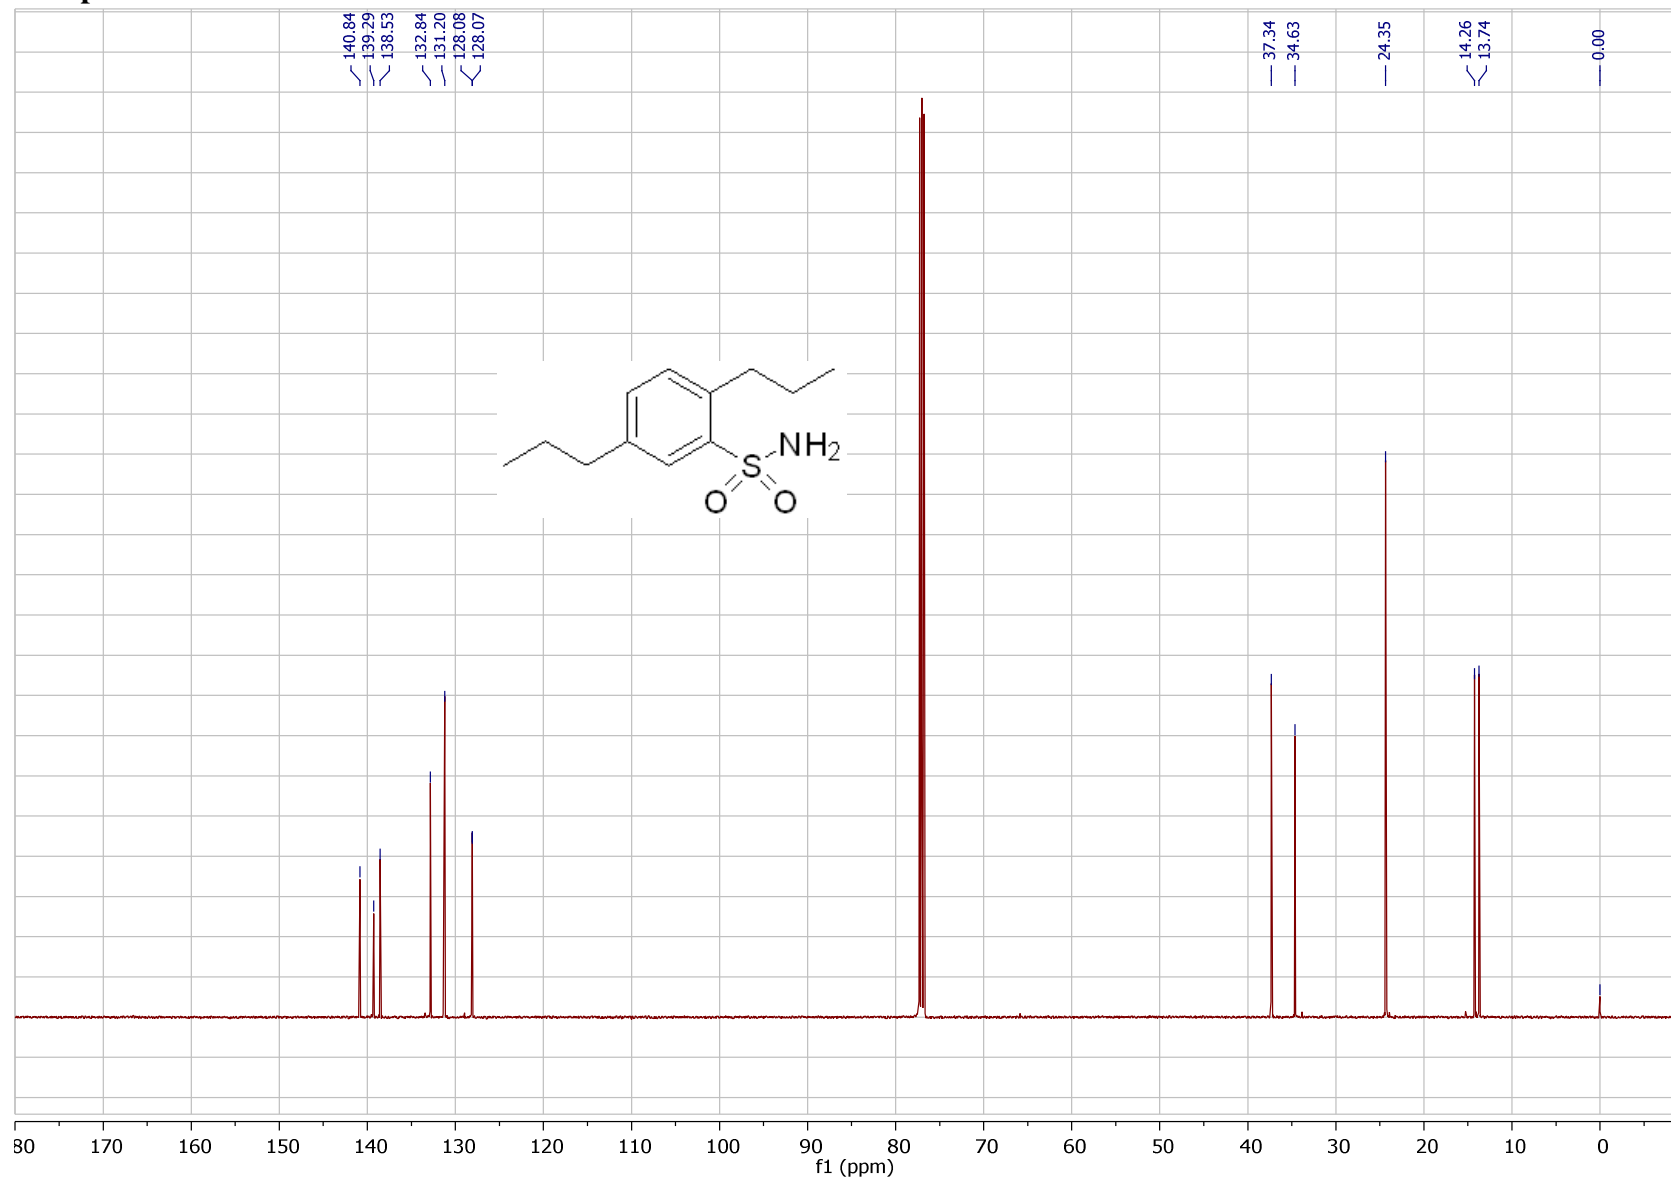

# Compound 2

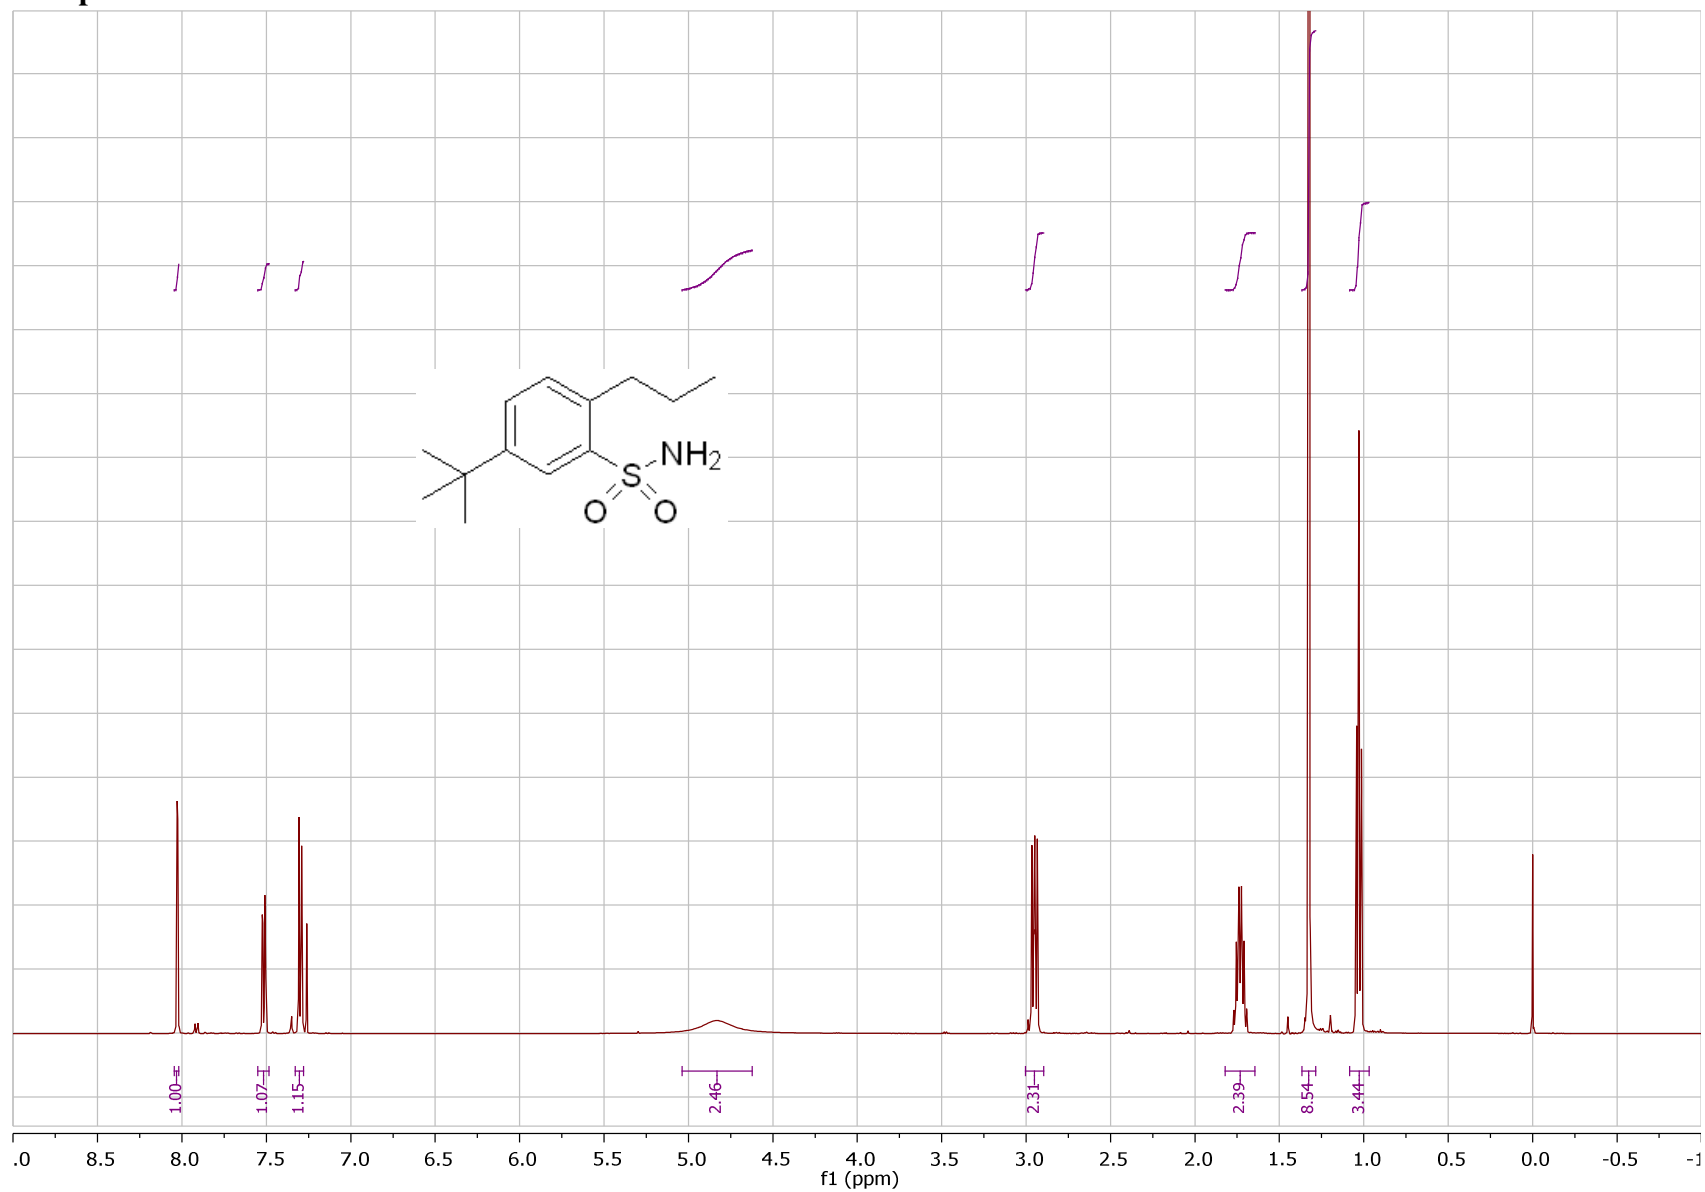

## Compound 2

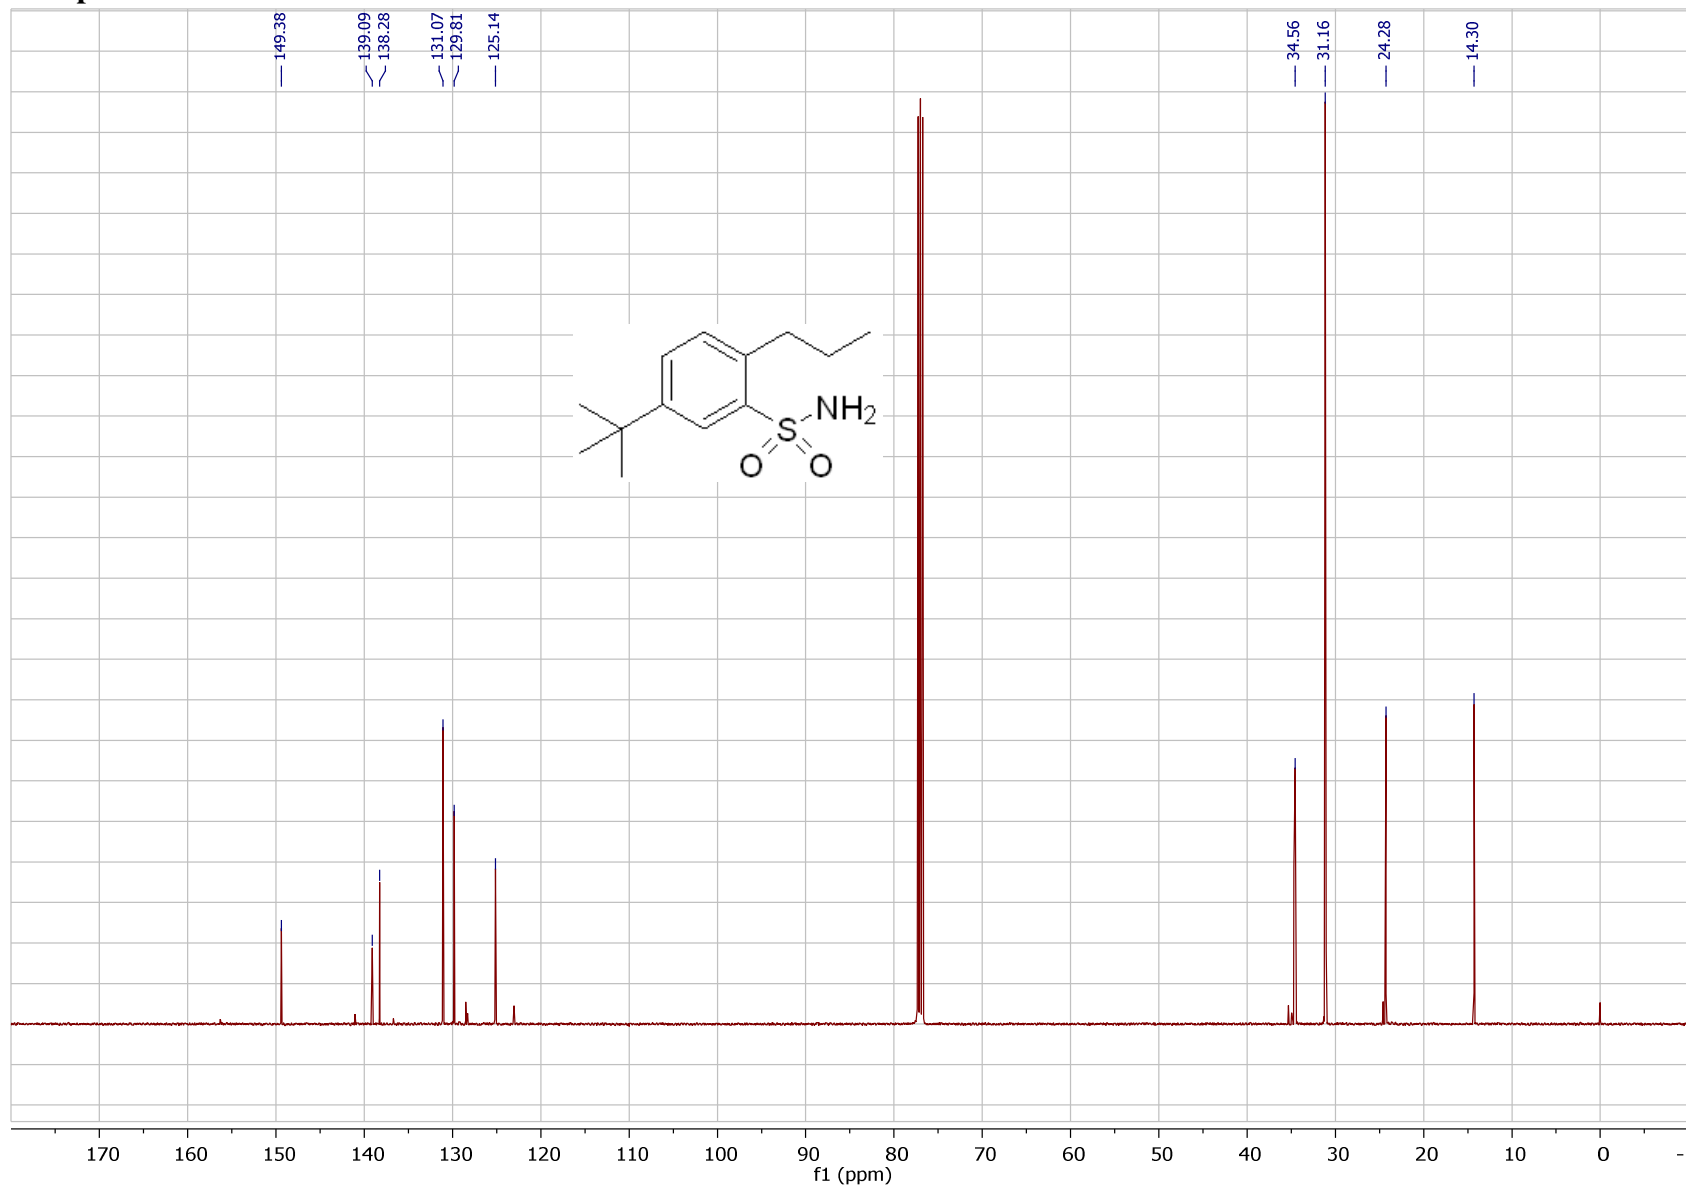

# Compound 3

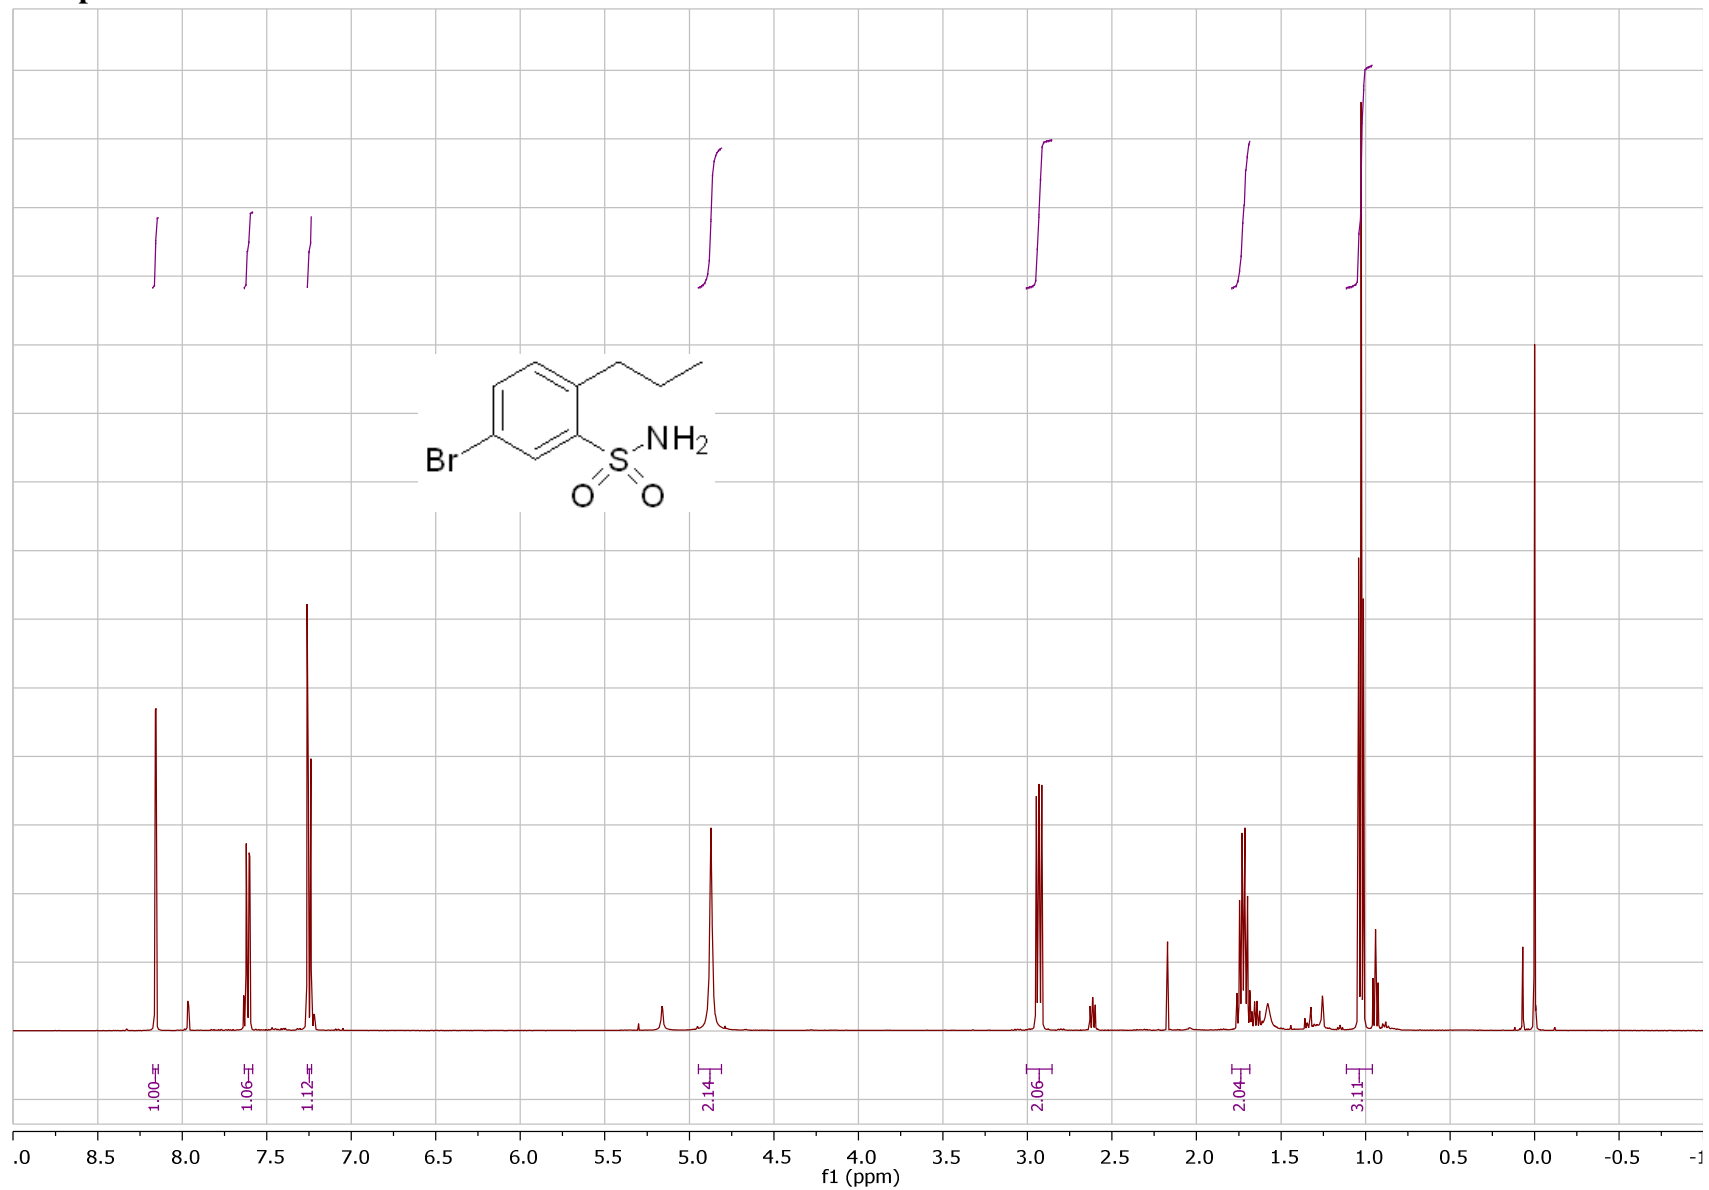

# Compound 3

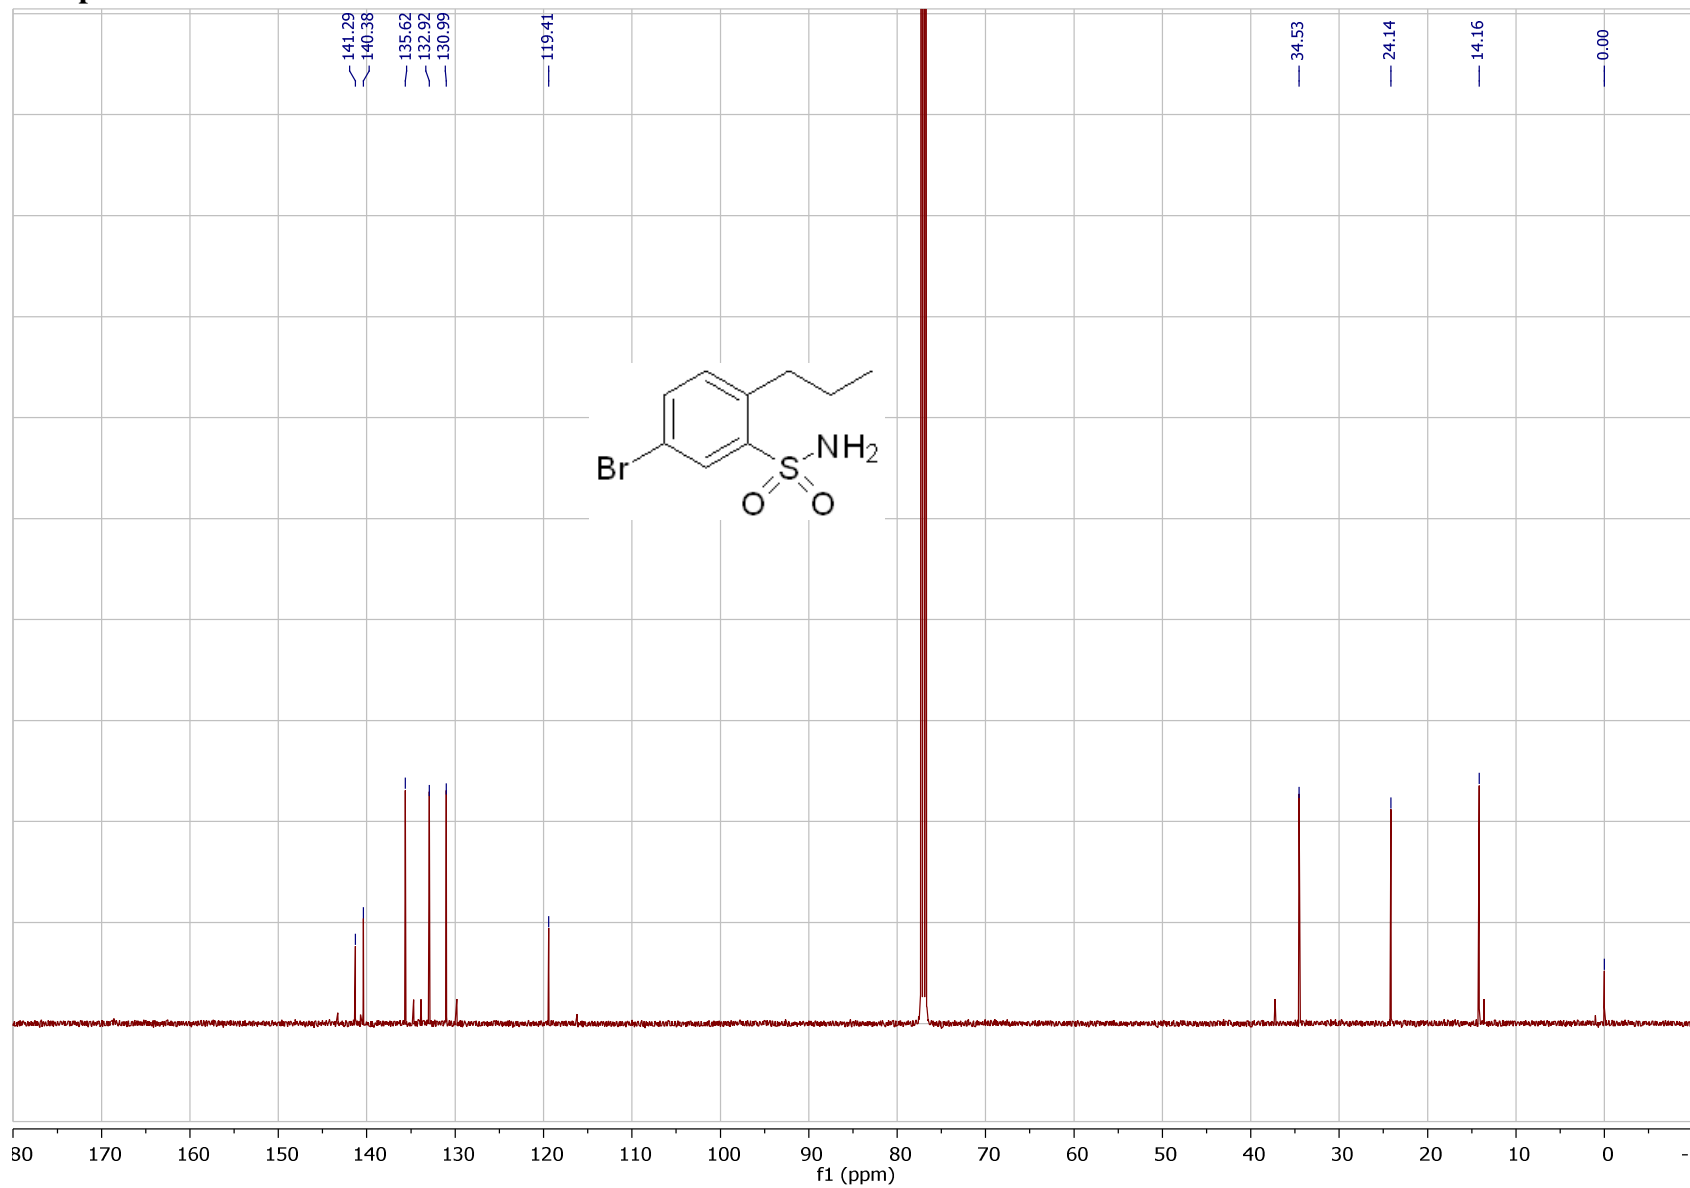

# Compound 4

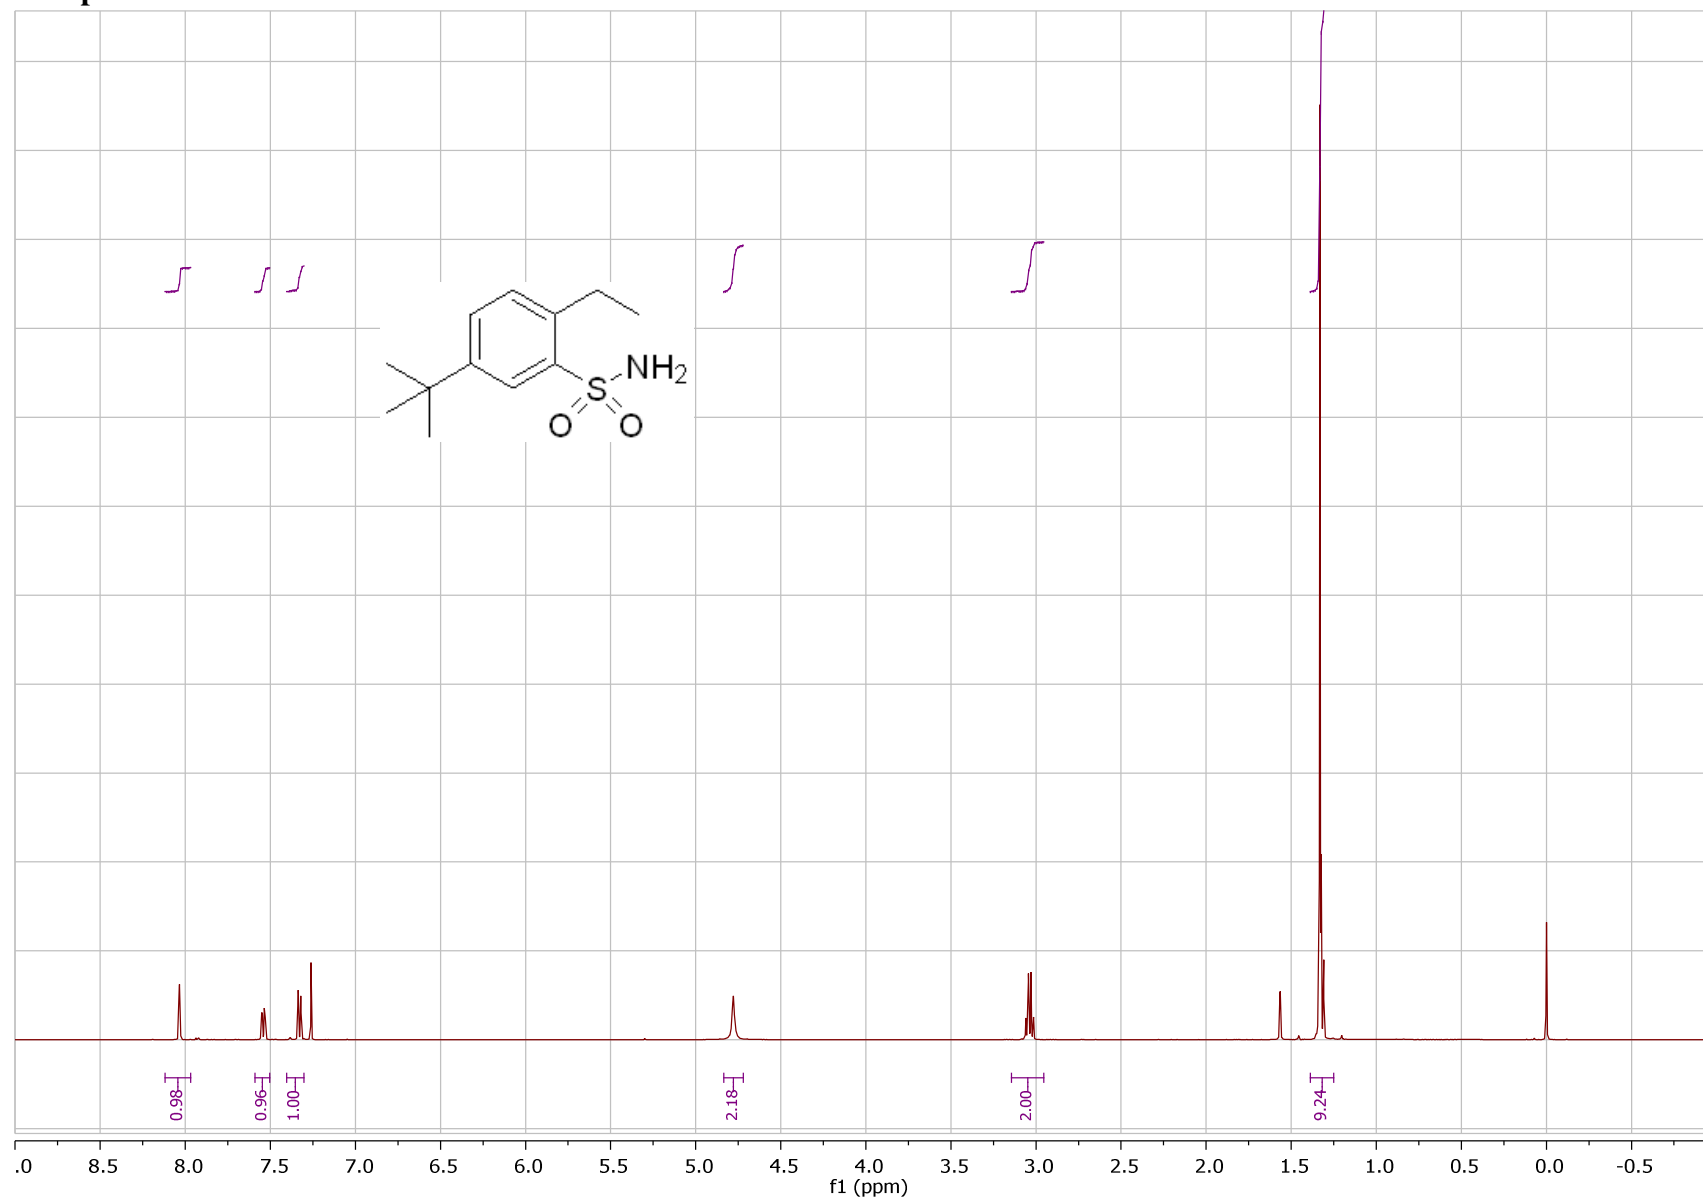

# Compound 4

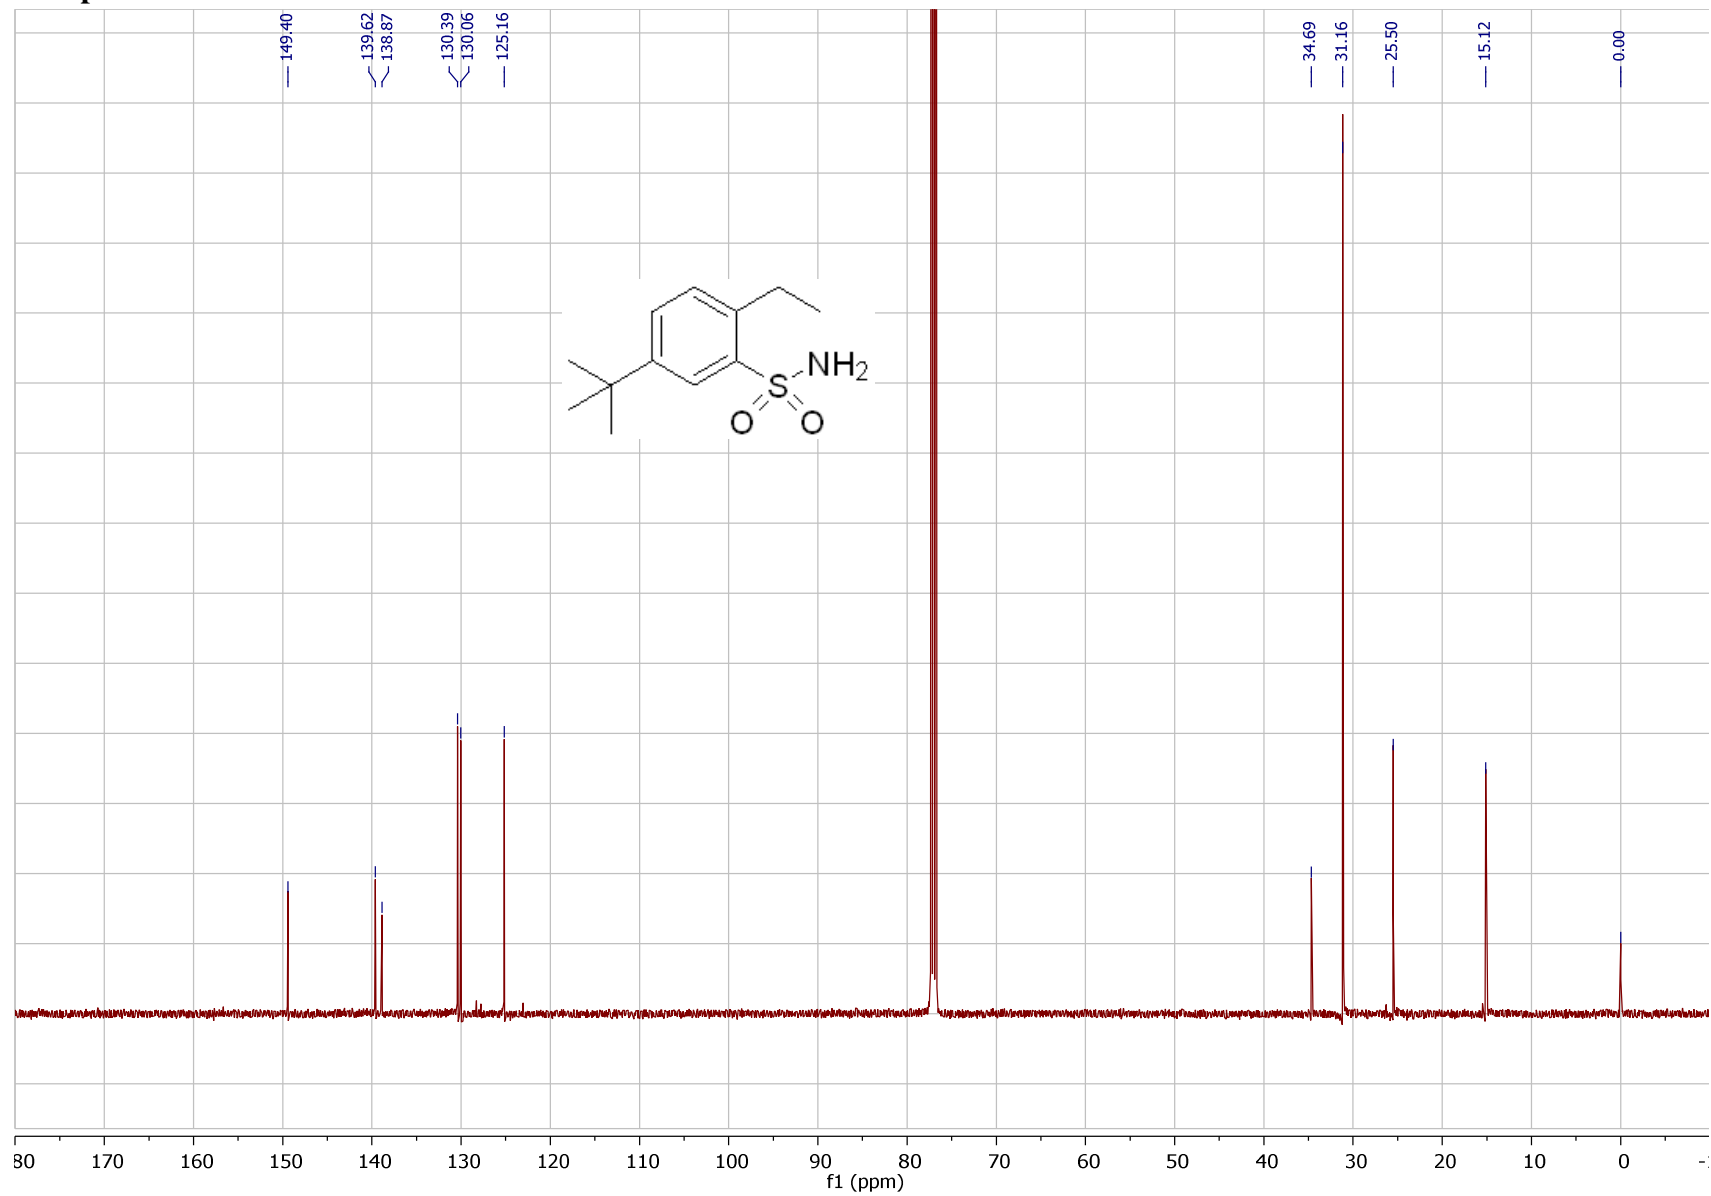

**Compound 5**

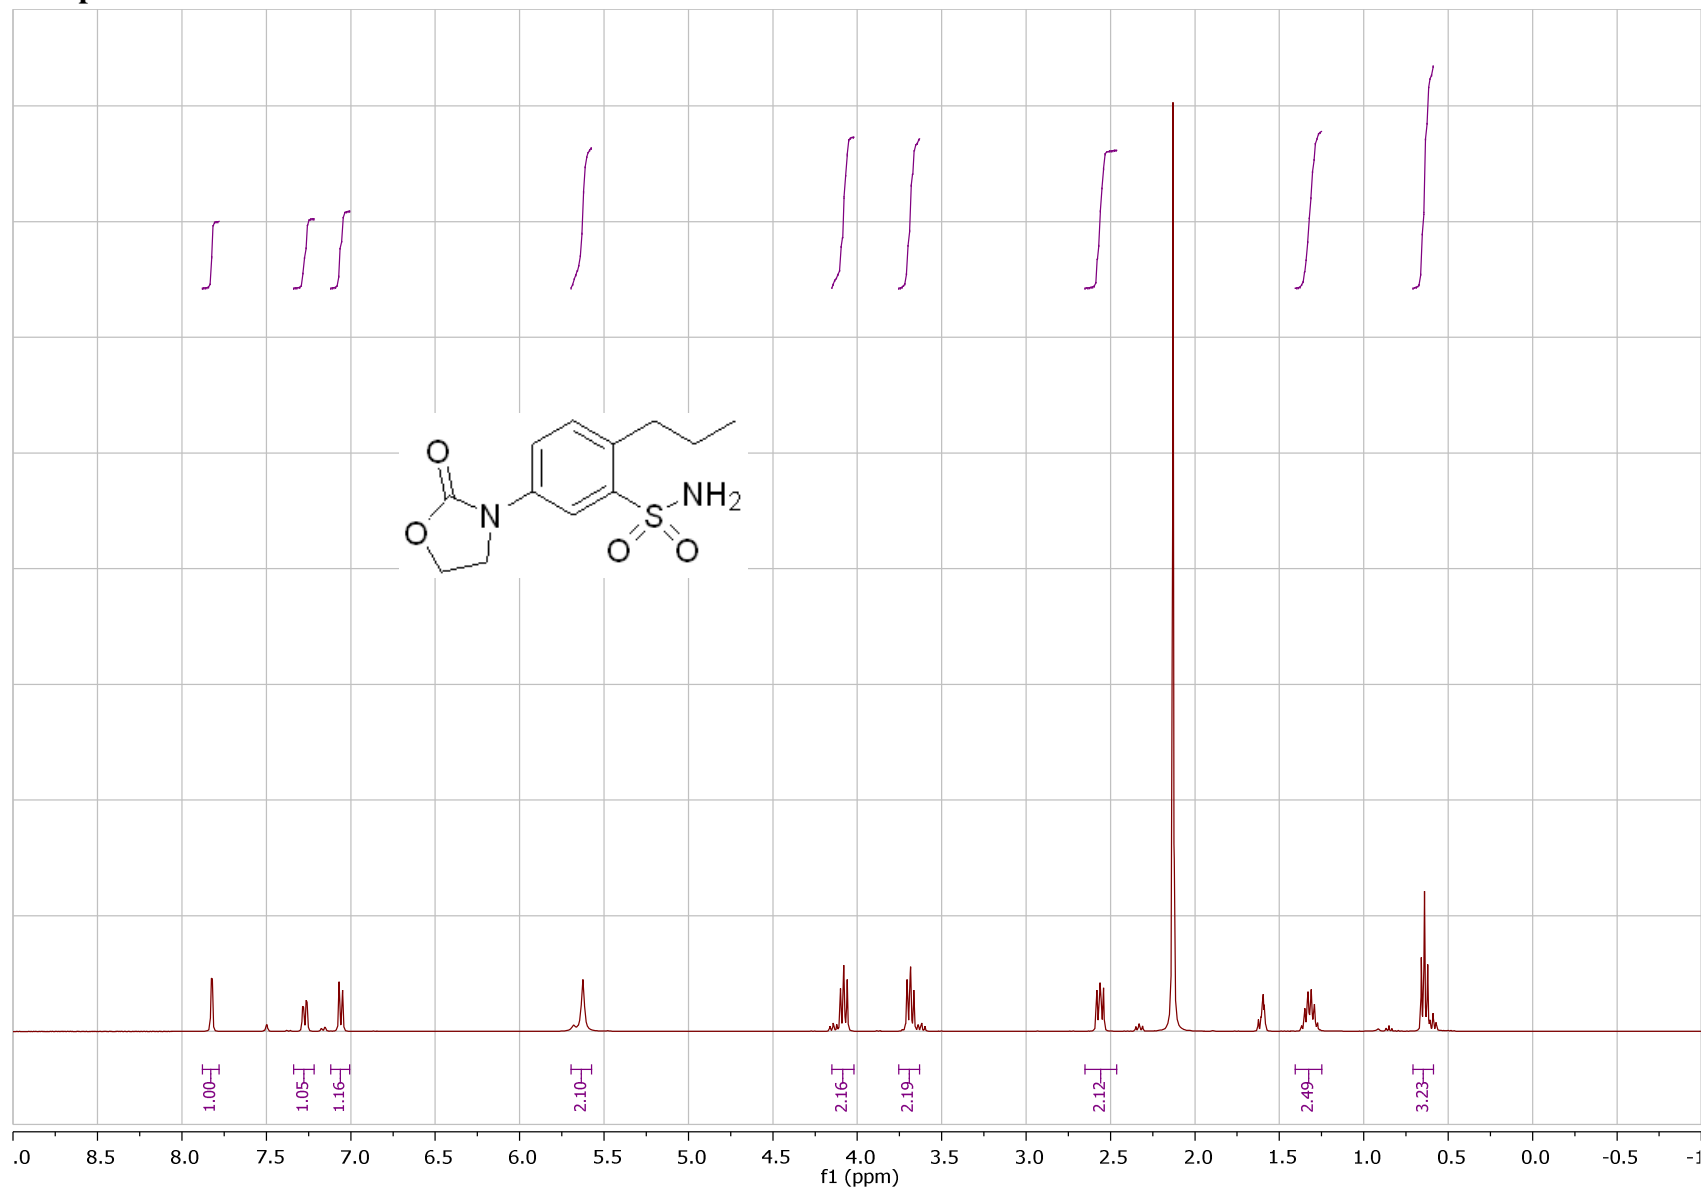

# Compound 5

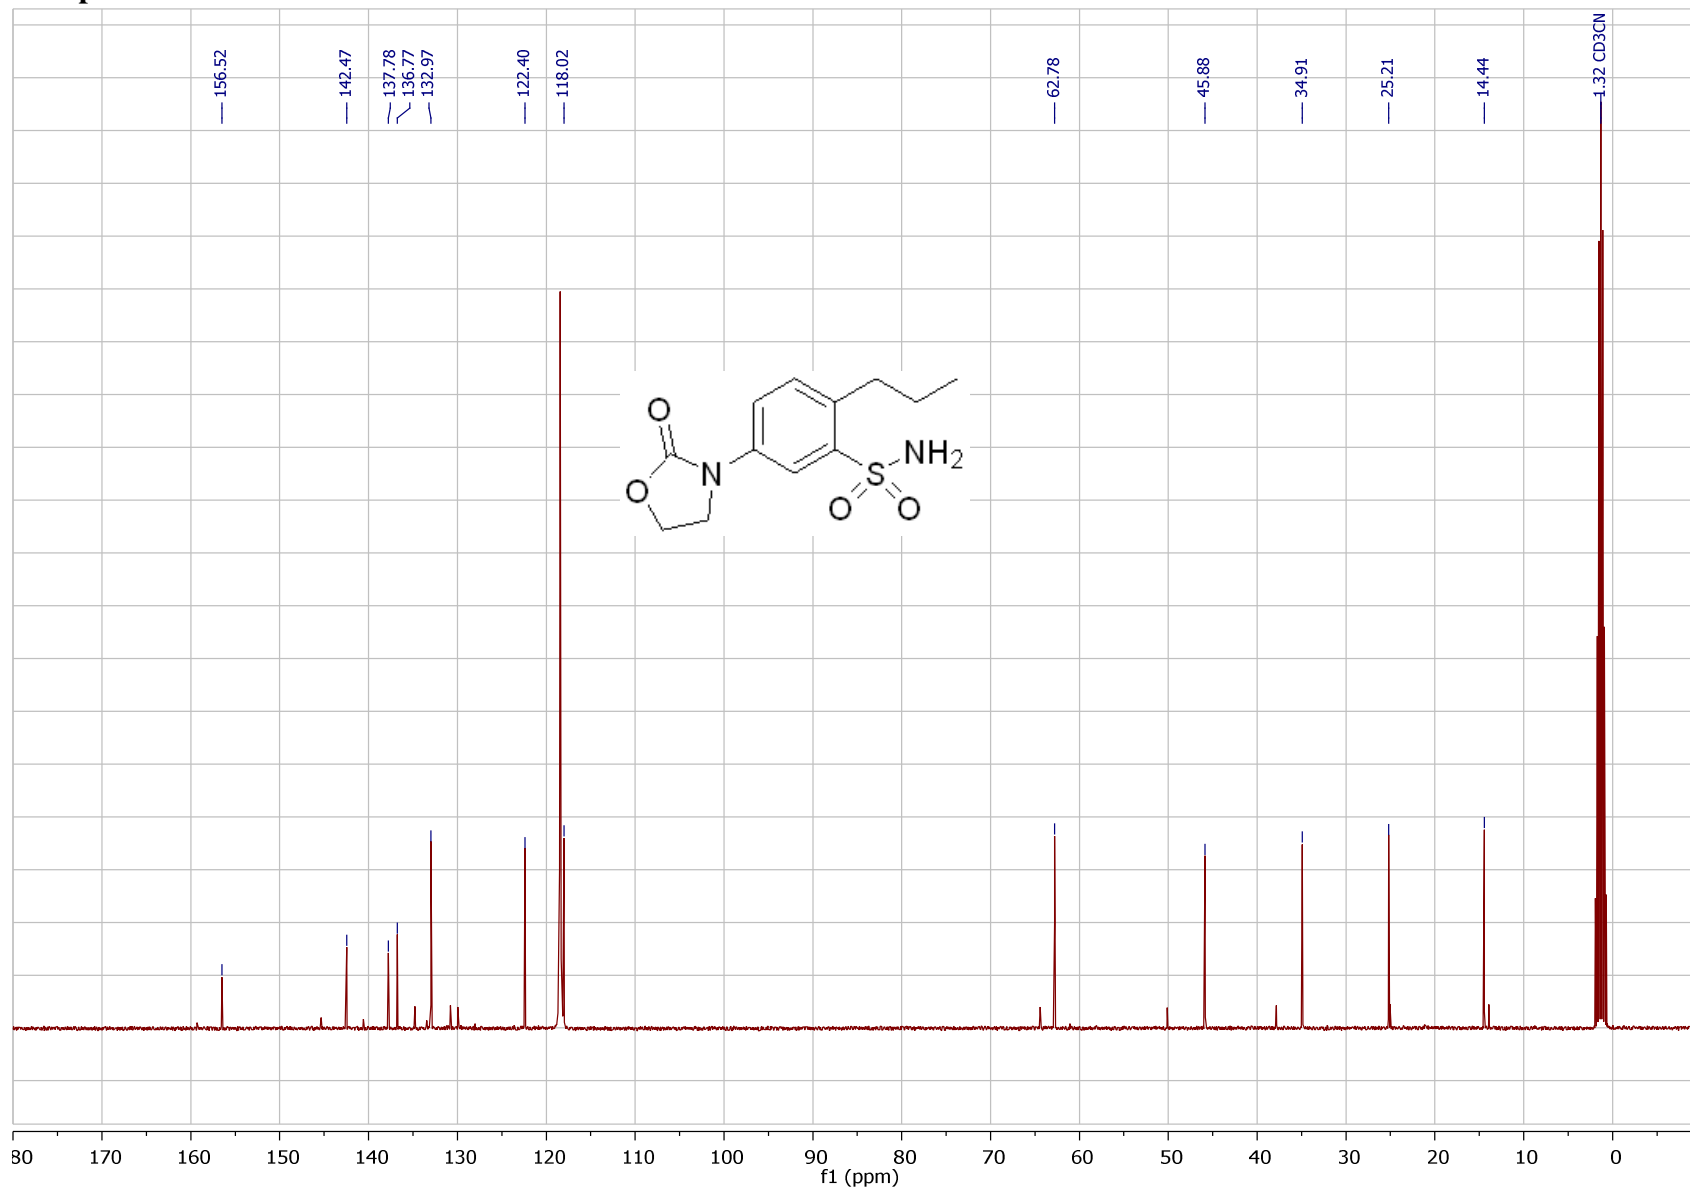

# Compound 6

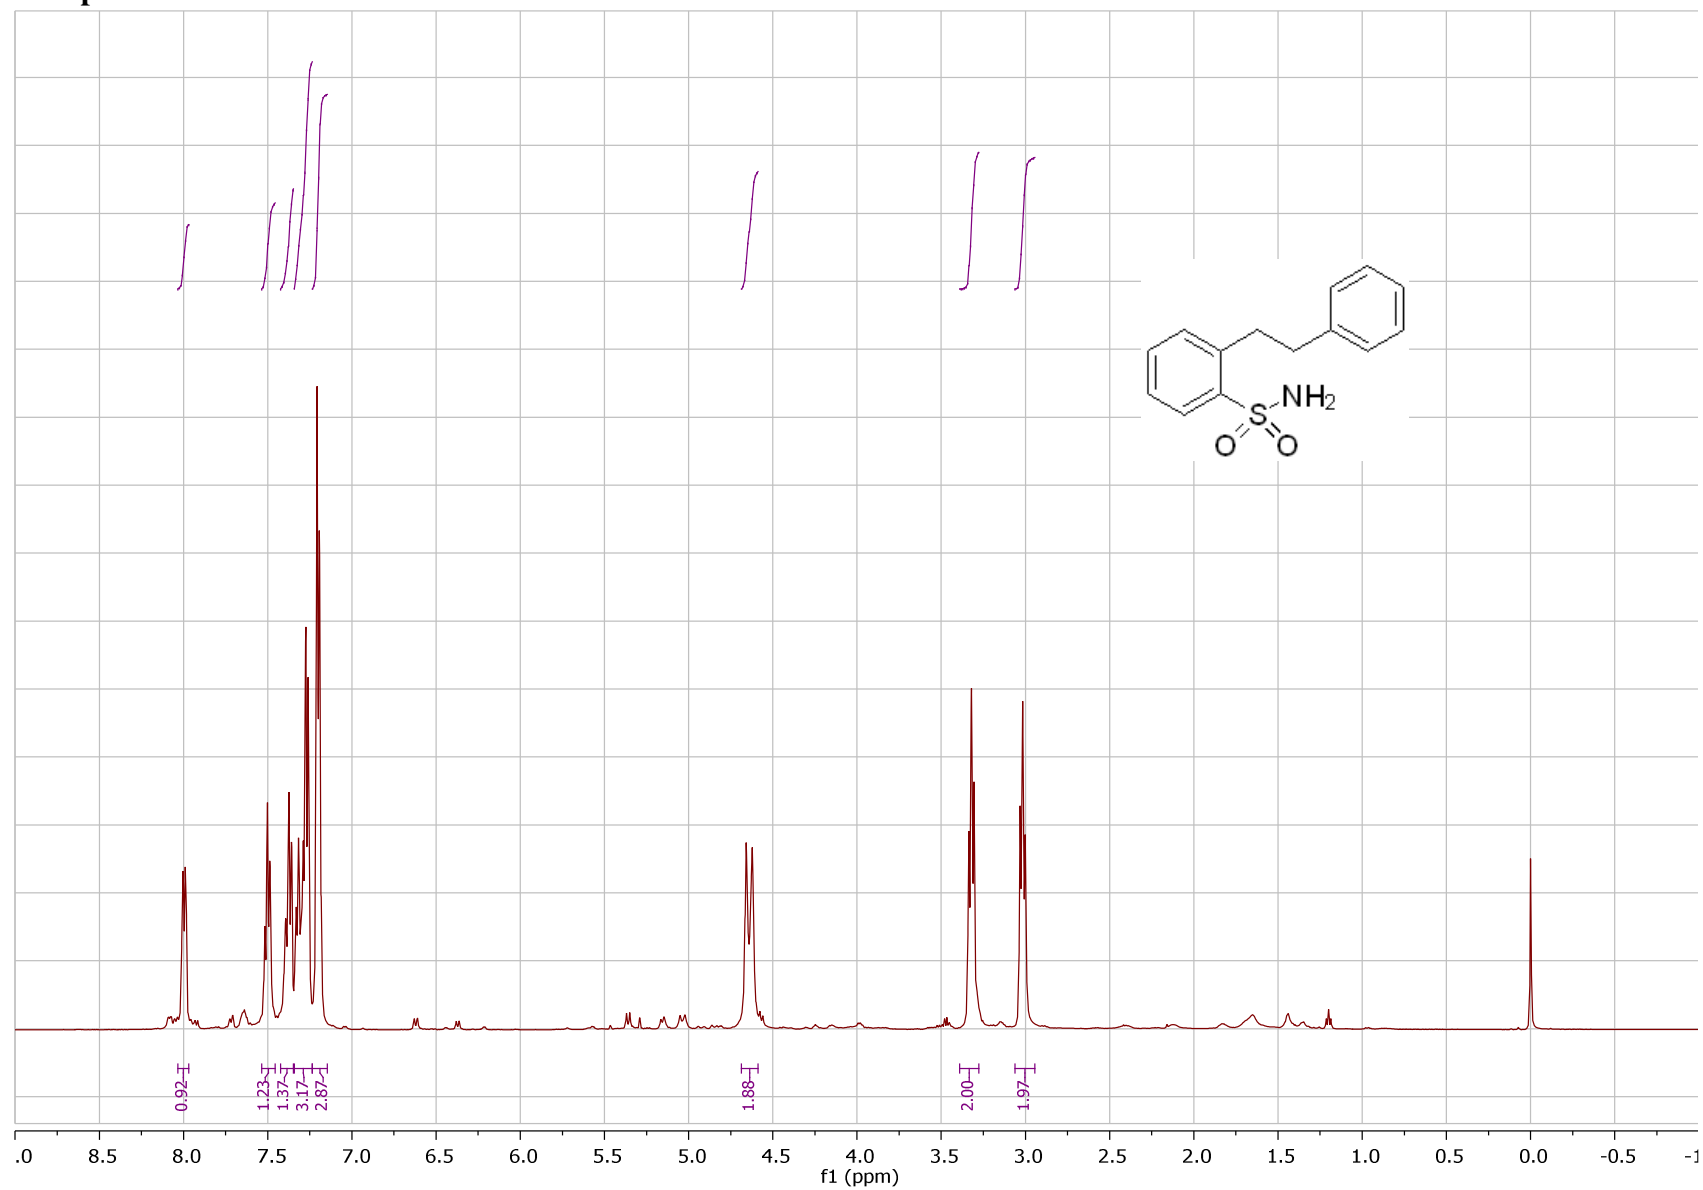

# Compound 6

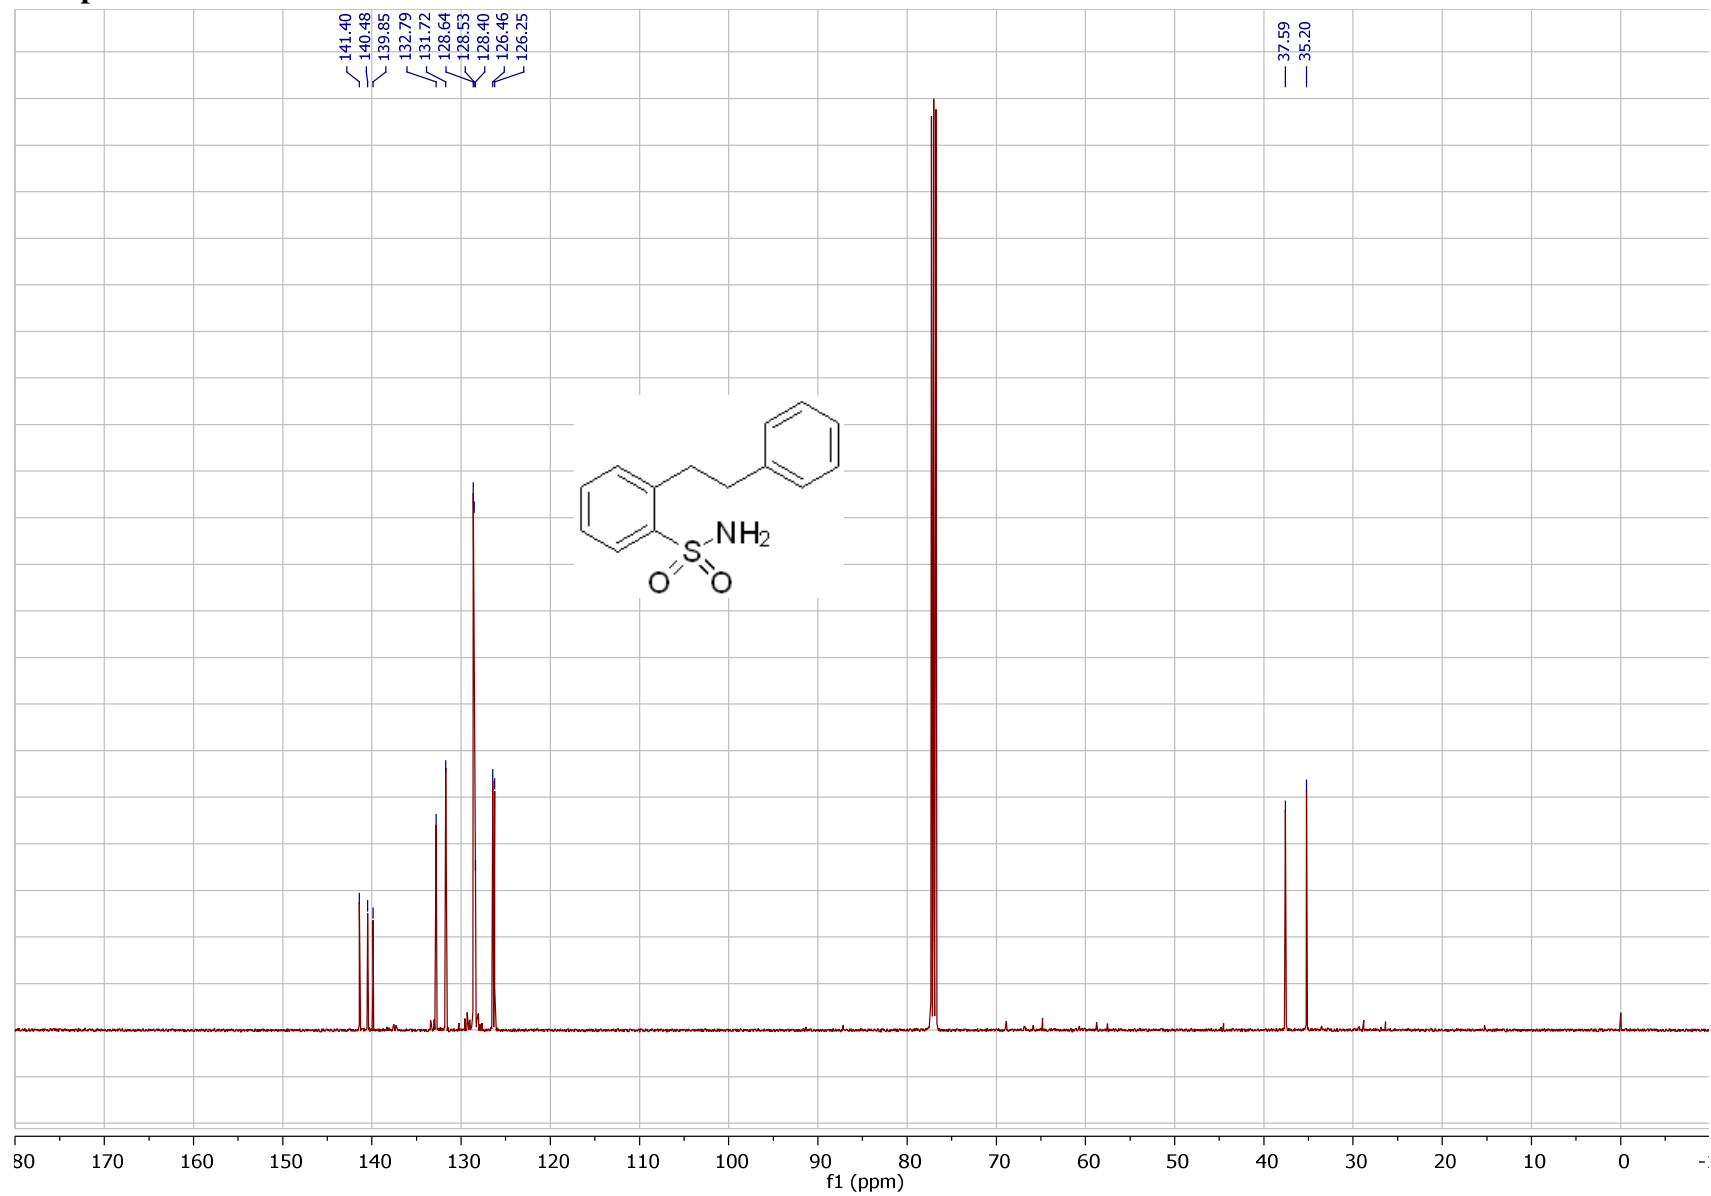

# Compound 7

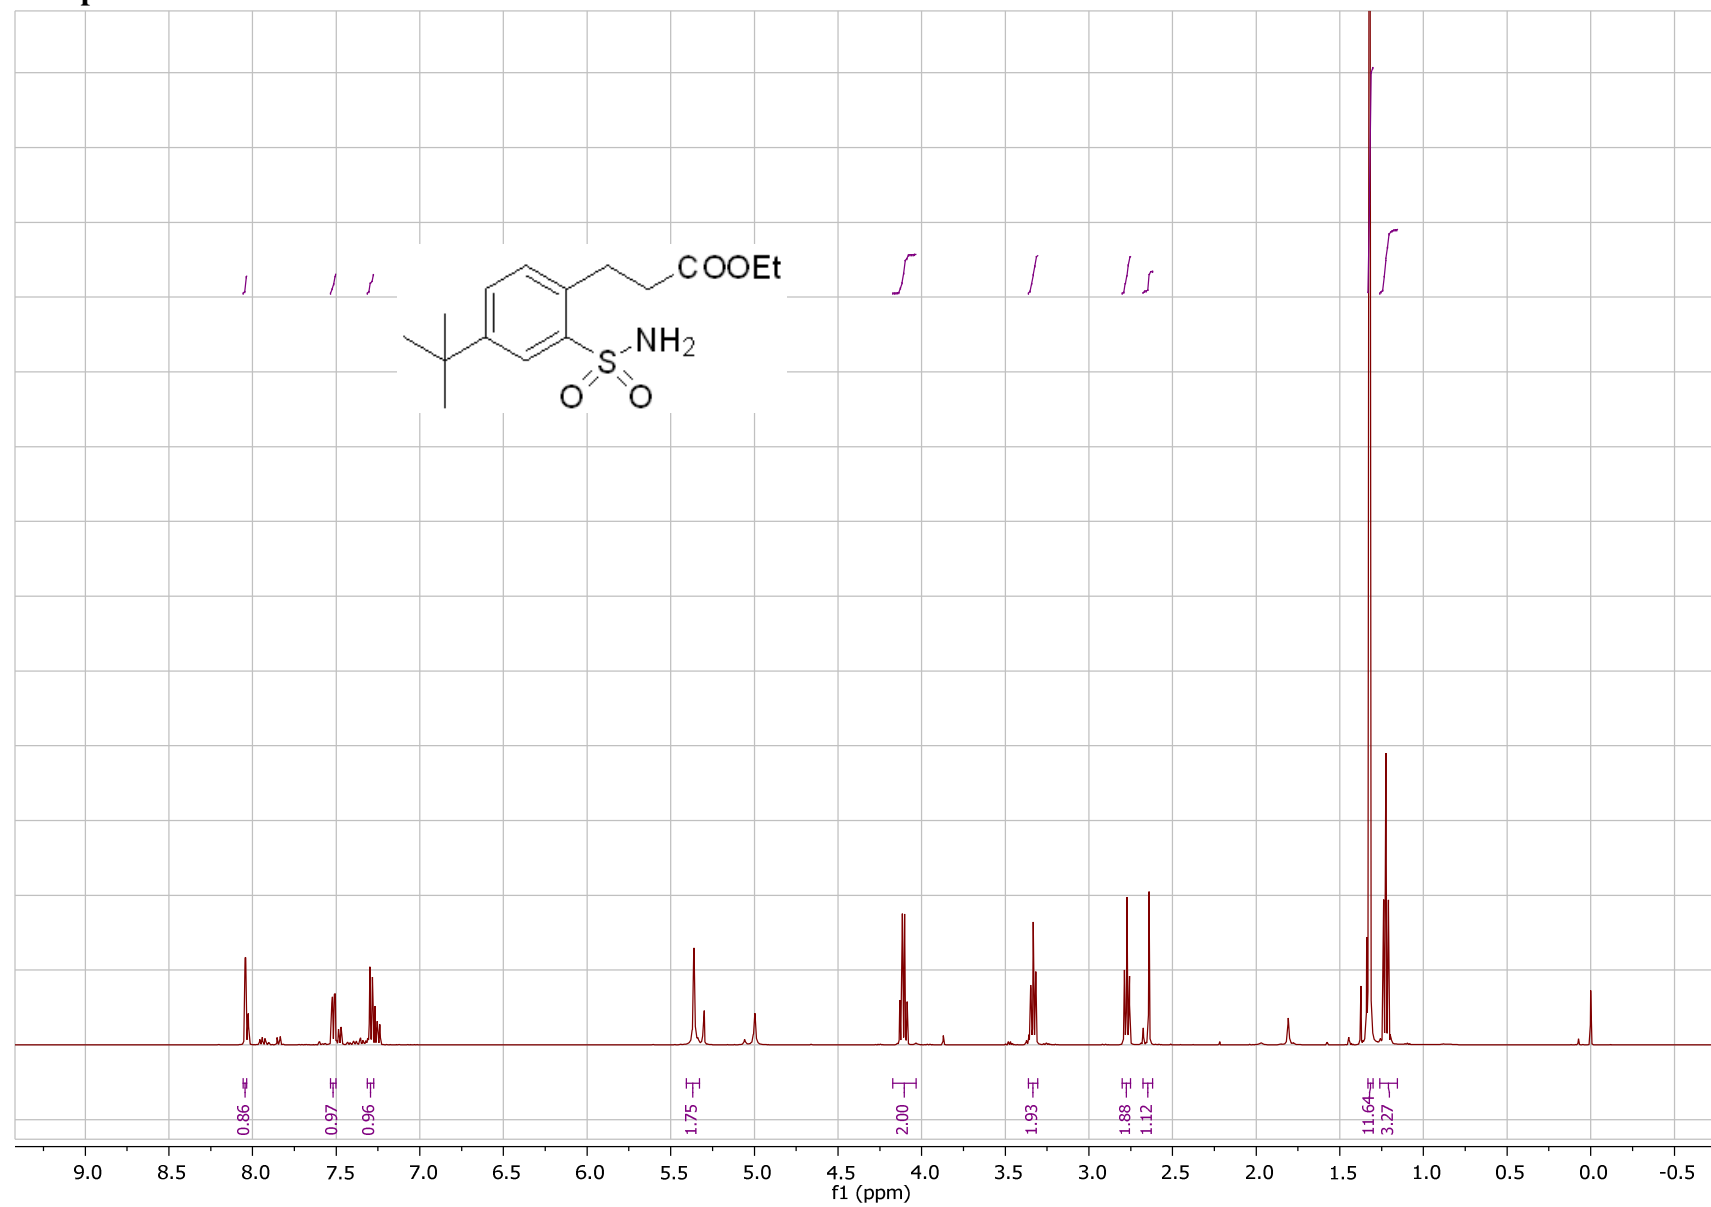

# Compound 7

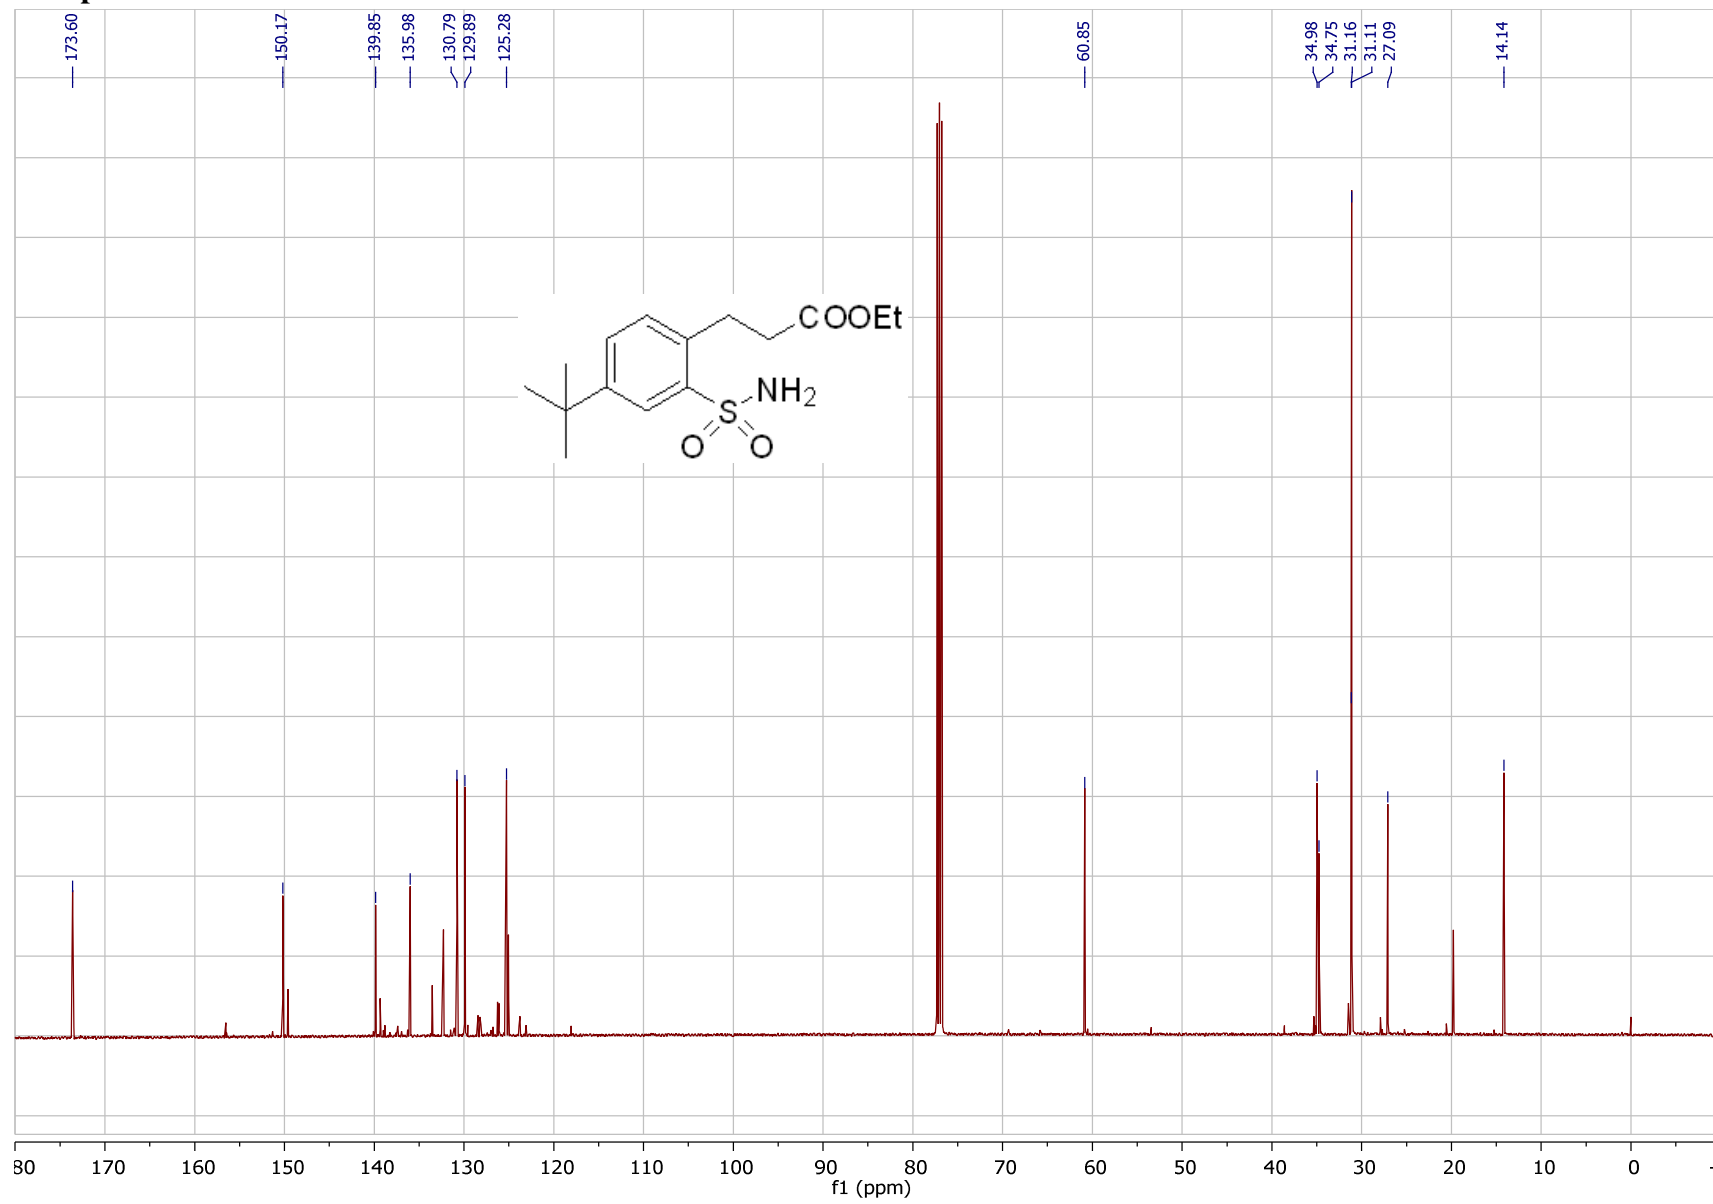

# Compound 8

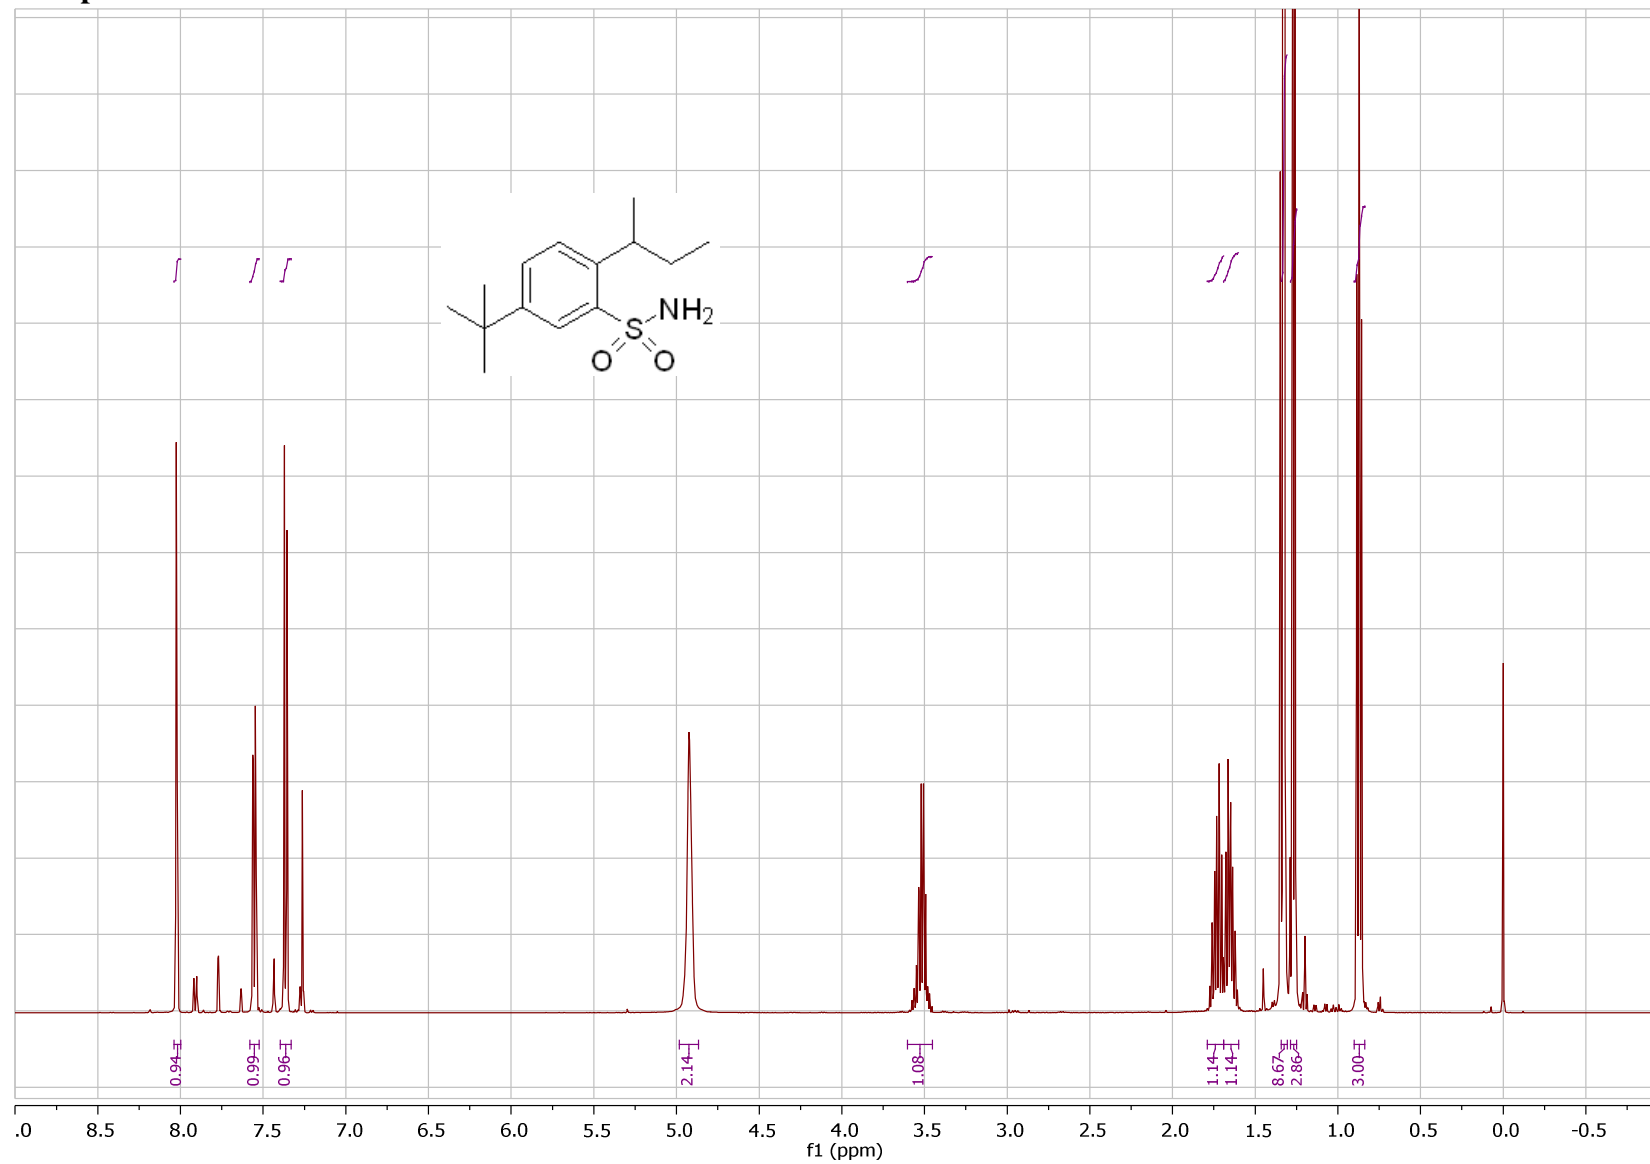

# Compound 8

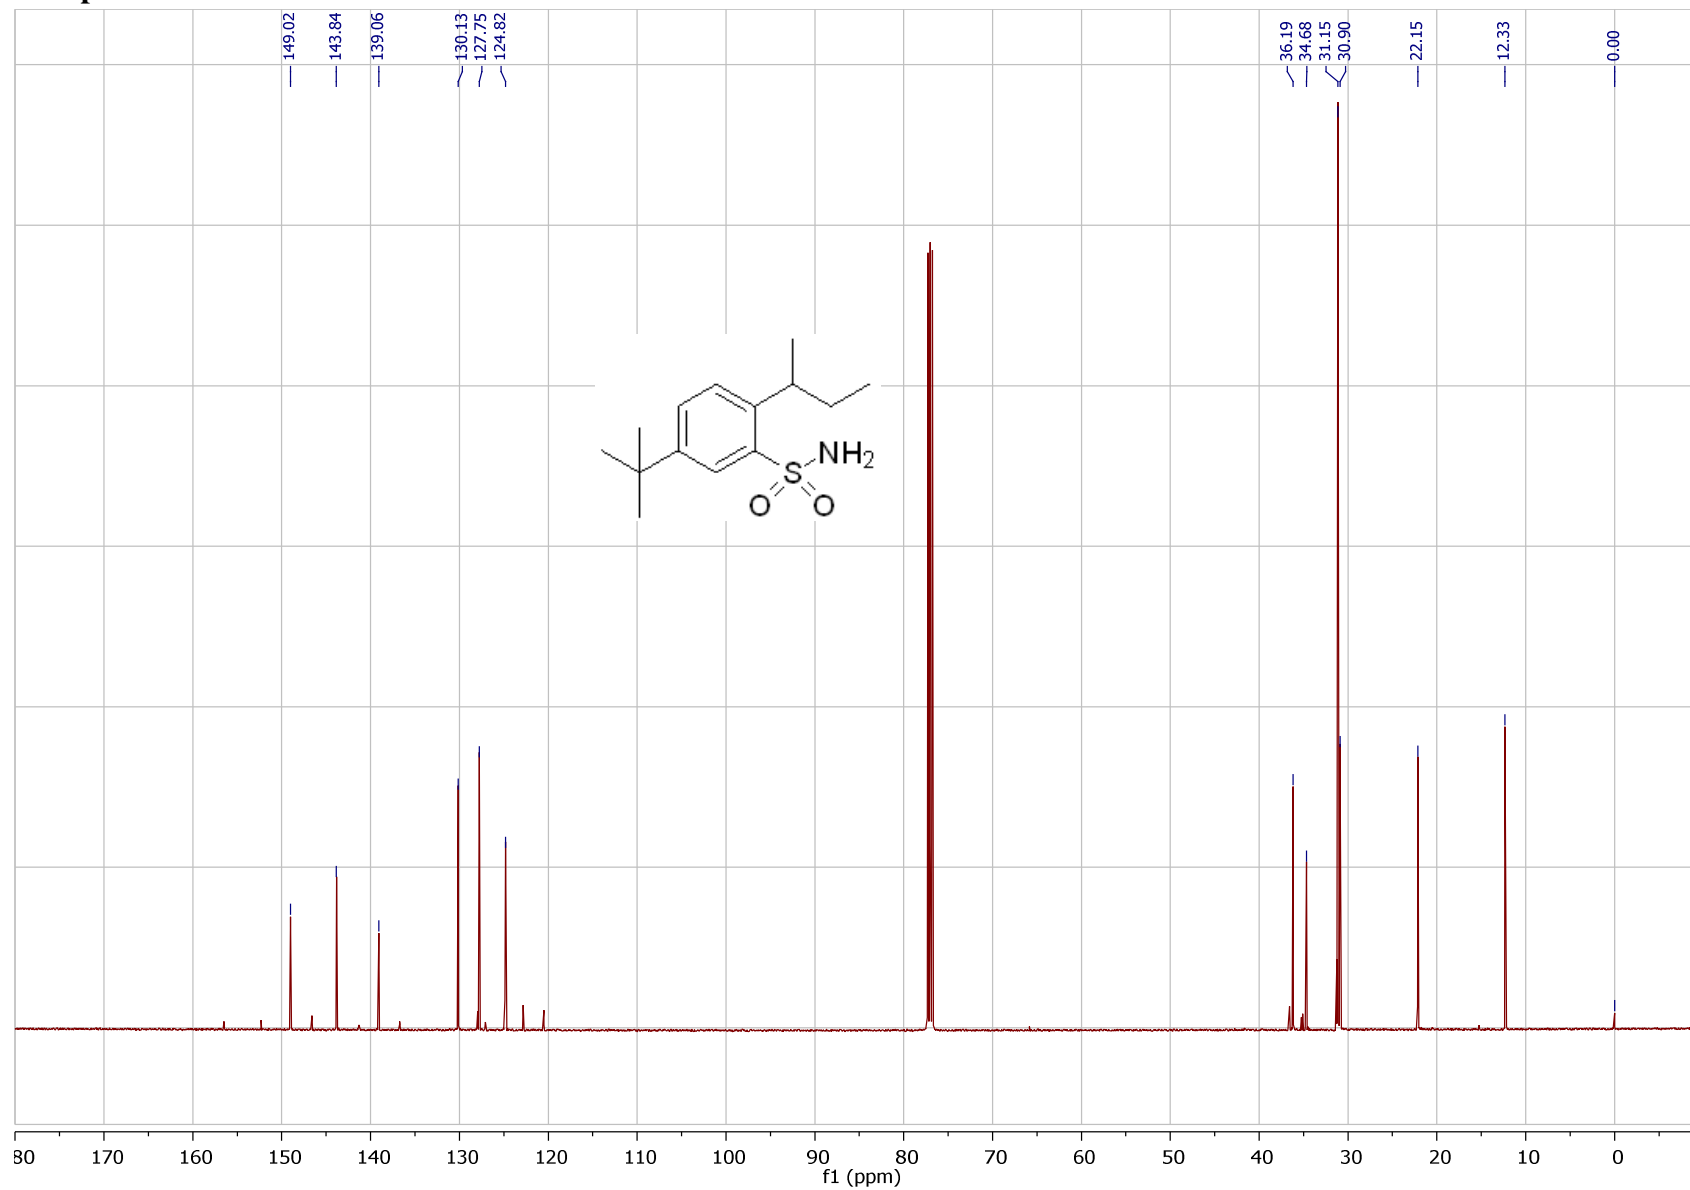

# Compound 9

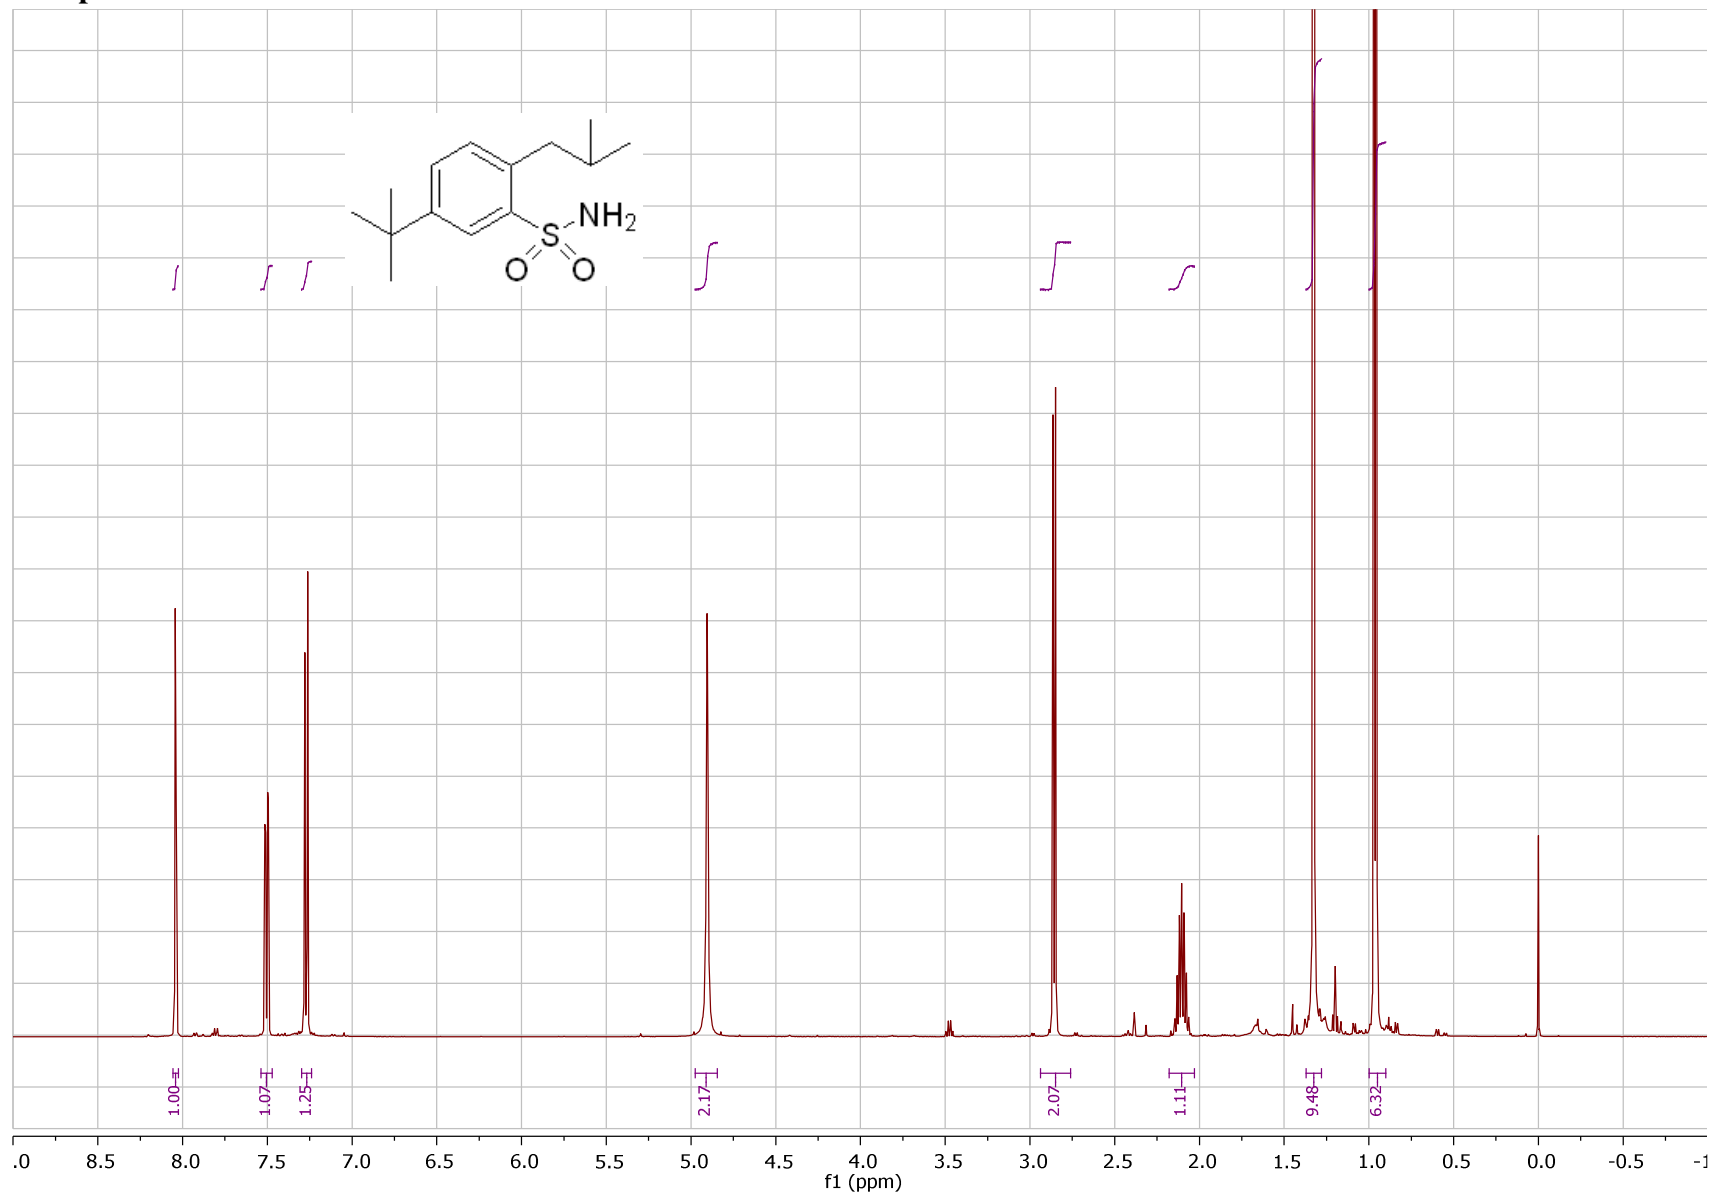

# Compound 9

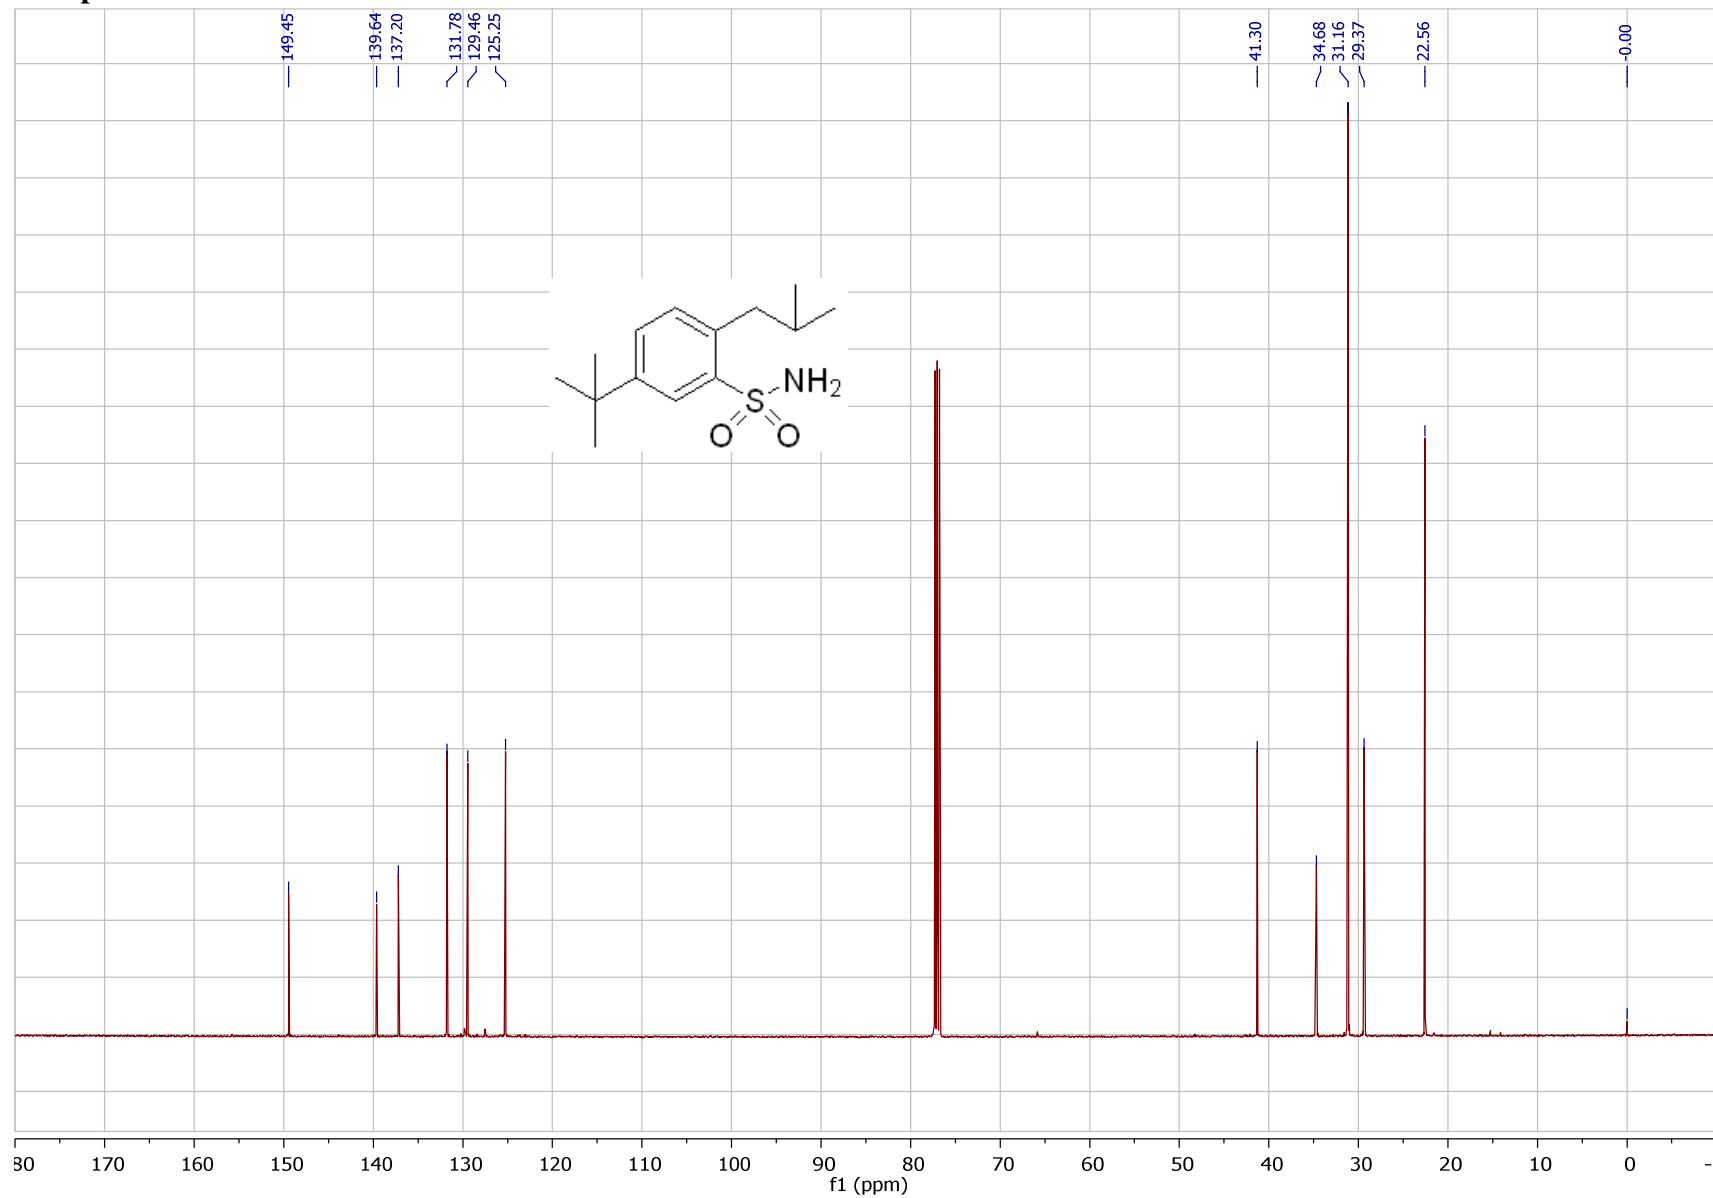

S2-37

# Compound 10

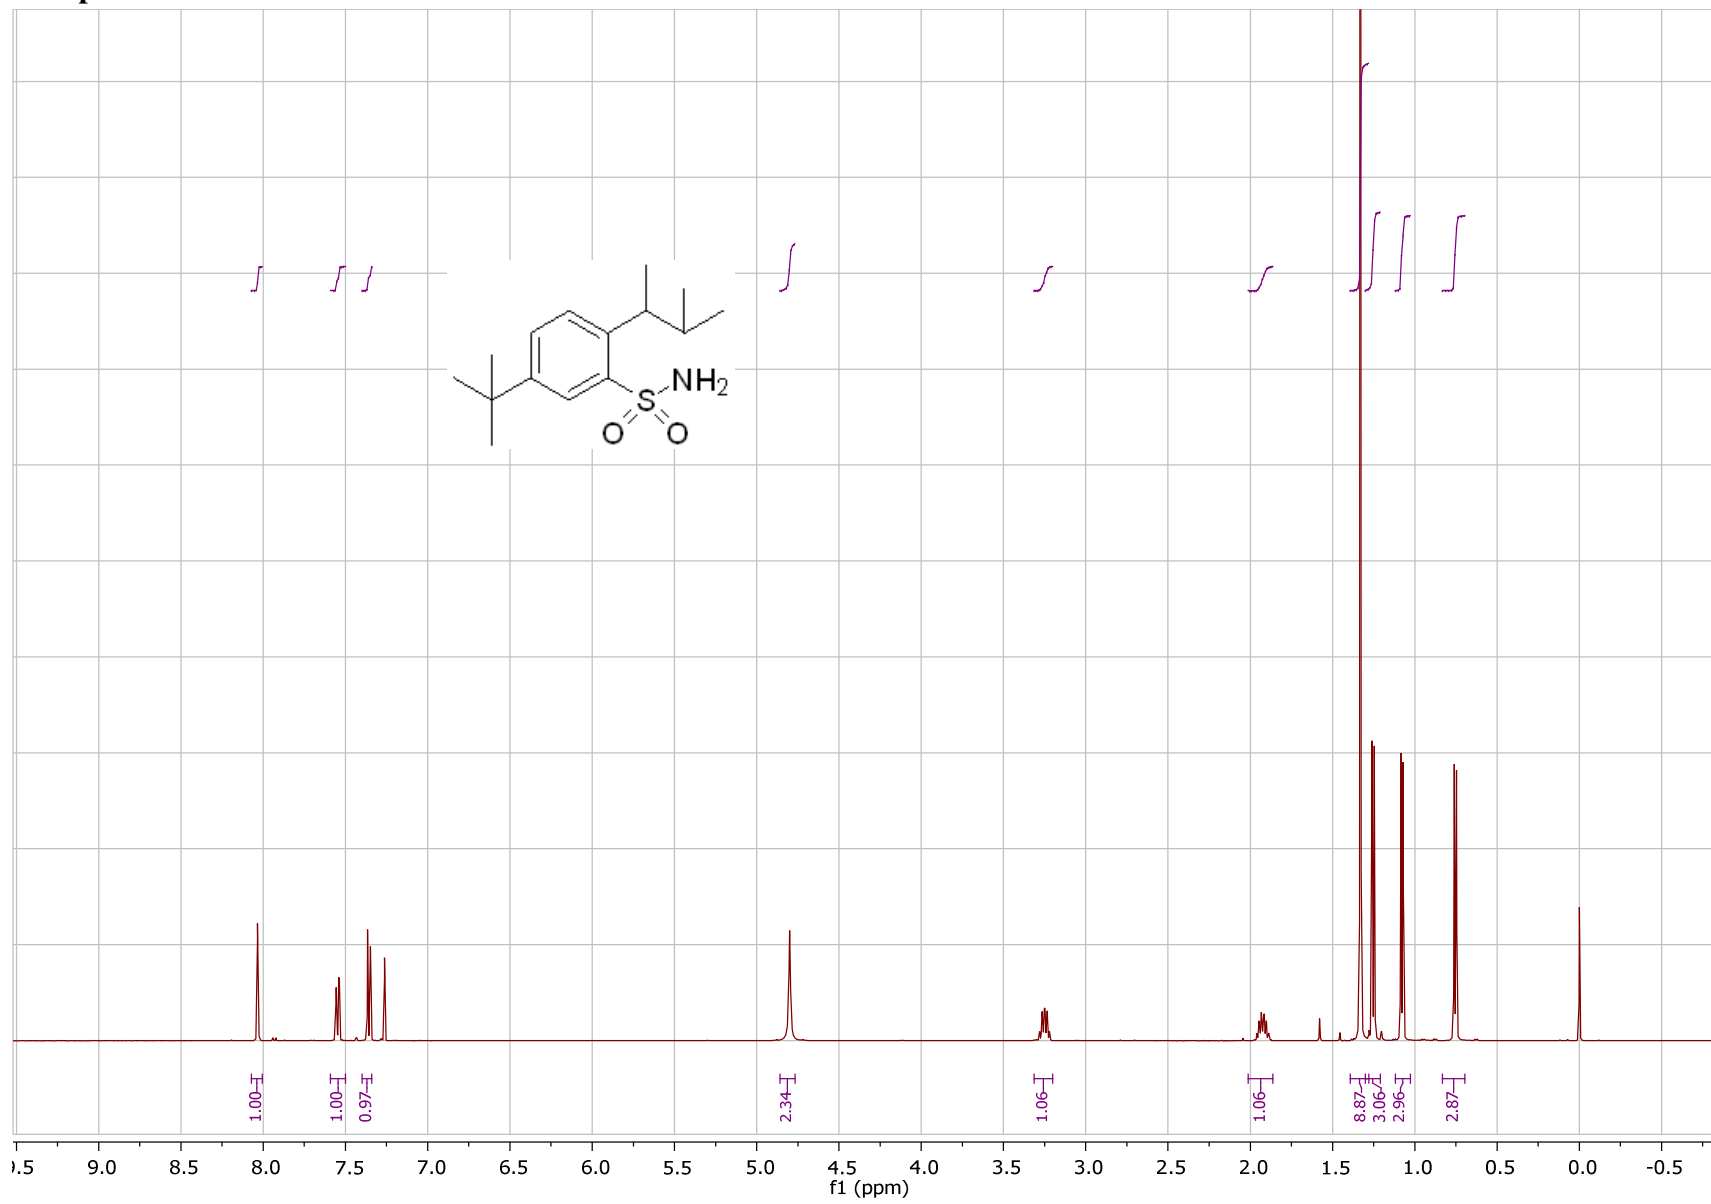

# Compound 10

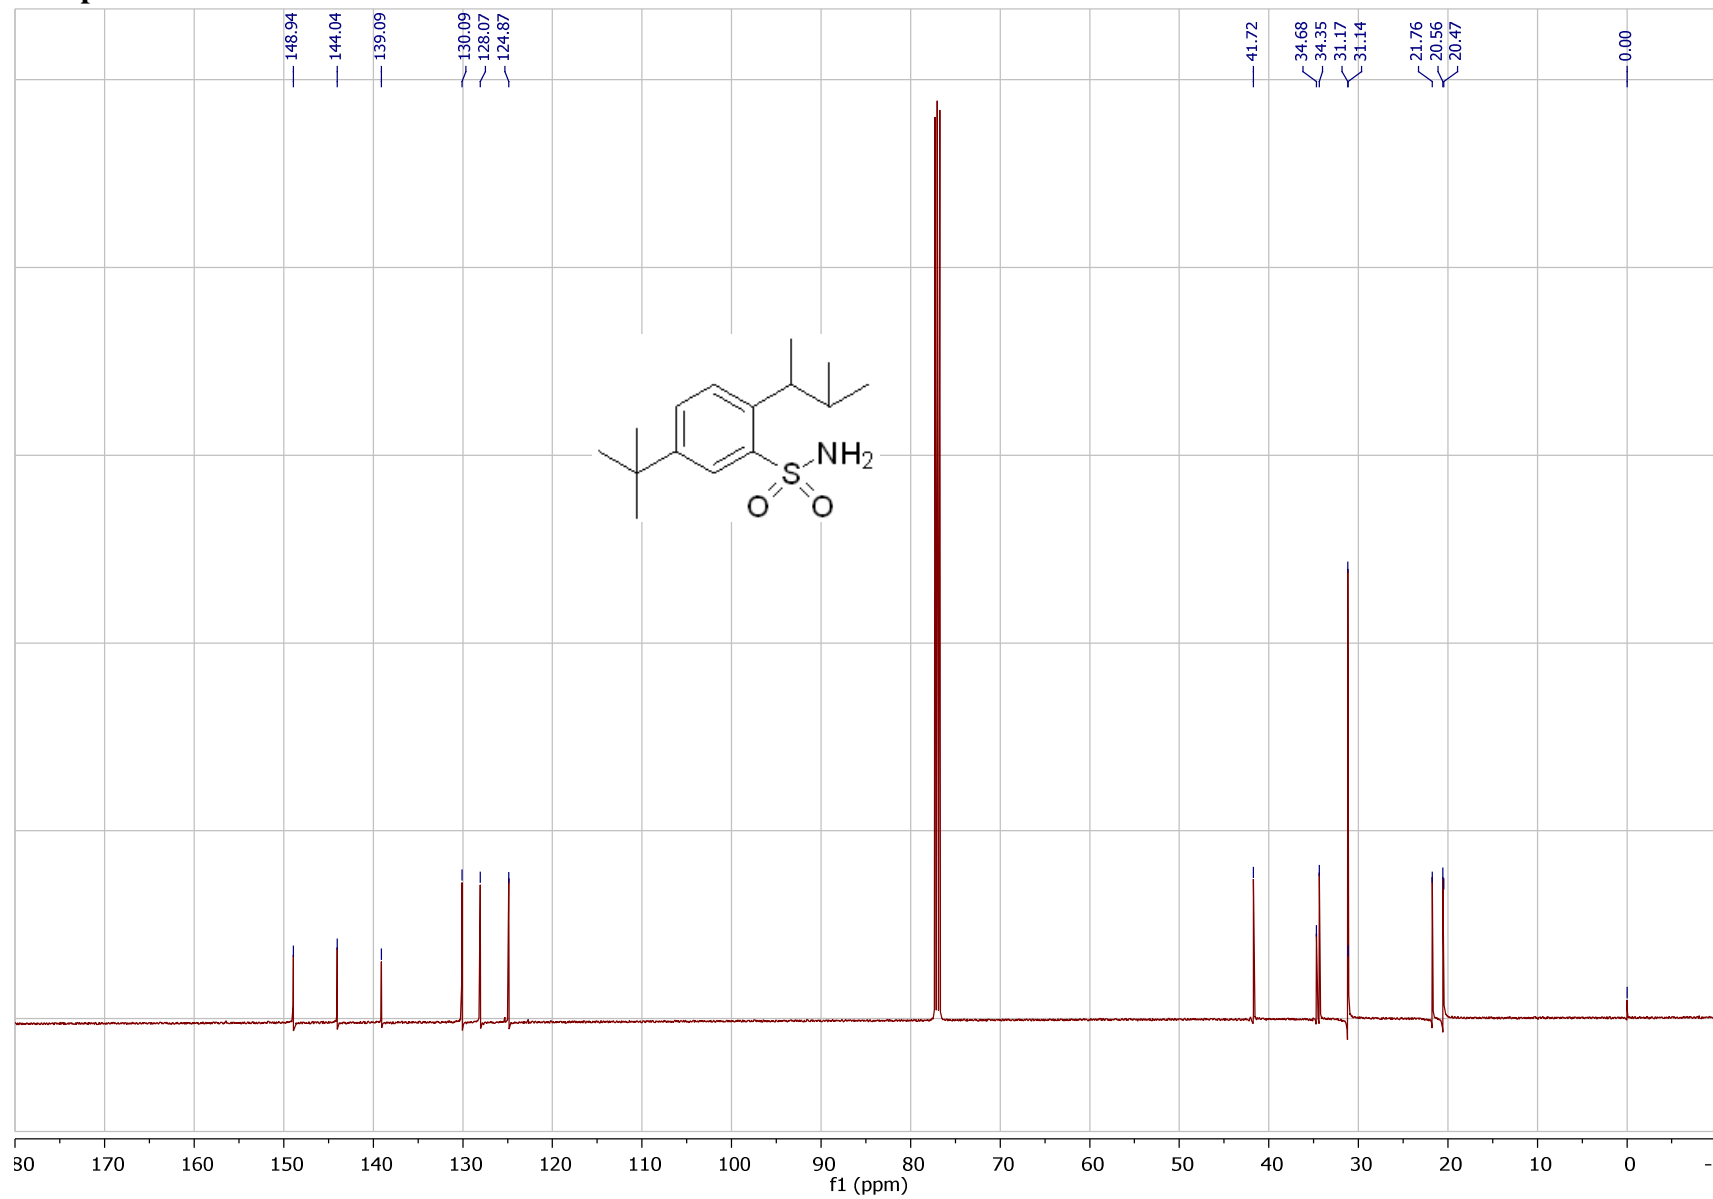

# Compound 11

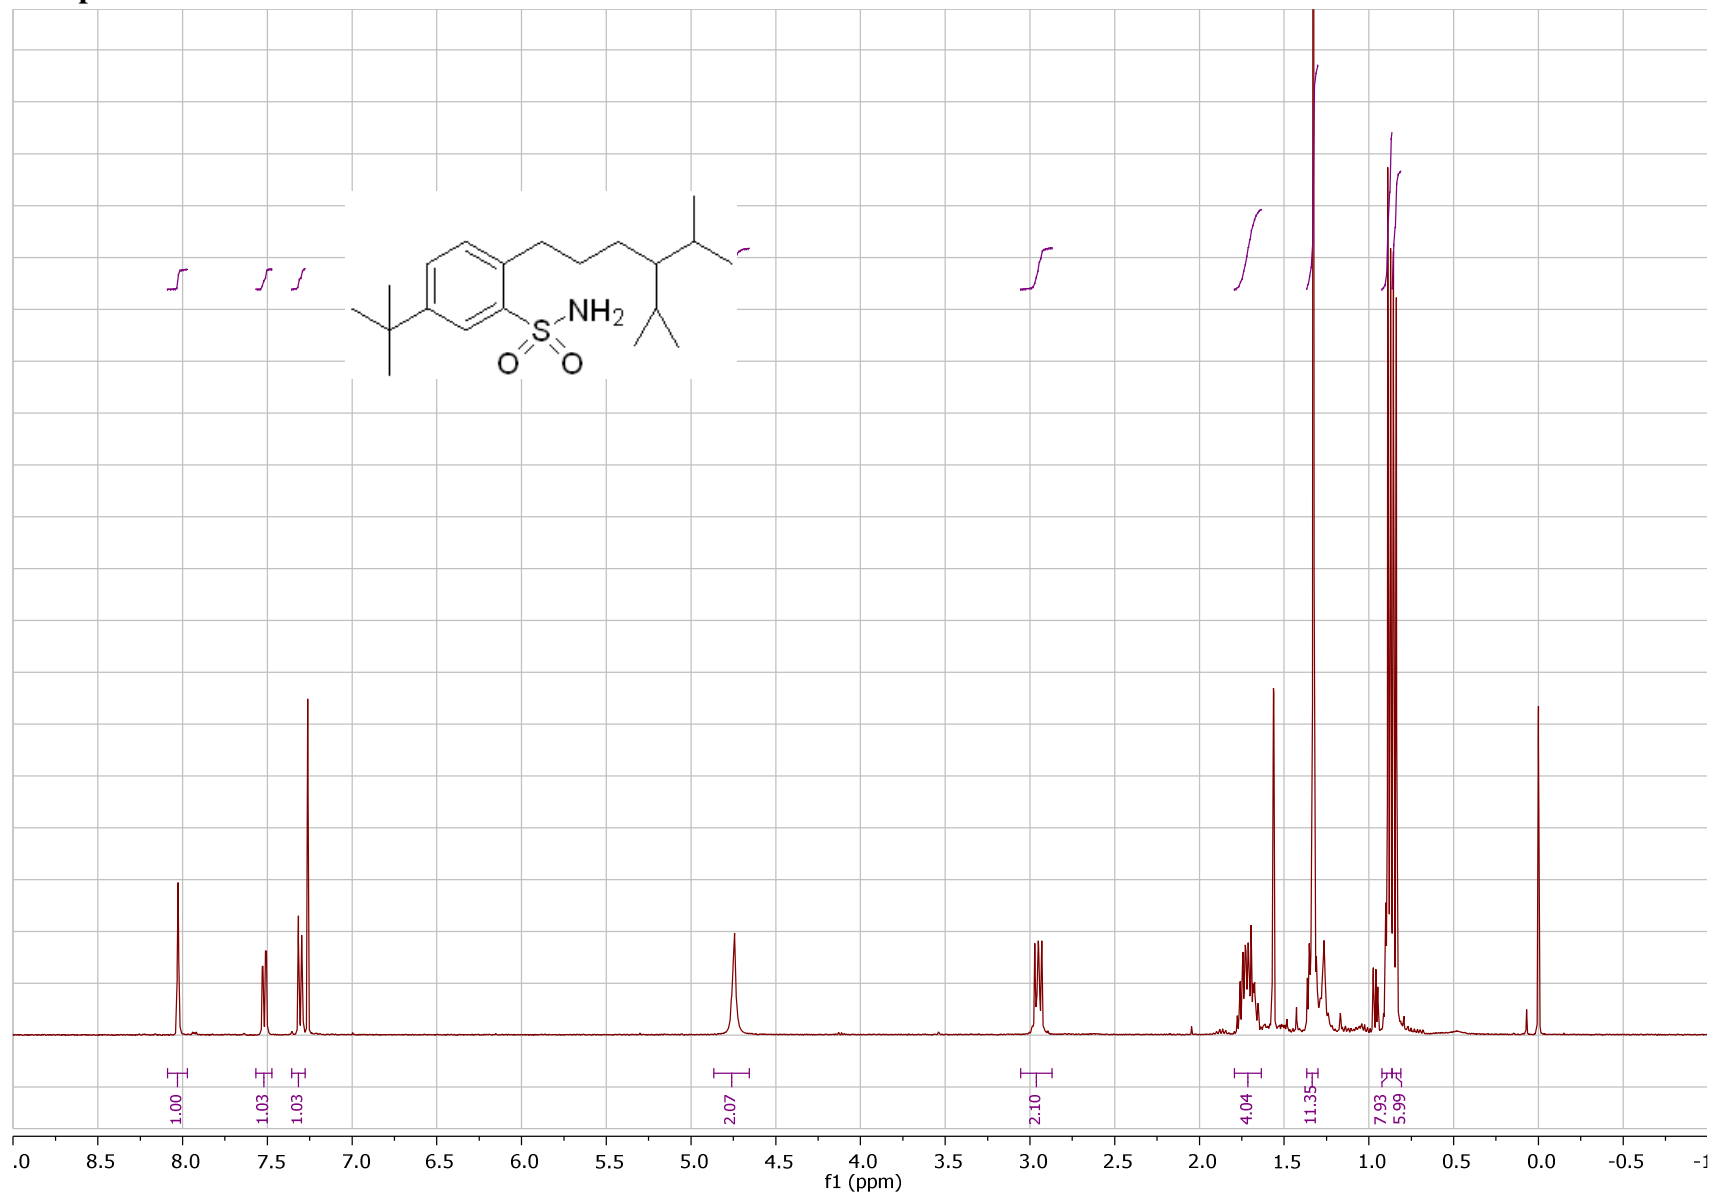

### Compound 11

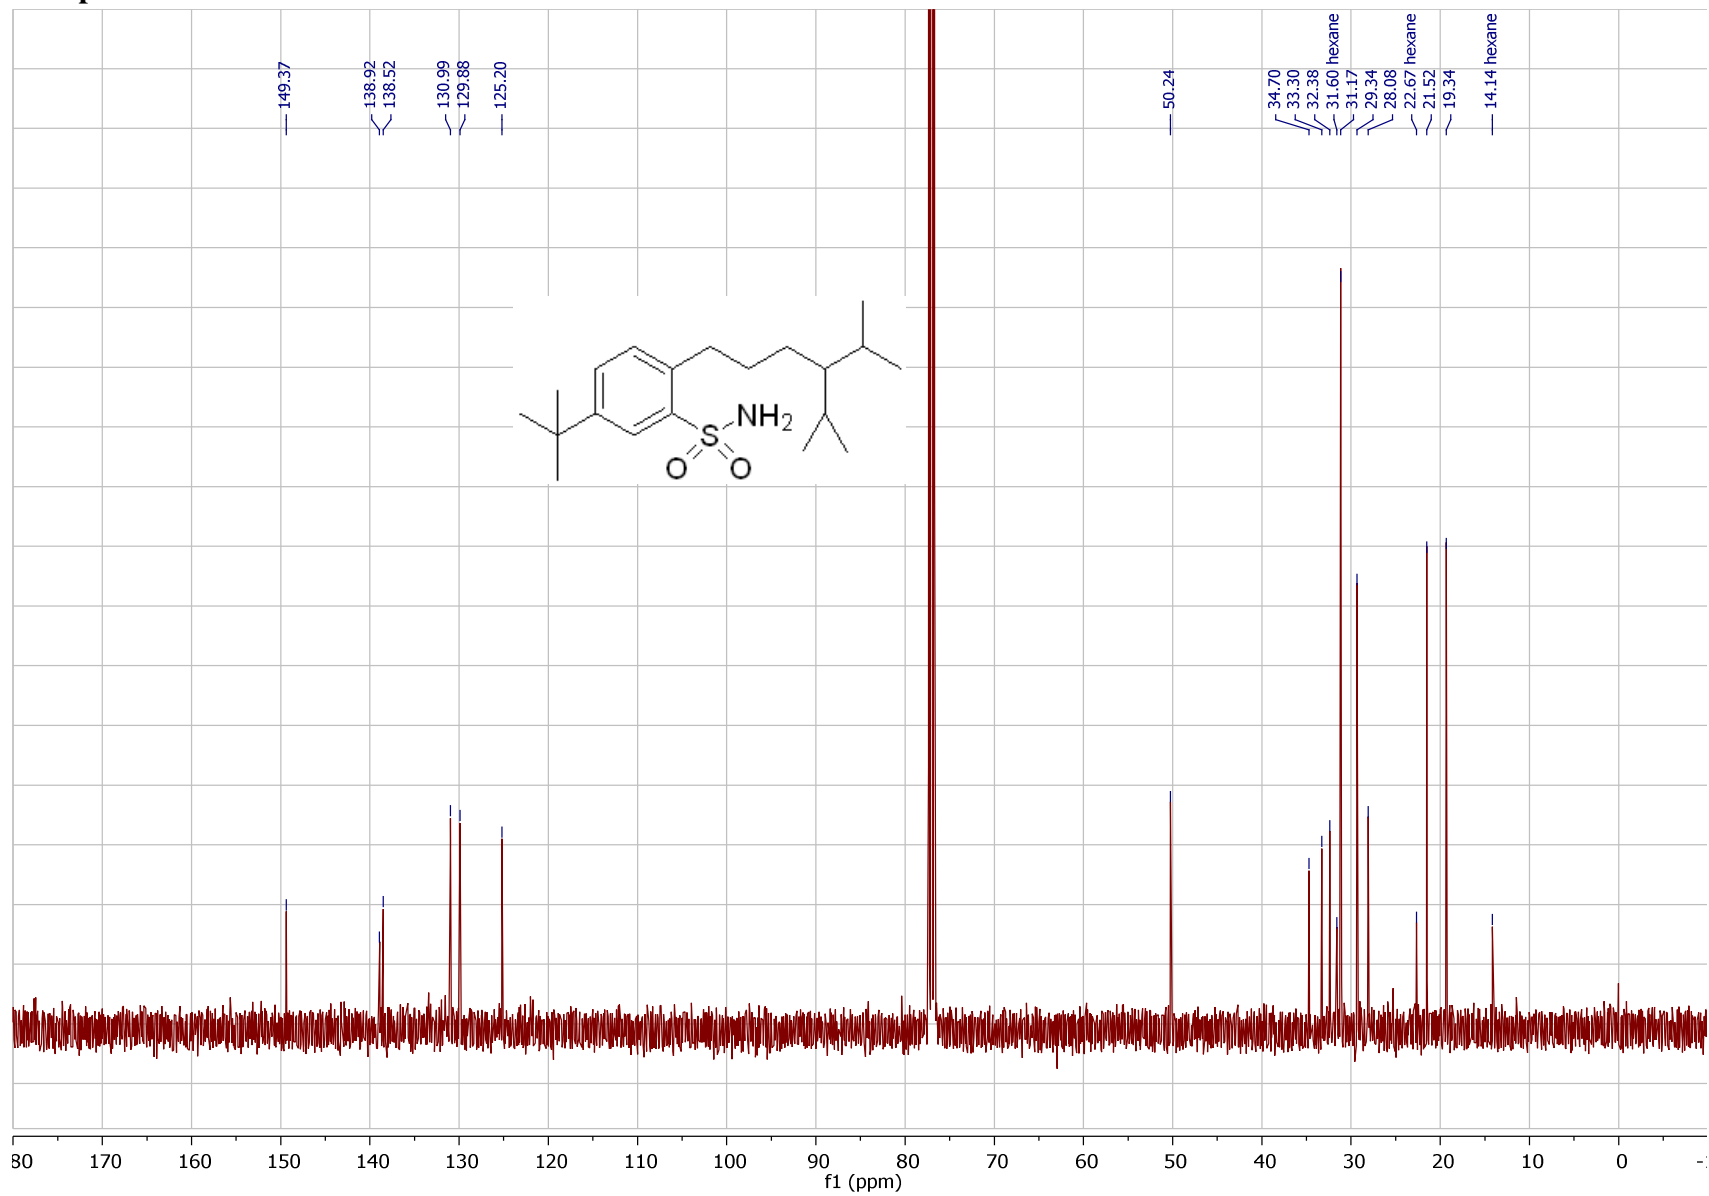

# Compound 12

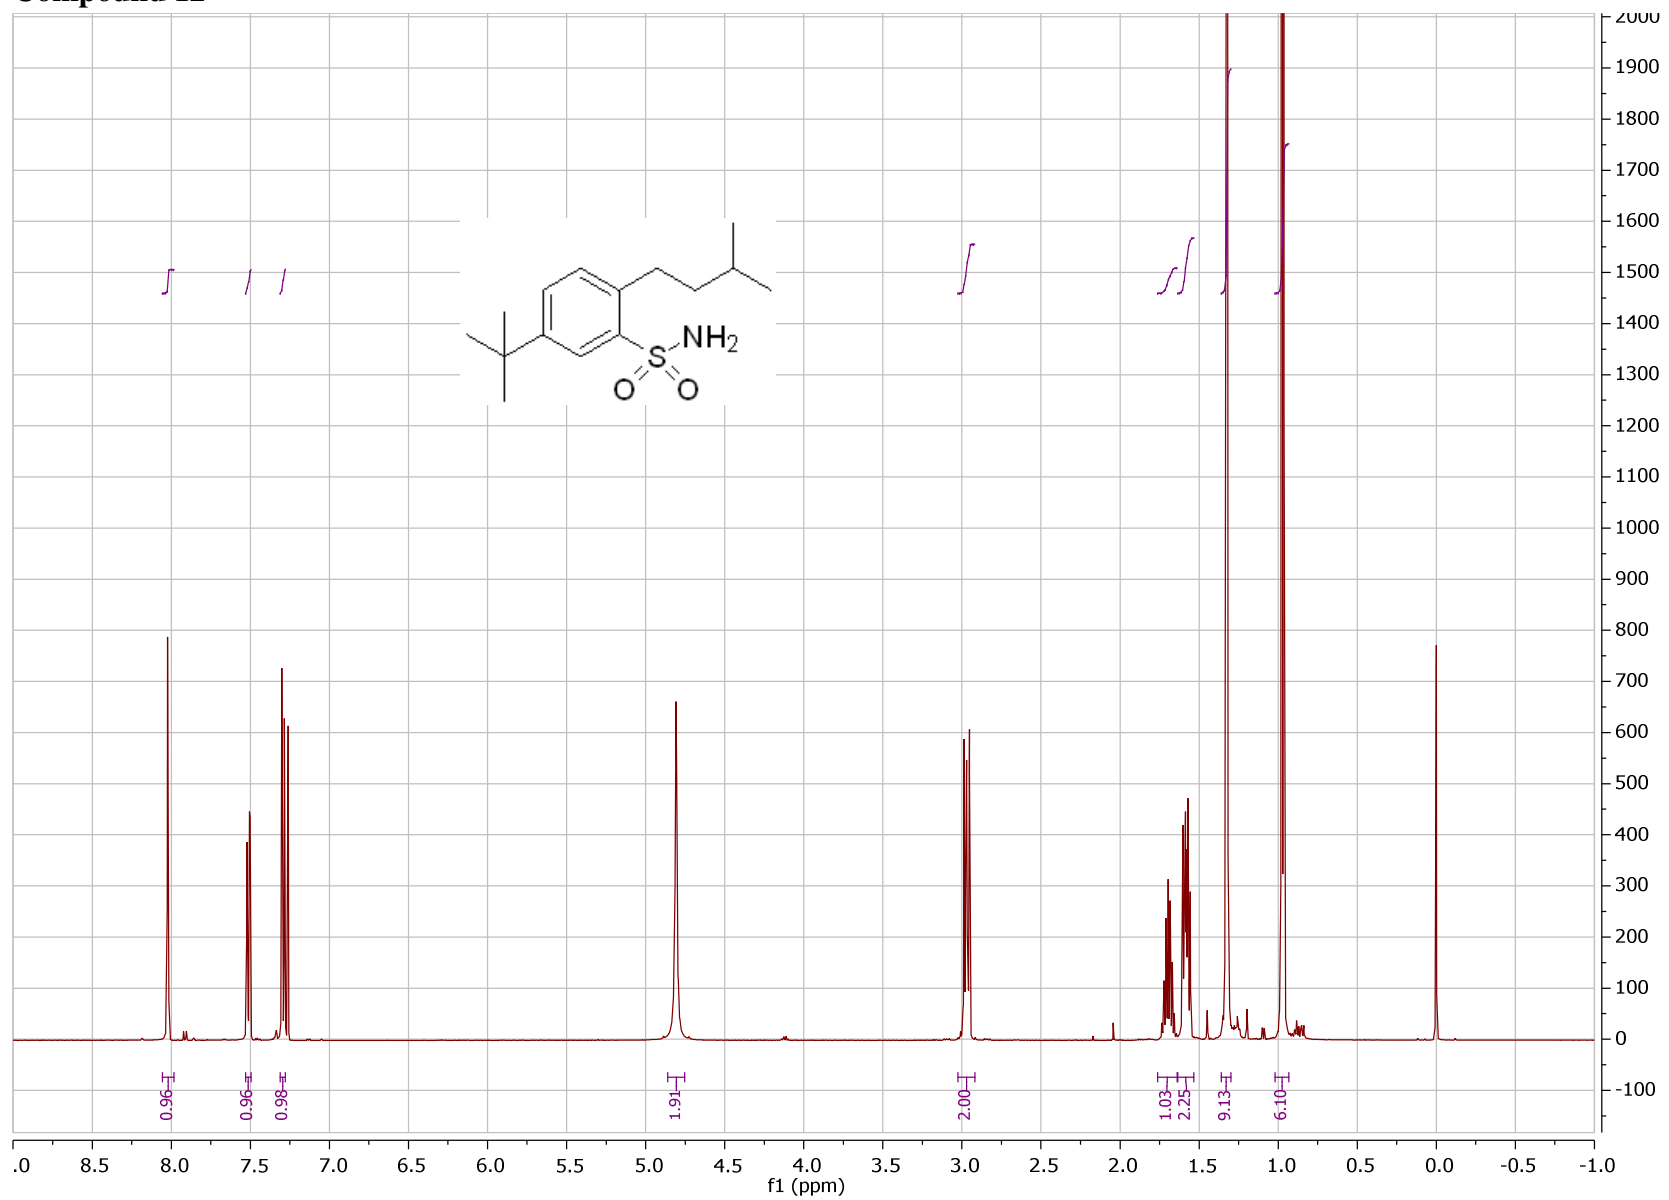

# Compound 12

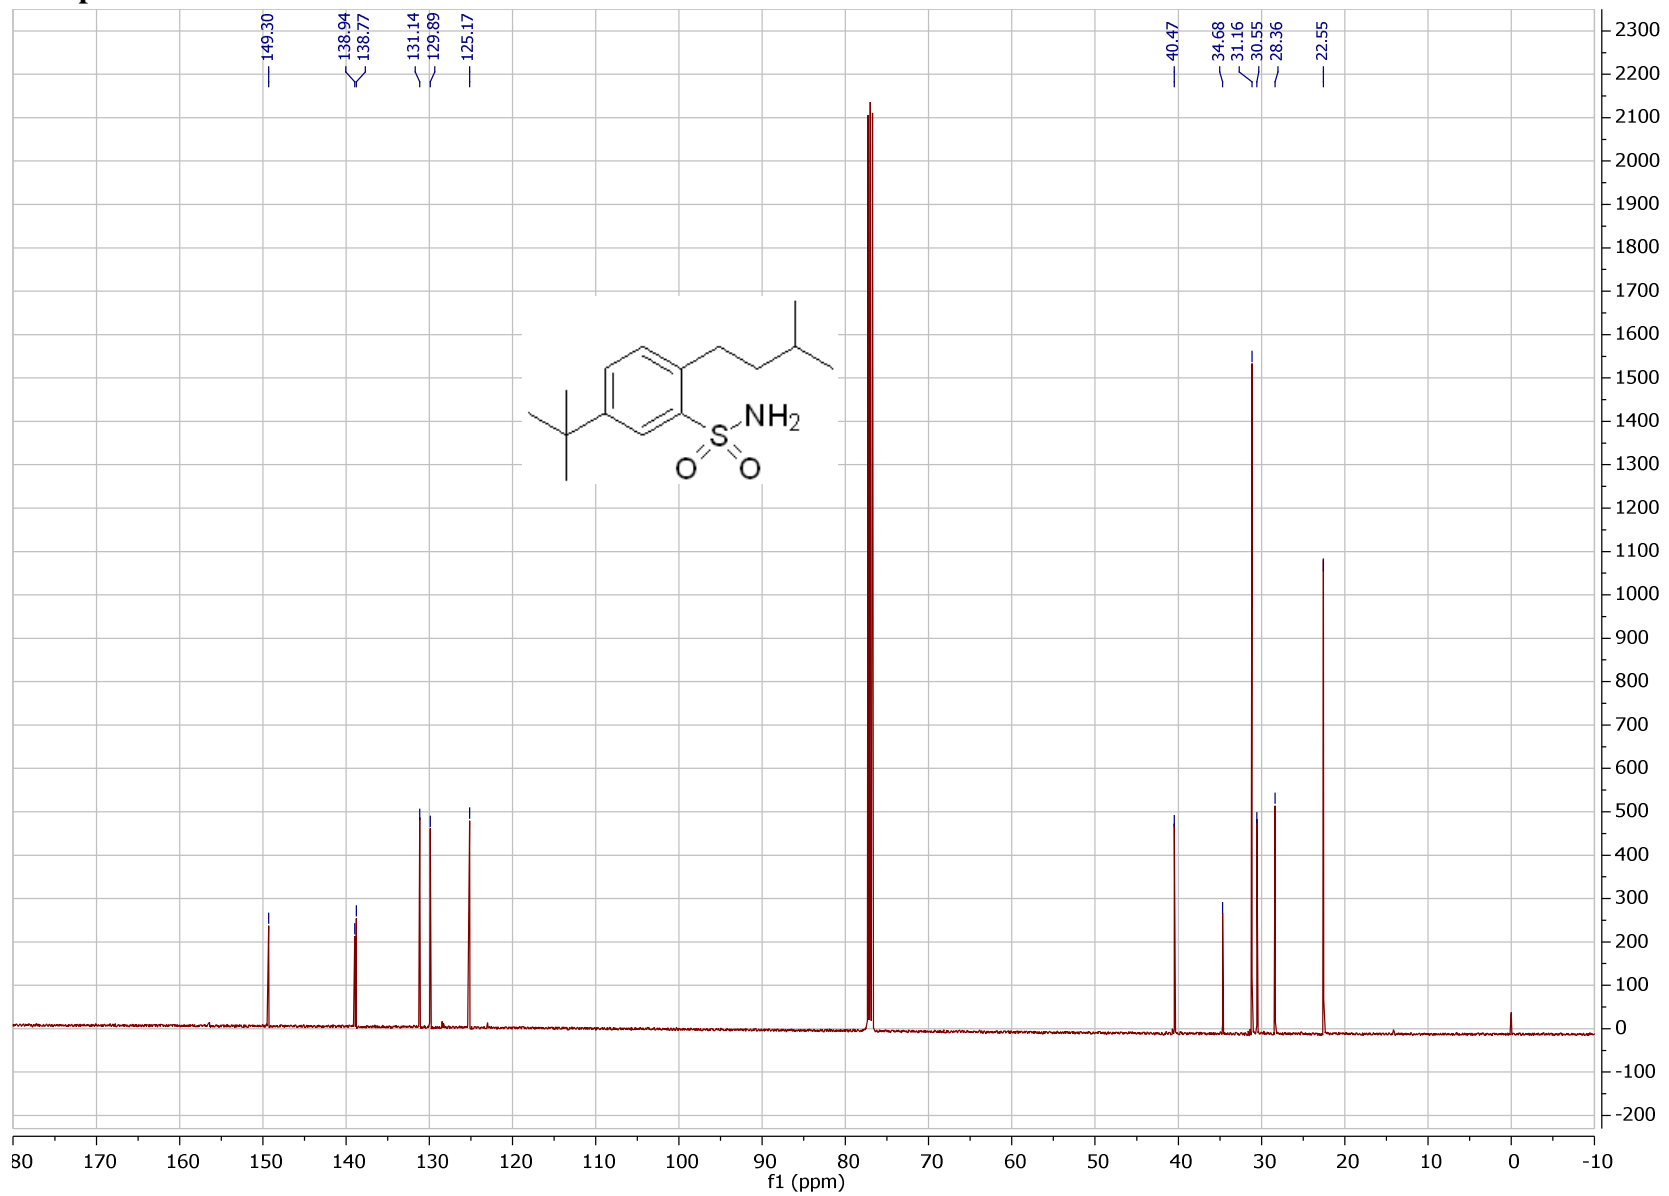

Compound 13

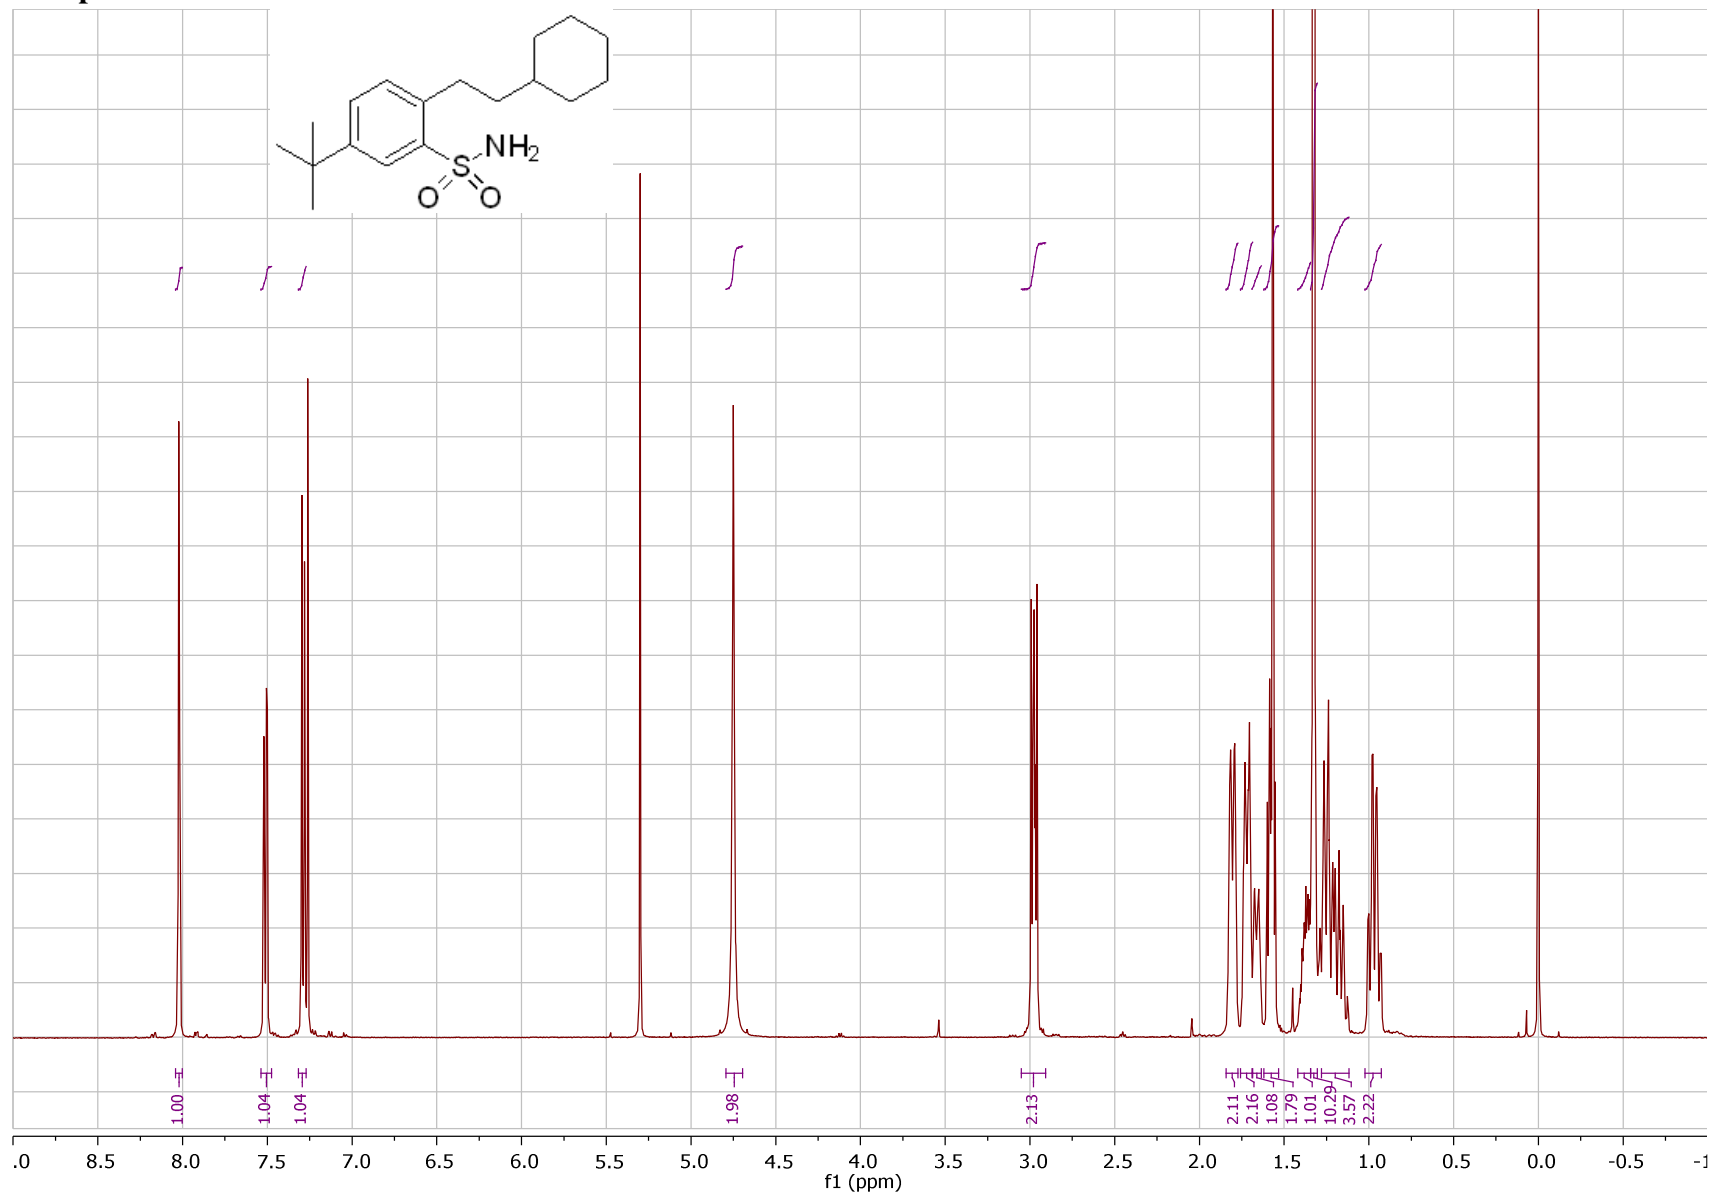

# Compound 13

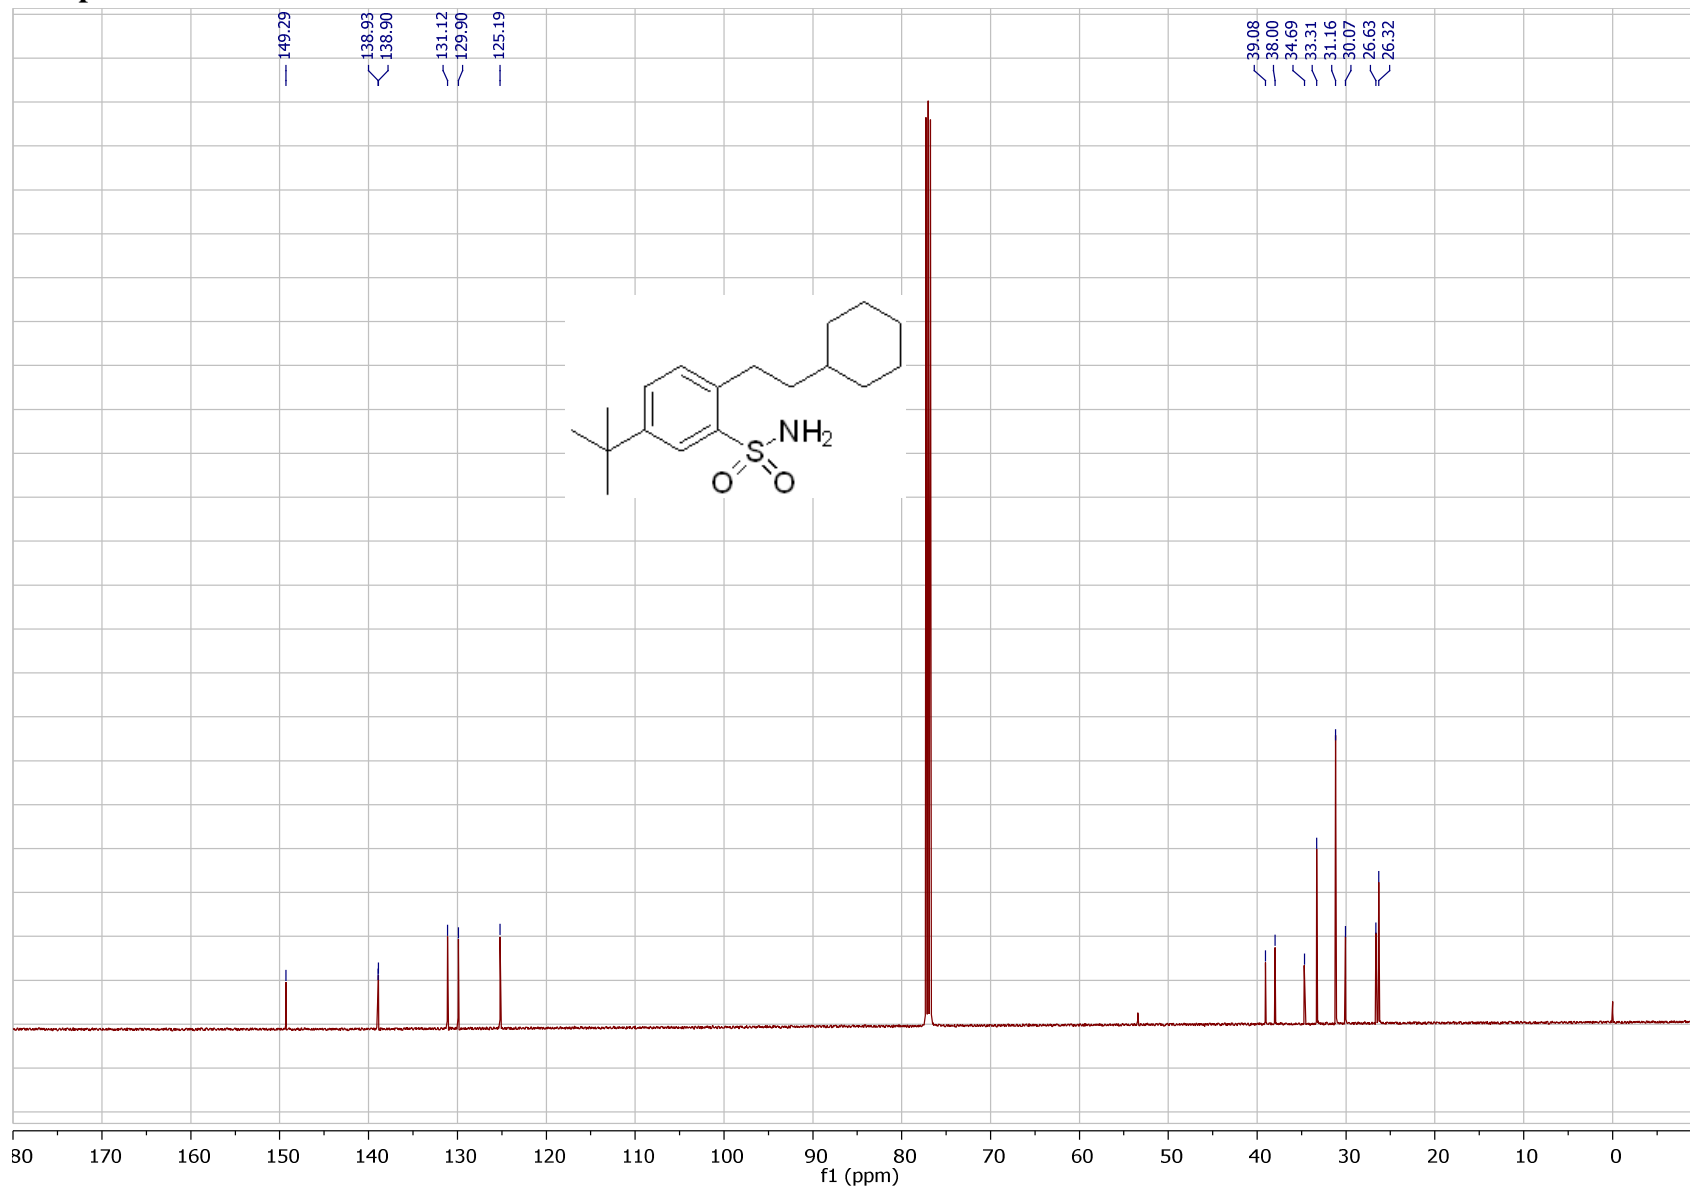

# Compound 14

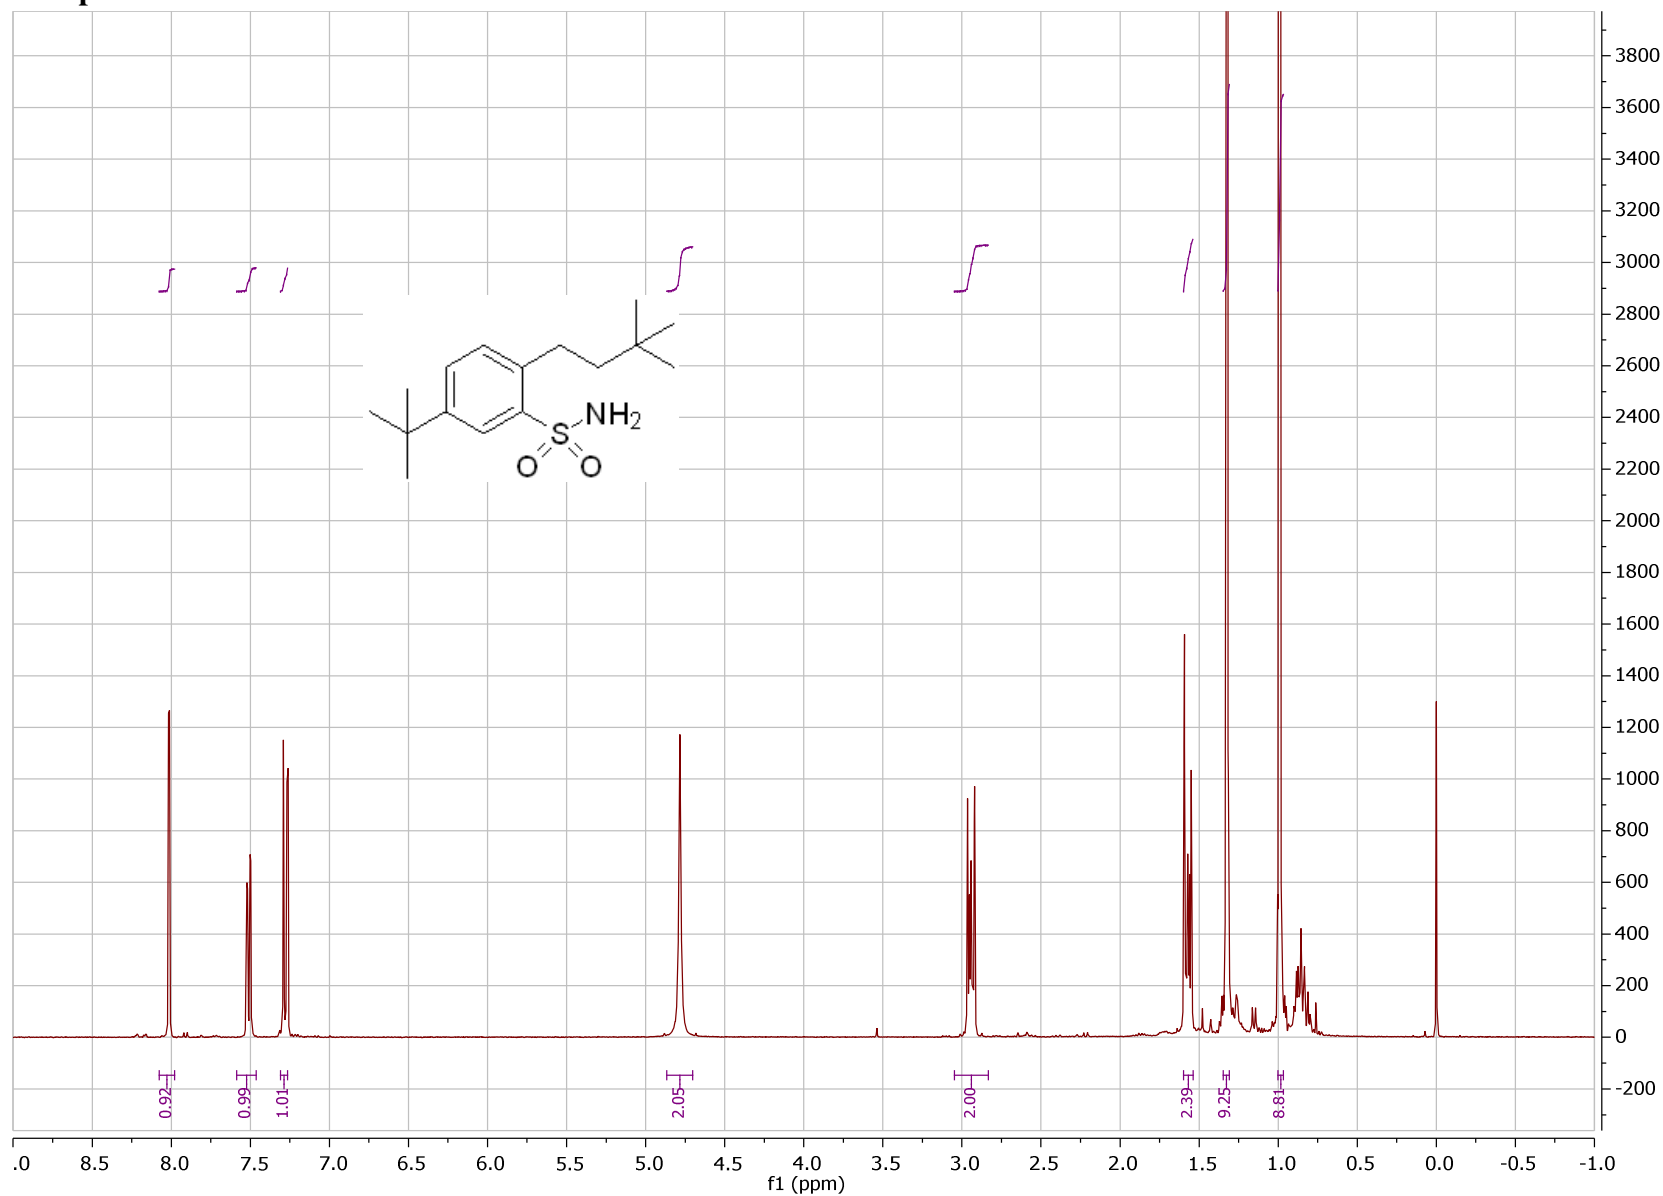

# Compound 14

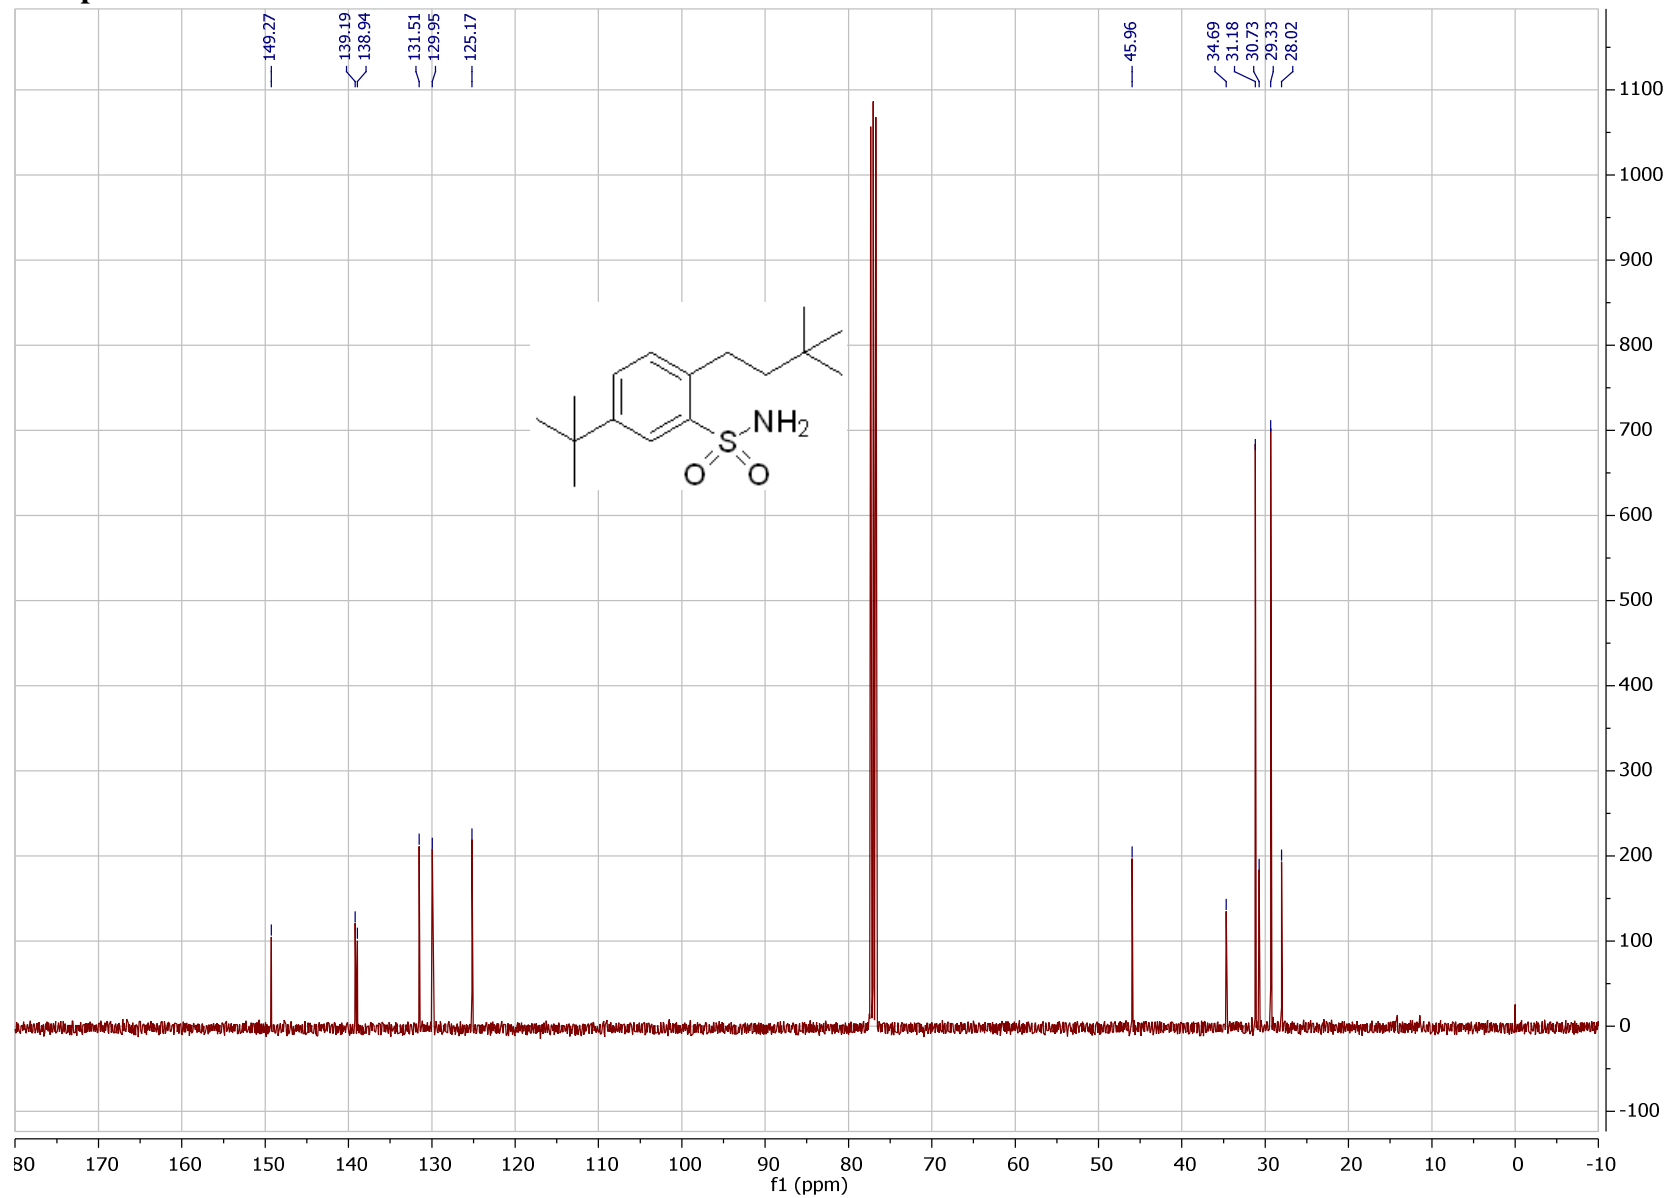

# Compound 15

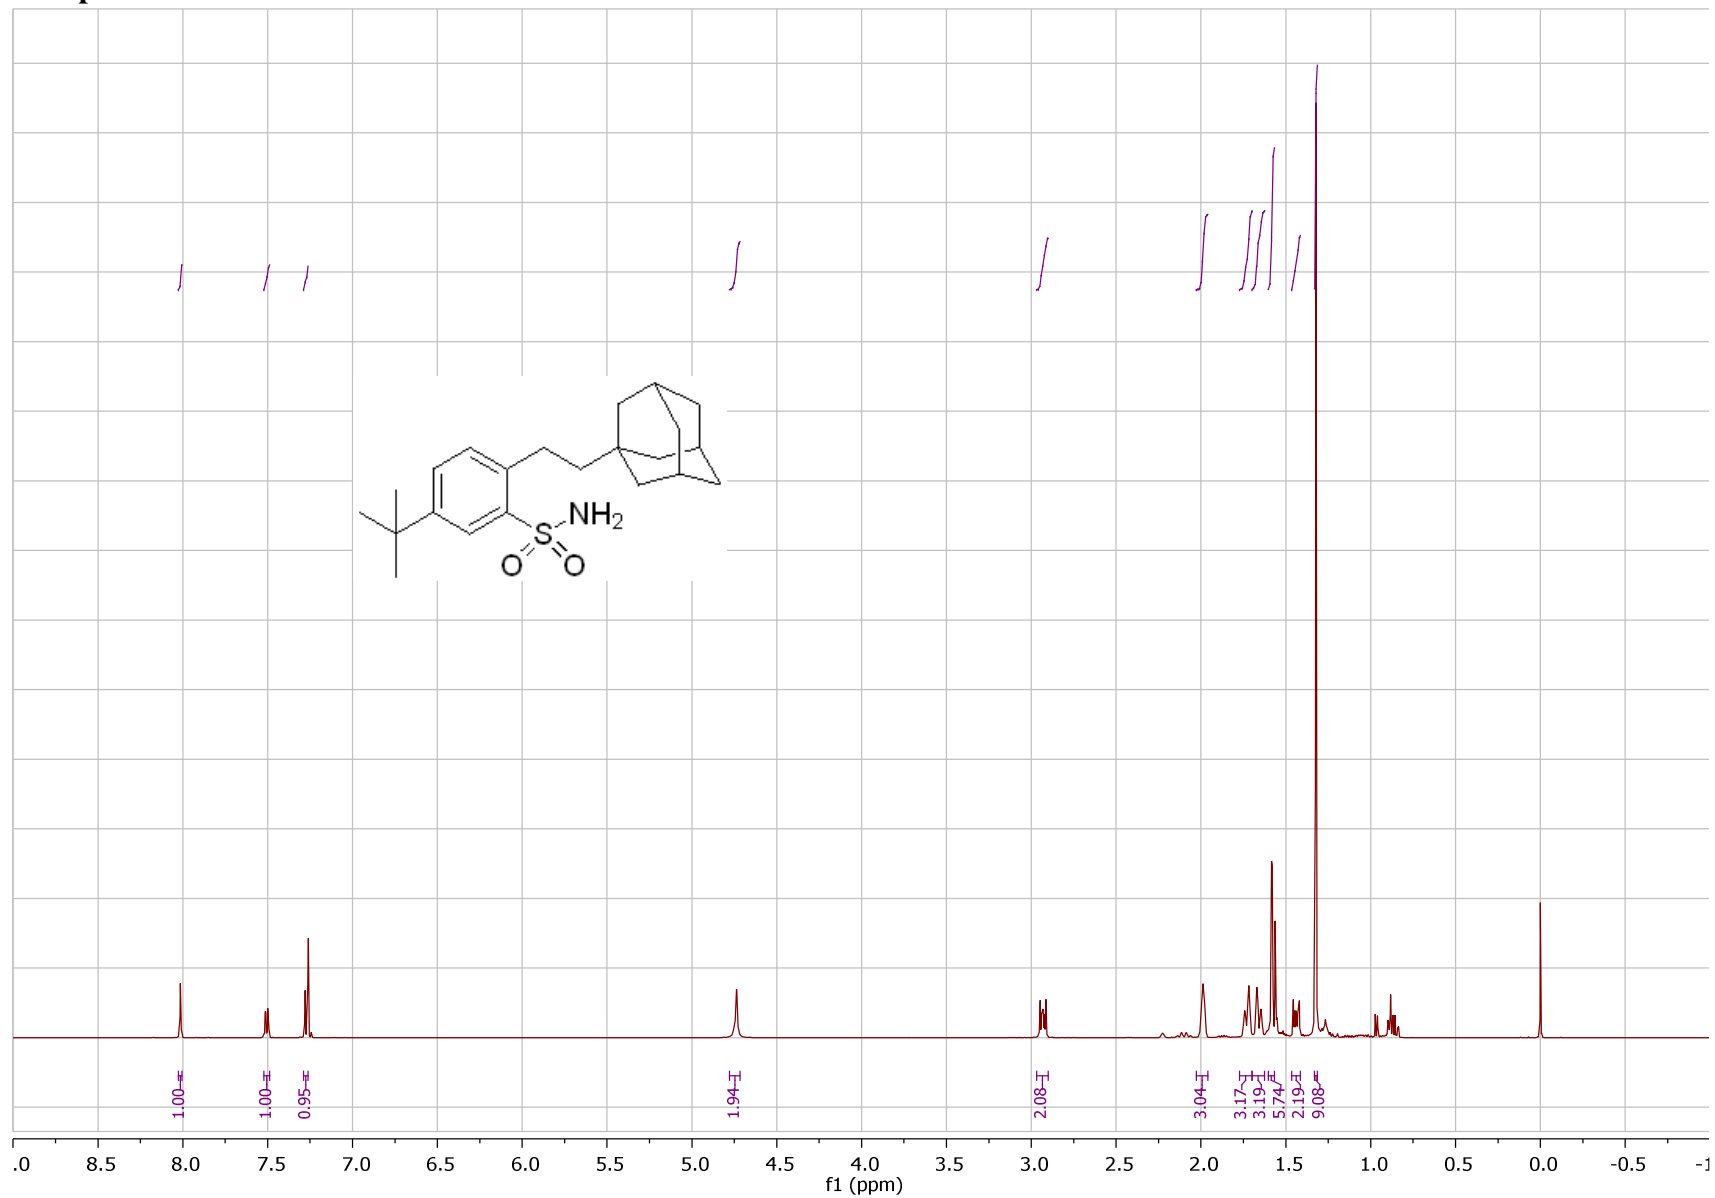

# Compound 15

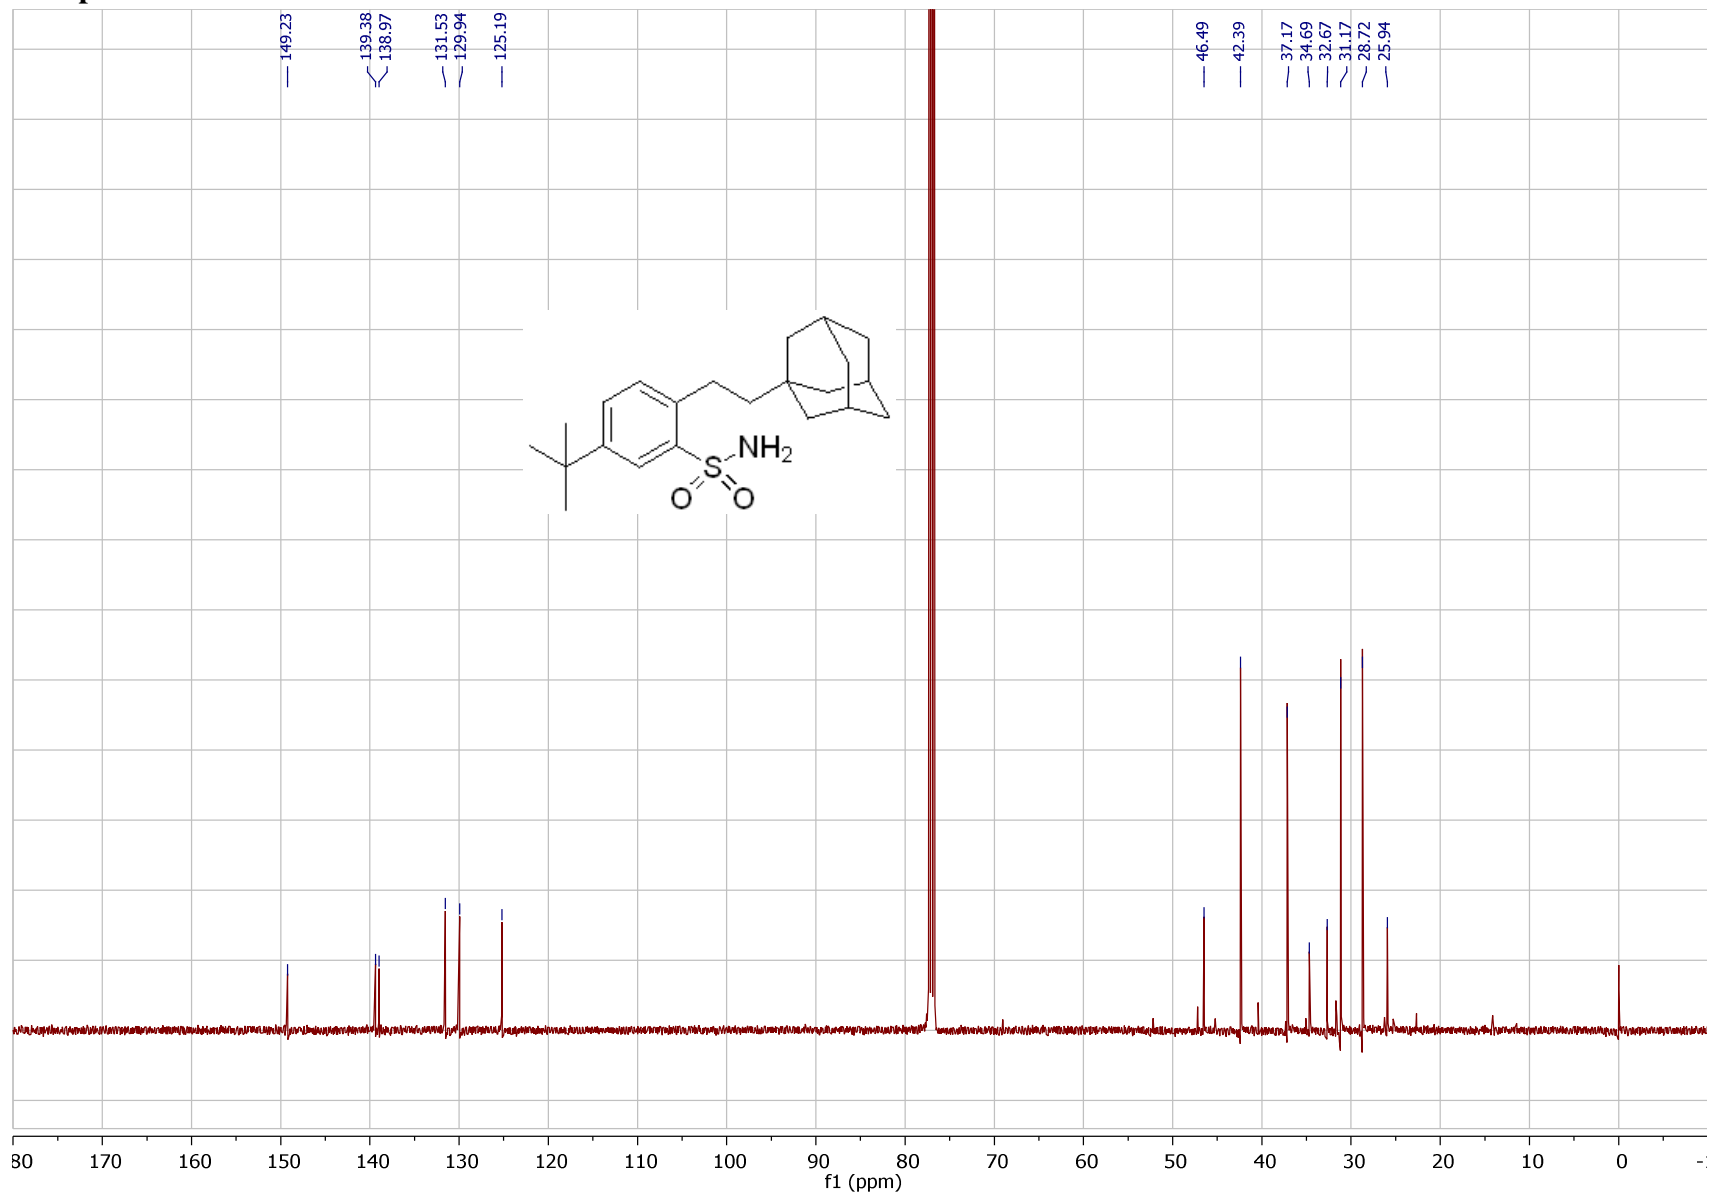

# Compound 16

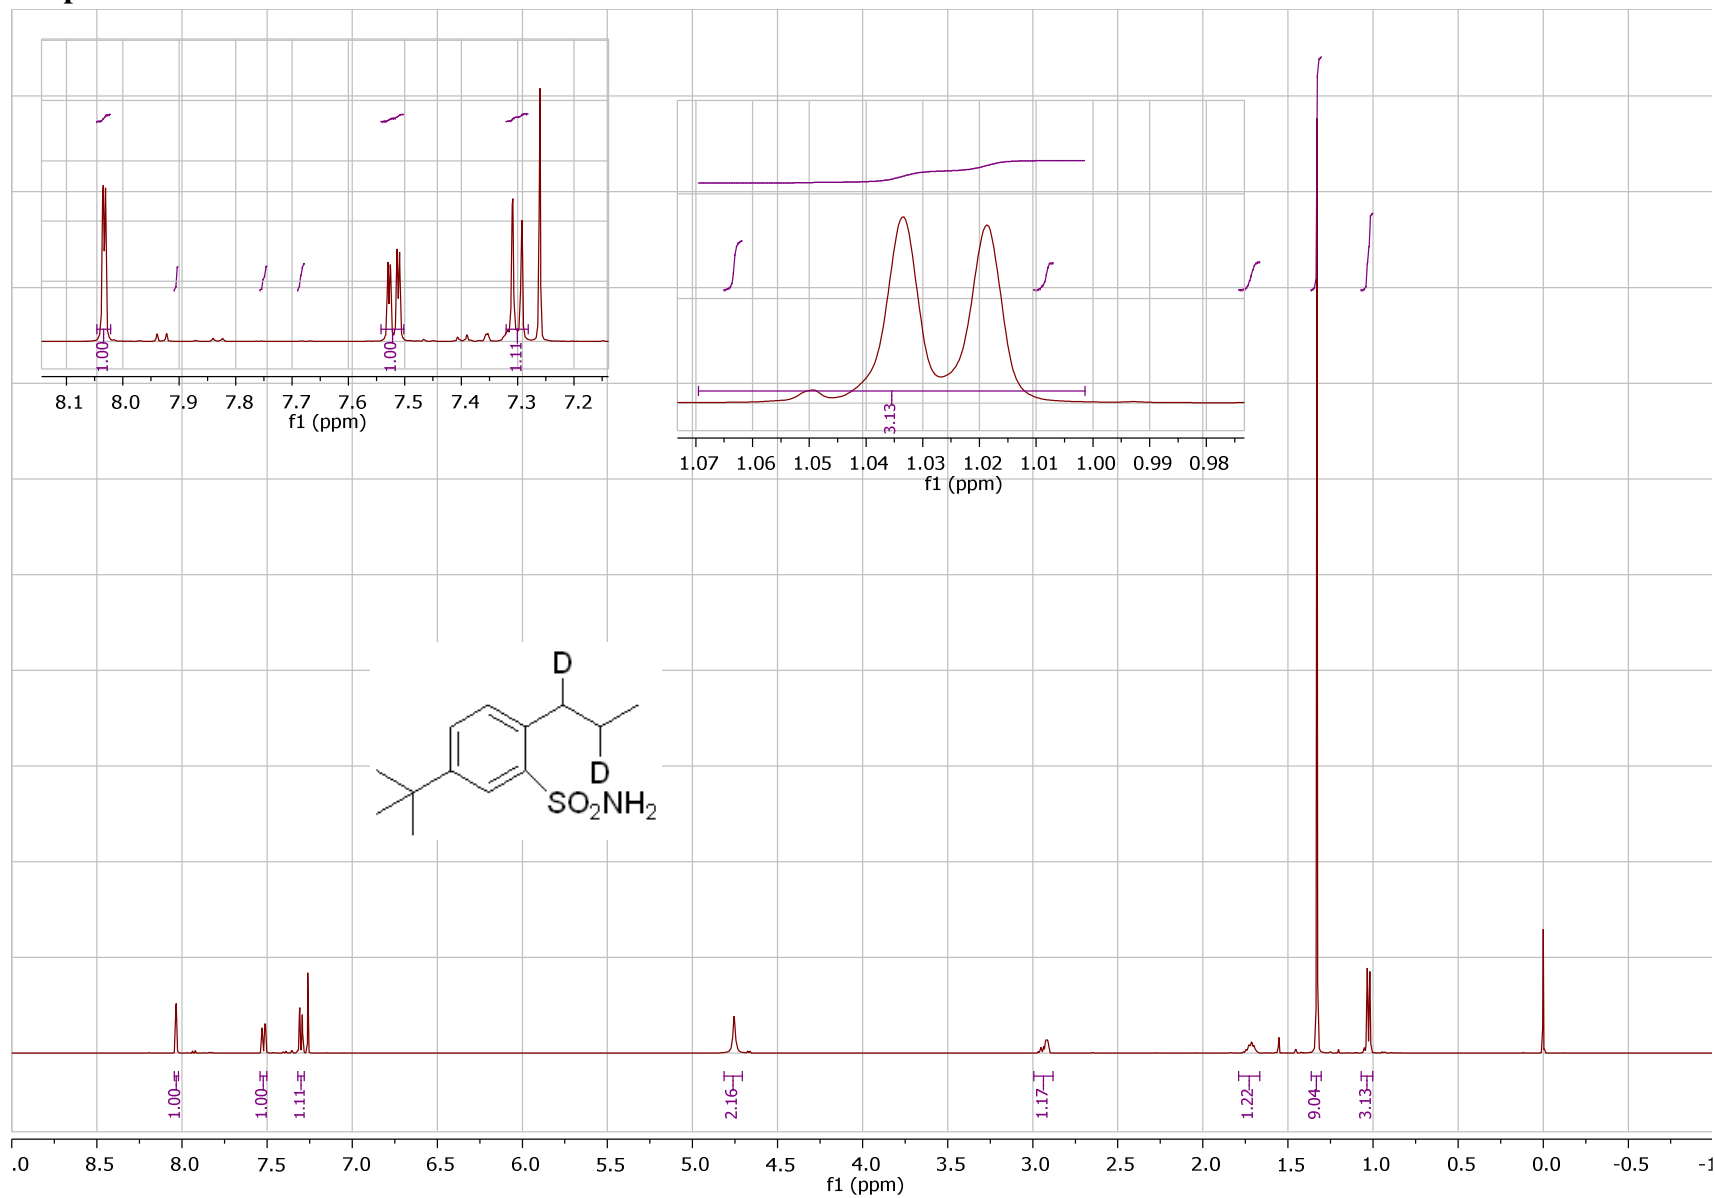

# Compound 16

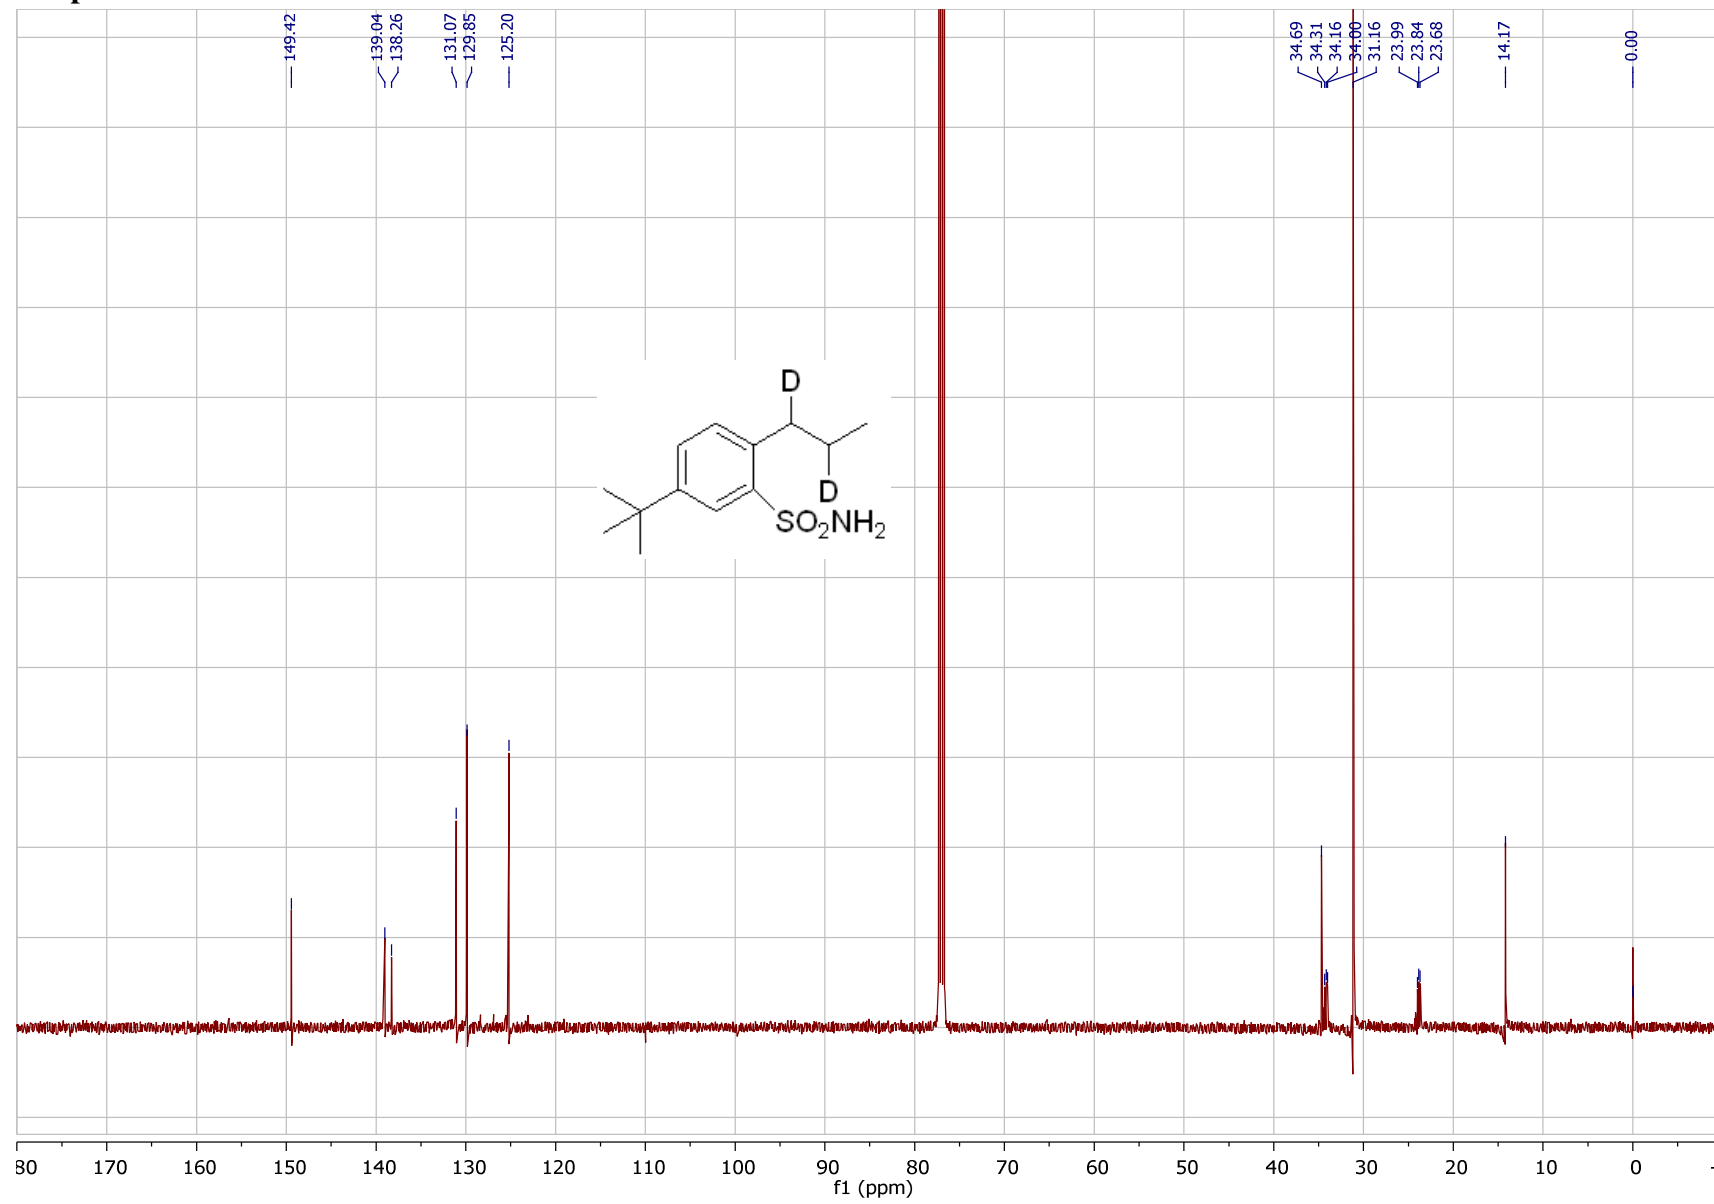

Compound 1a

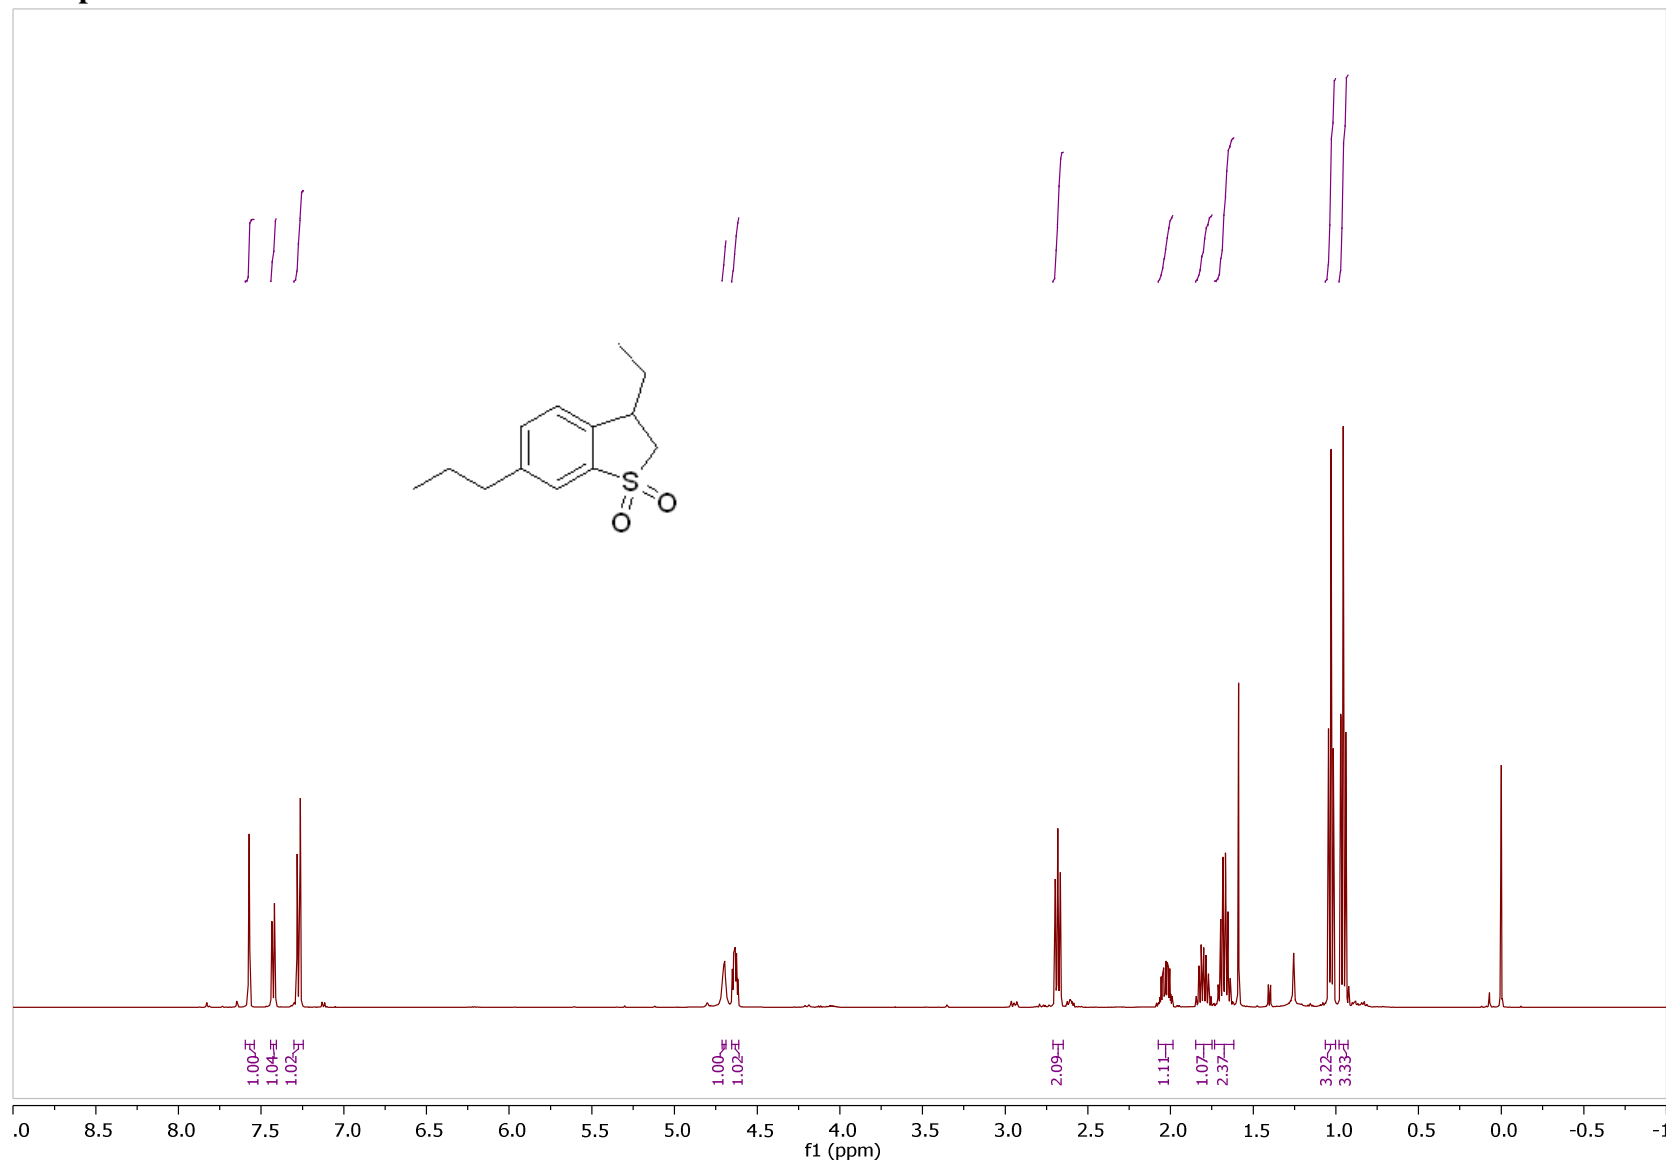

# Compound 1a

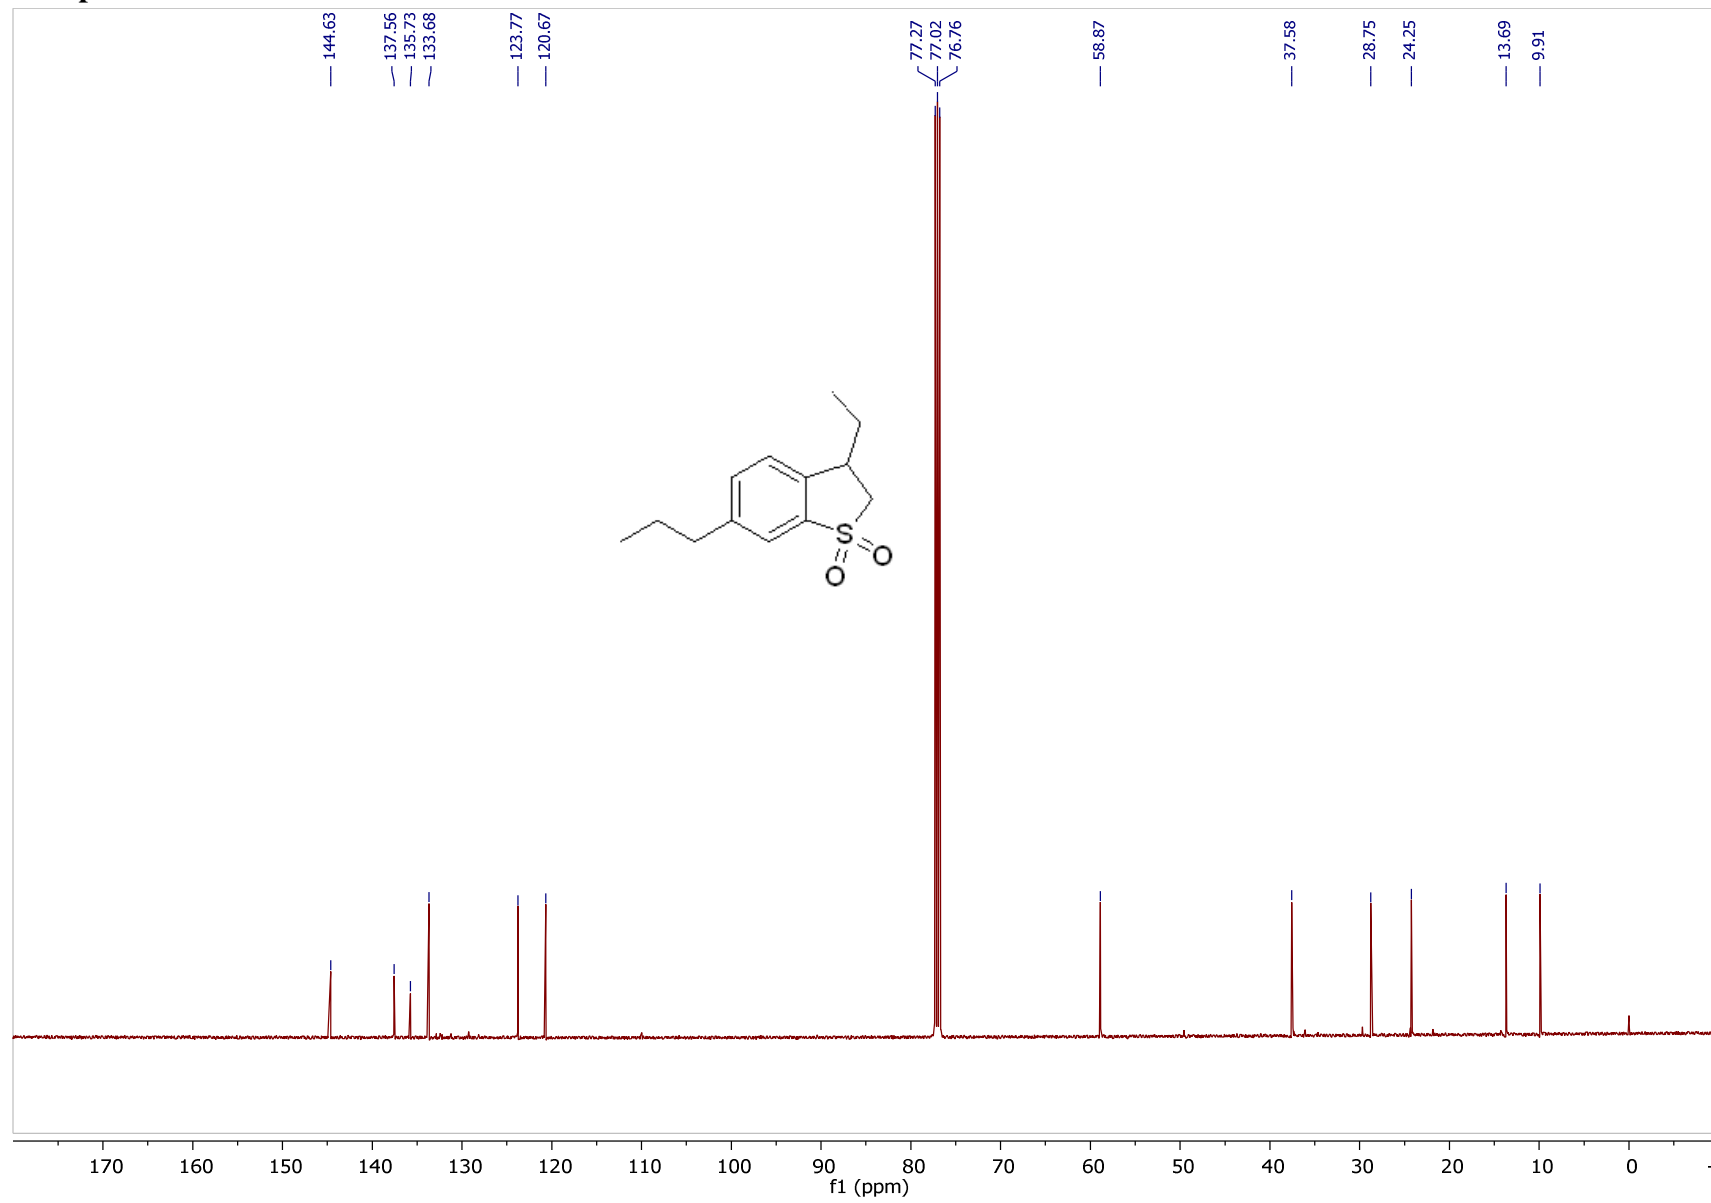

S2-53

Compound 1b

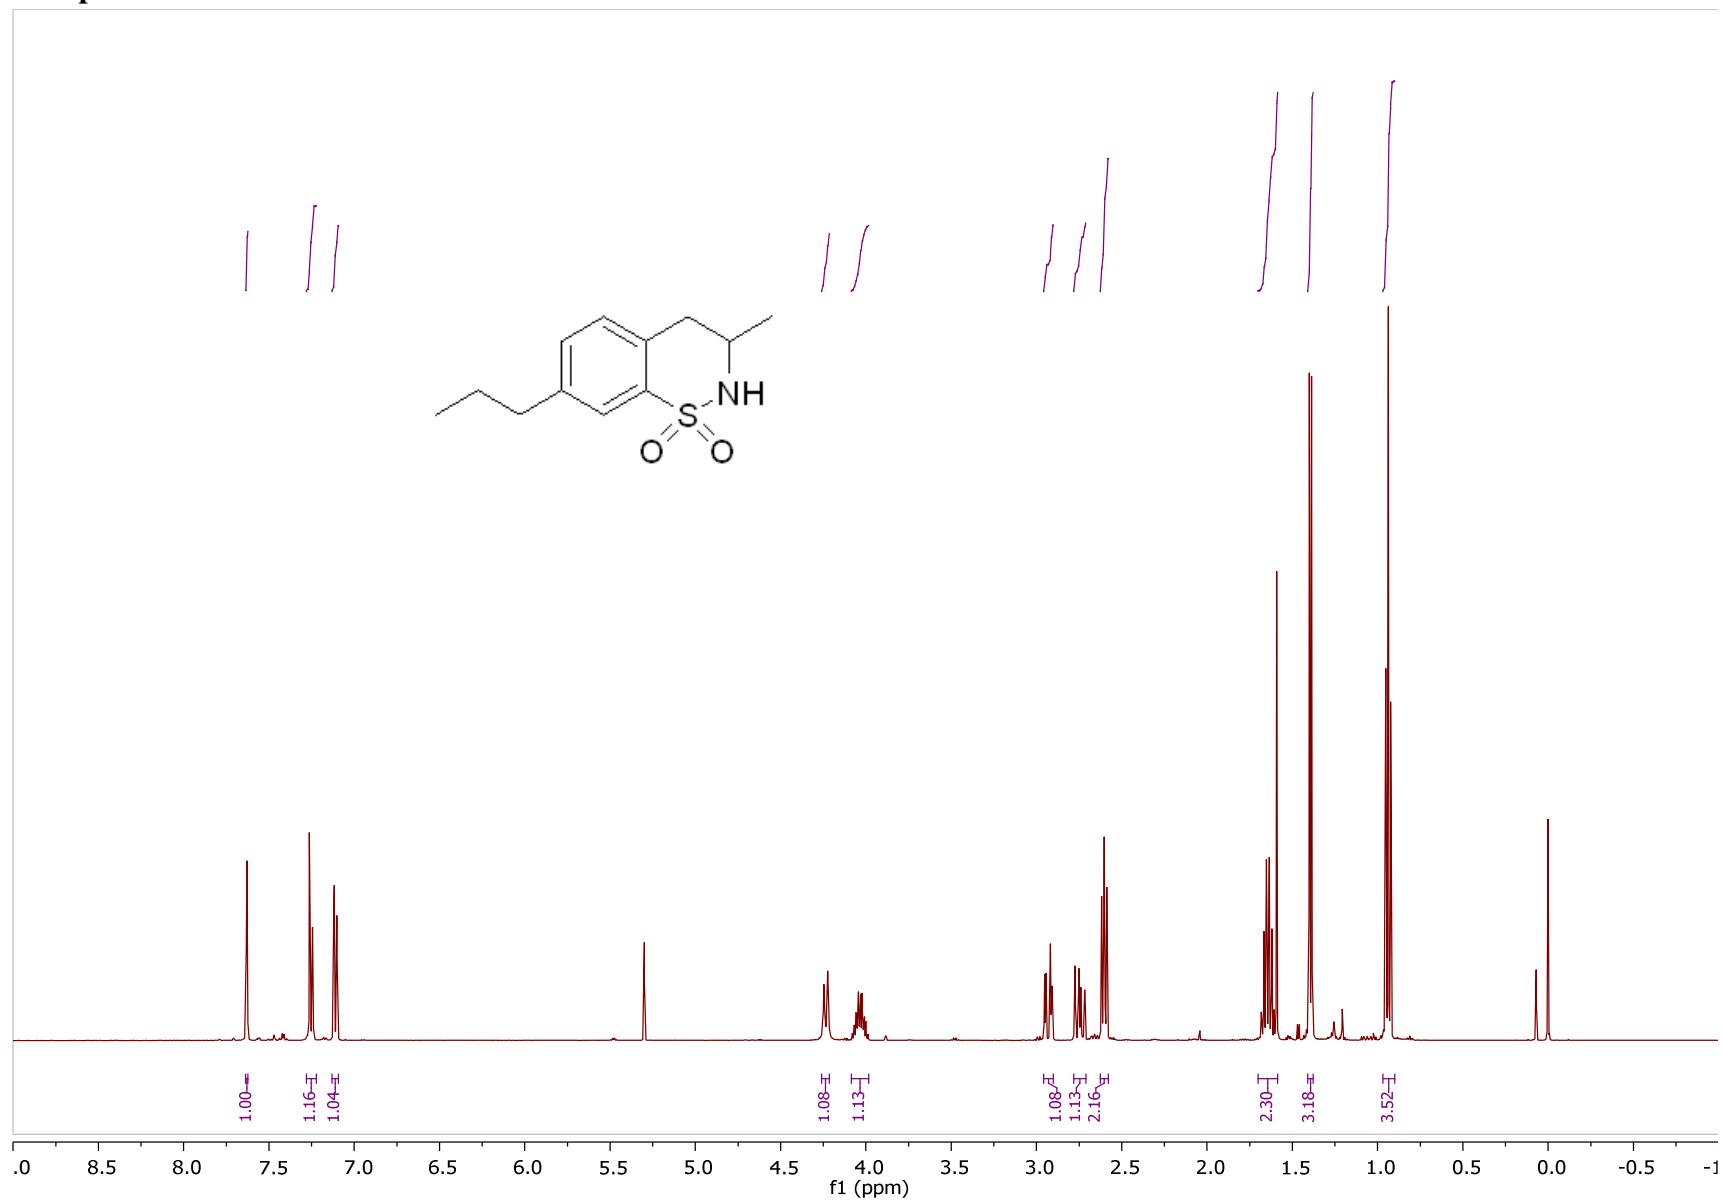

# Compound 1b

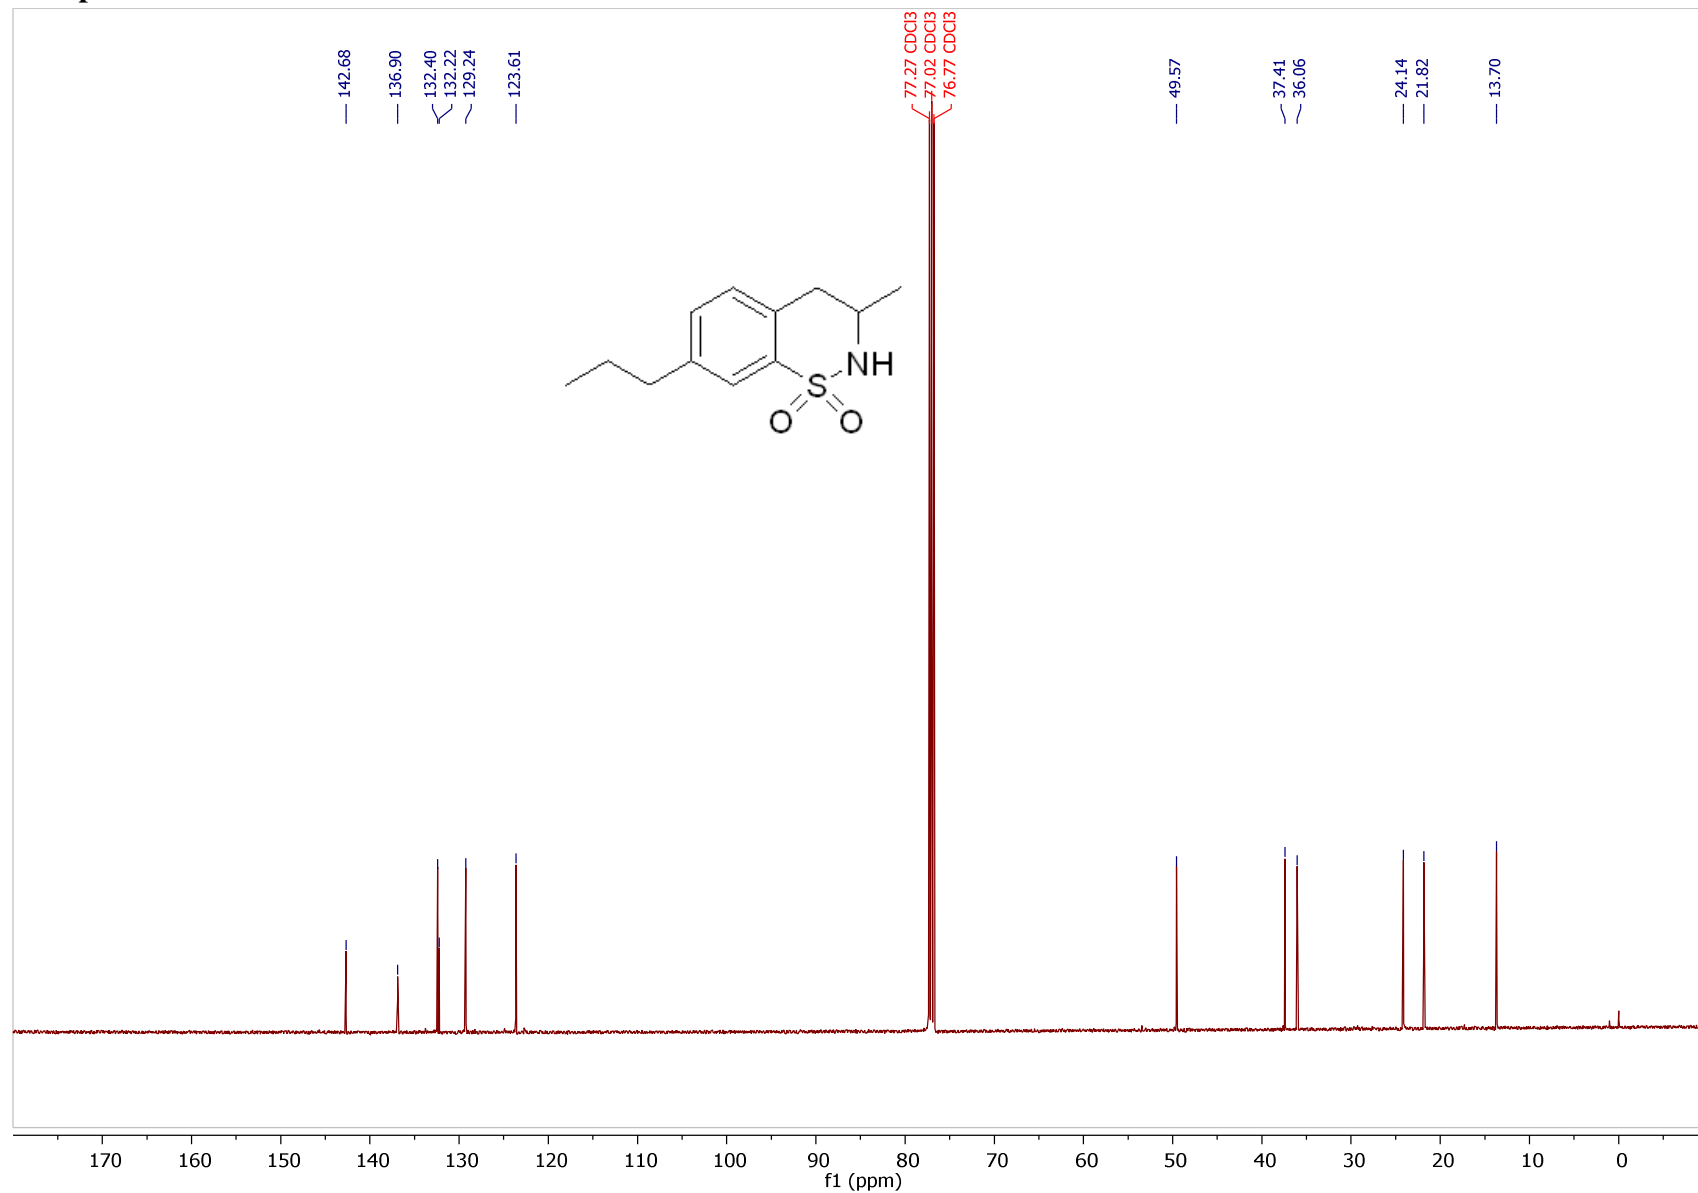

Compound 2a

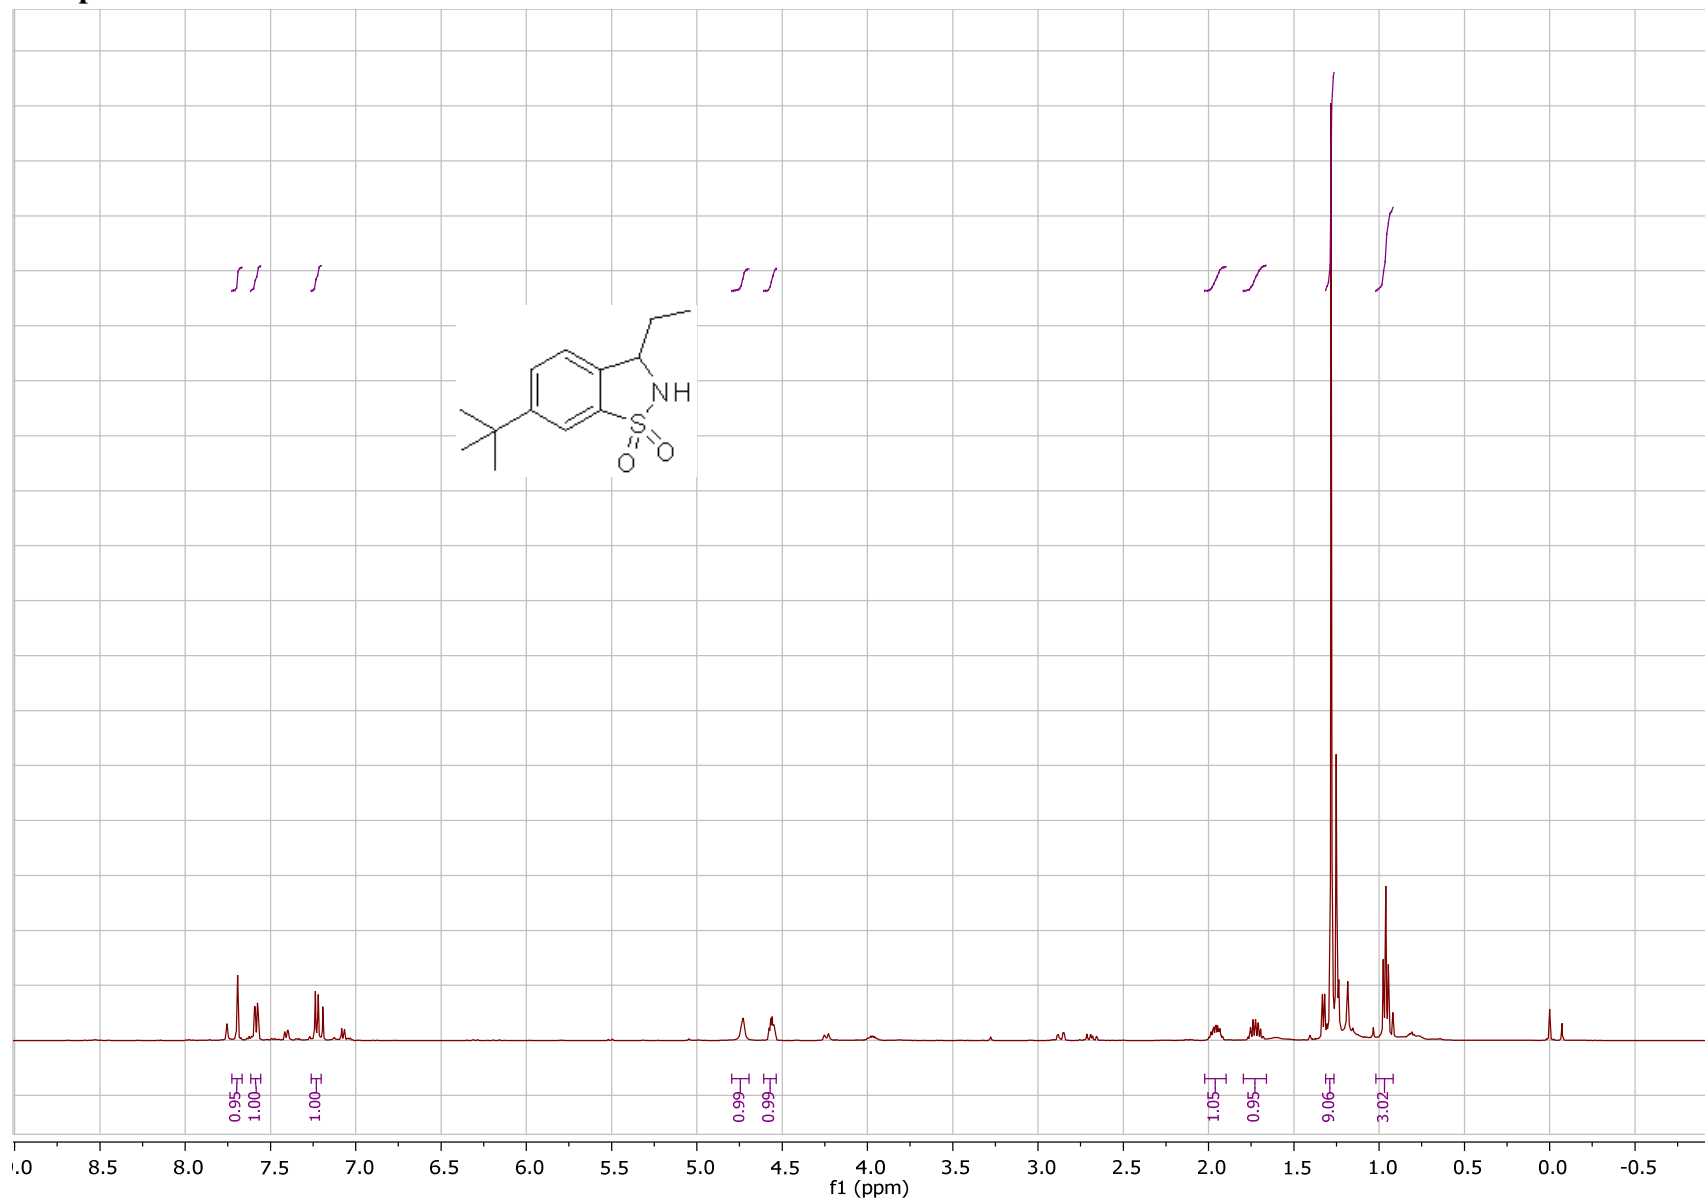

# Compound 2a

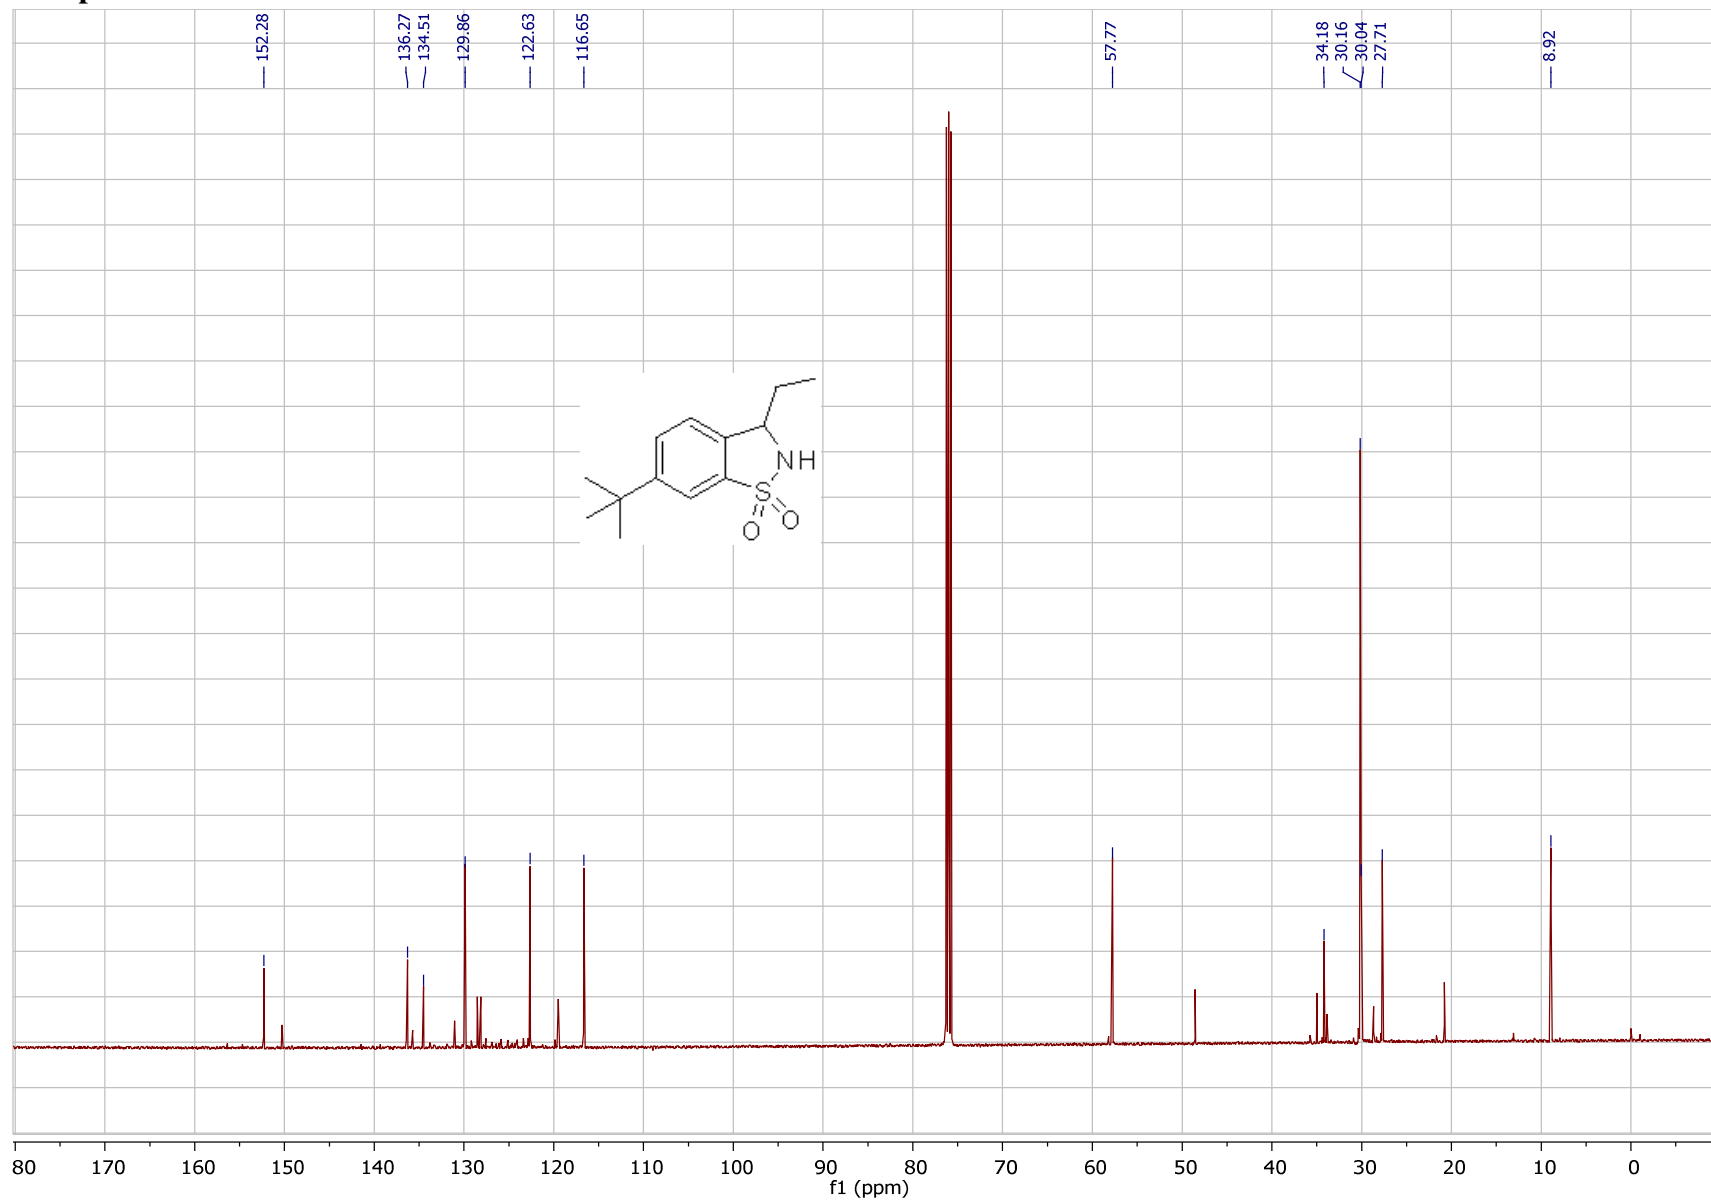

S2-57

# Compound 2b

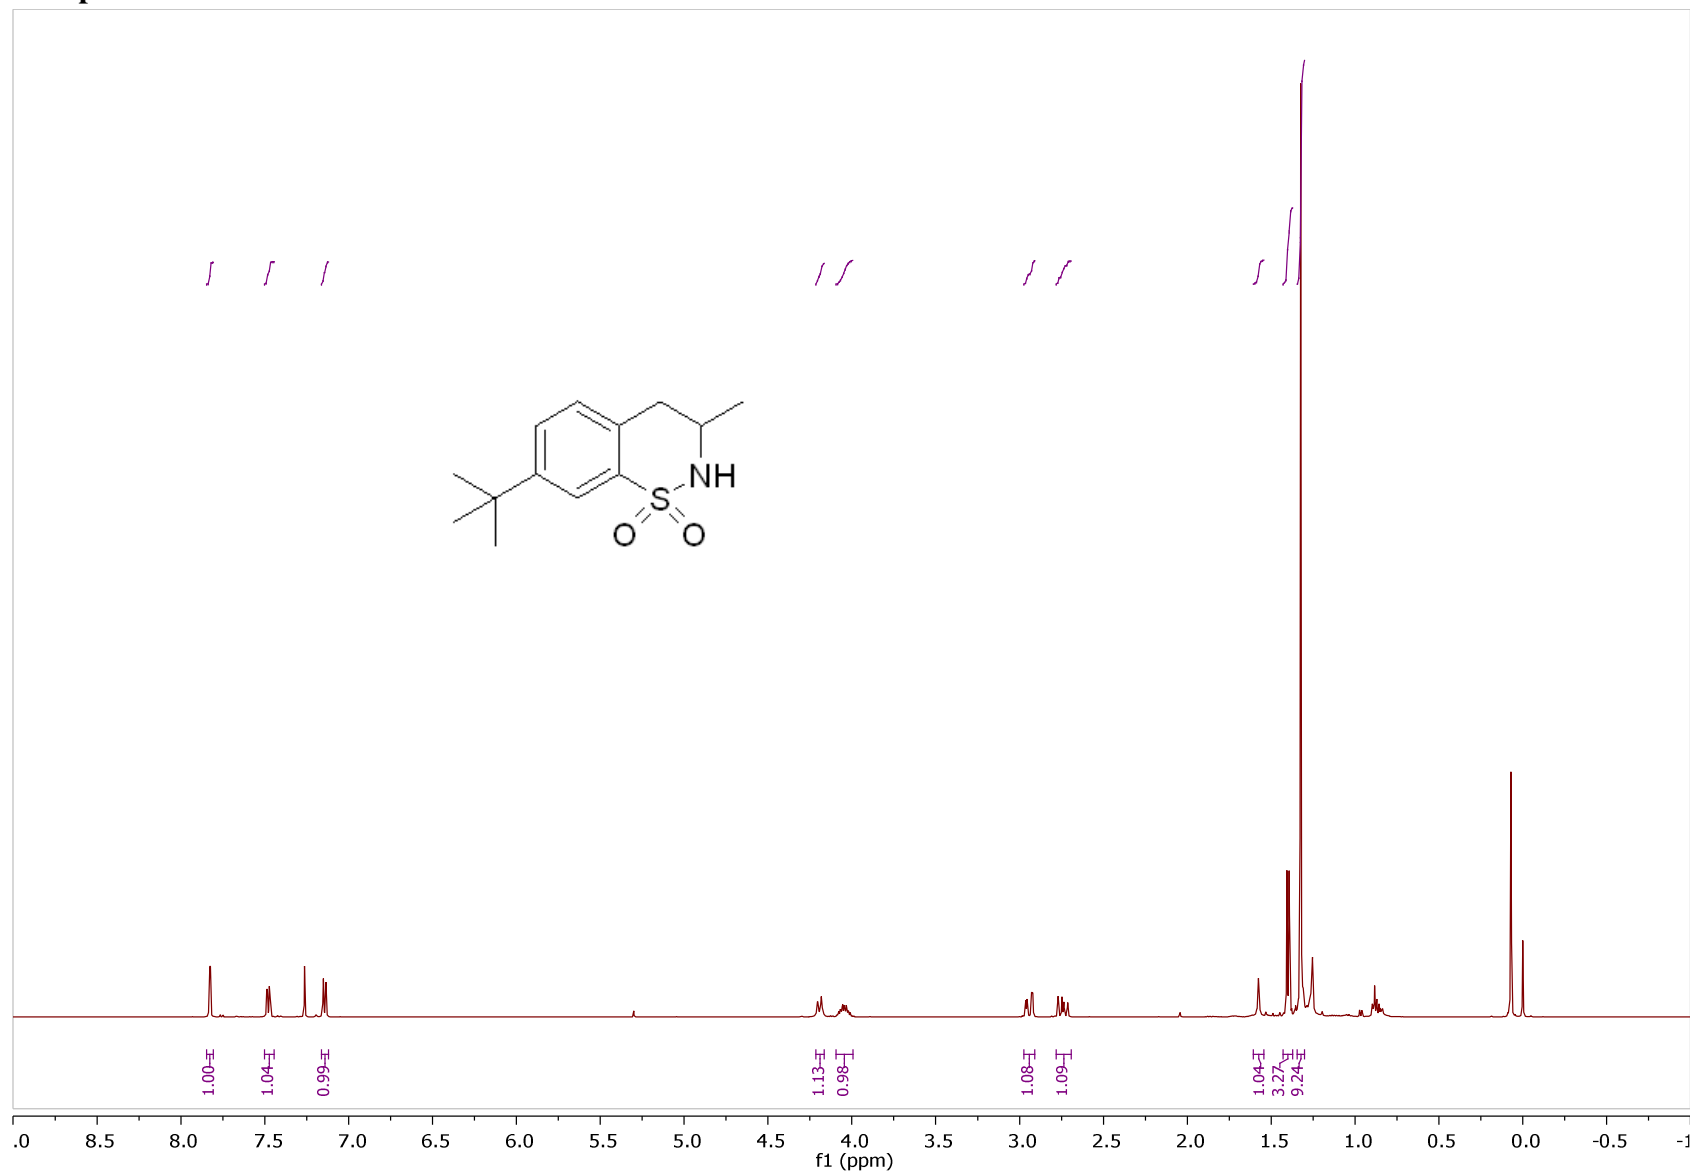

# Compound 2b

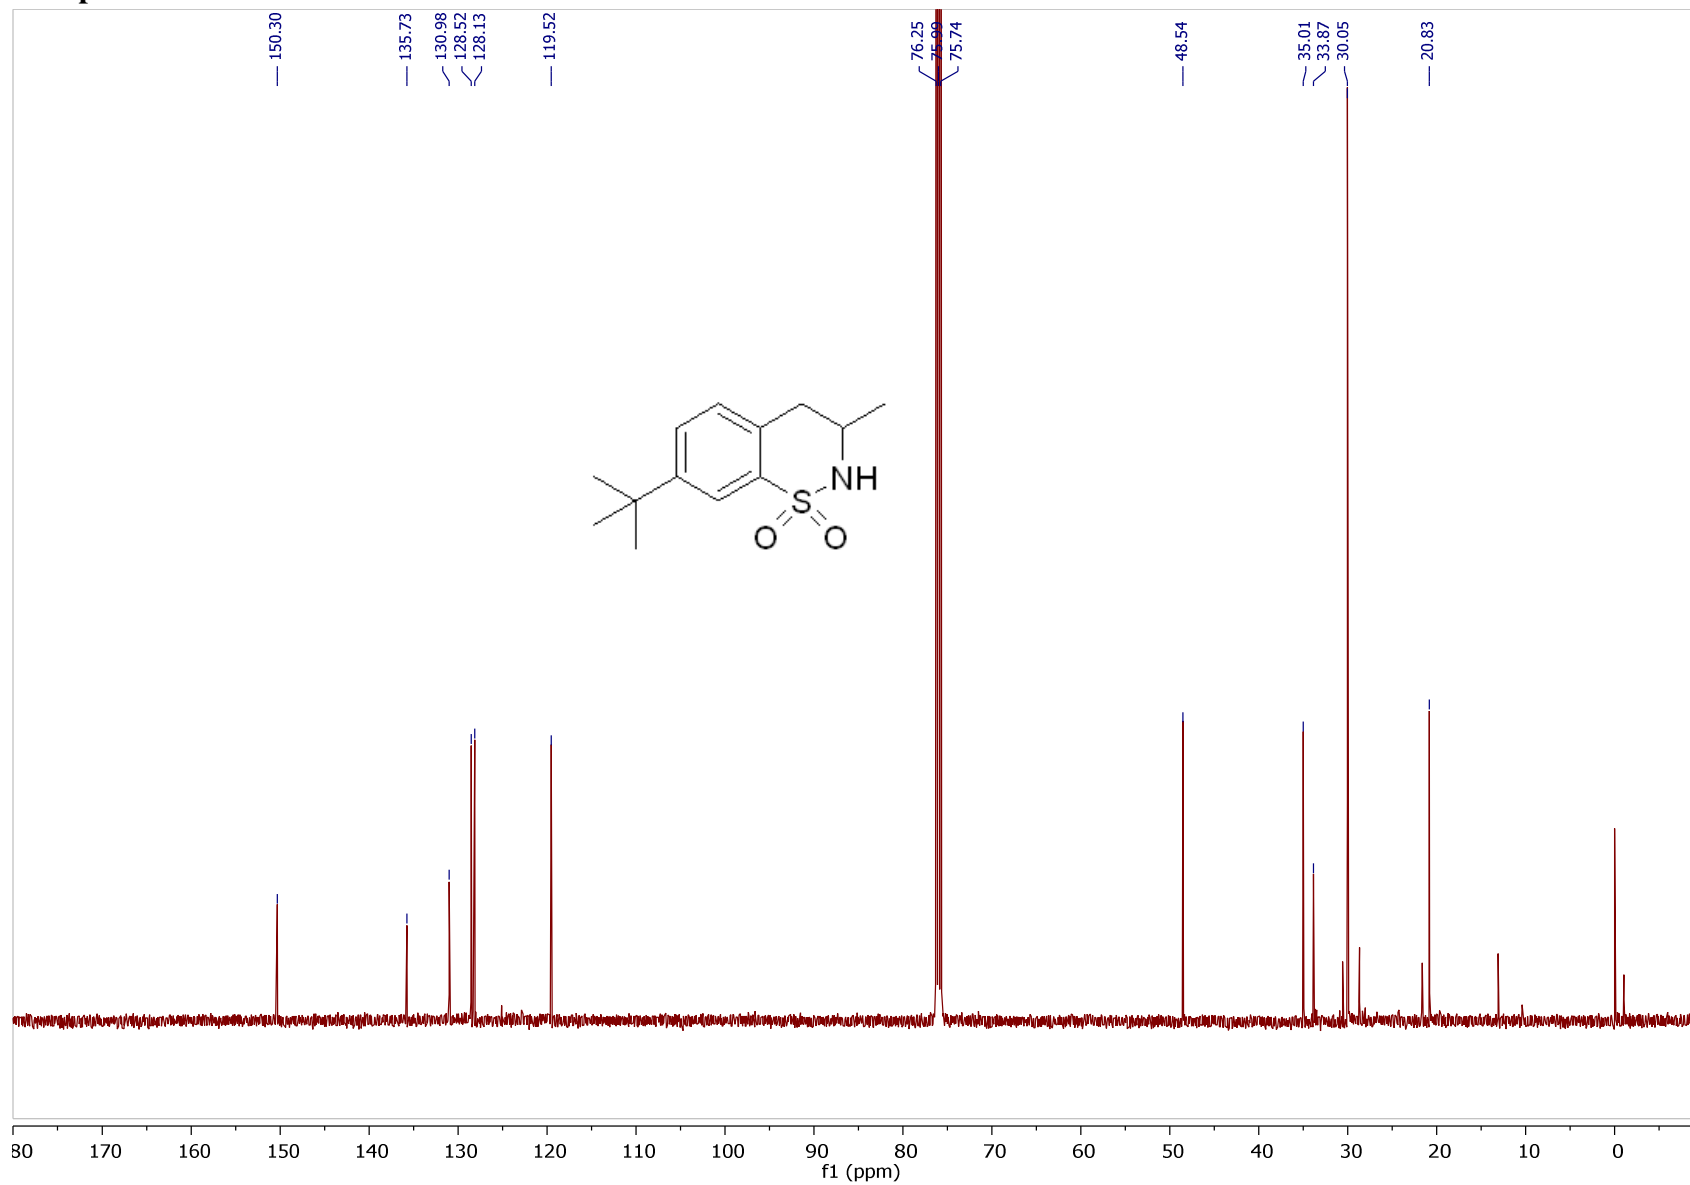

# Compound 3a

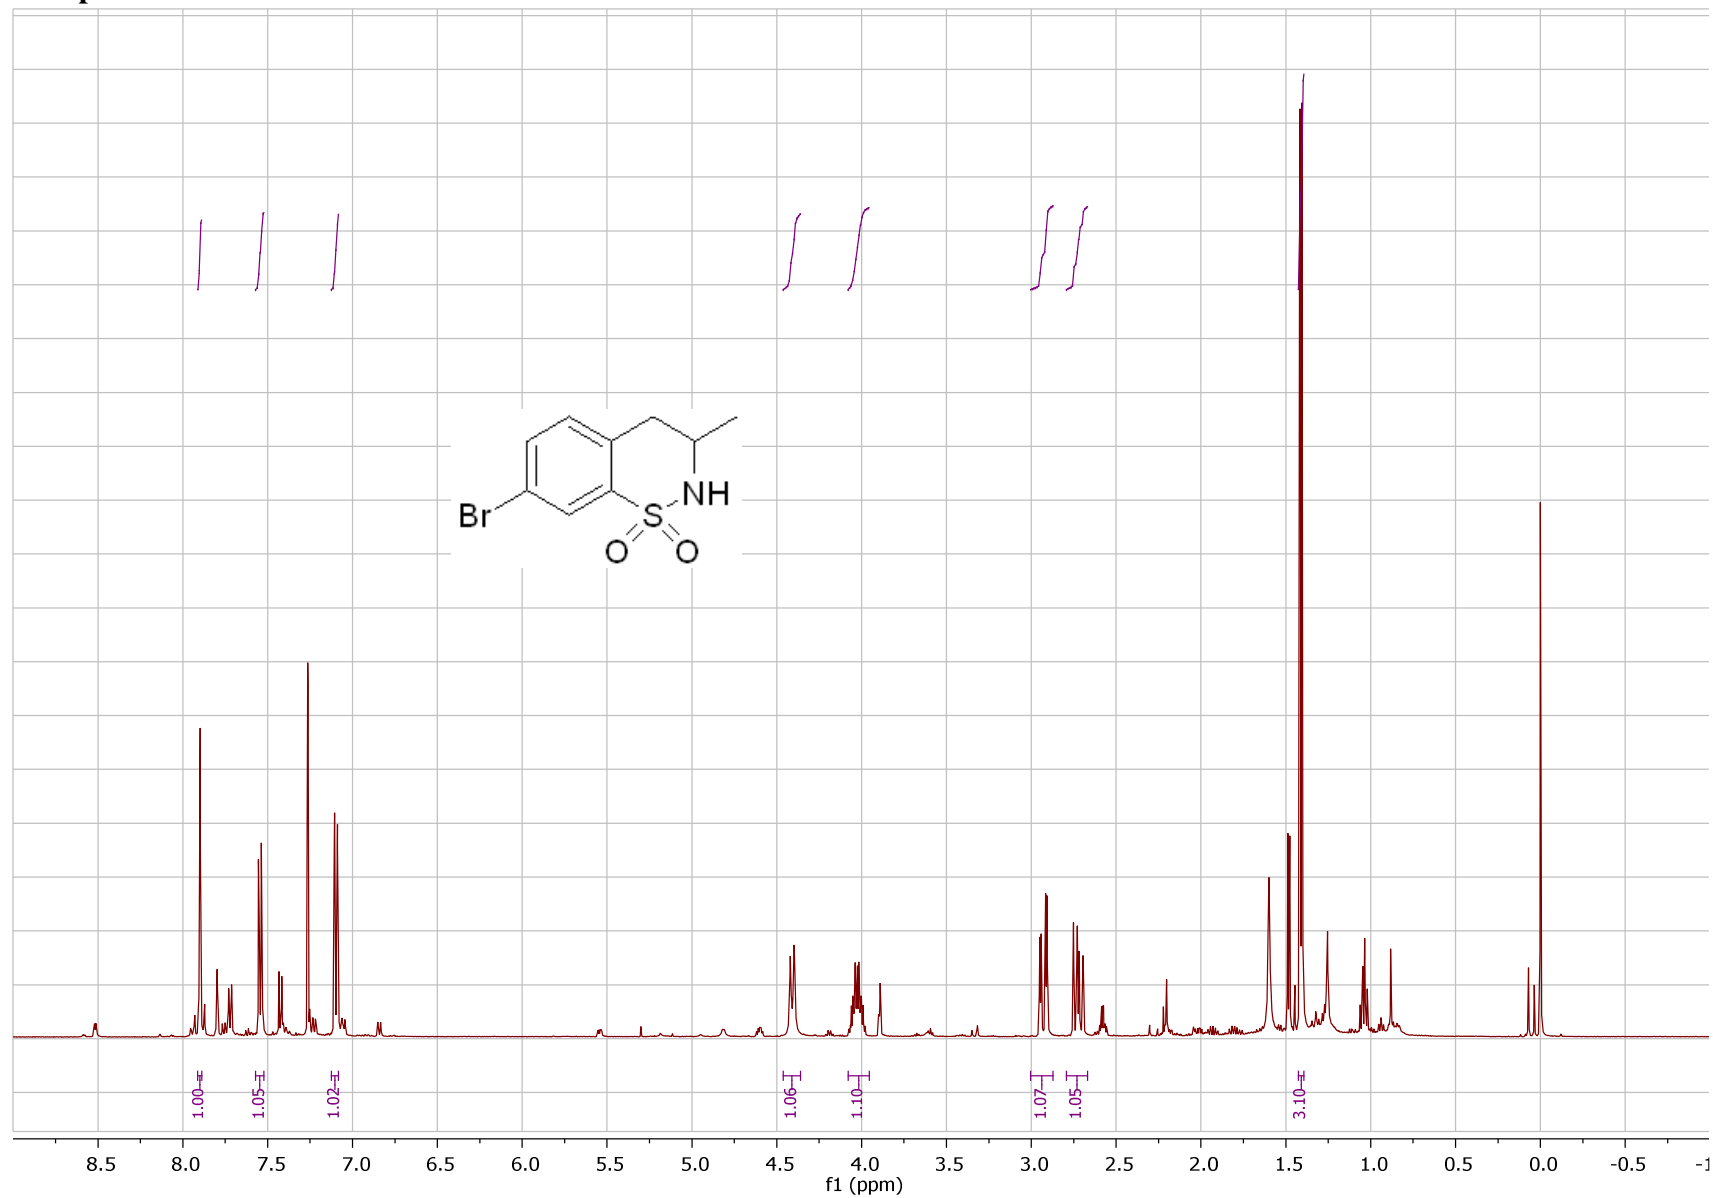

# Compound 3a

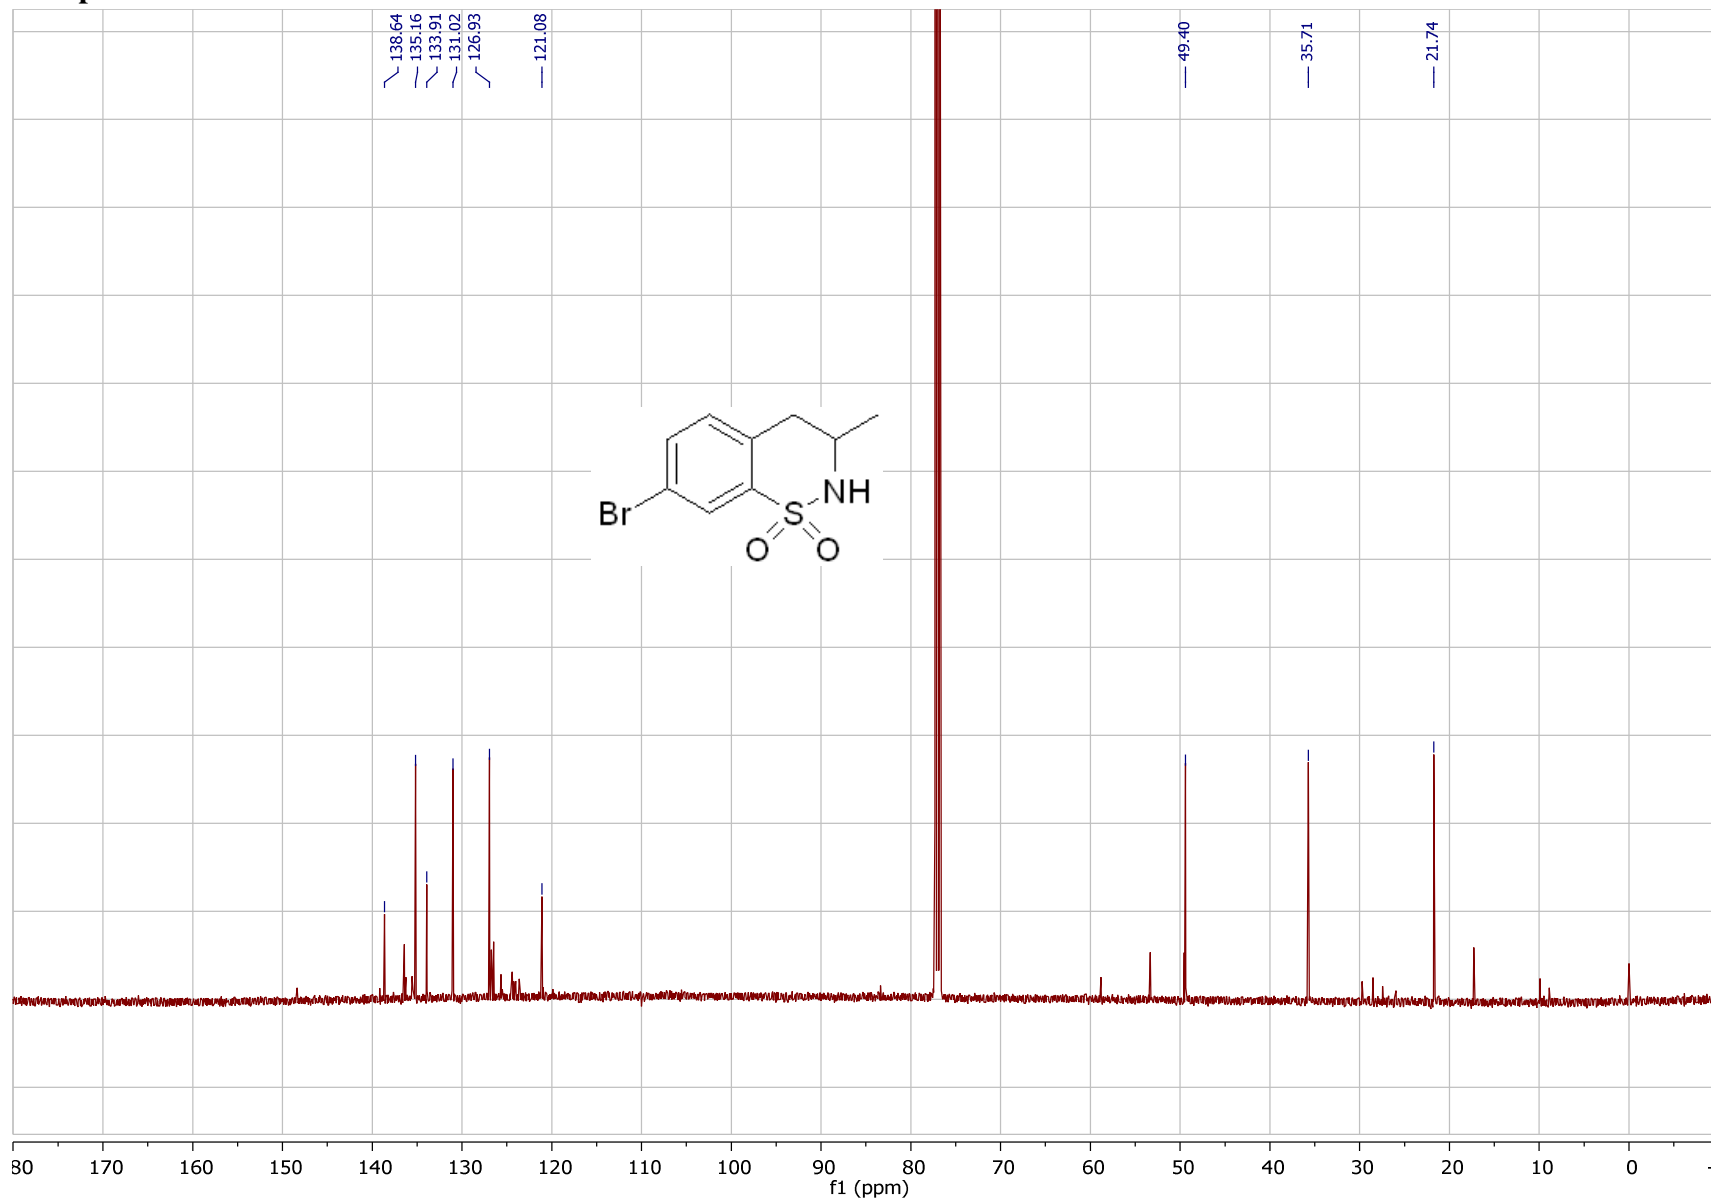

S2-61

Compound 4a/4b

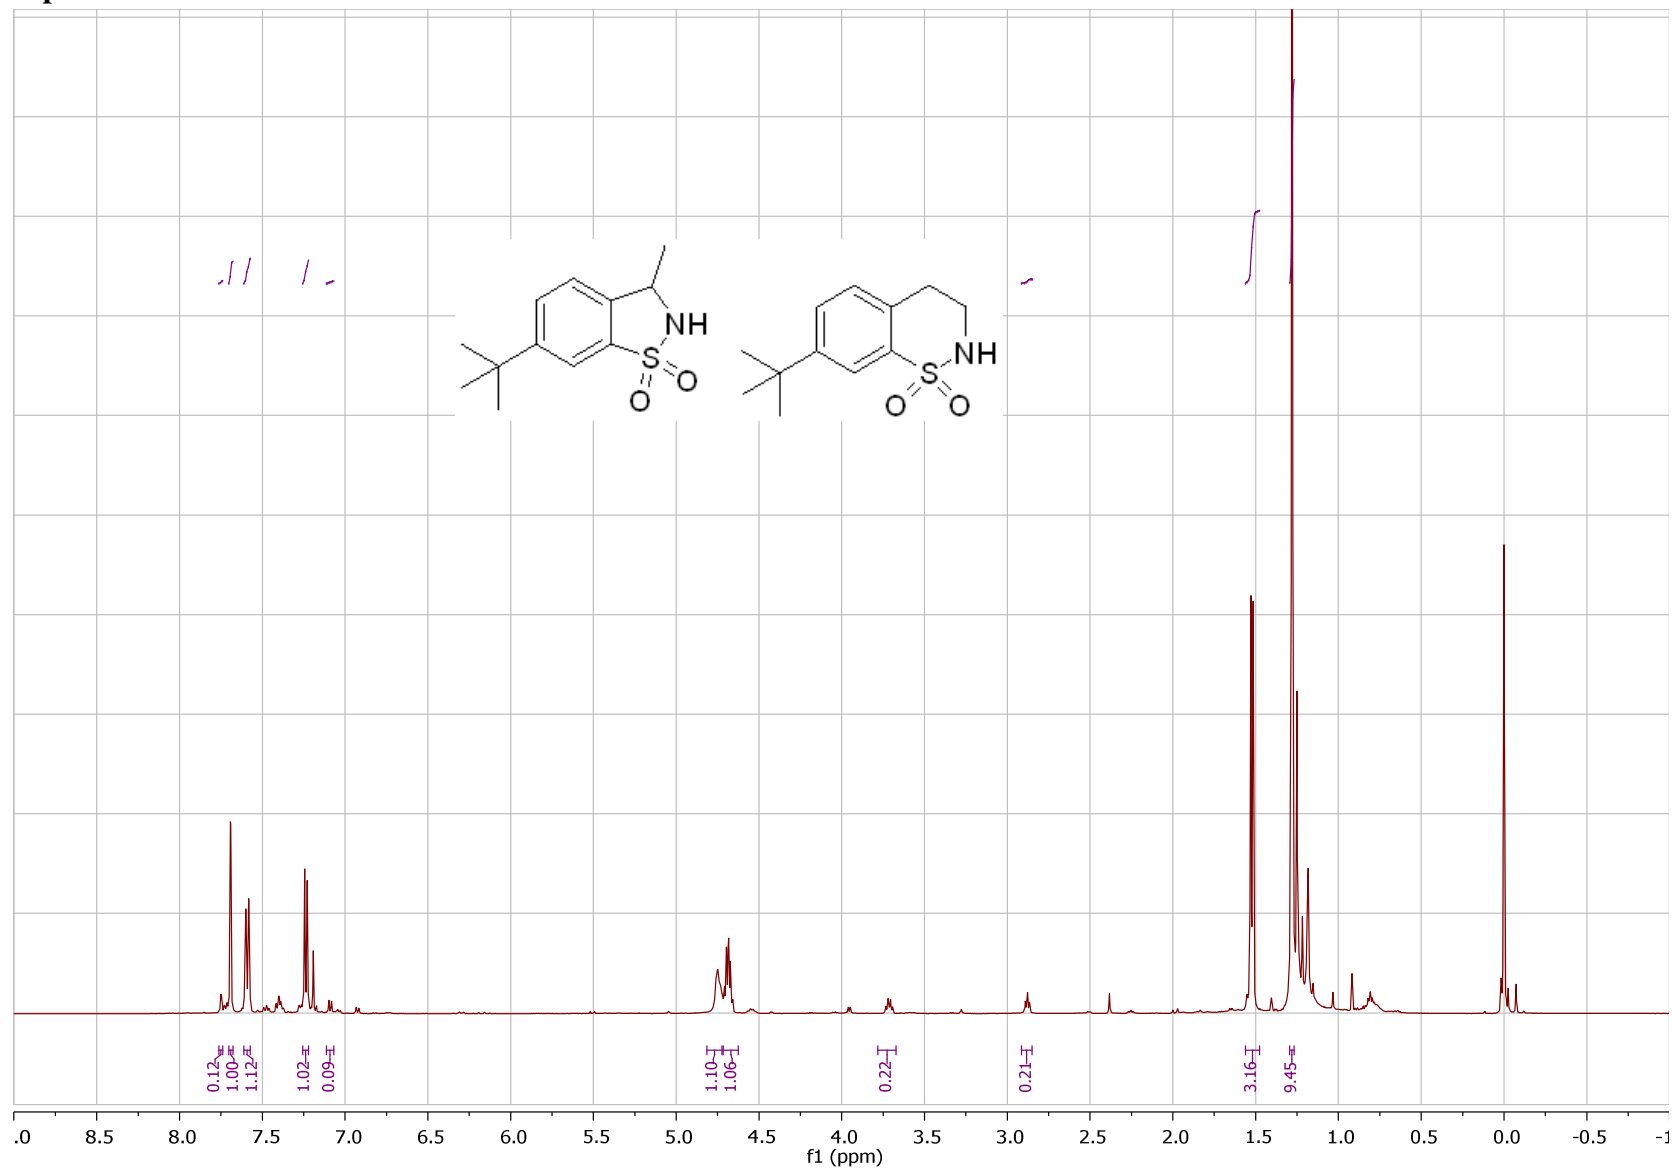

# Compound 4a/4b

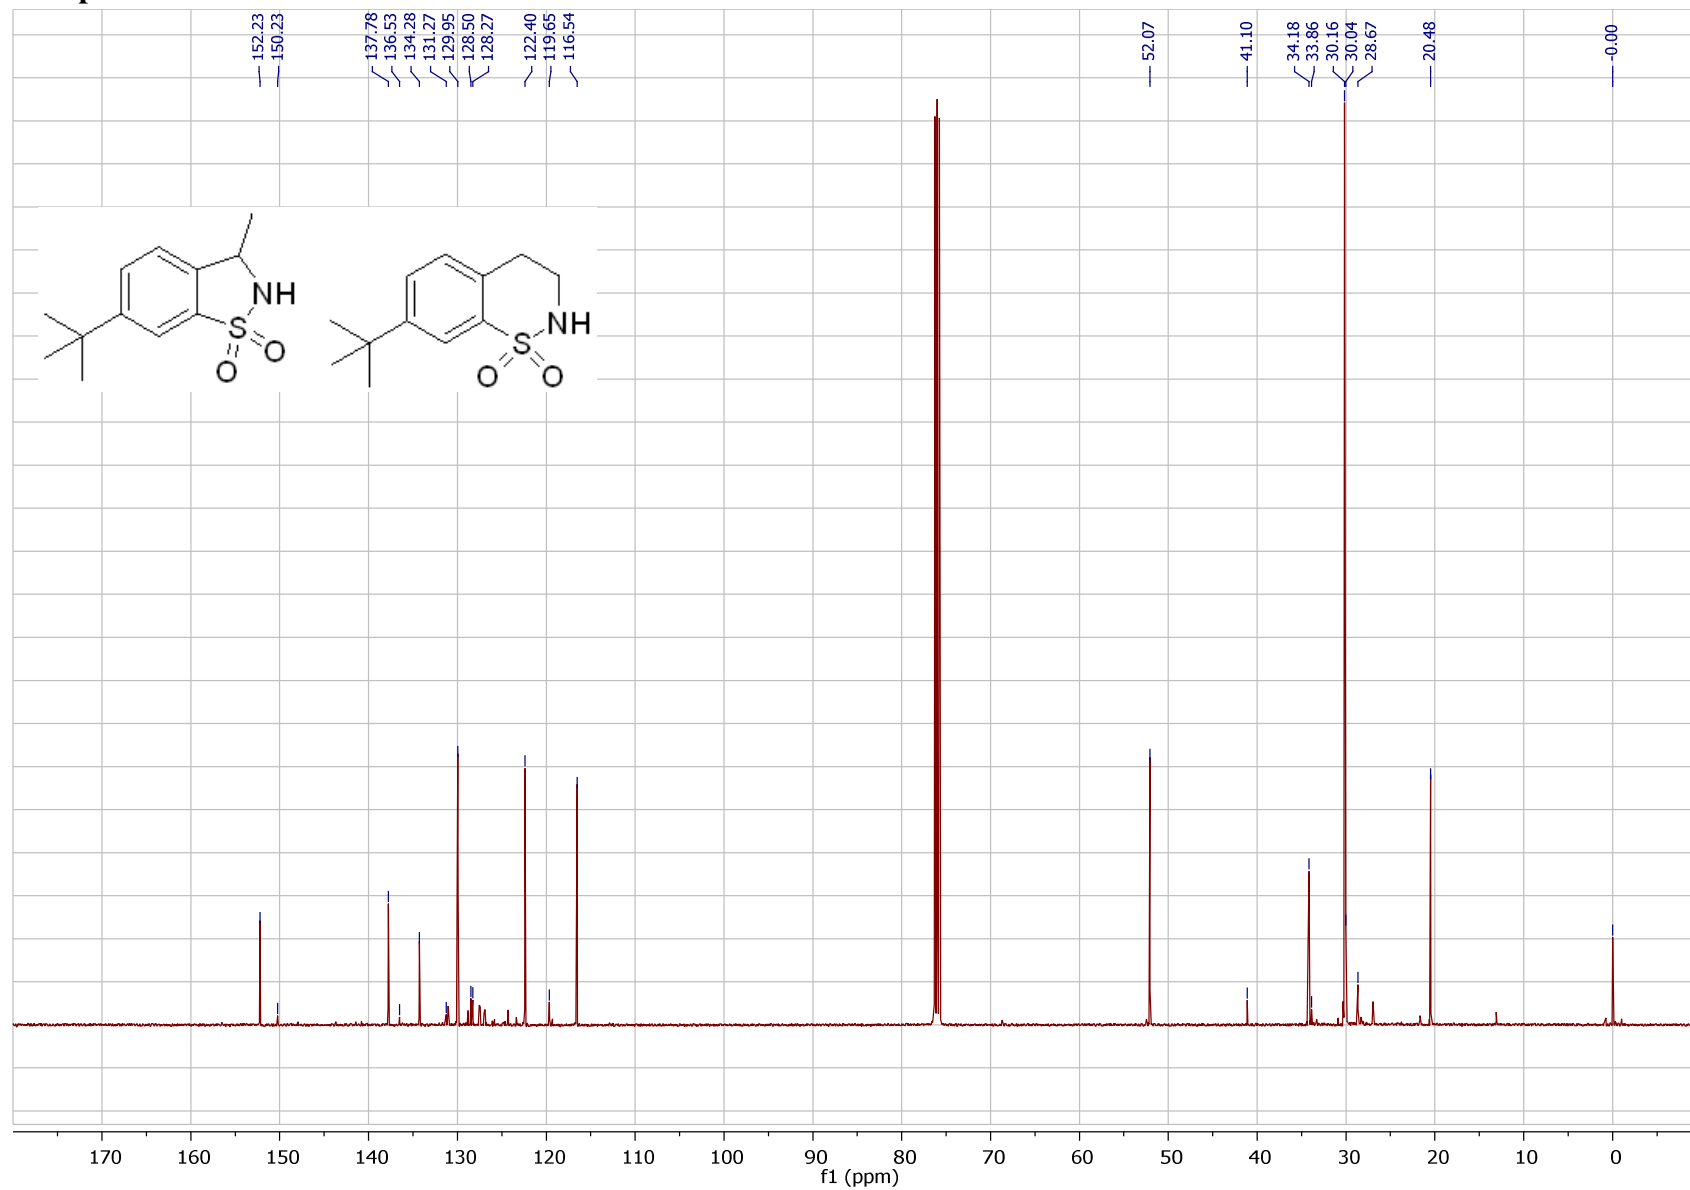

Compound 4a/4b

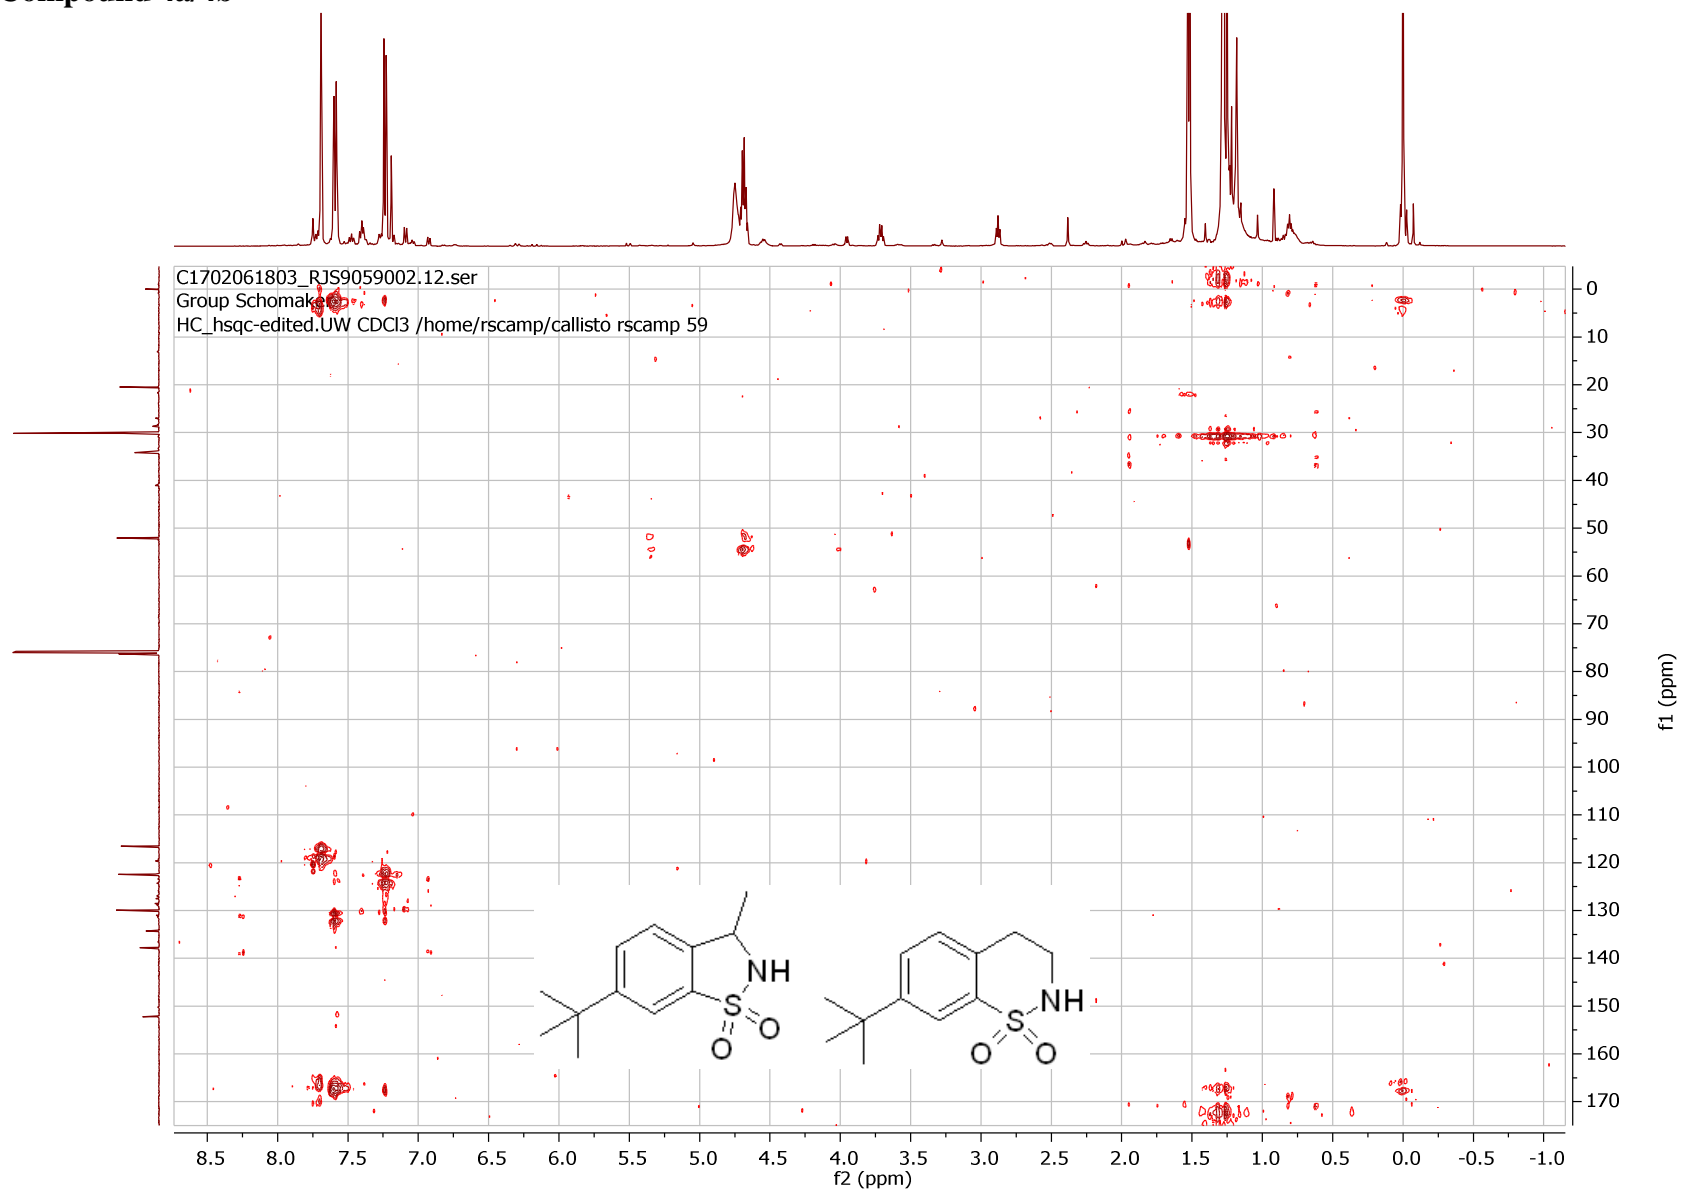

Compound 4a/4b

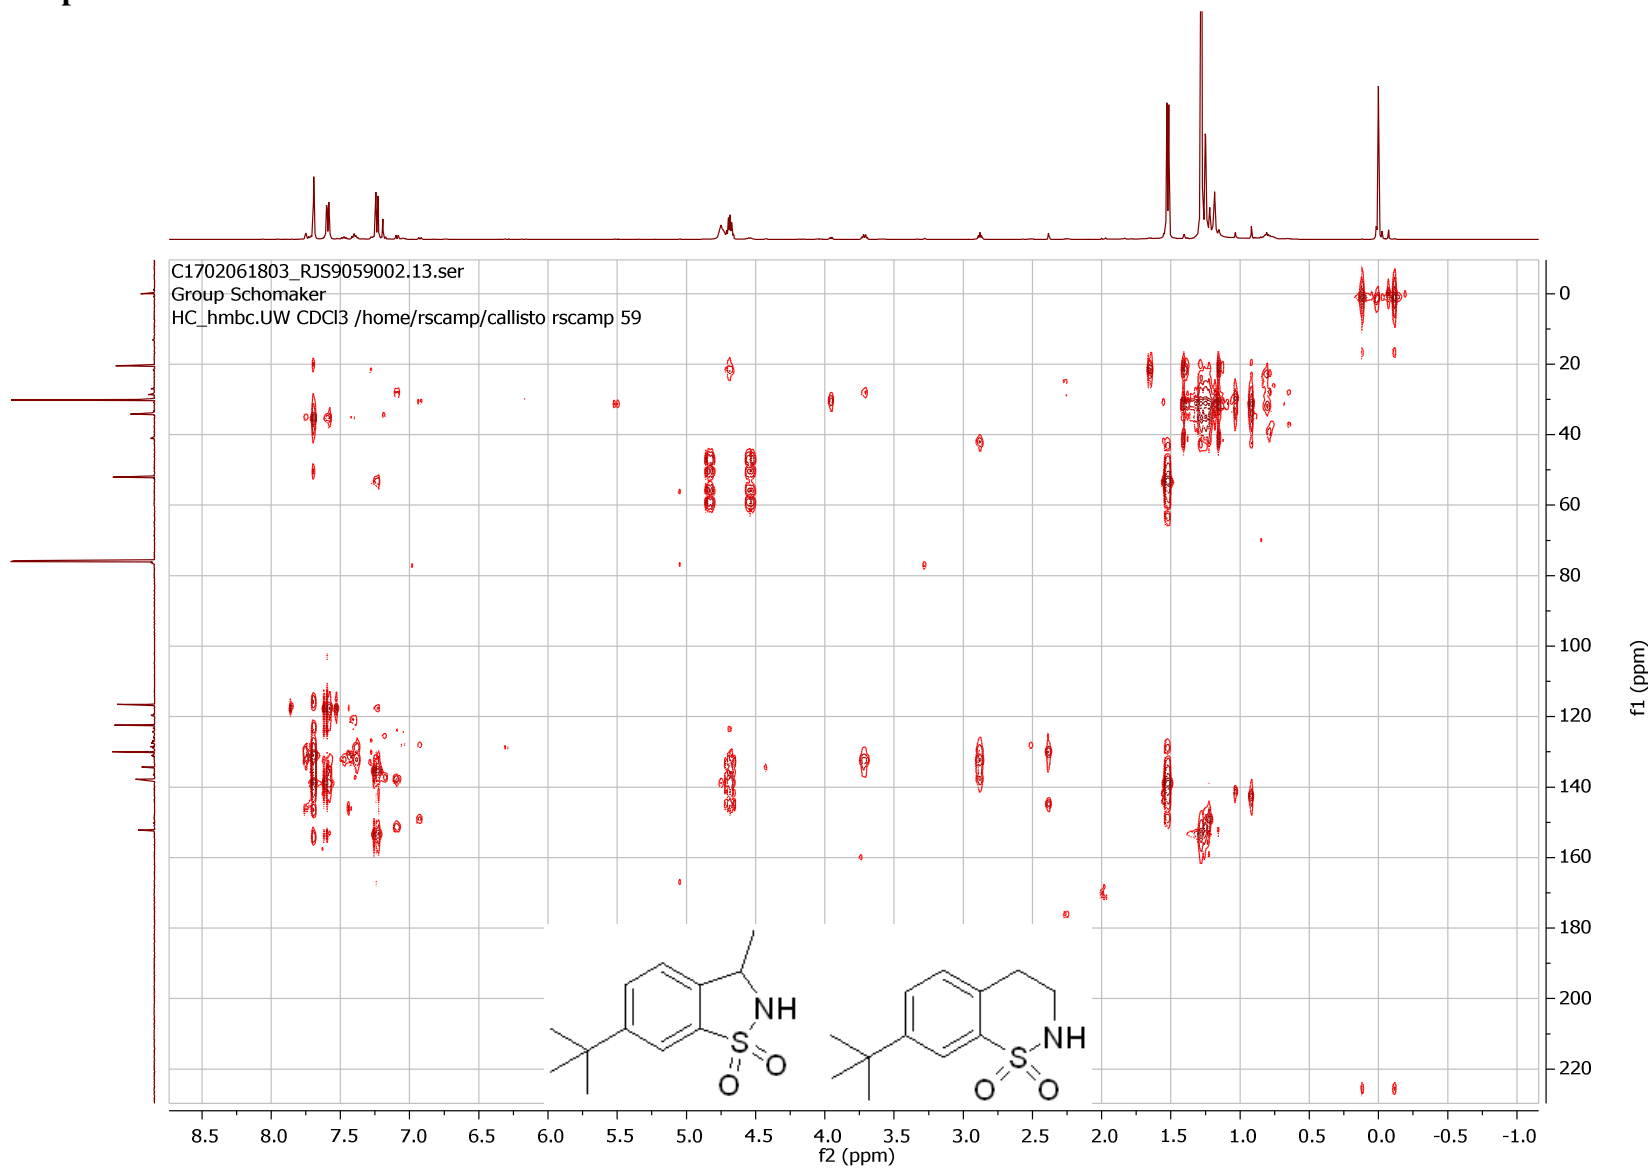

Compound 5a

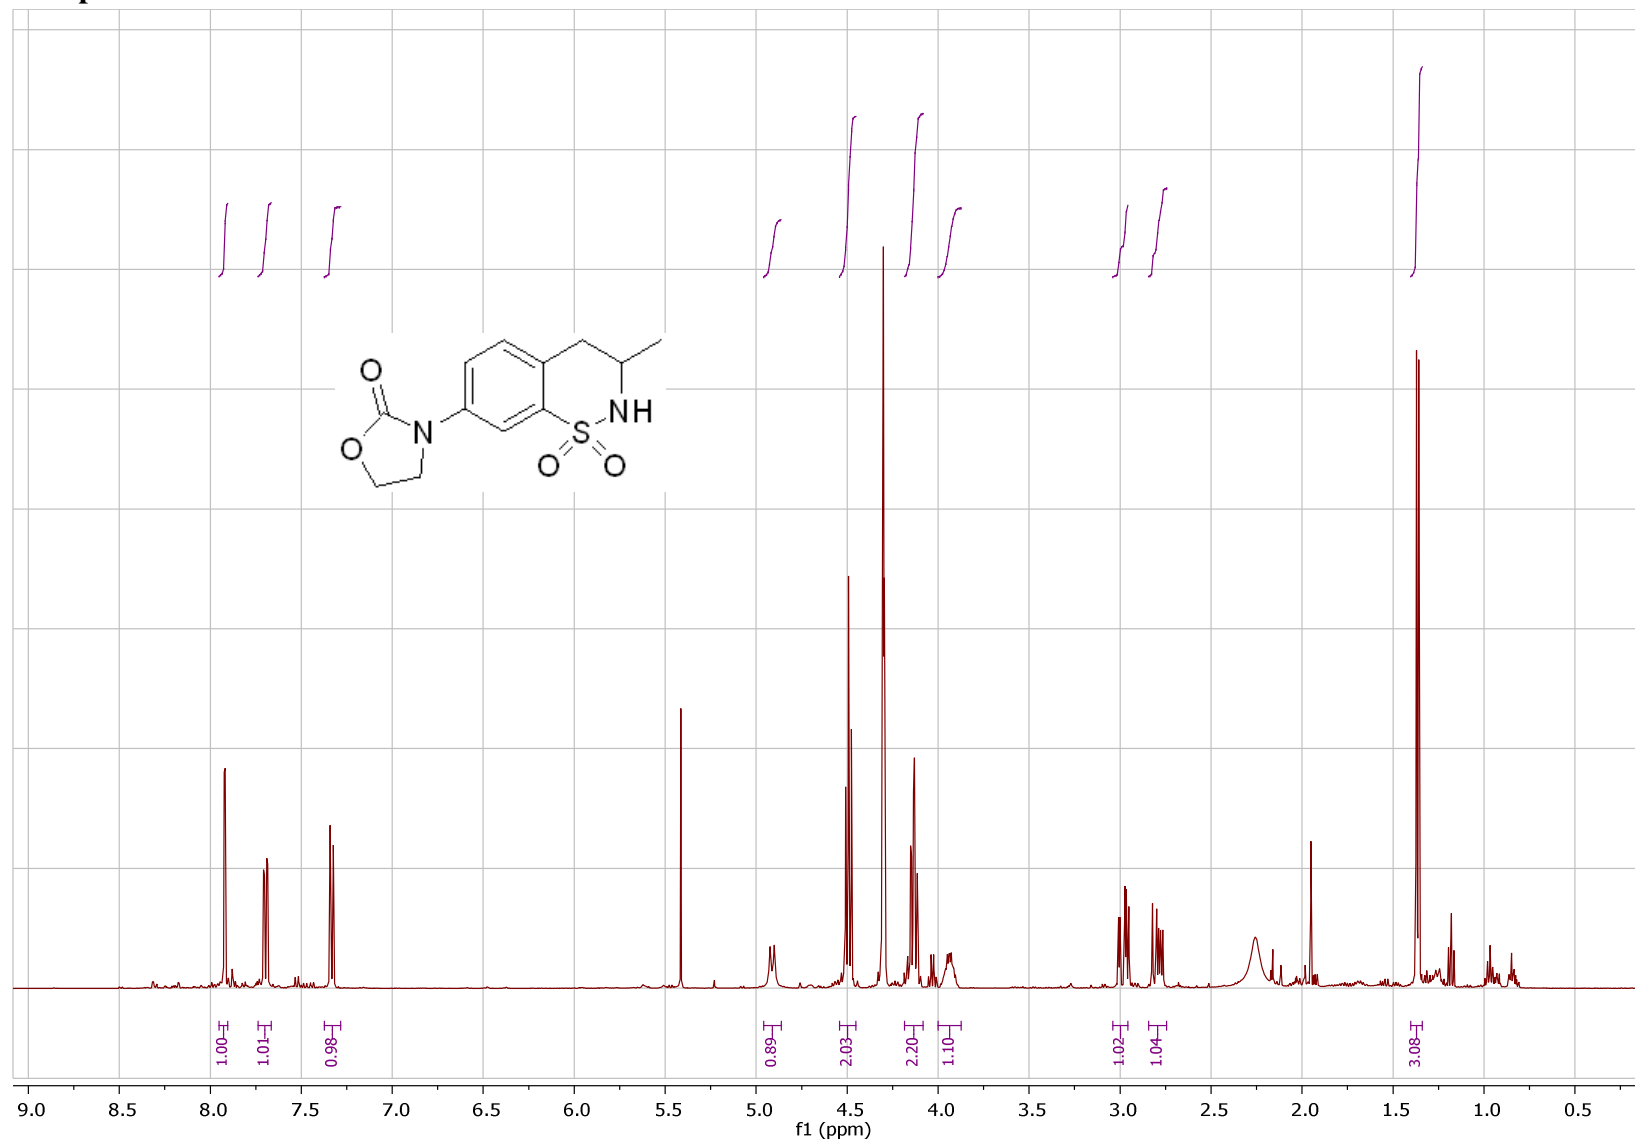

# Compound 5a

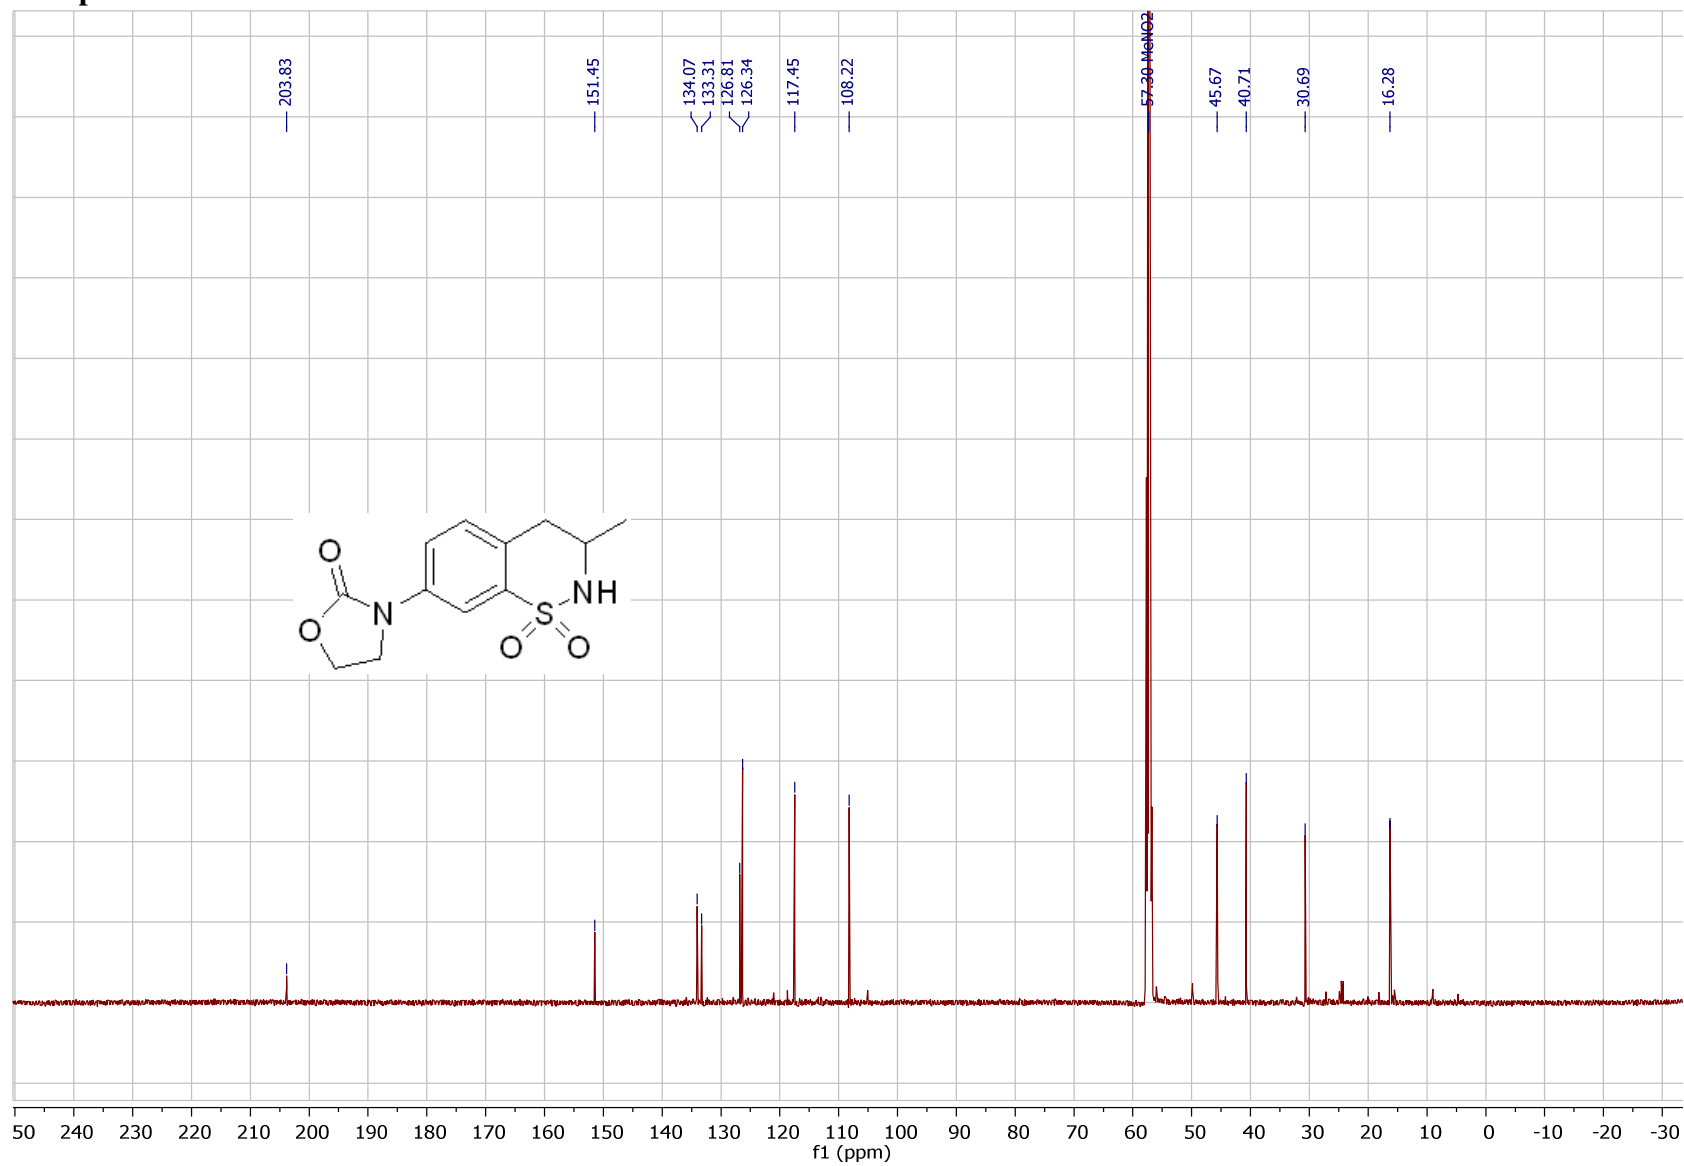

Compound 6a

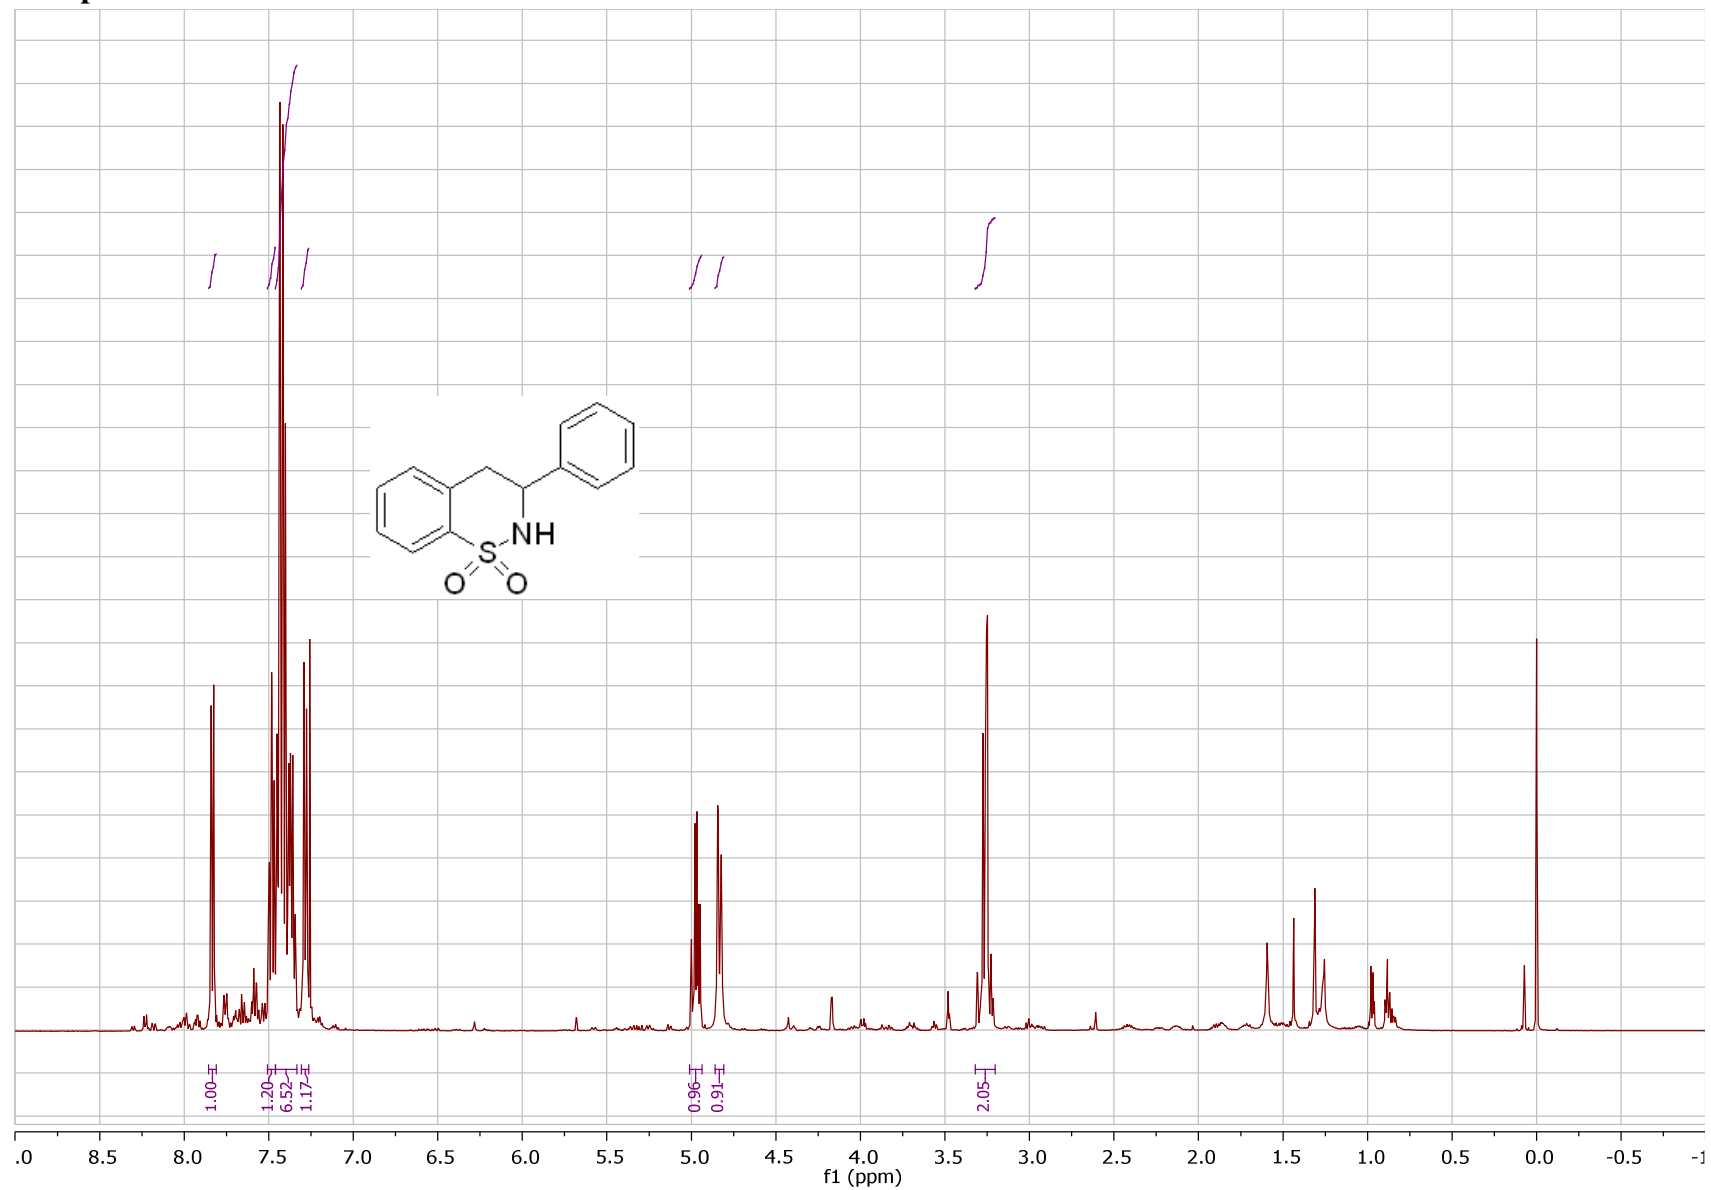

# Compound 6a

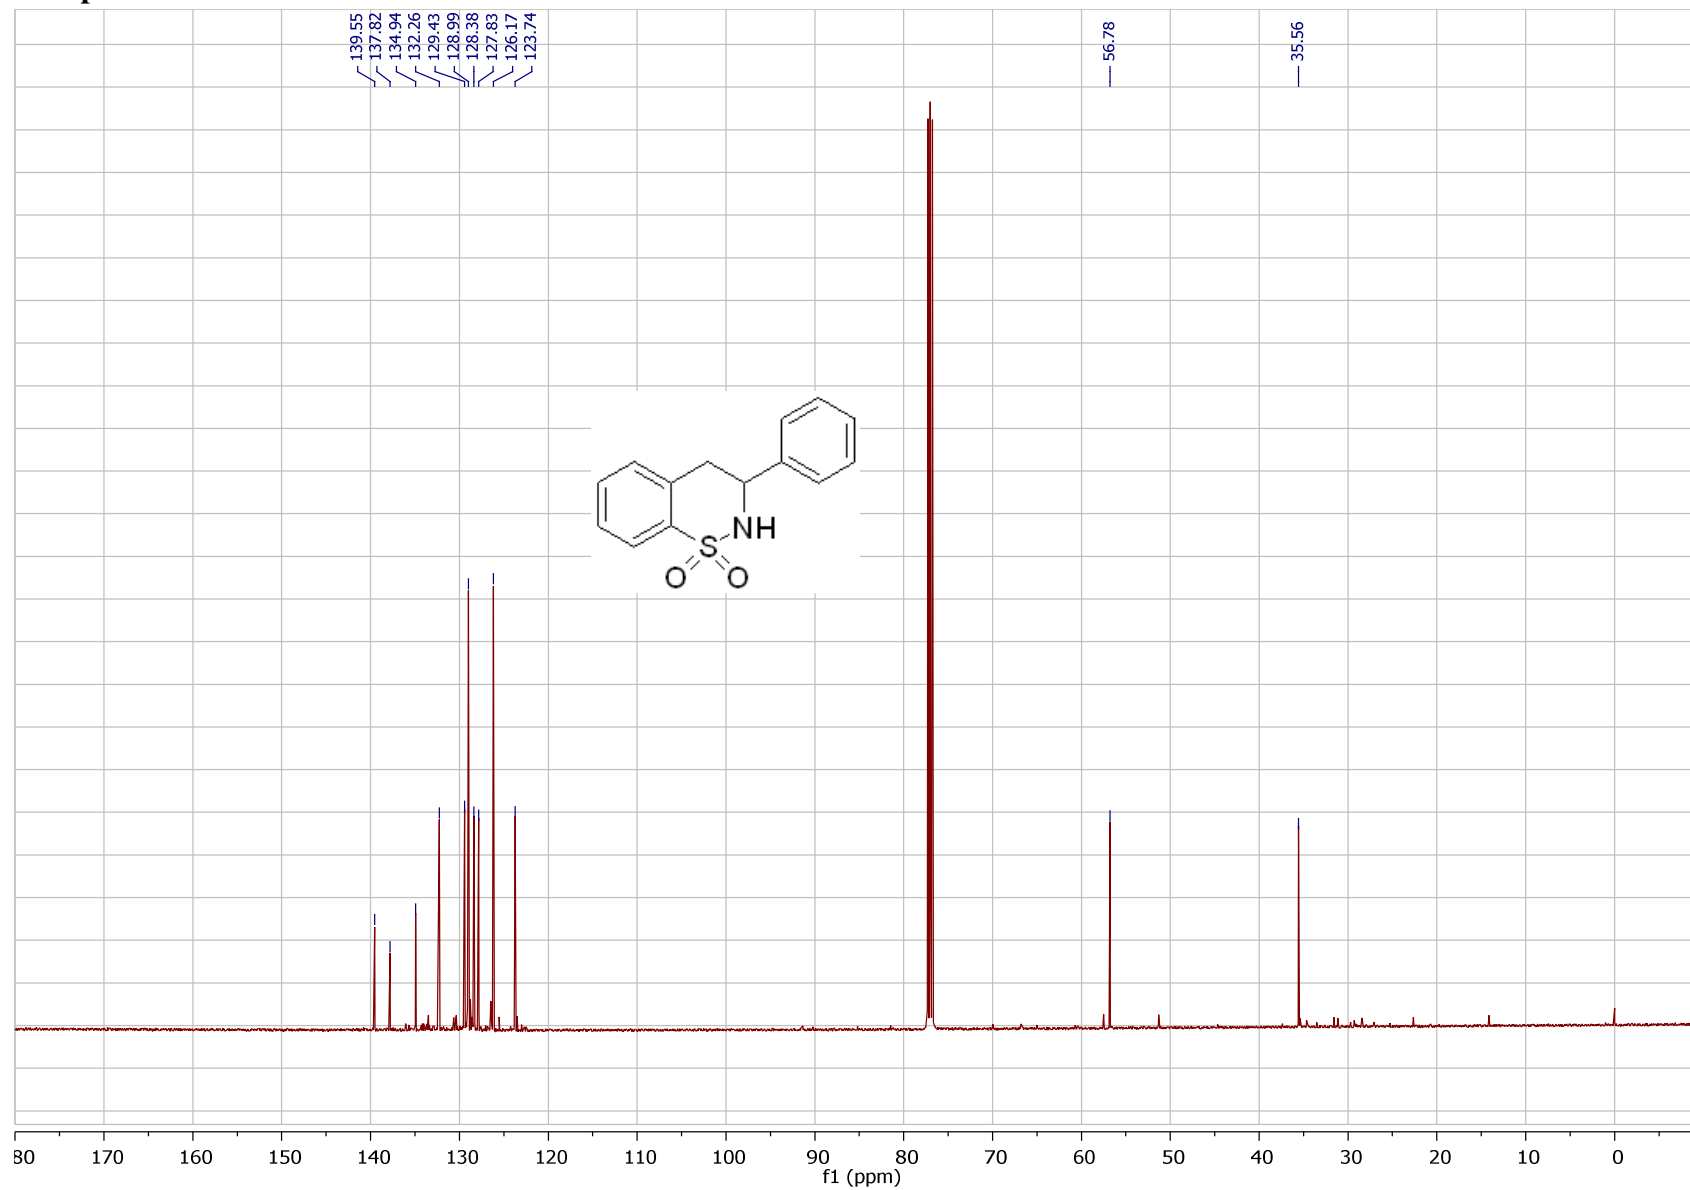

**Compound 7a (isolated as mixture)**

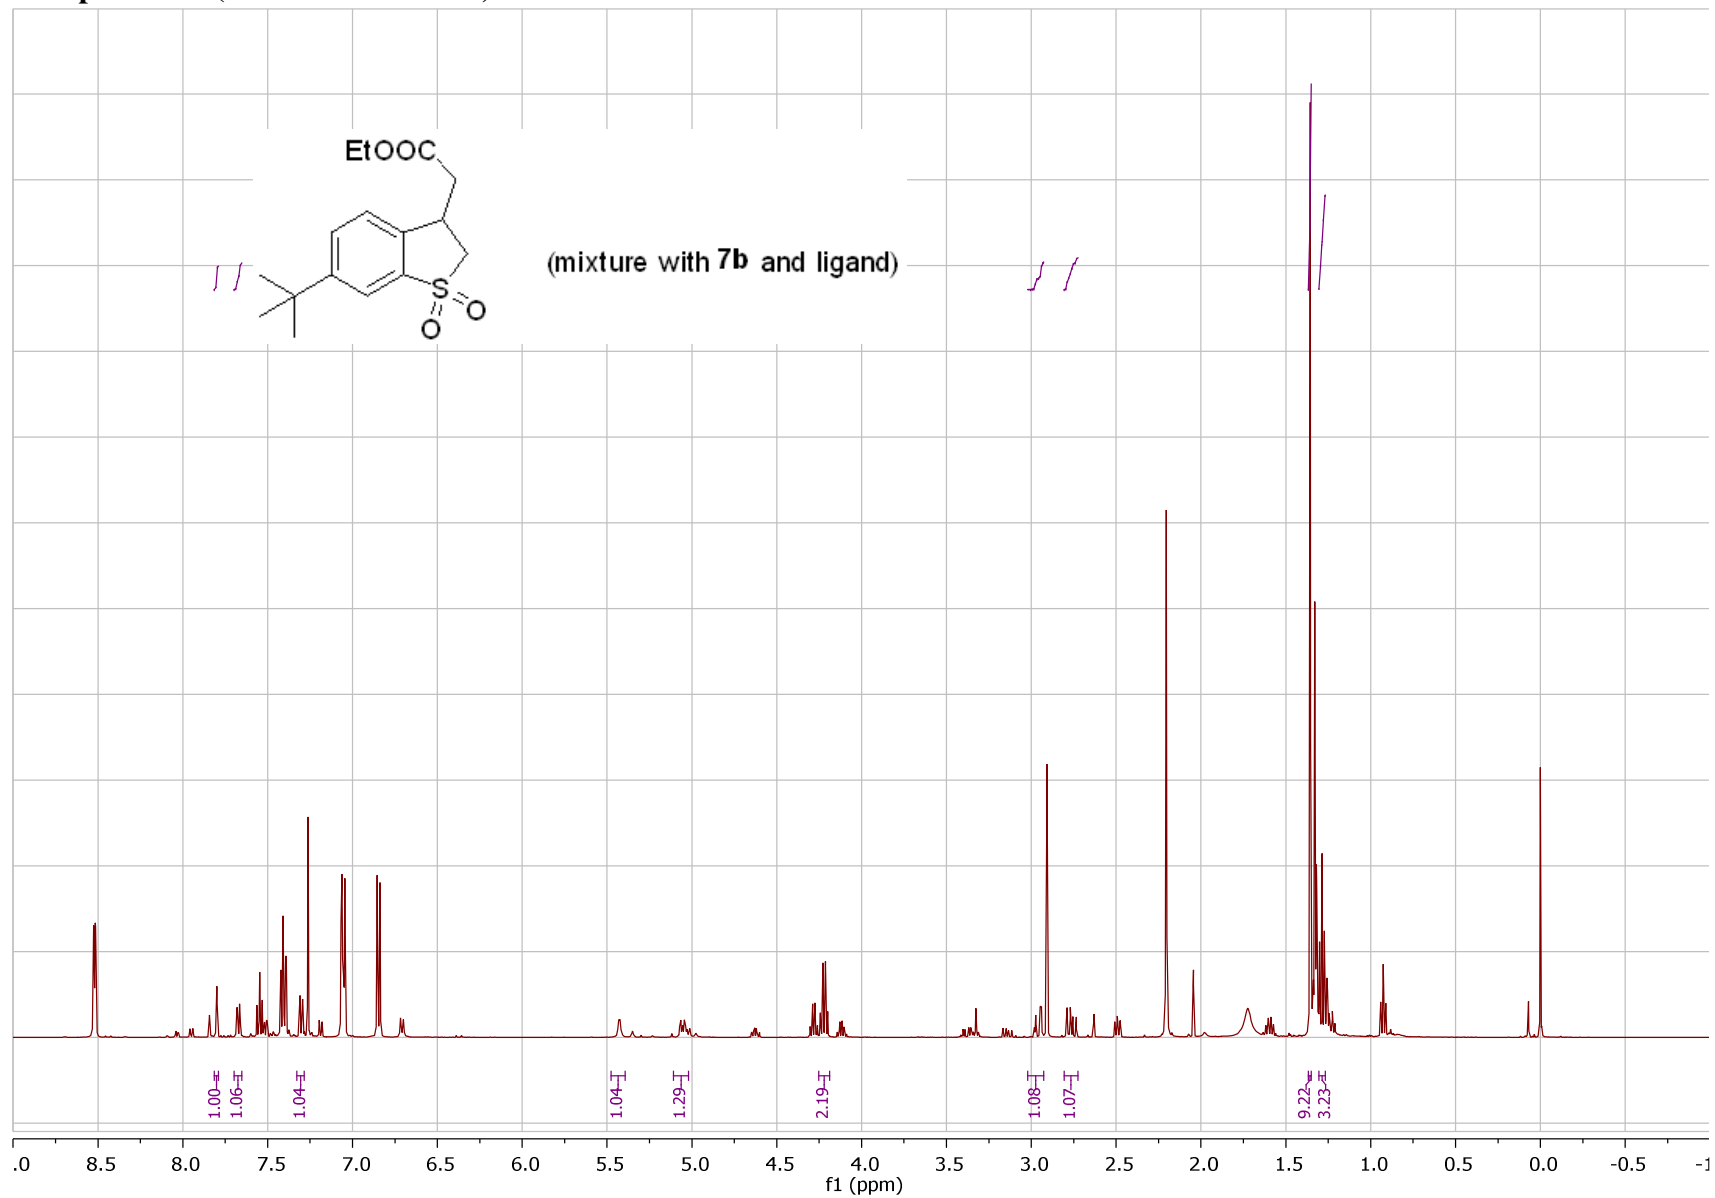

Compound 7a (isolated as mixture)

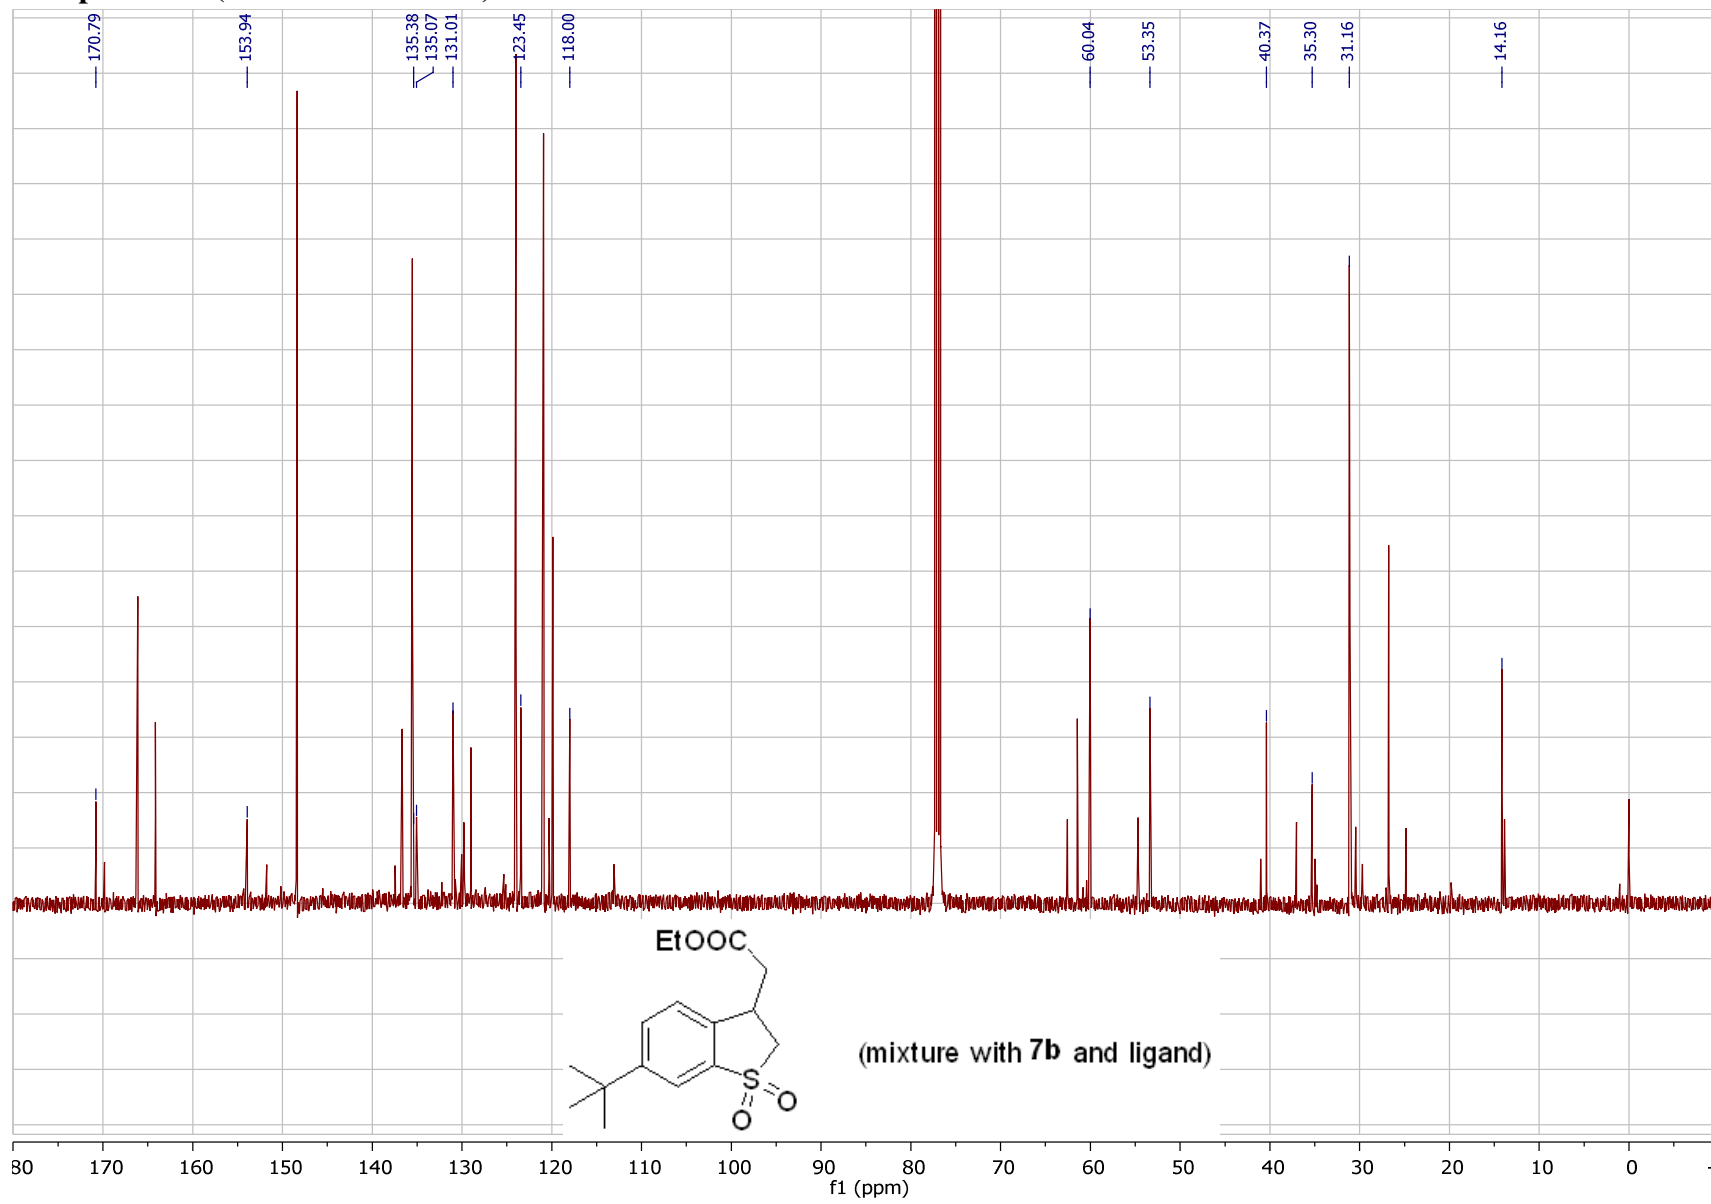

# Compound 7b

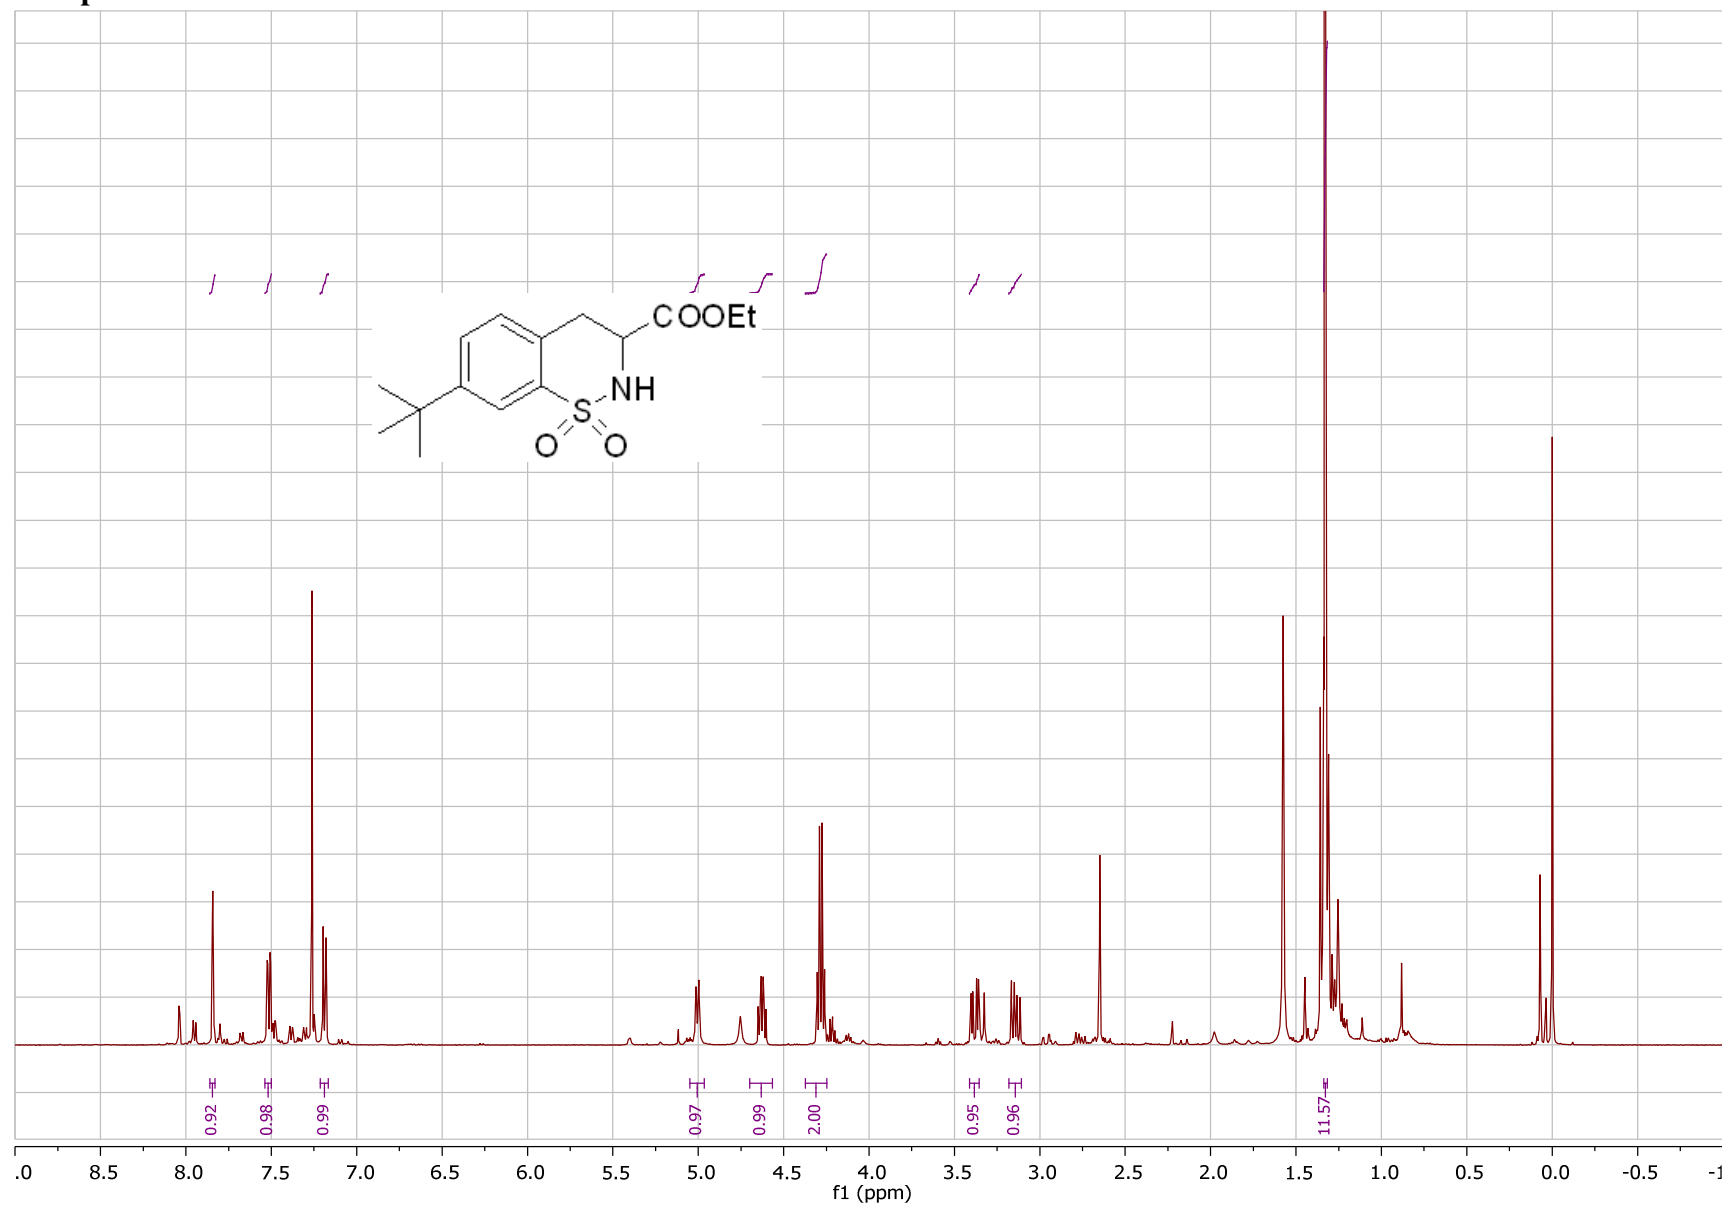

S2-72

# Compound 7b

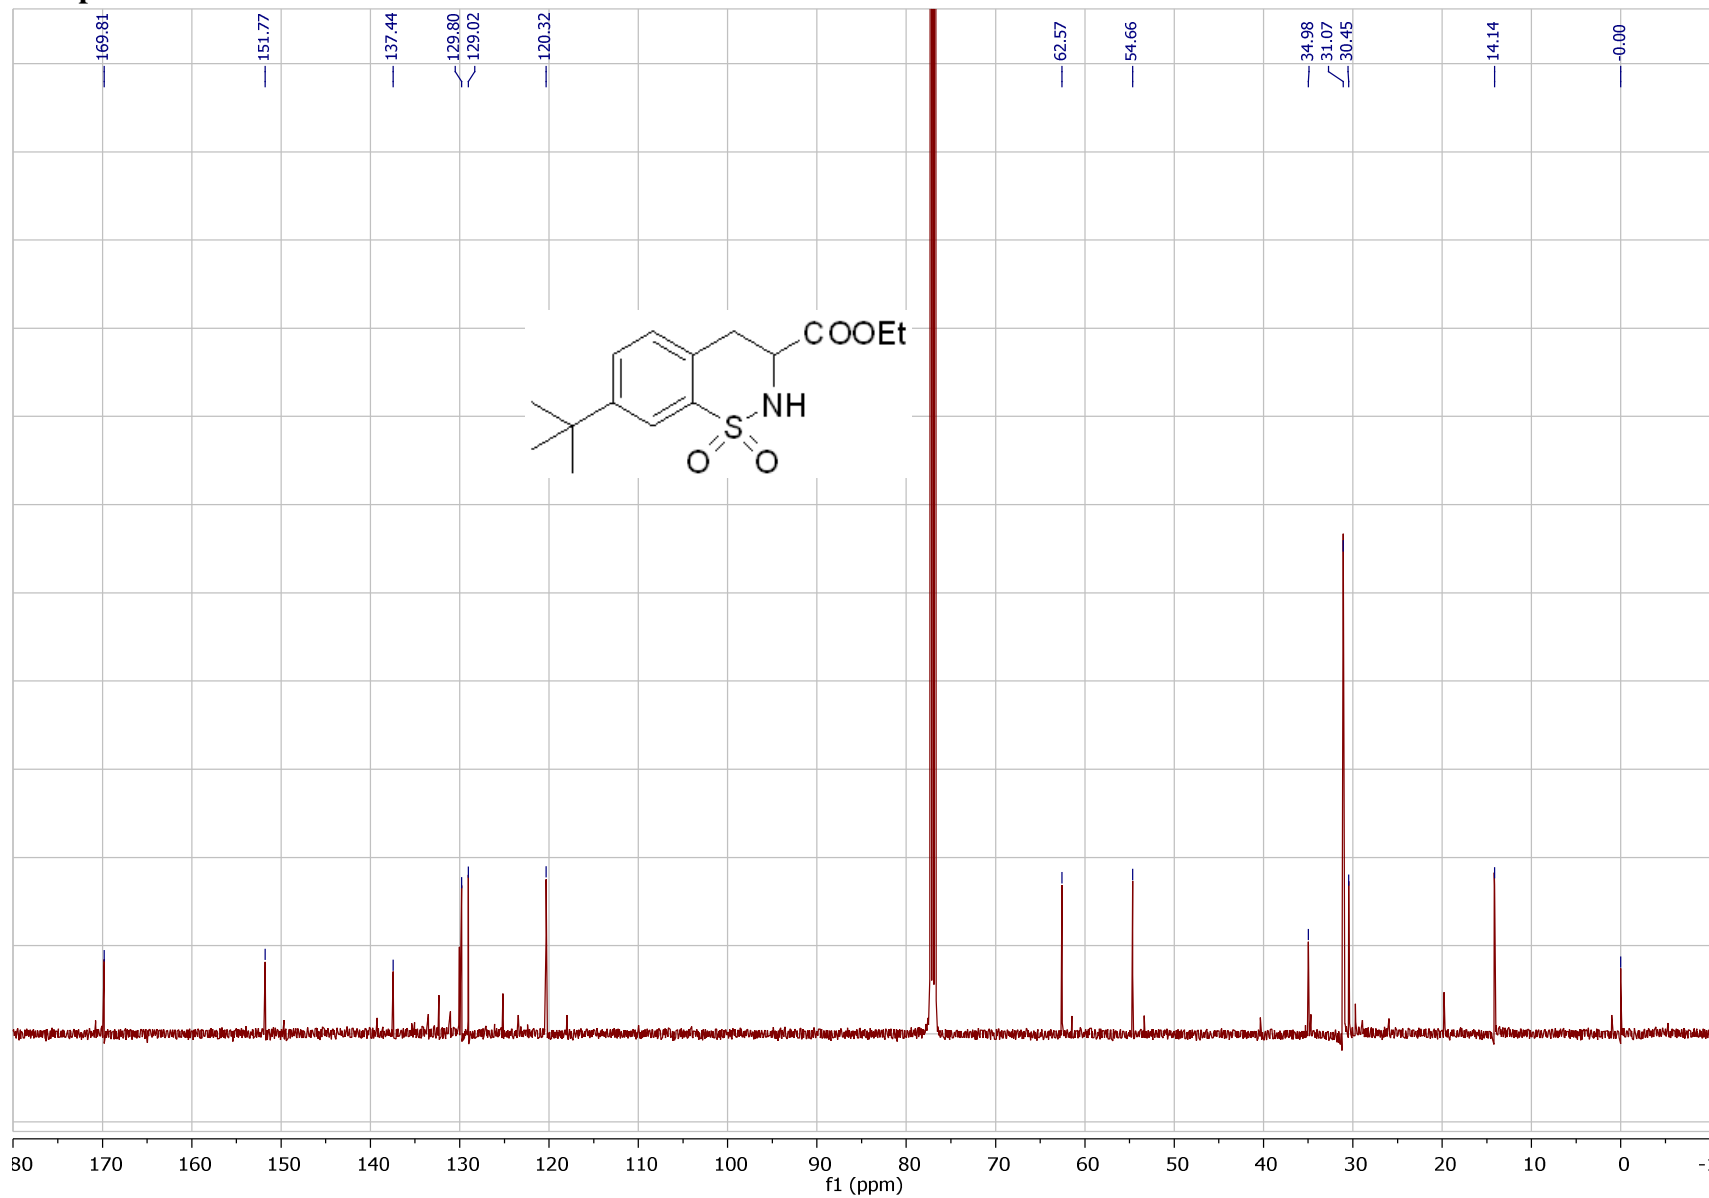

Compound 8a

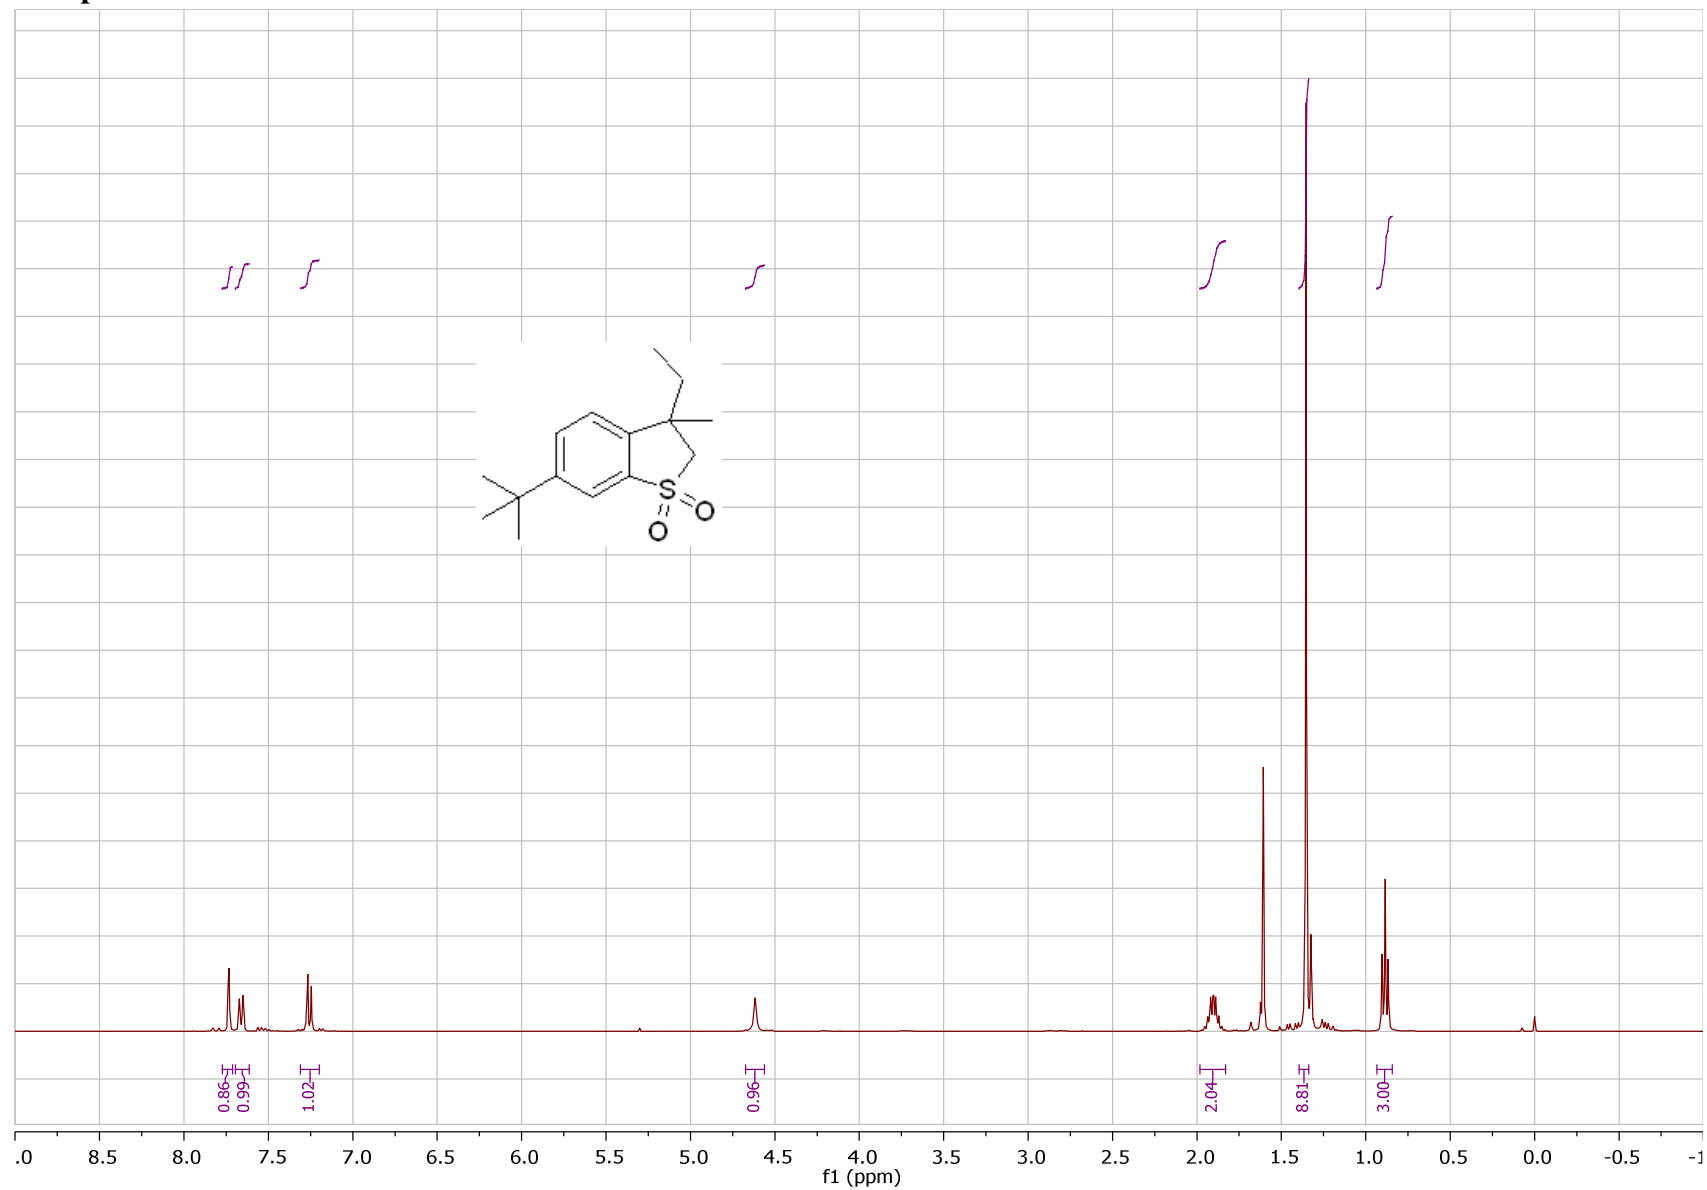

# Compound 8a

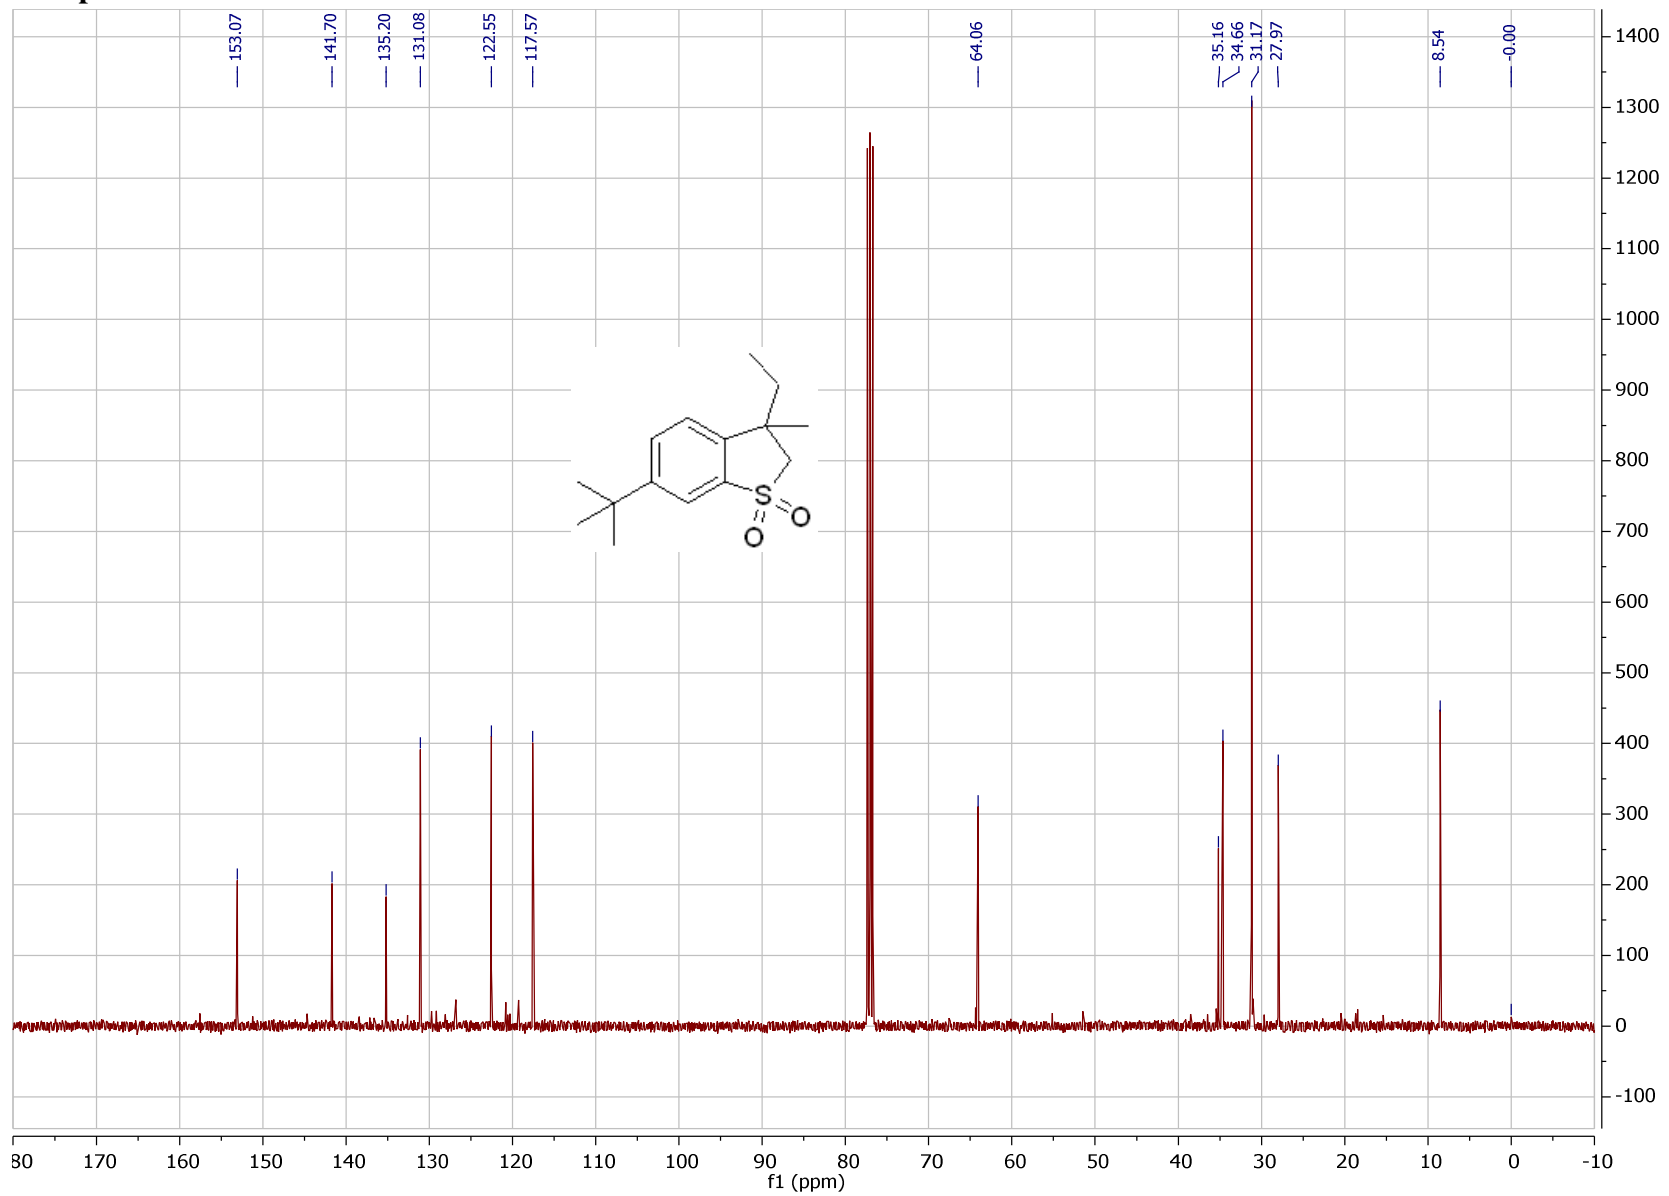

Compound 9a

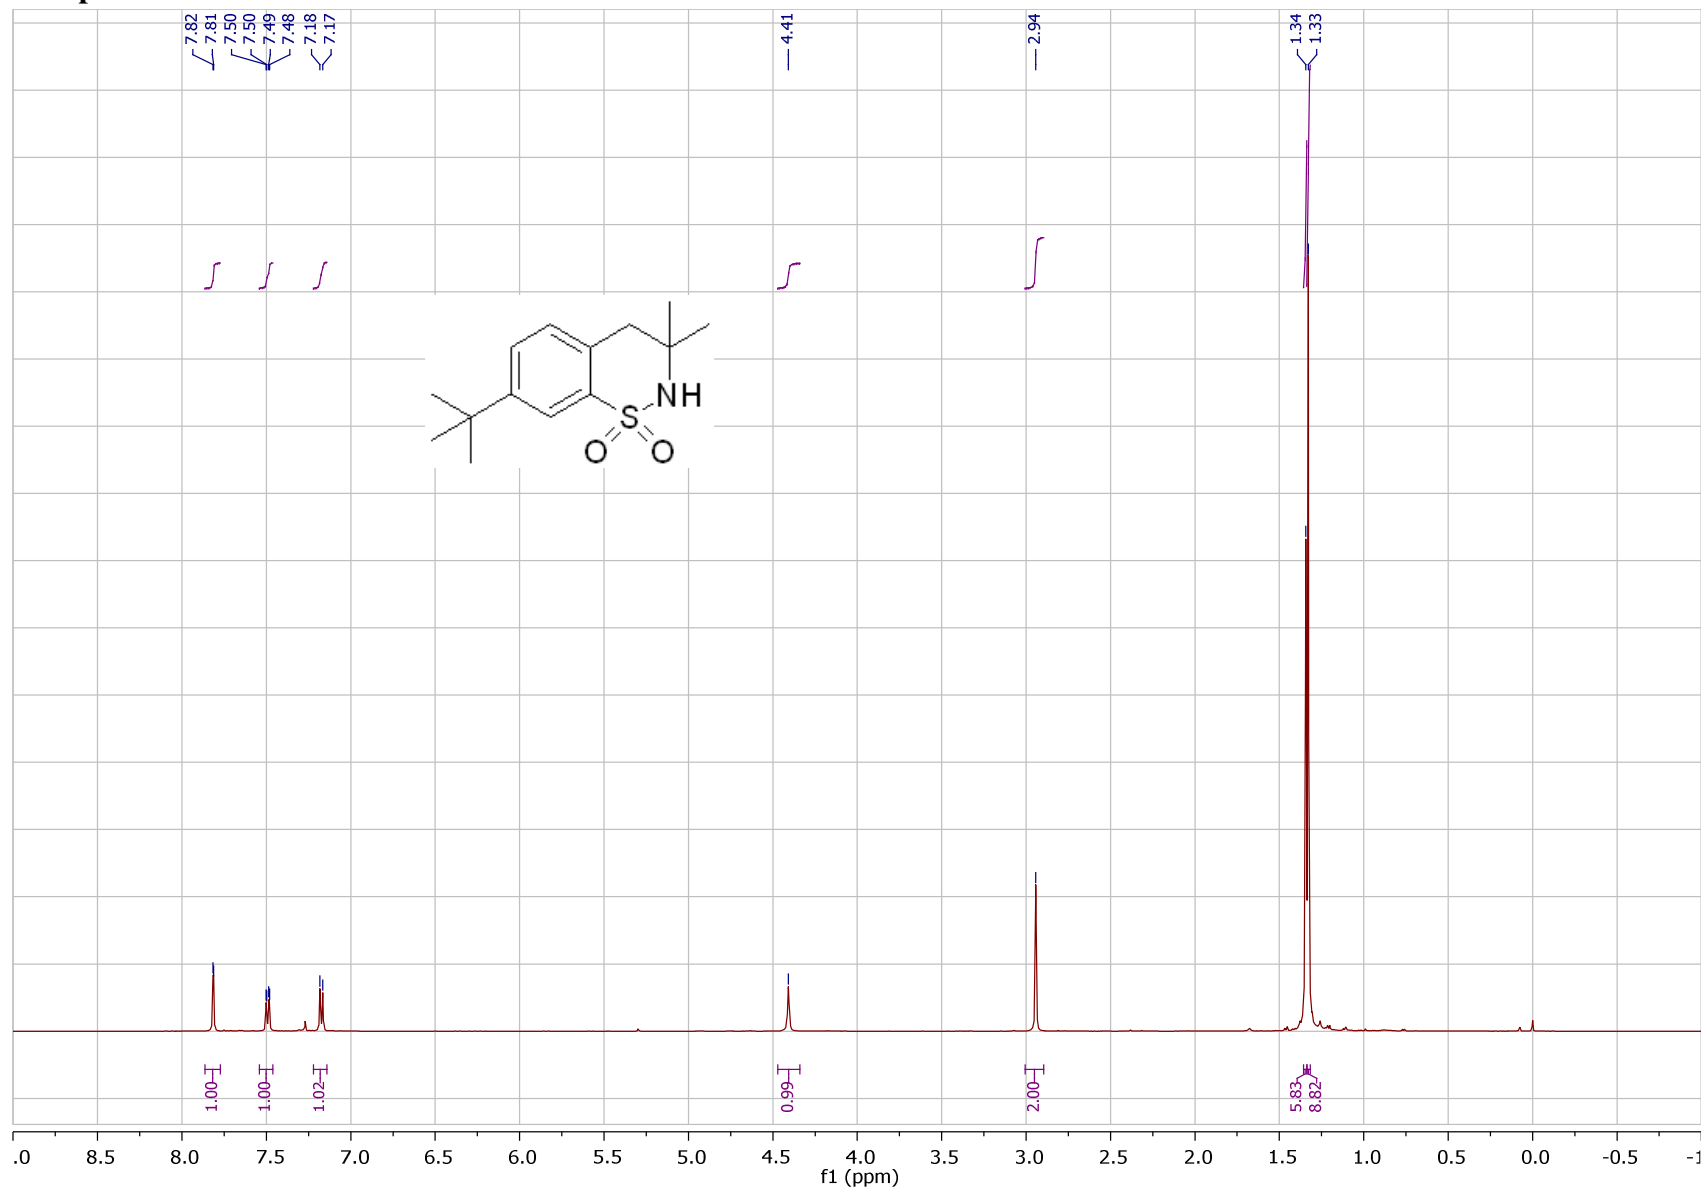

# Compound 9a

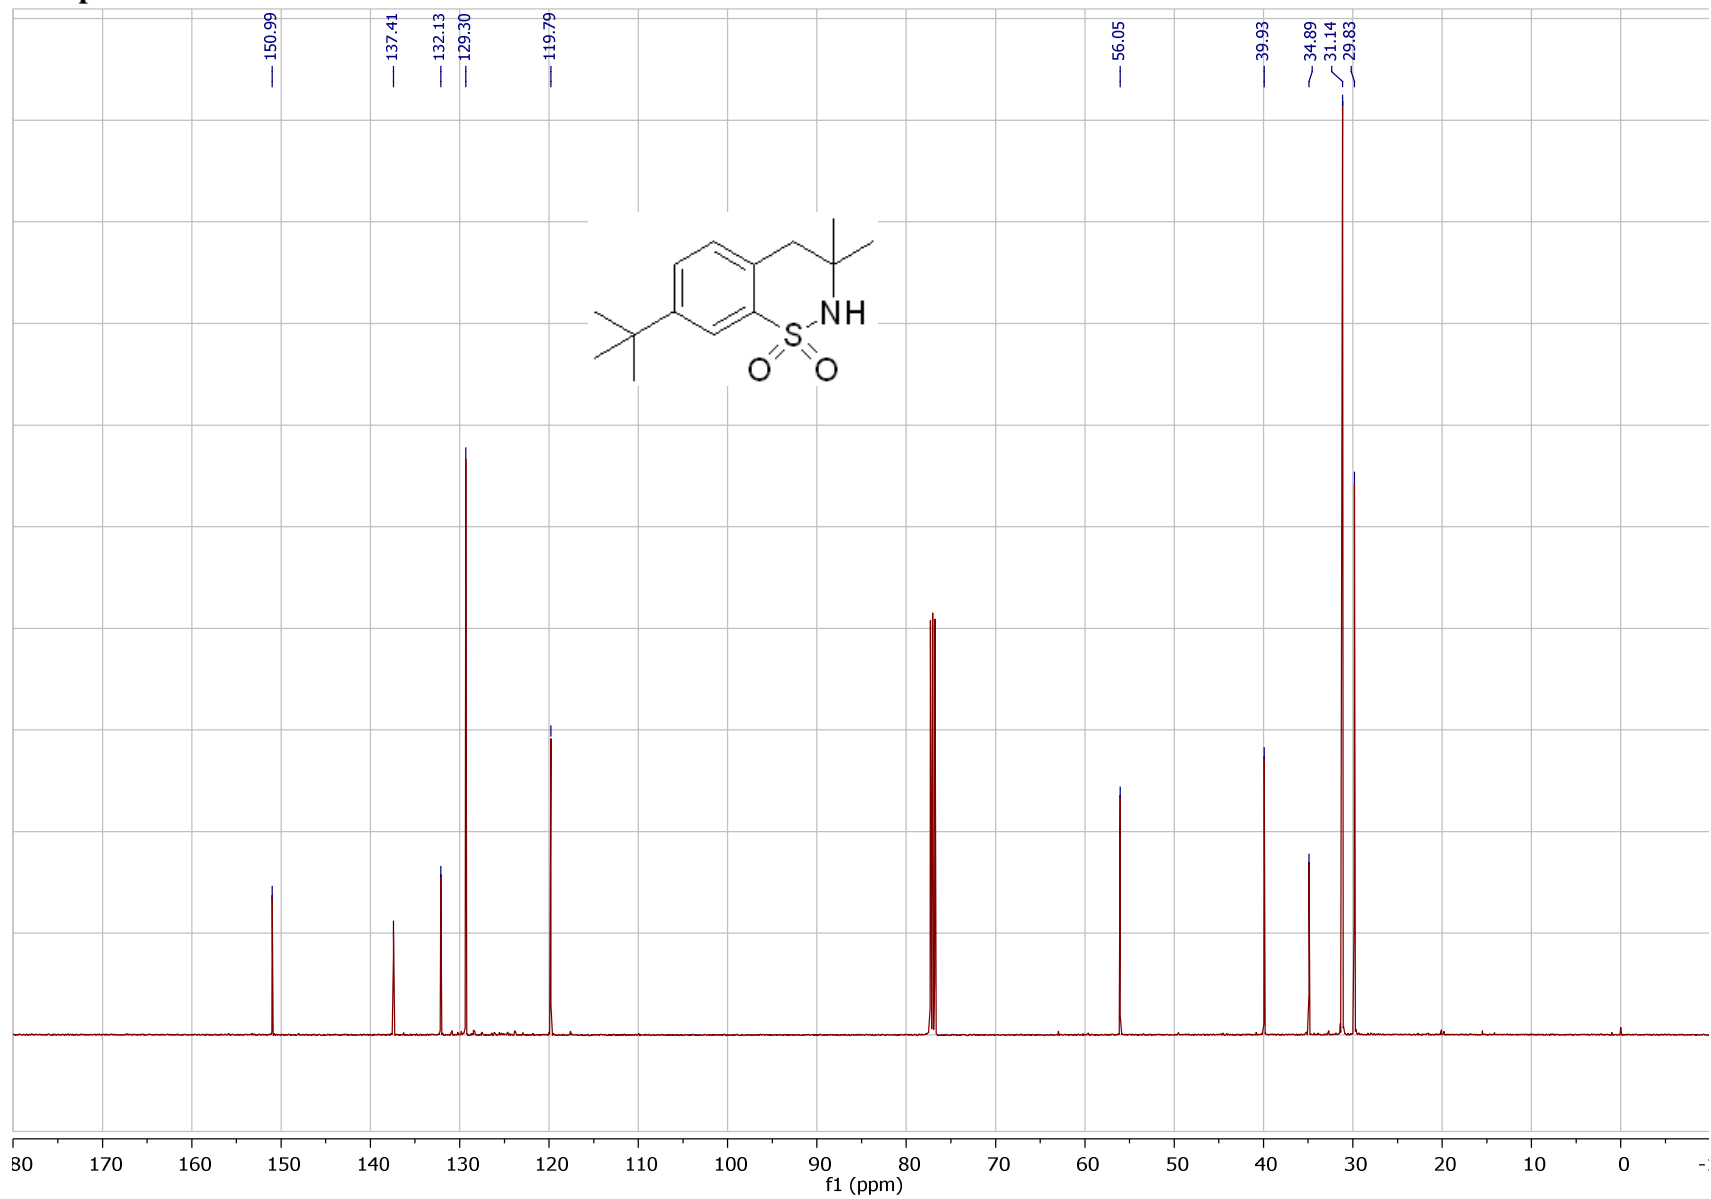

# Compound 10a and 10b

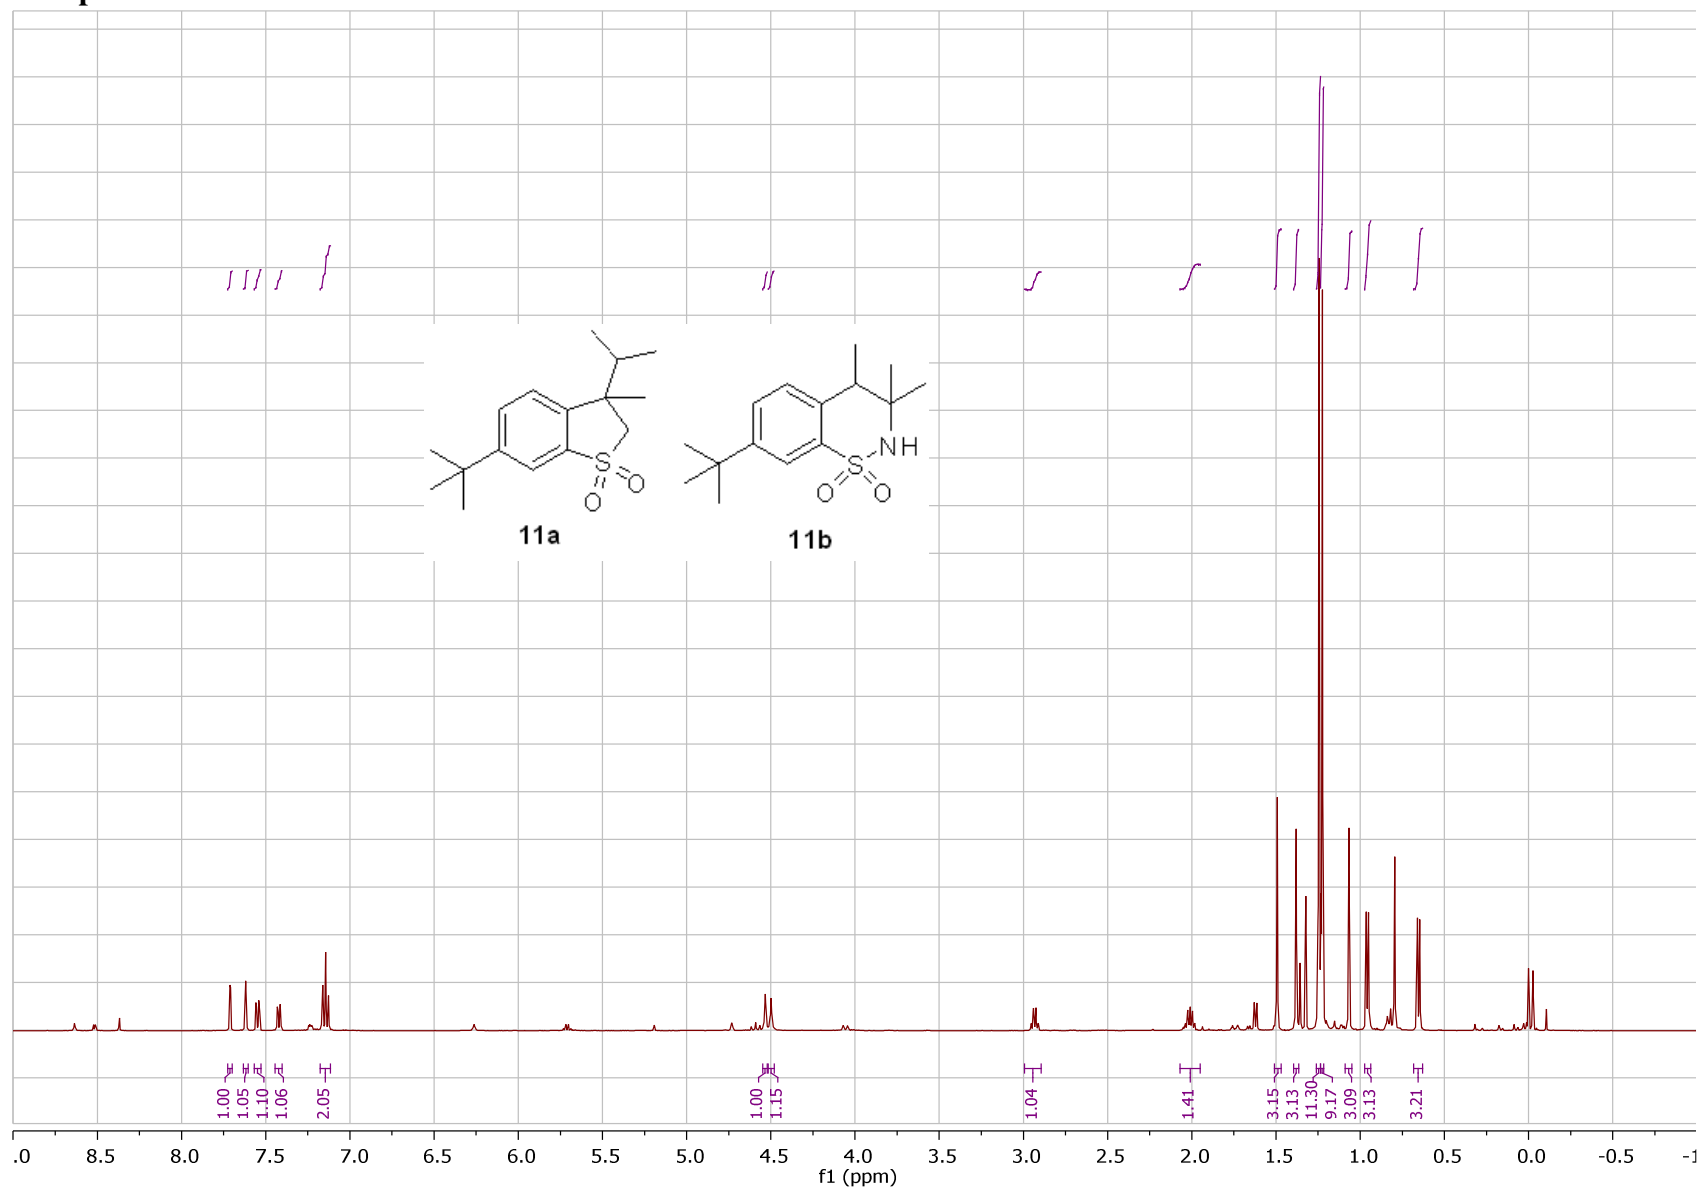

# Compound 10a and 10b

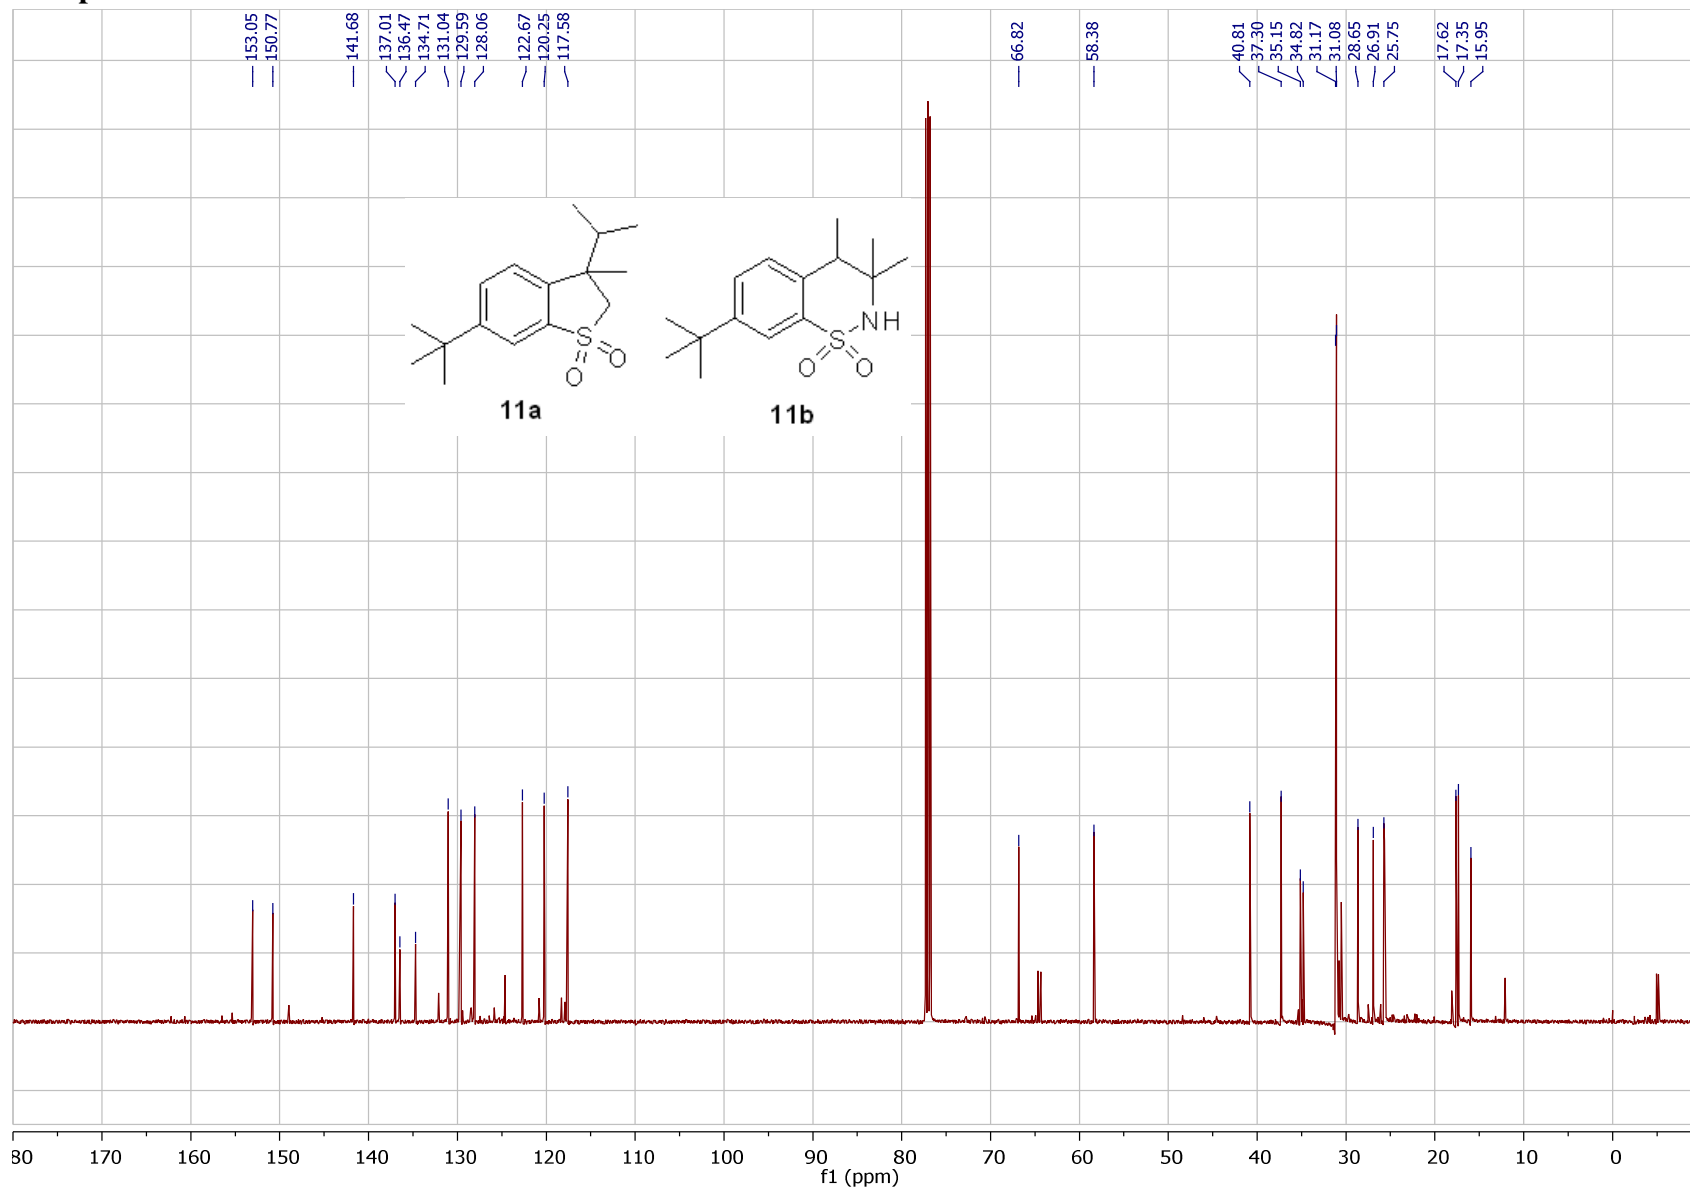

## Compound 10a and 10b-HSQC

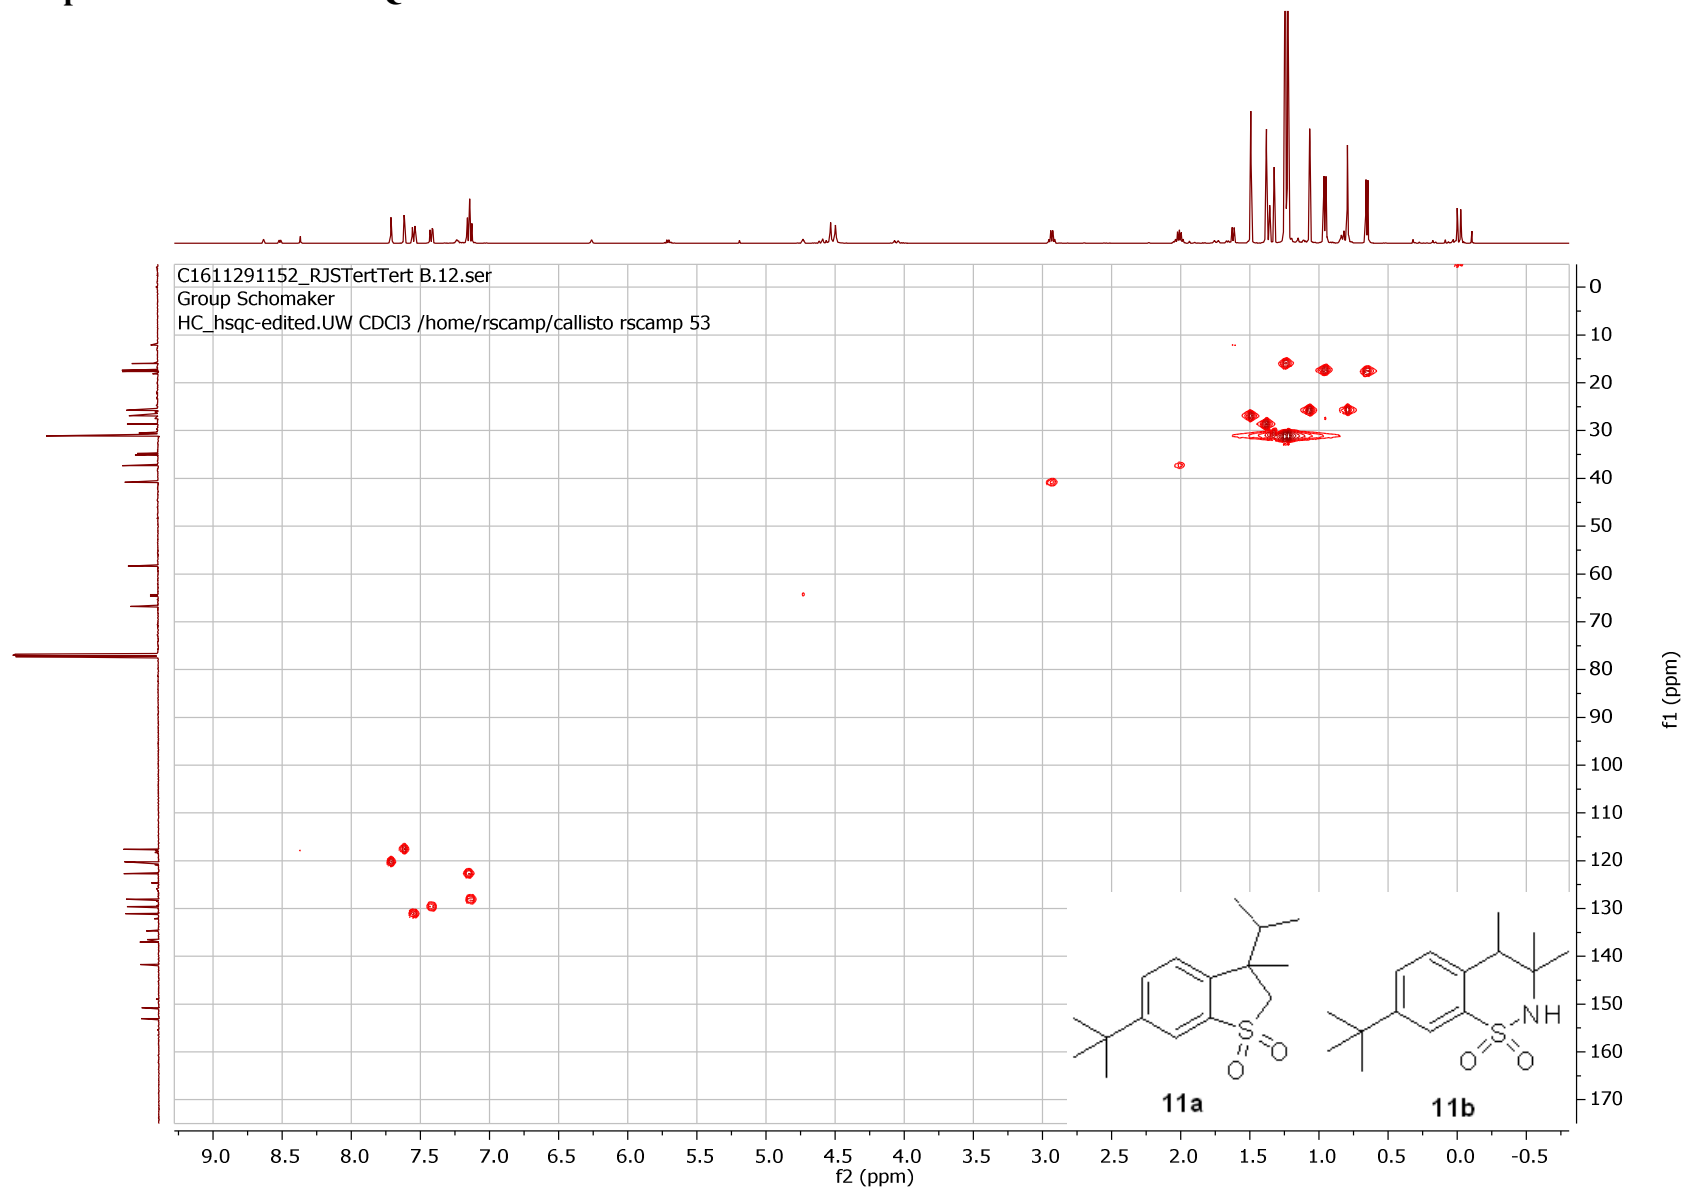

## Compound 10a and 10b-HMBC

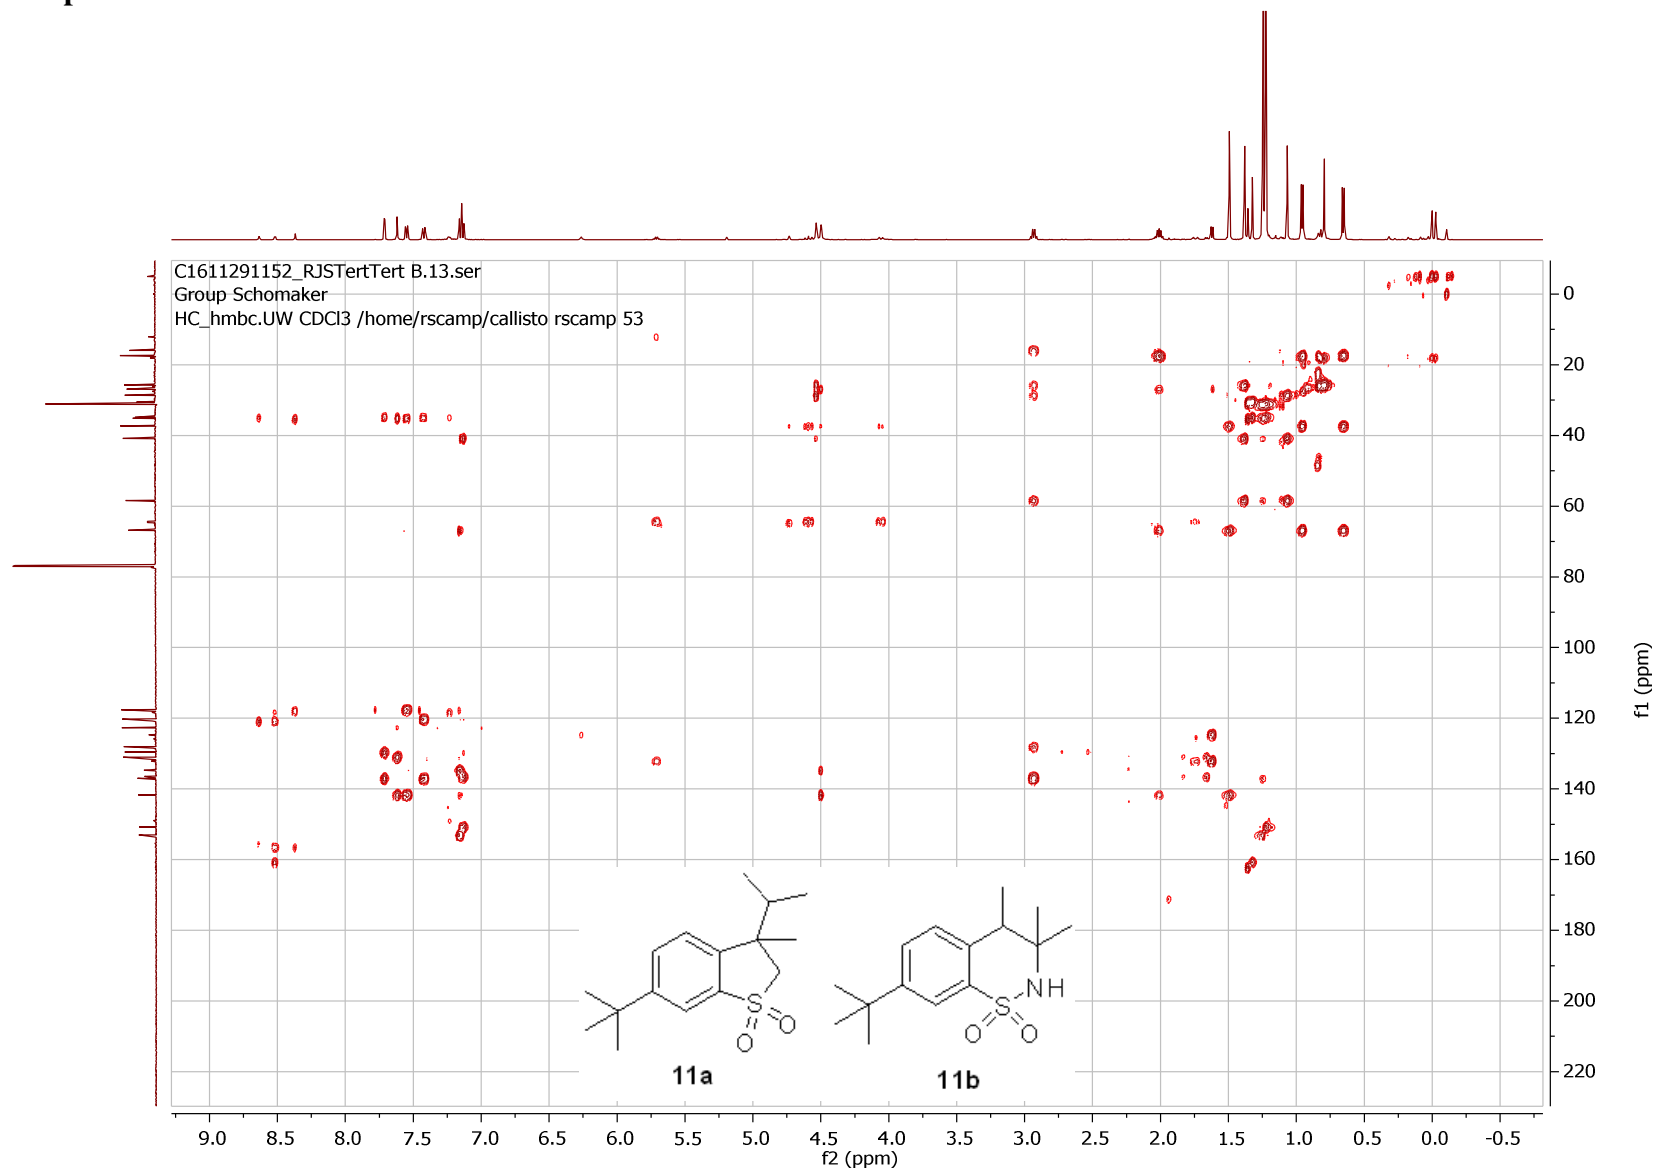

# Compound 11a

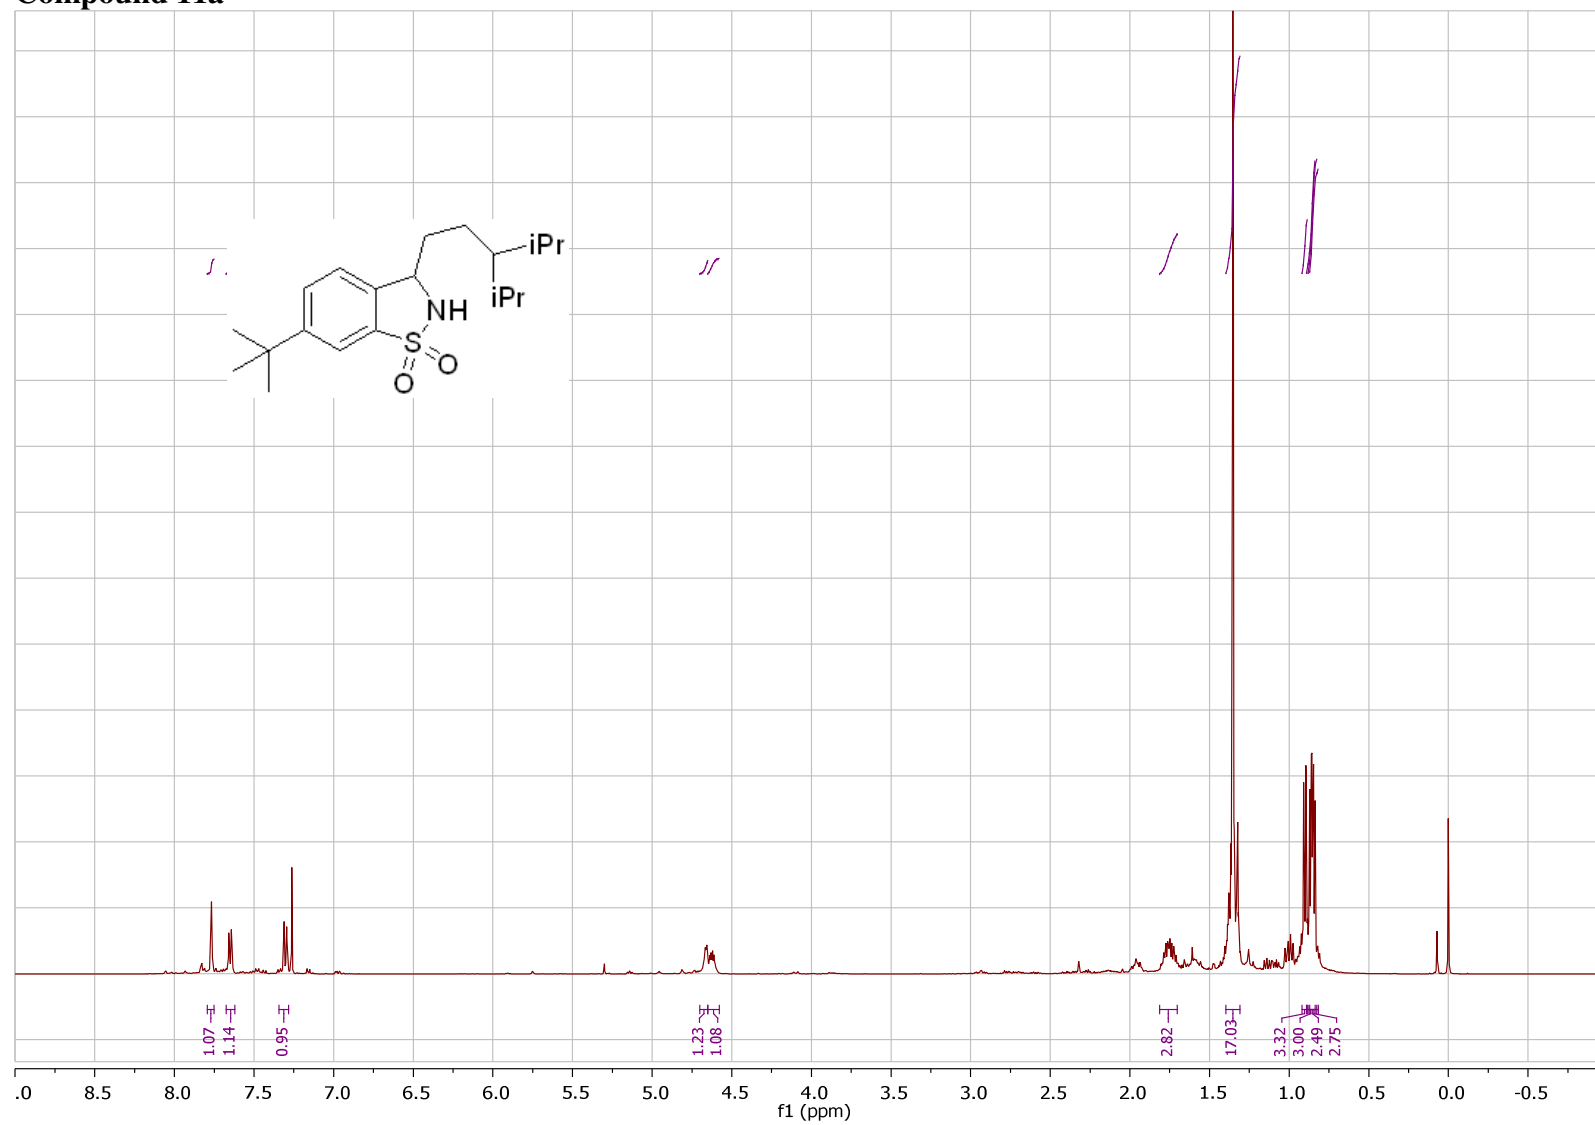

# Compound 11a

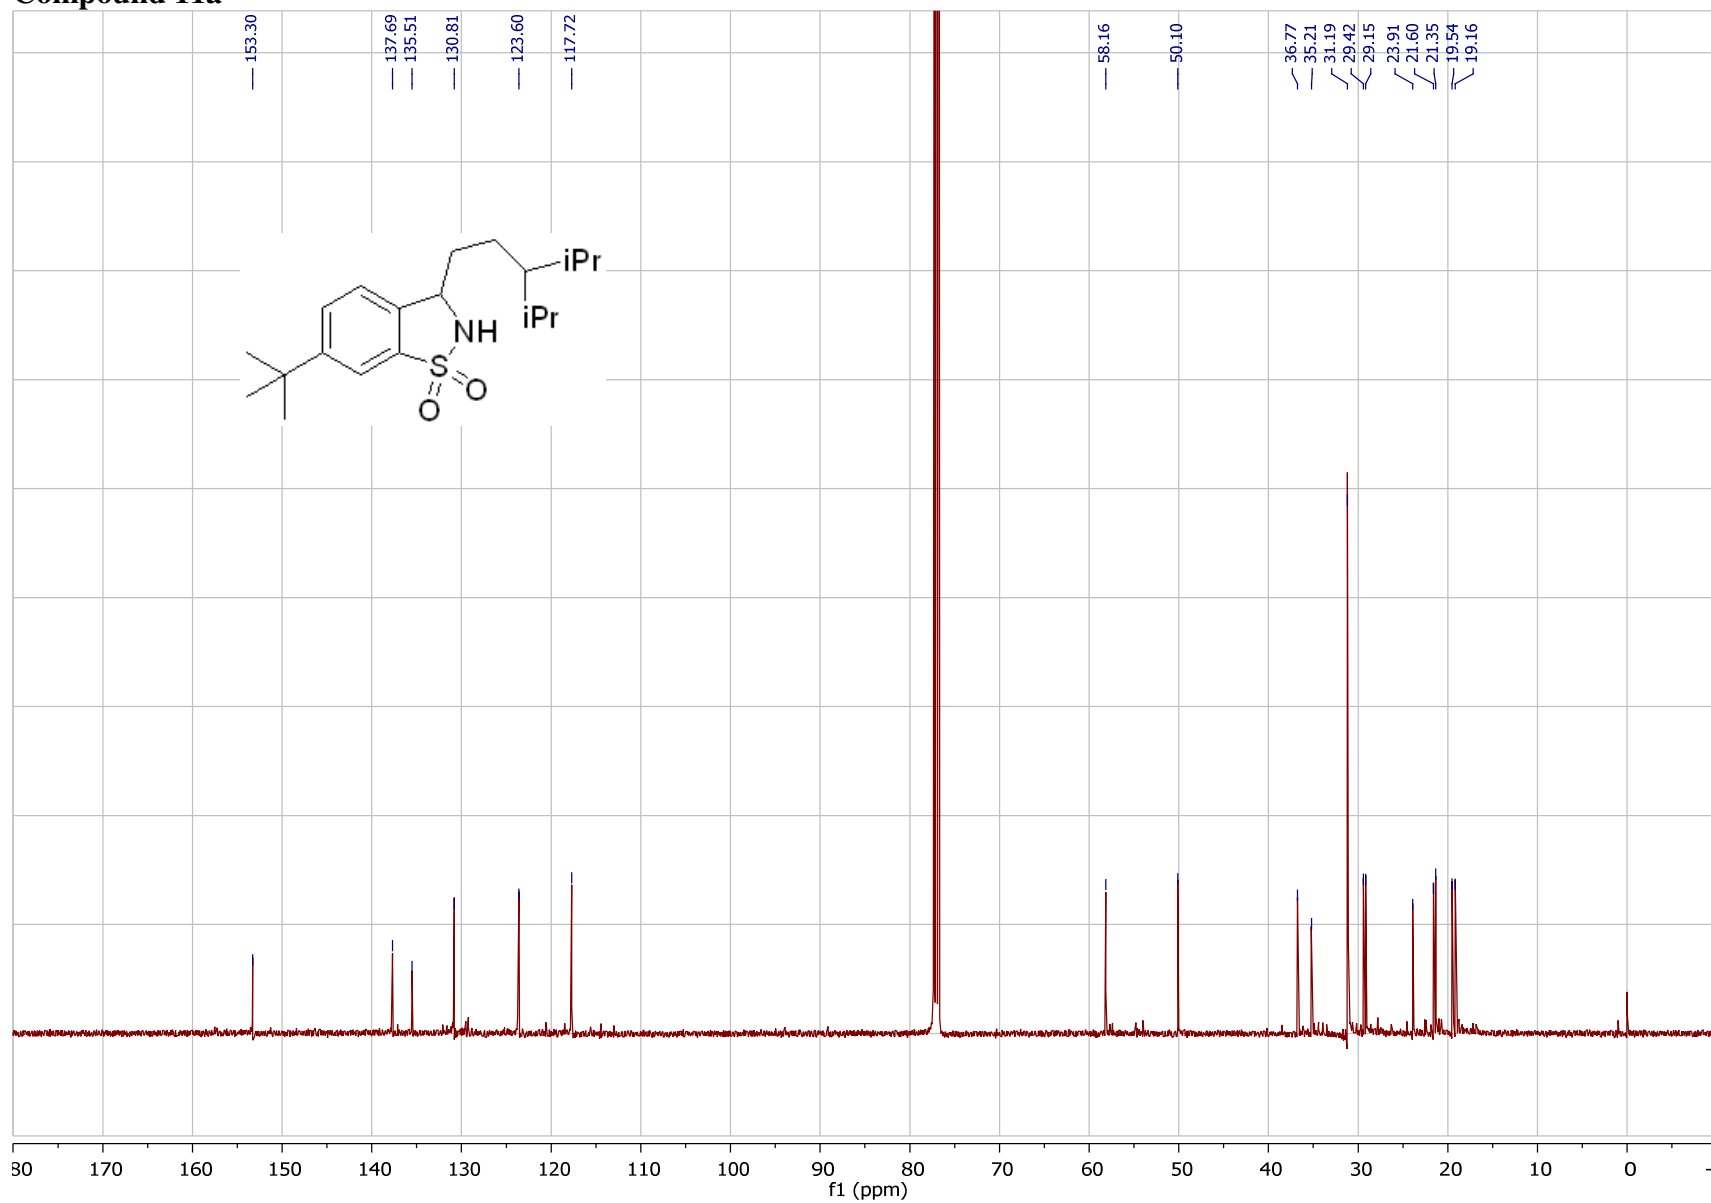

# Compound 11b

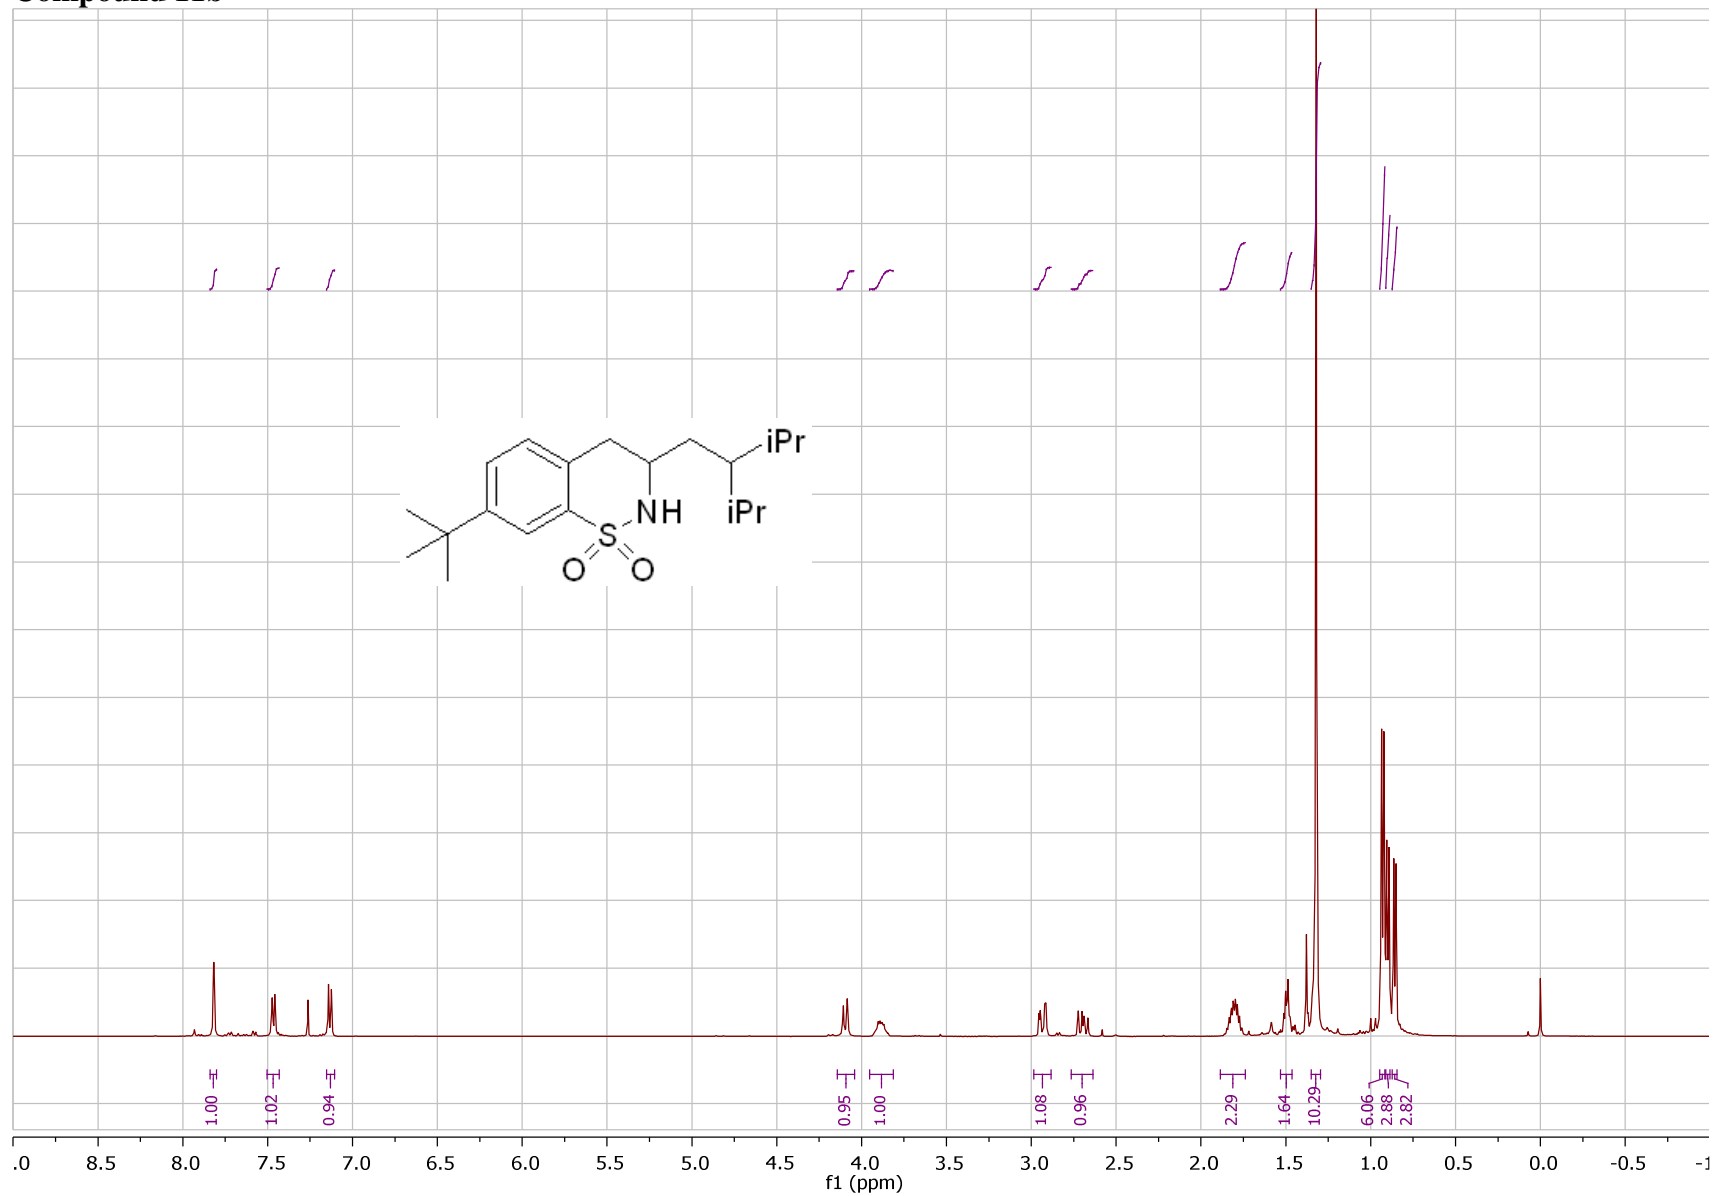

# Compound 11b

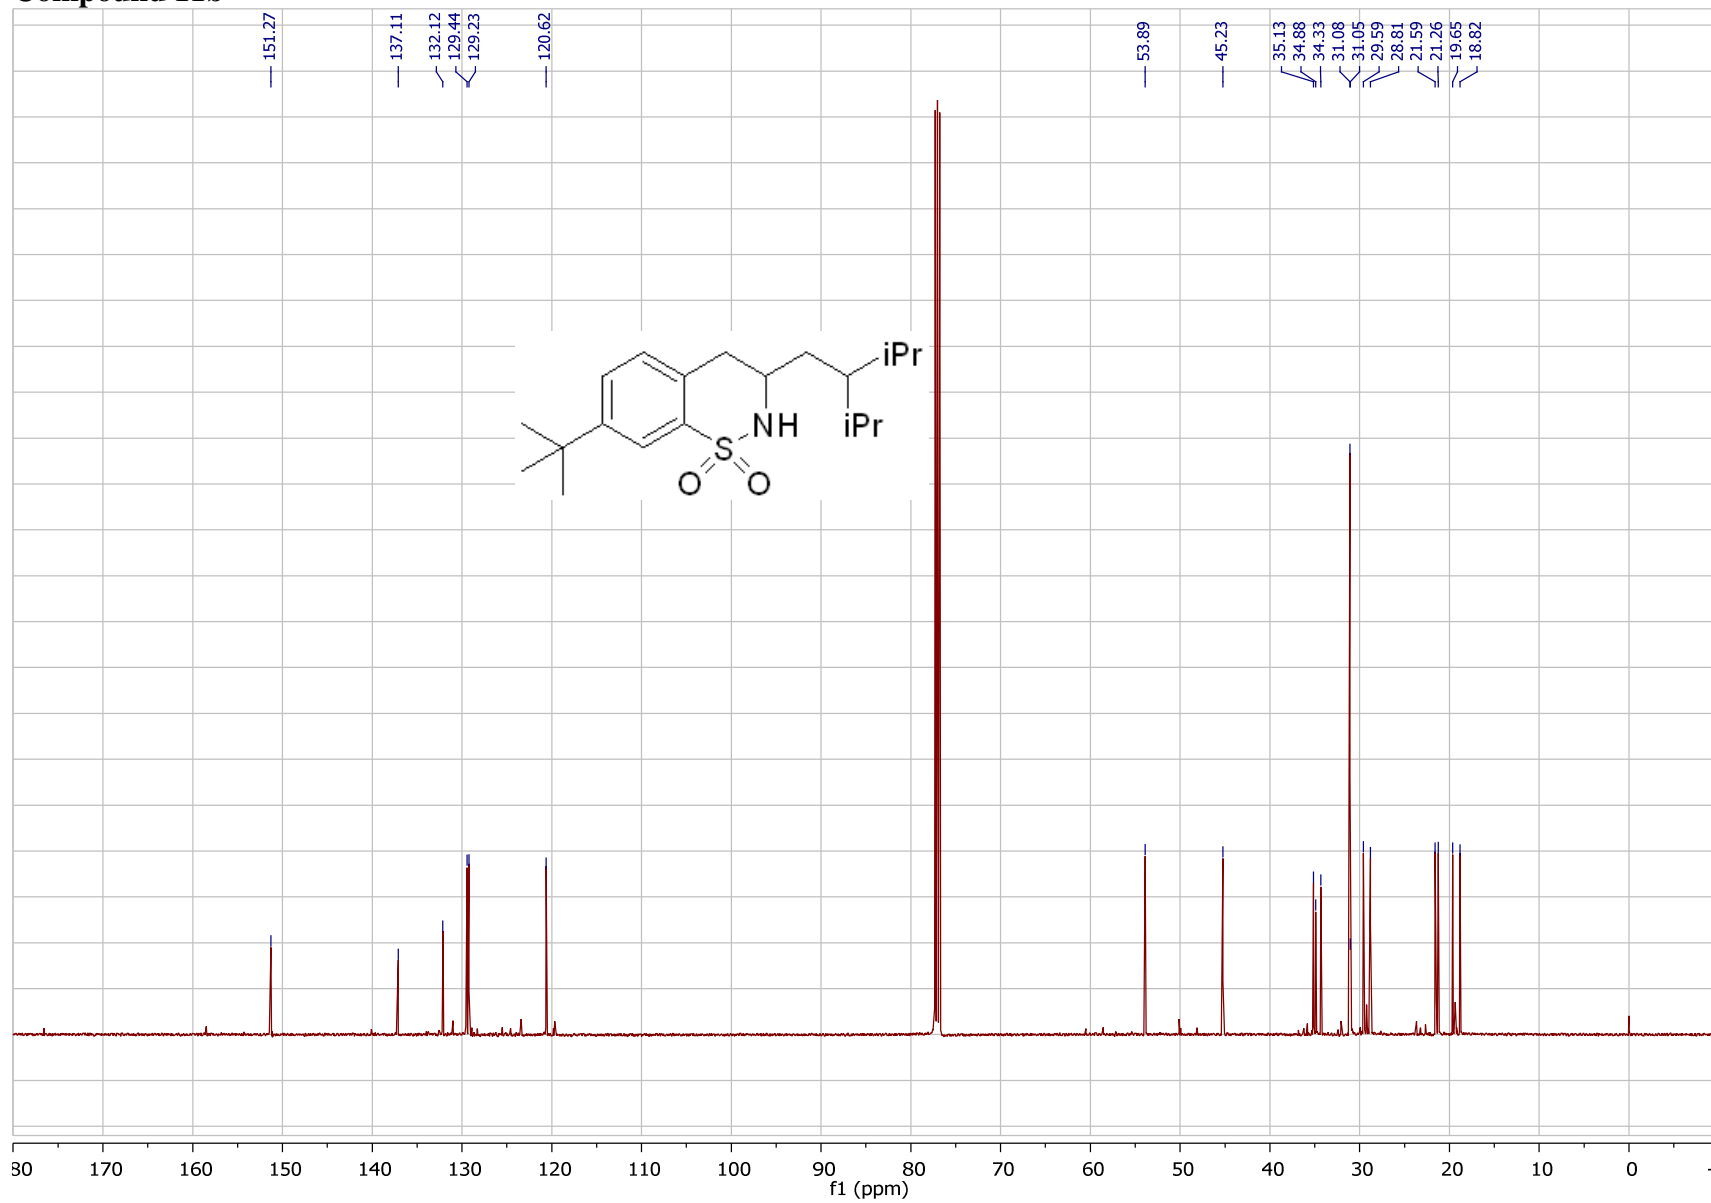

# Compound 12a

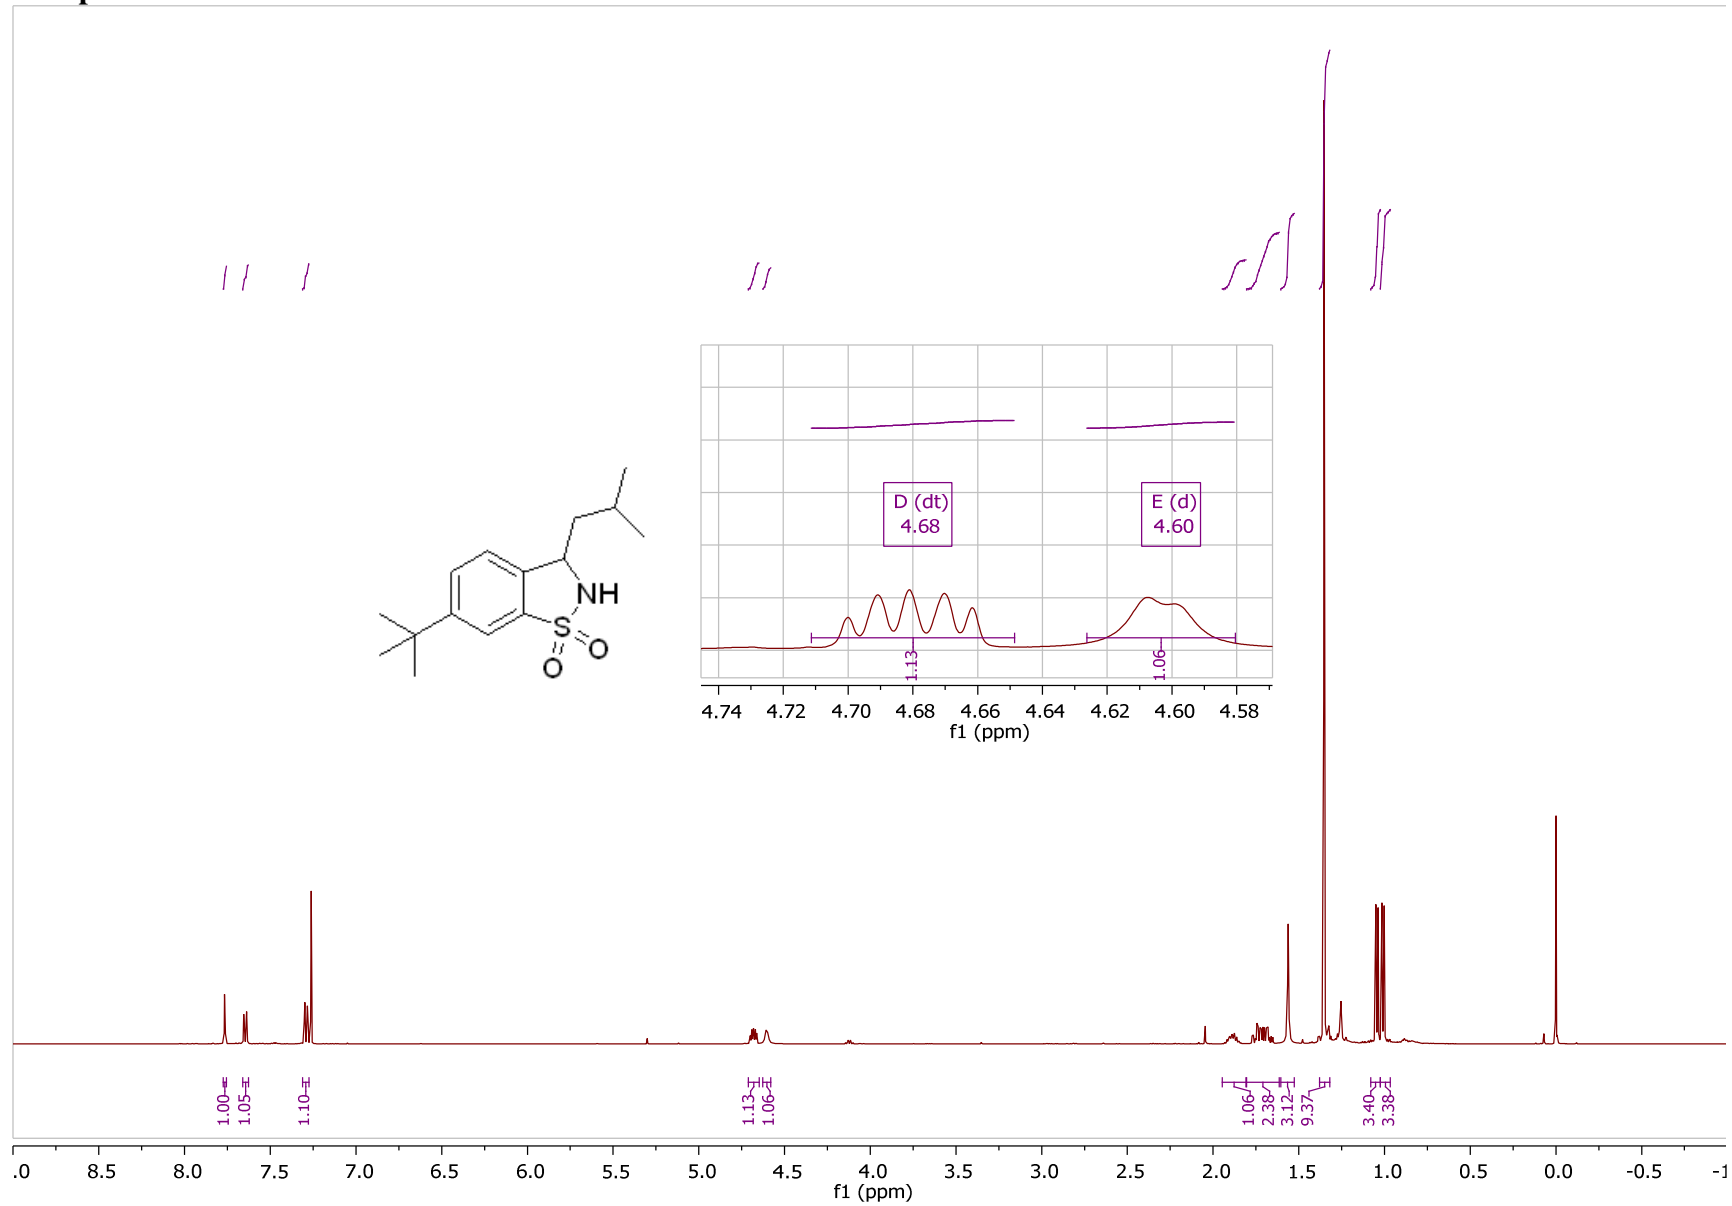

# Compound 12a

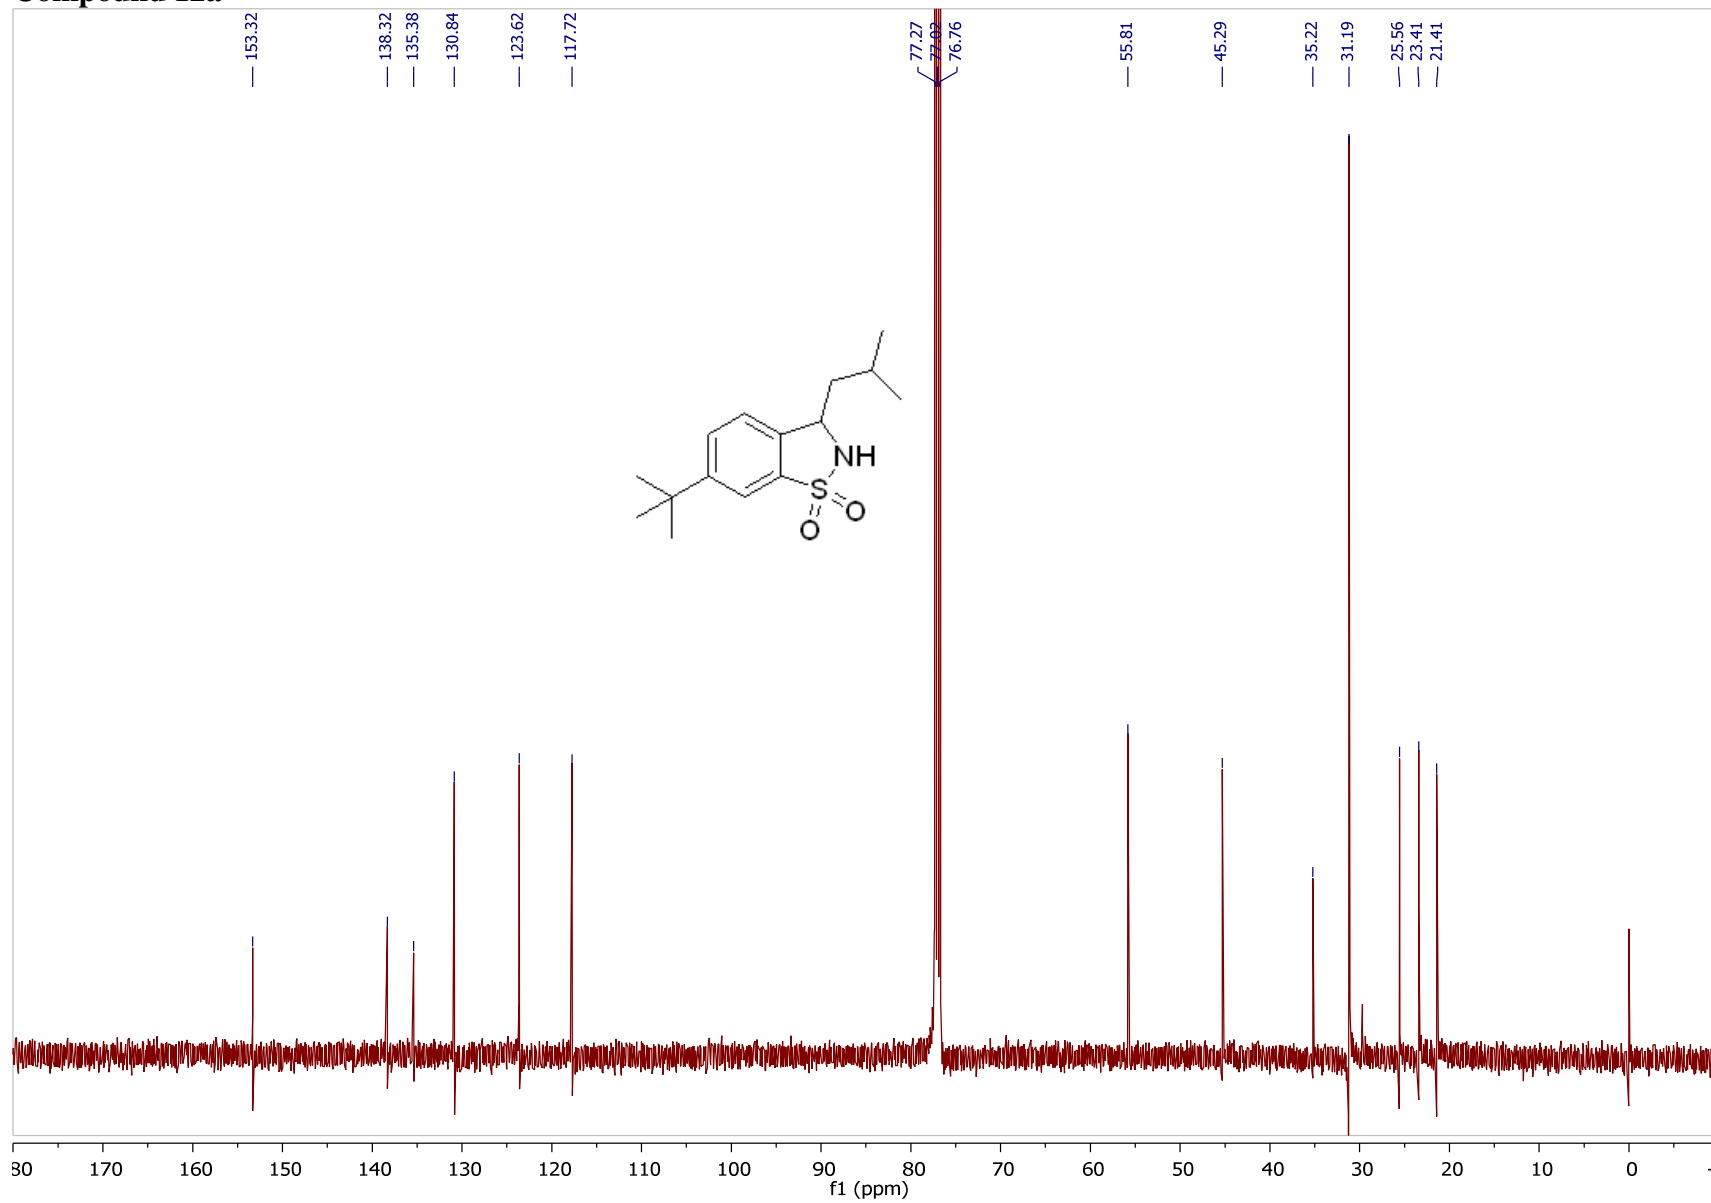

# Compound 12b

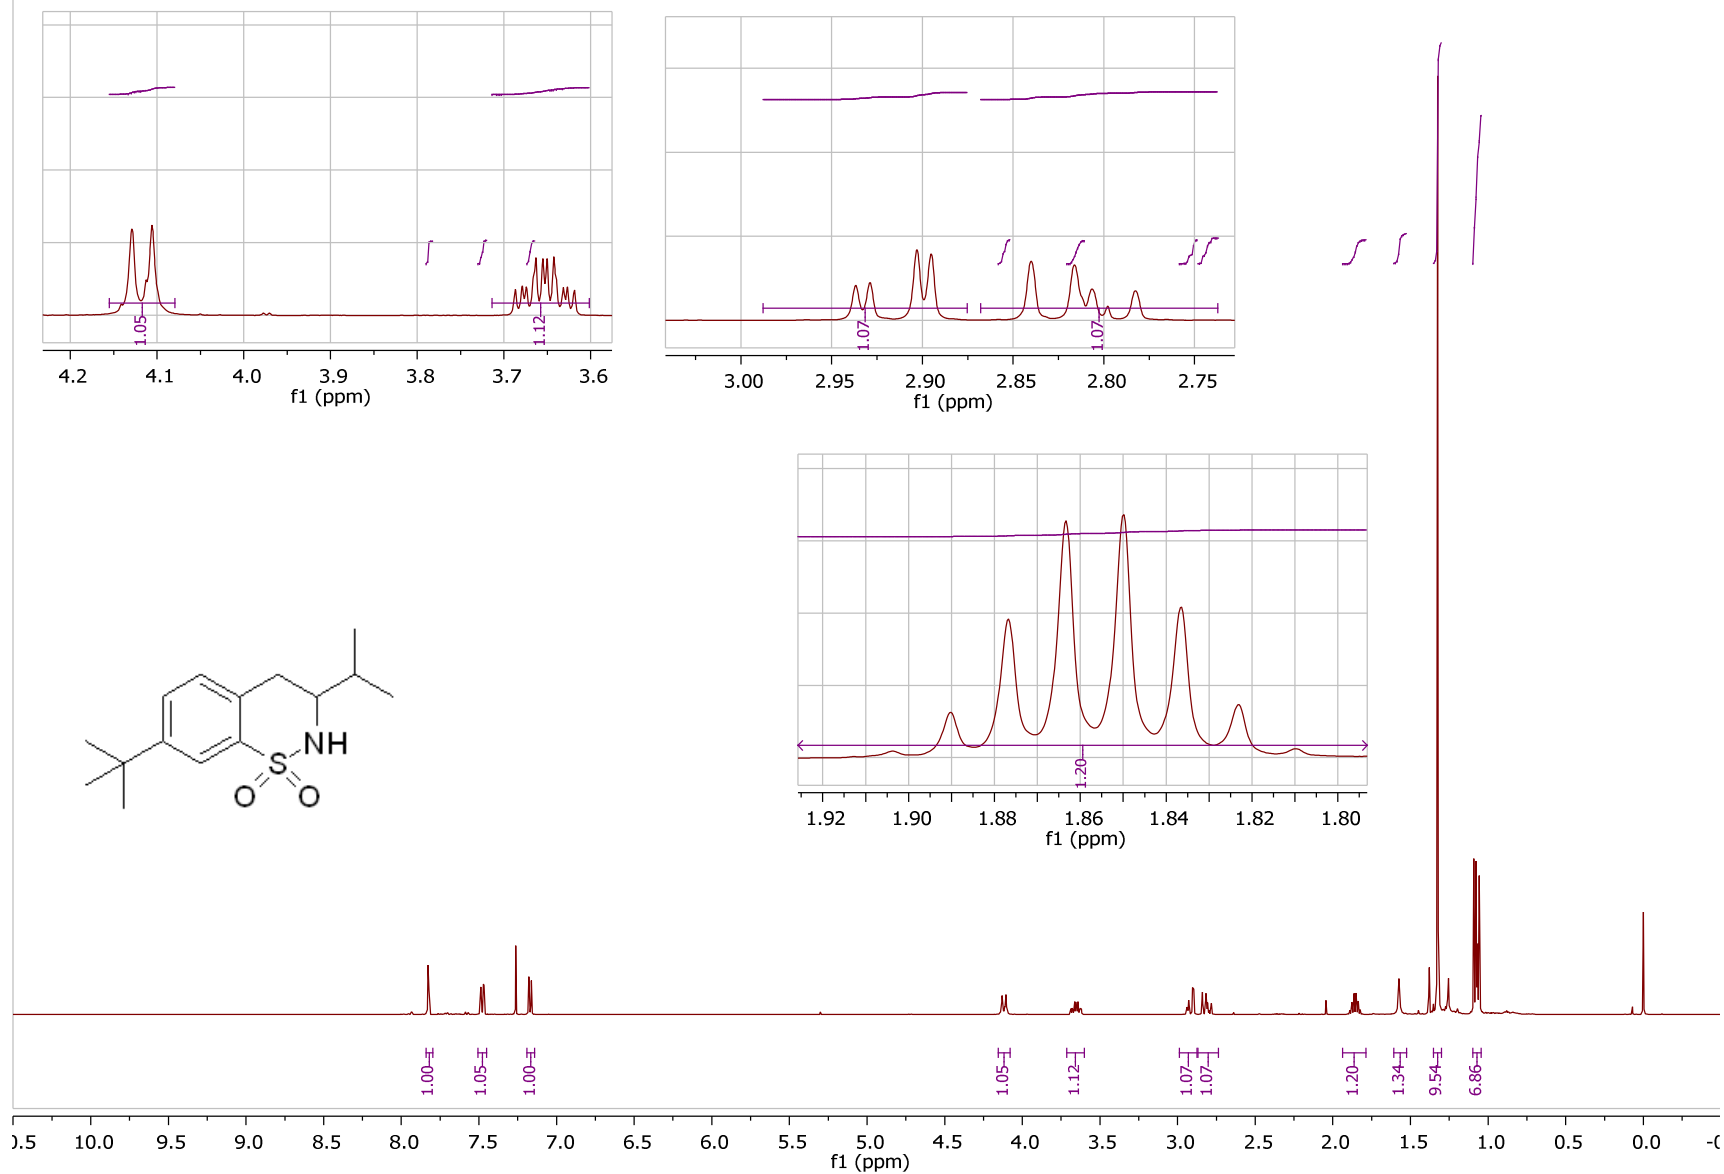

# Compound 12b

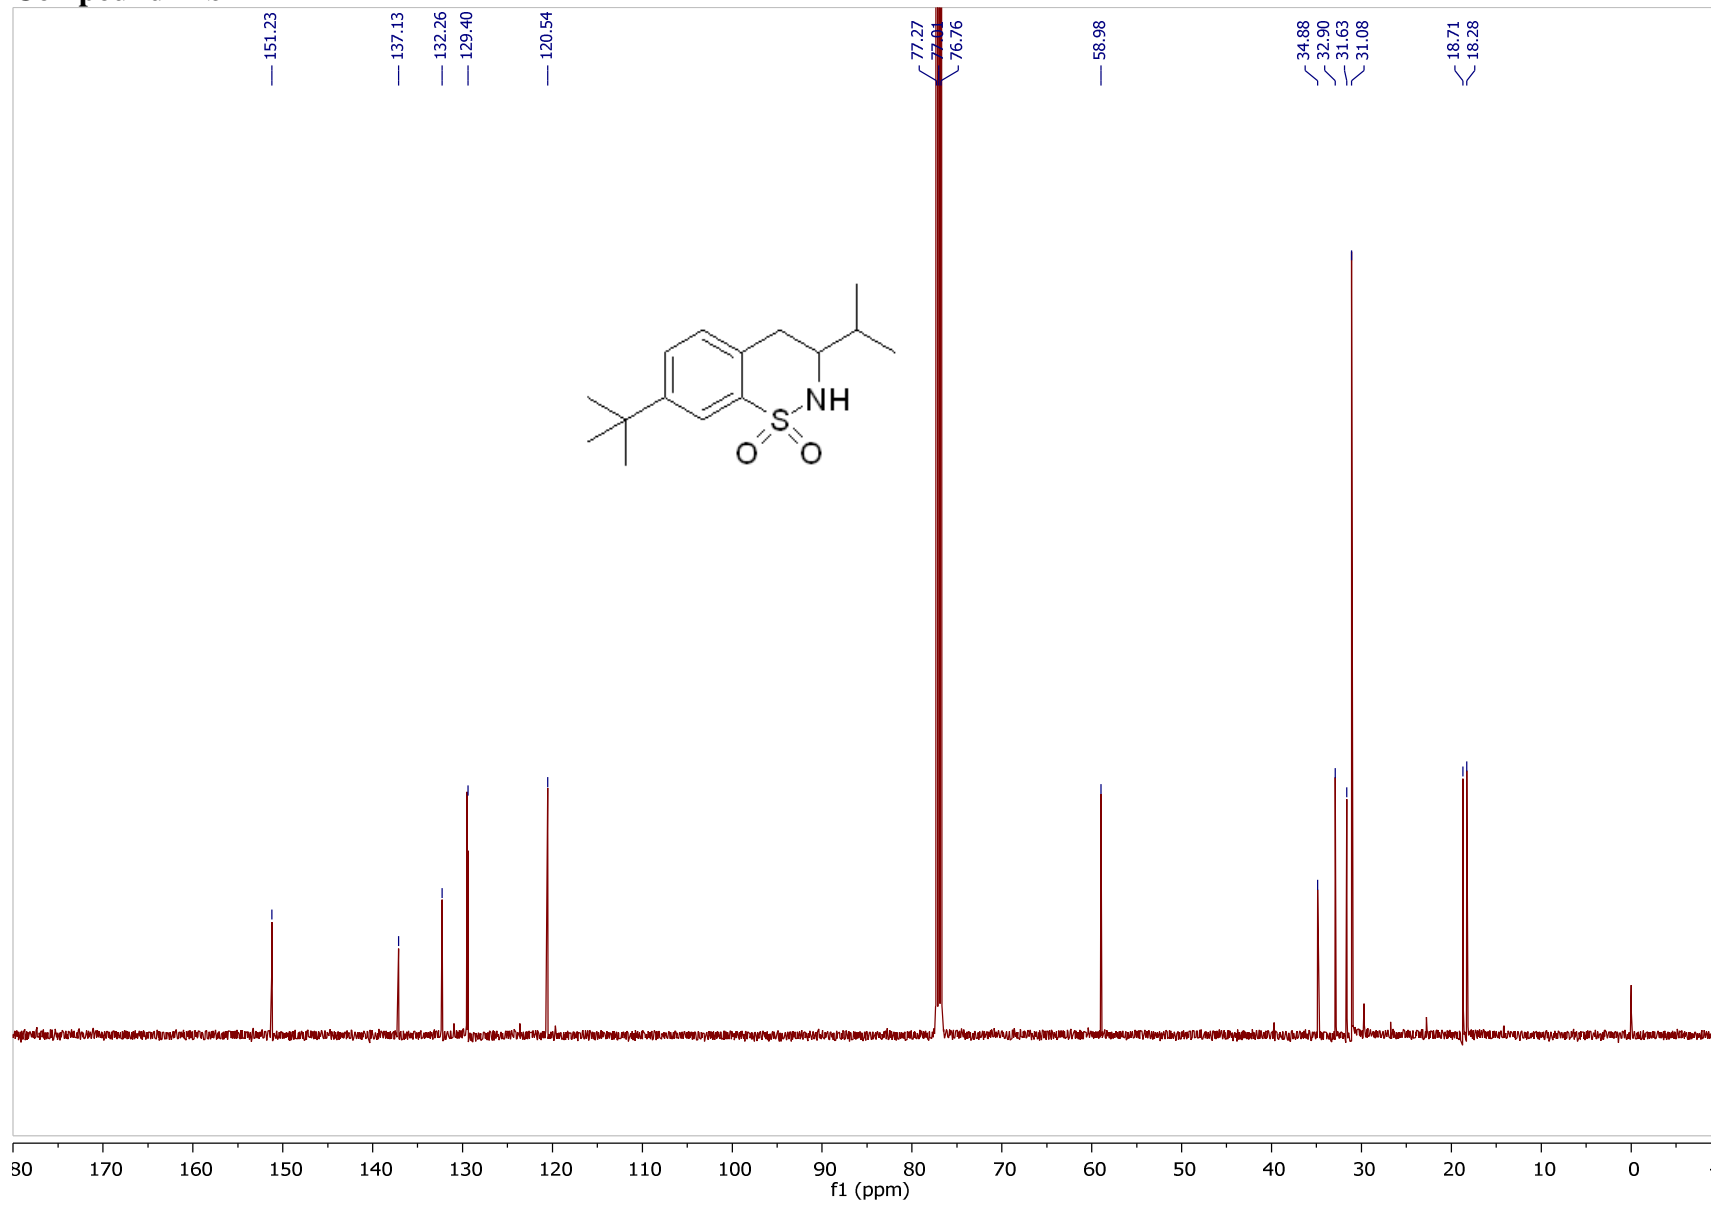

# Compound 13a

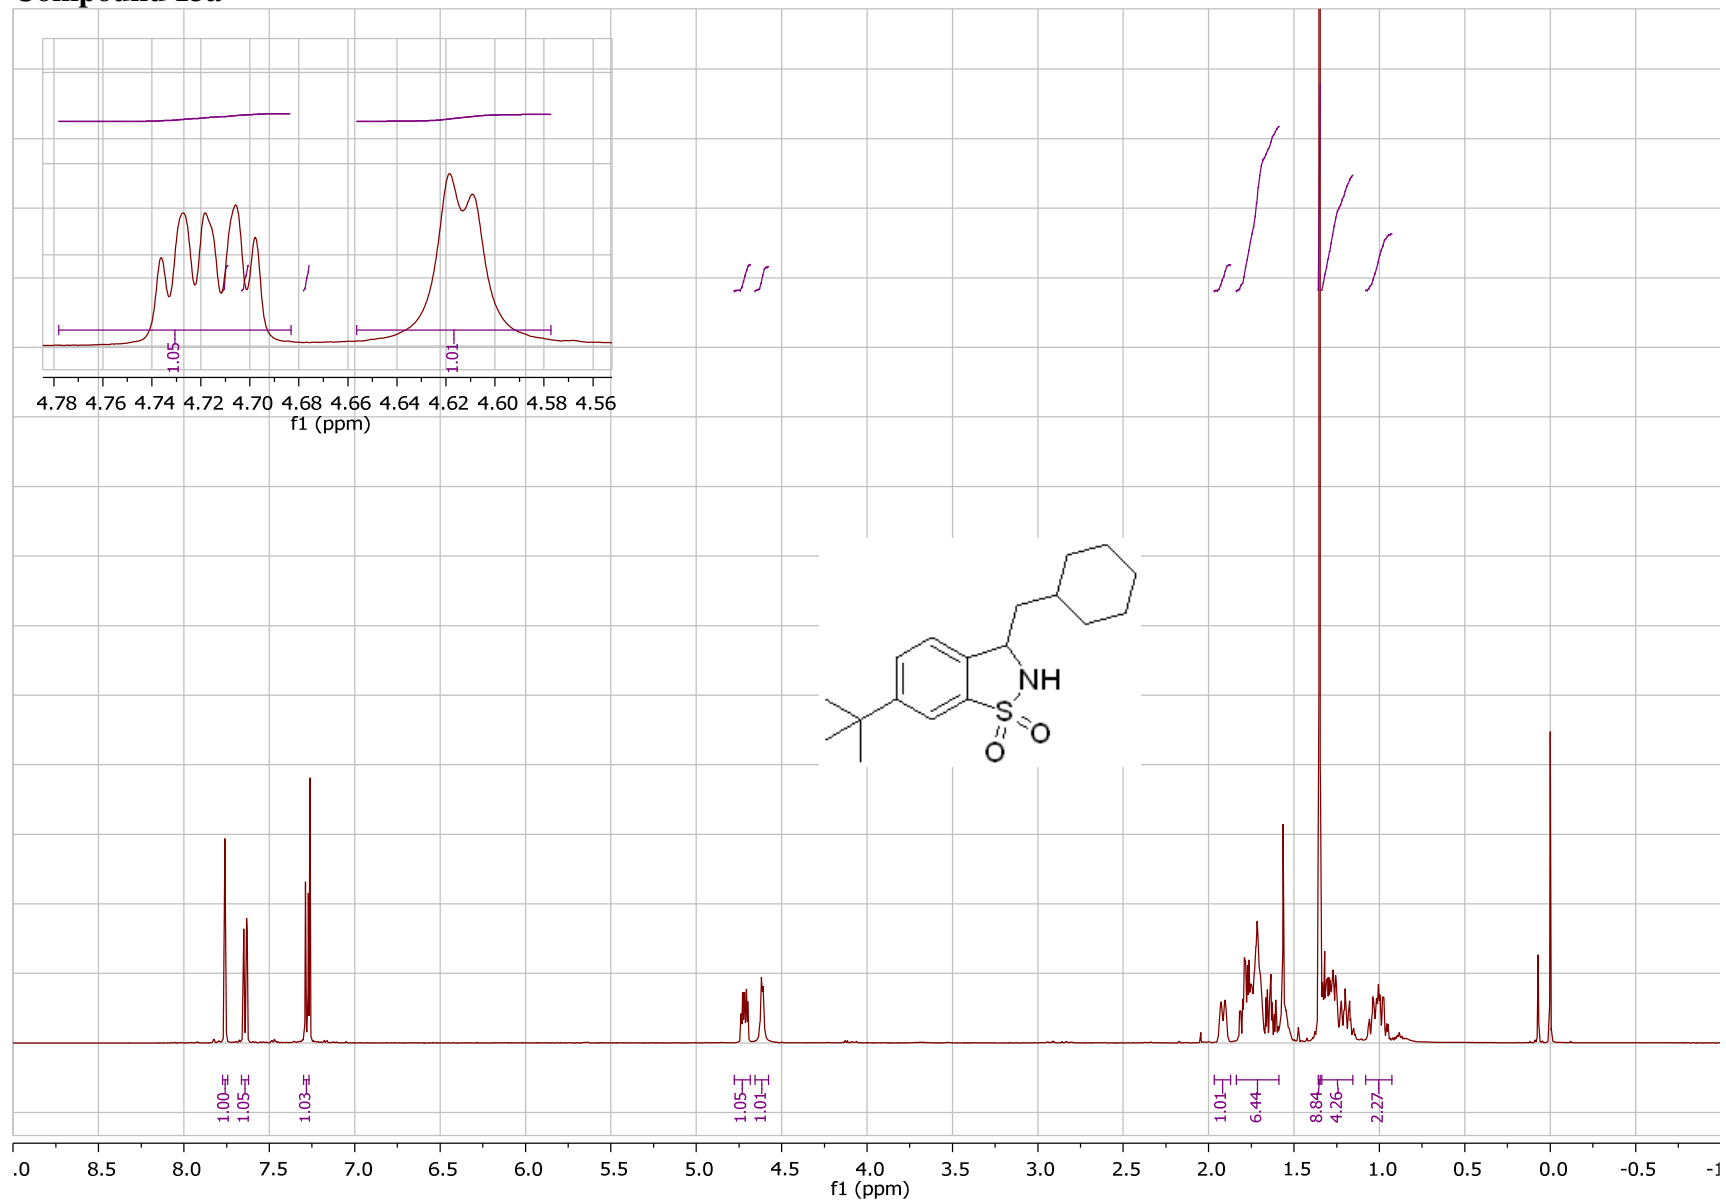

# Compound 13a

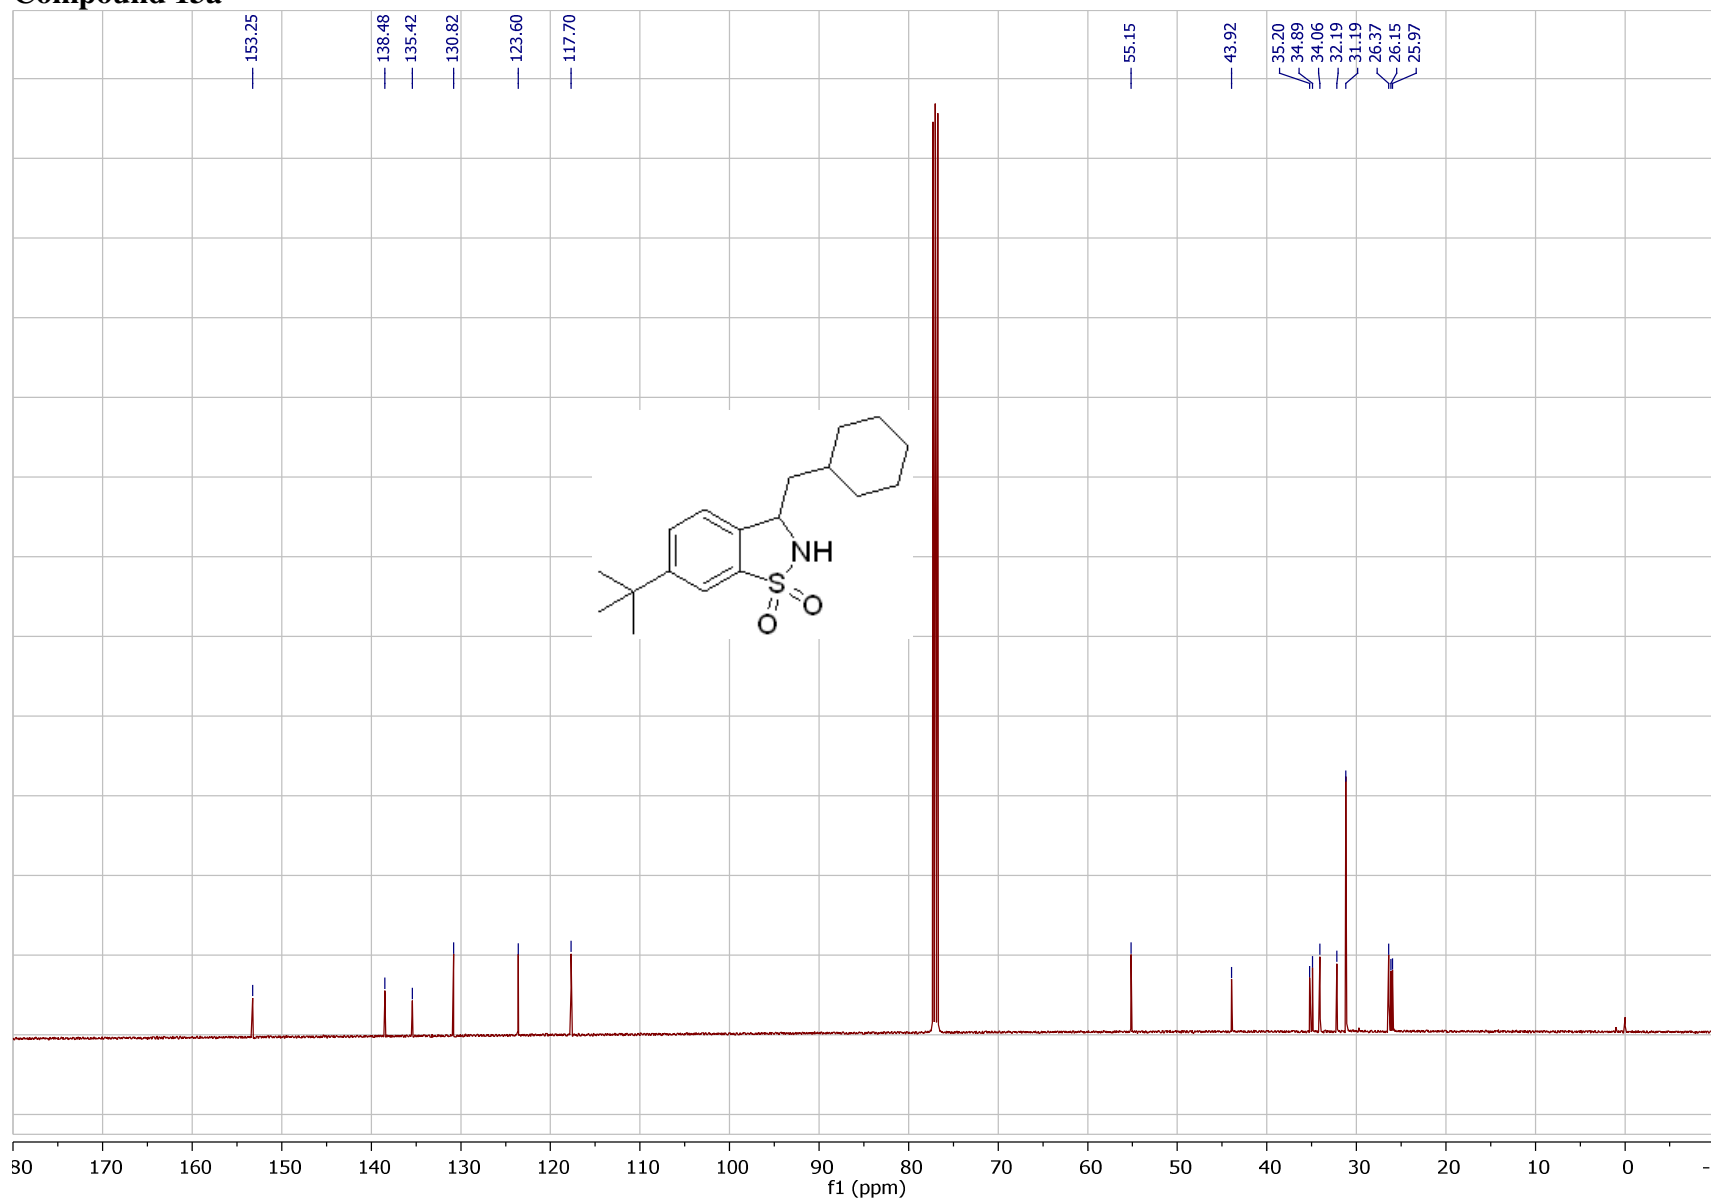

# Compound 13b

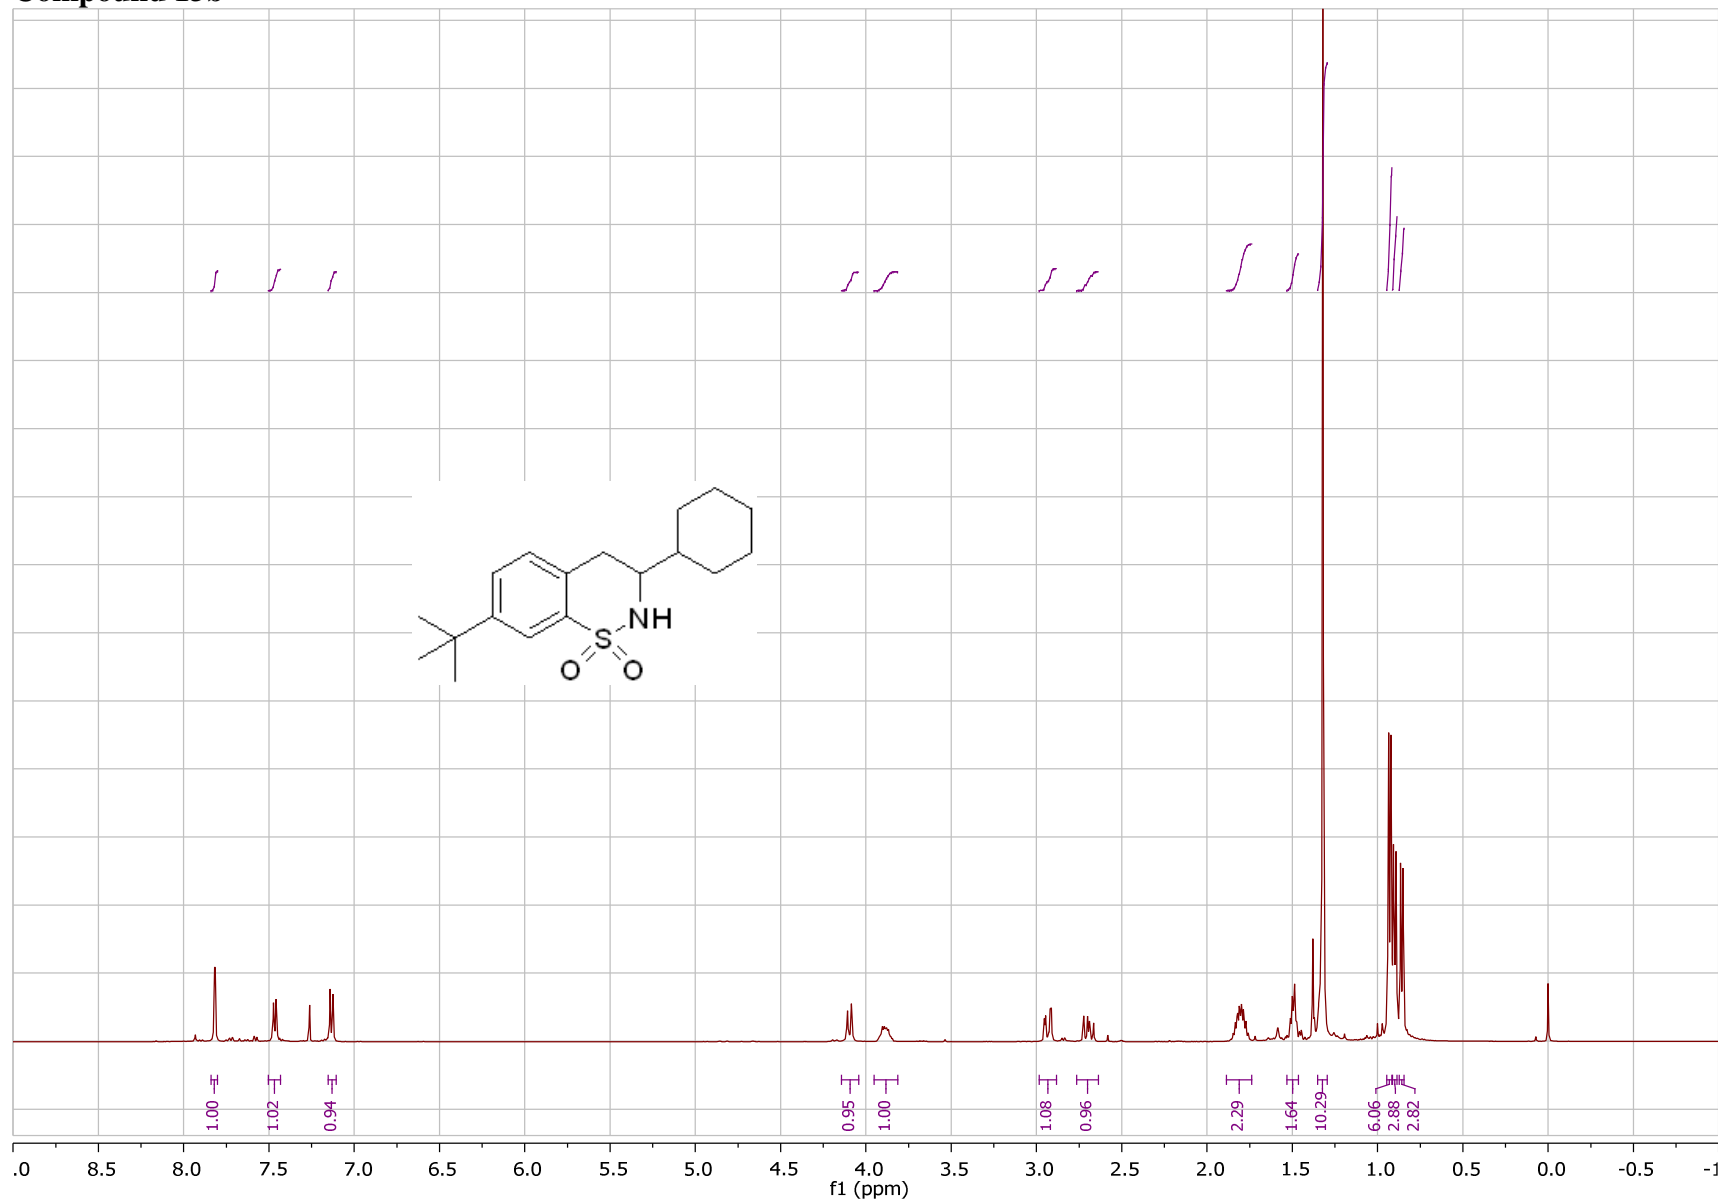

# Compound 13b

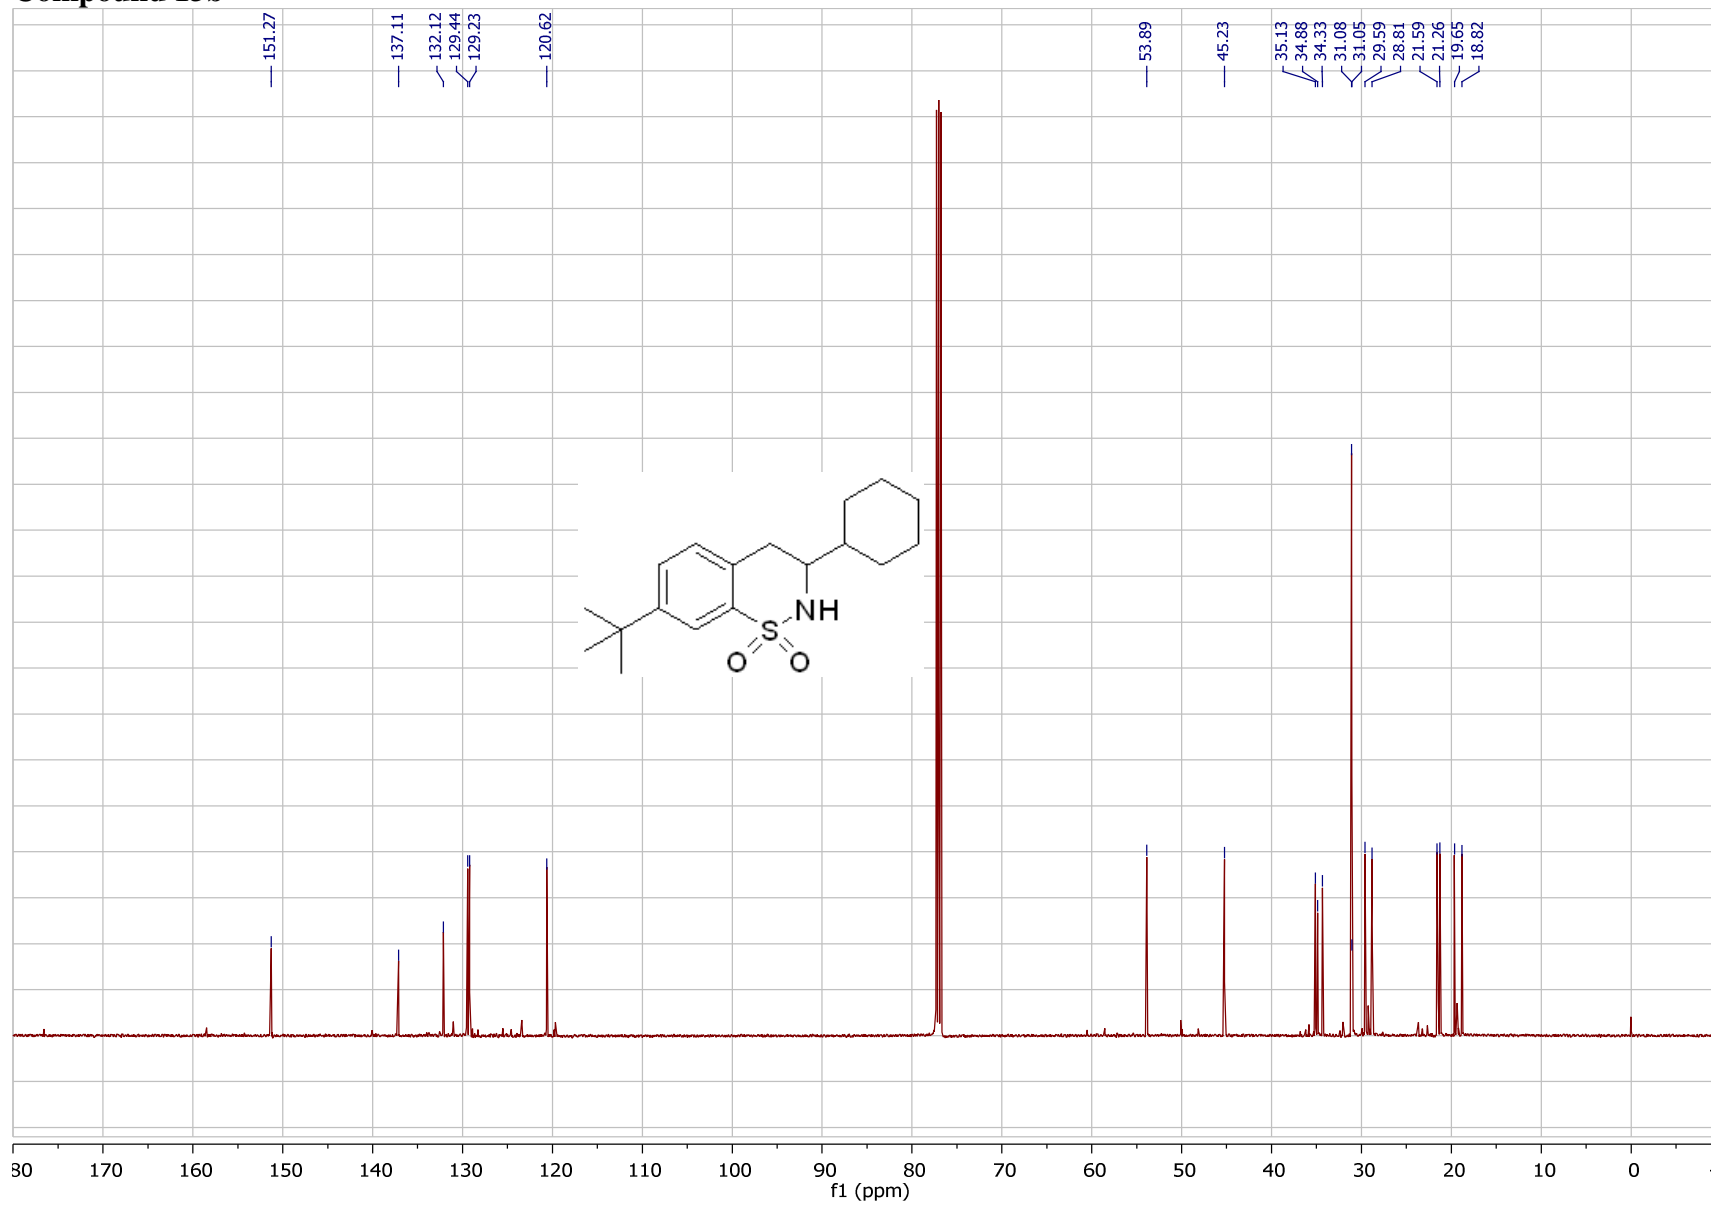

# Compound 14a

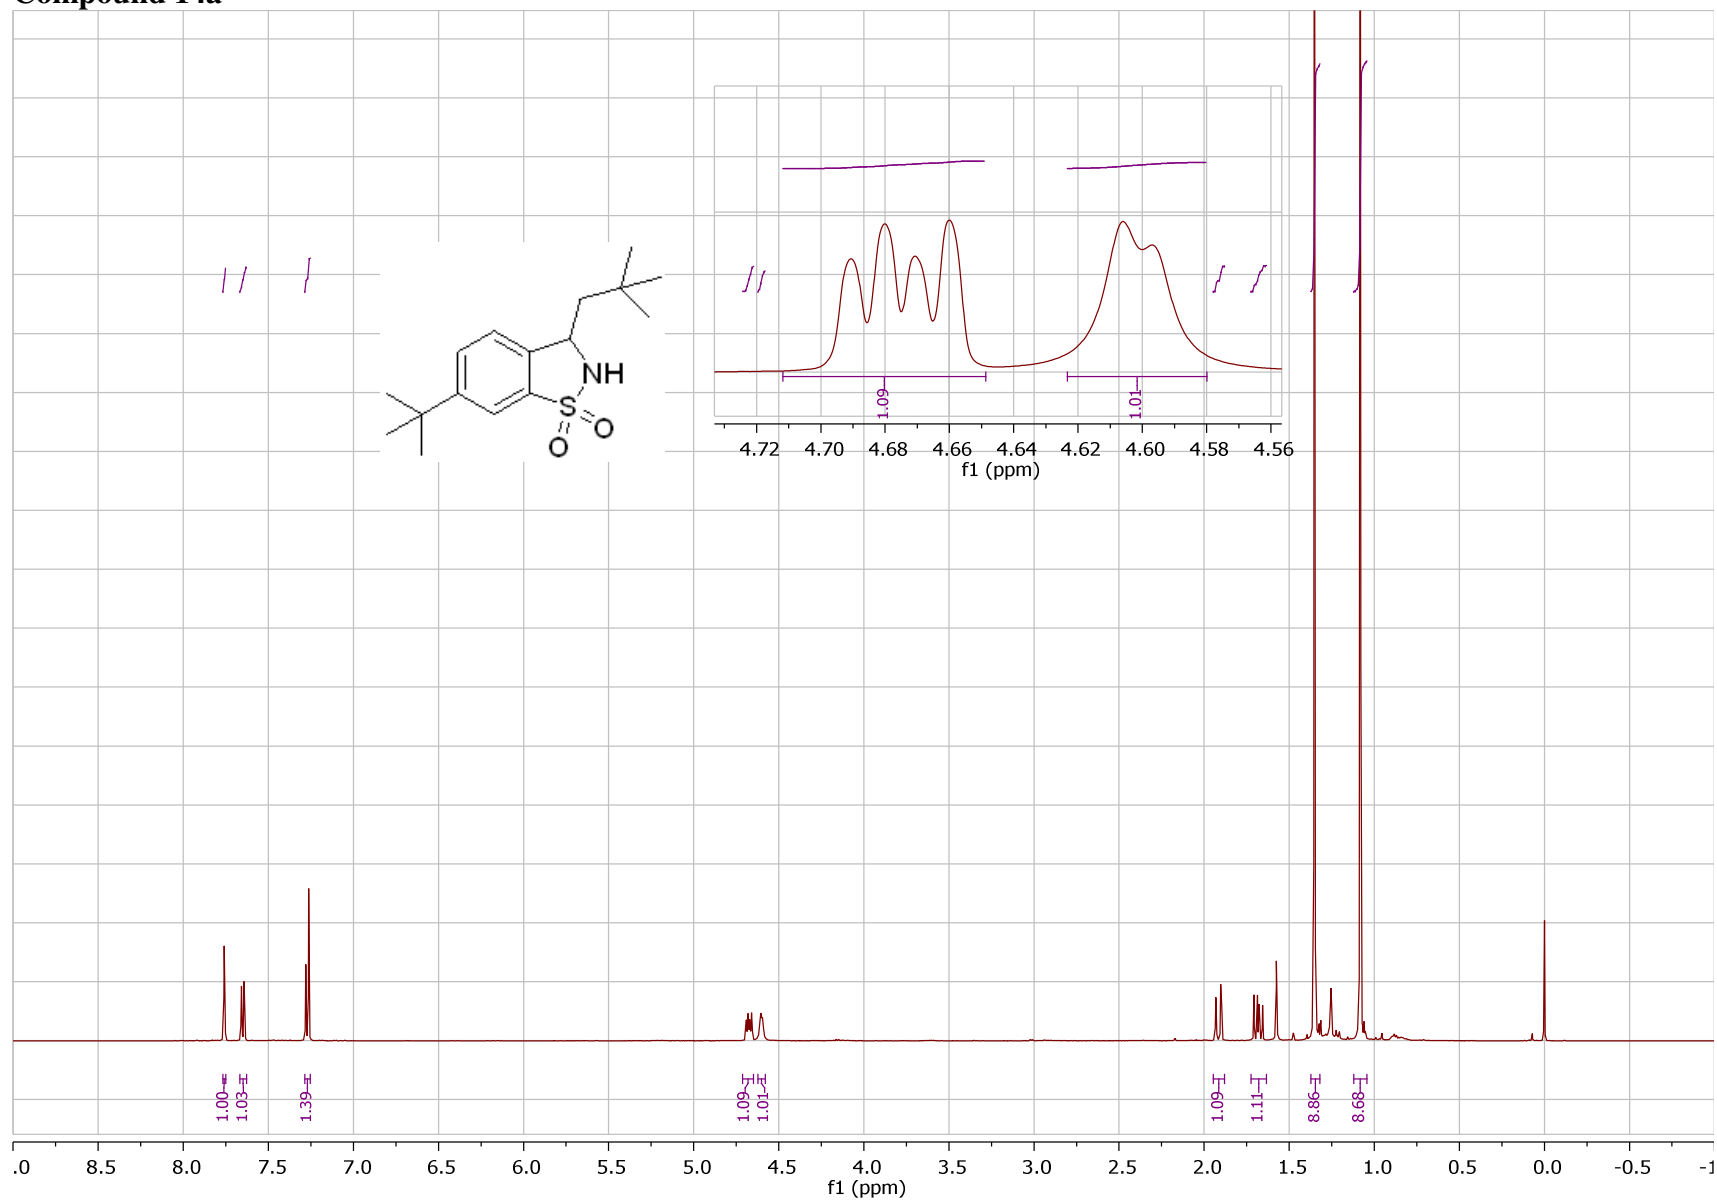

# Compound 14a

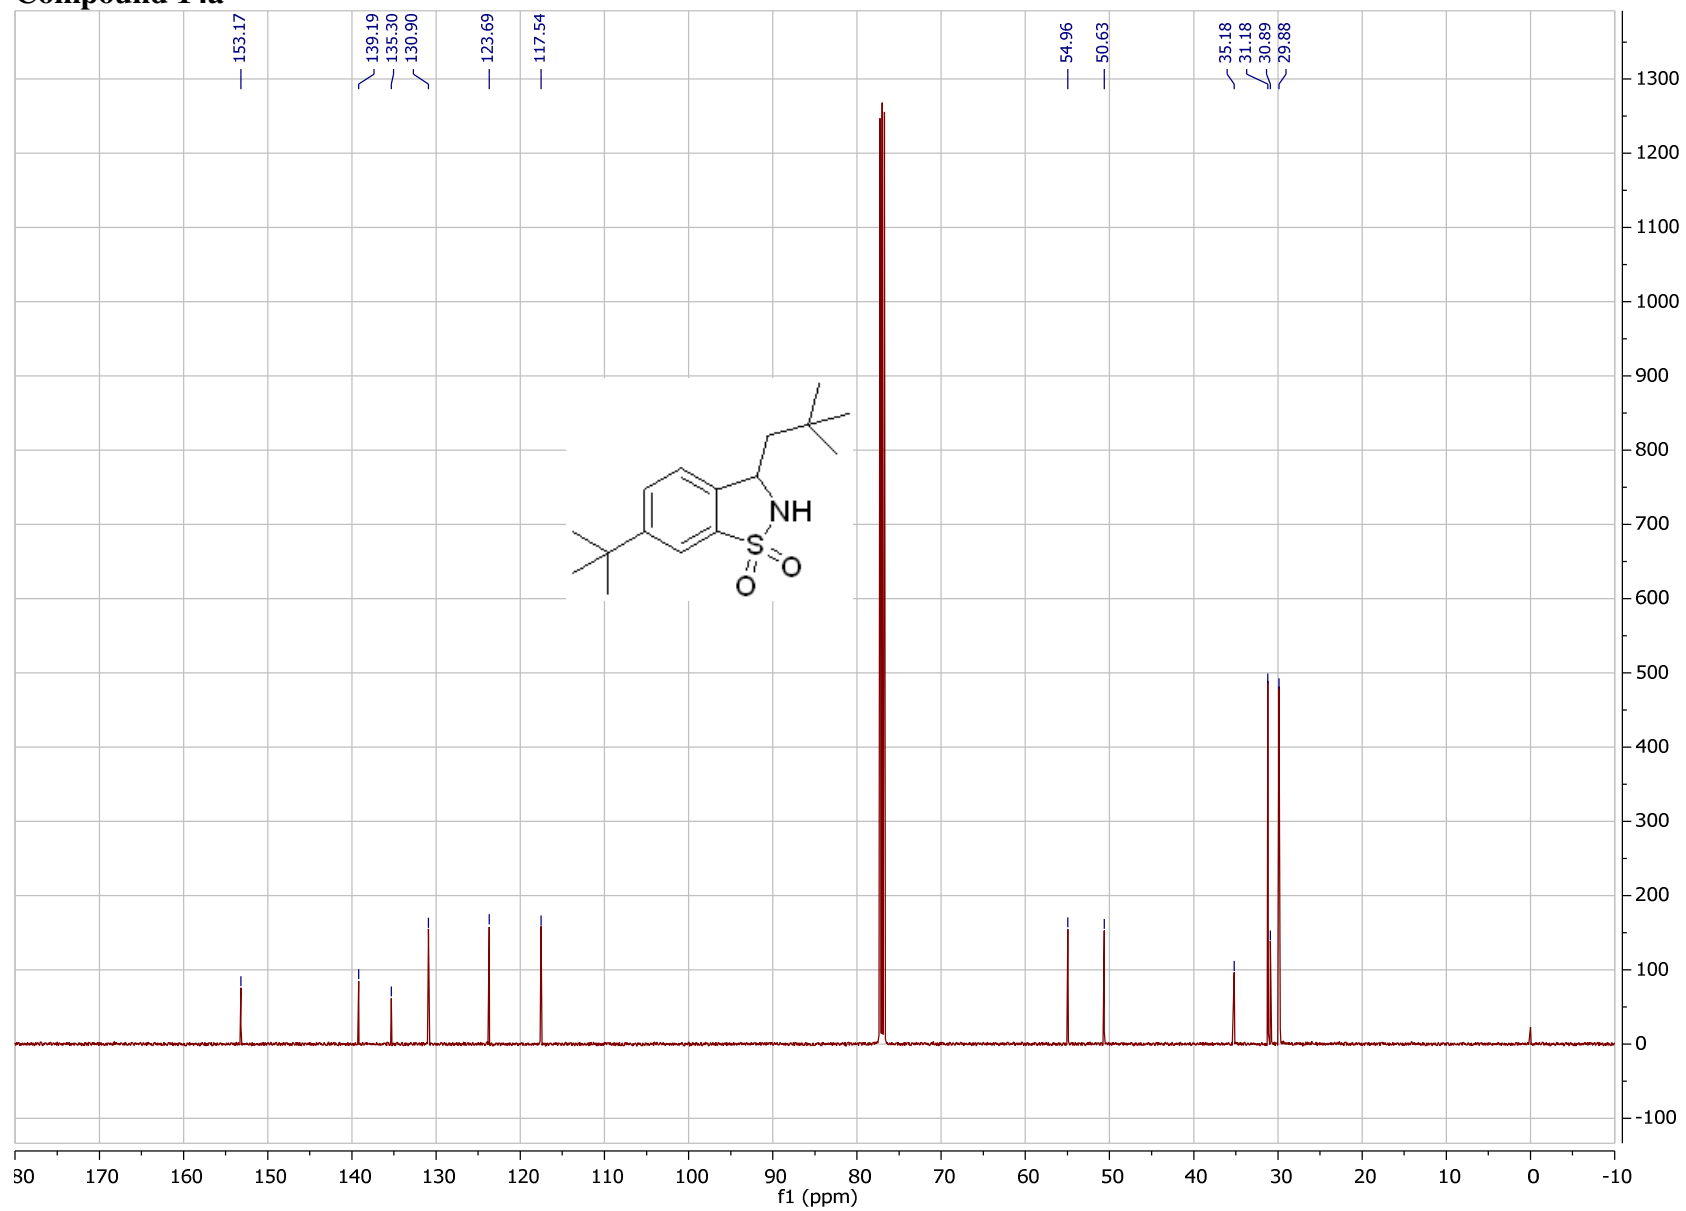

# Compound 14b

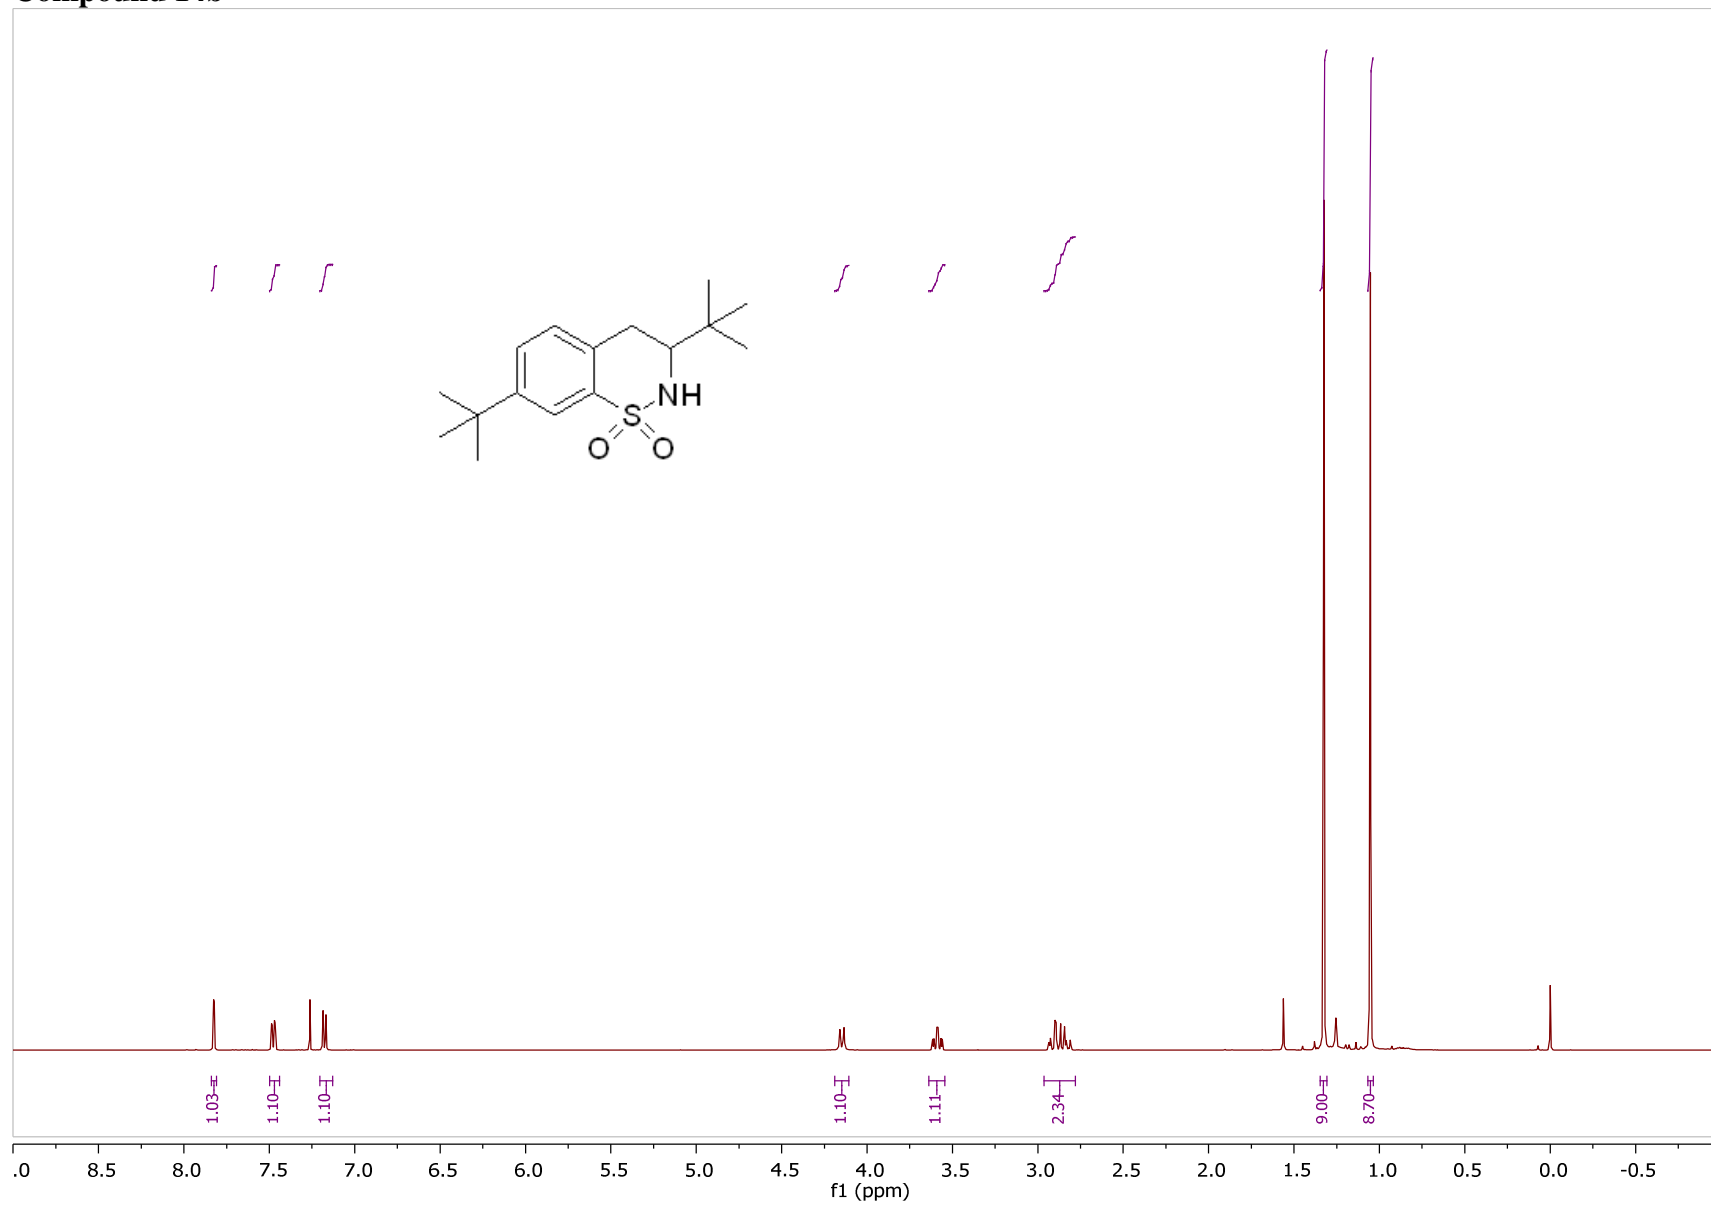

# Compound 14b

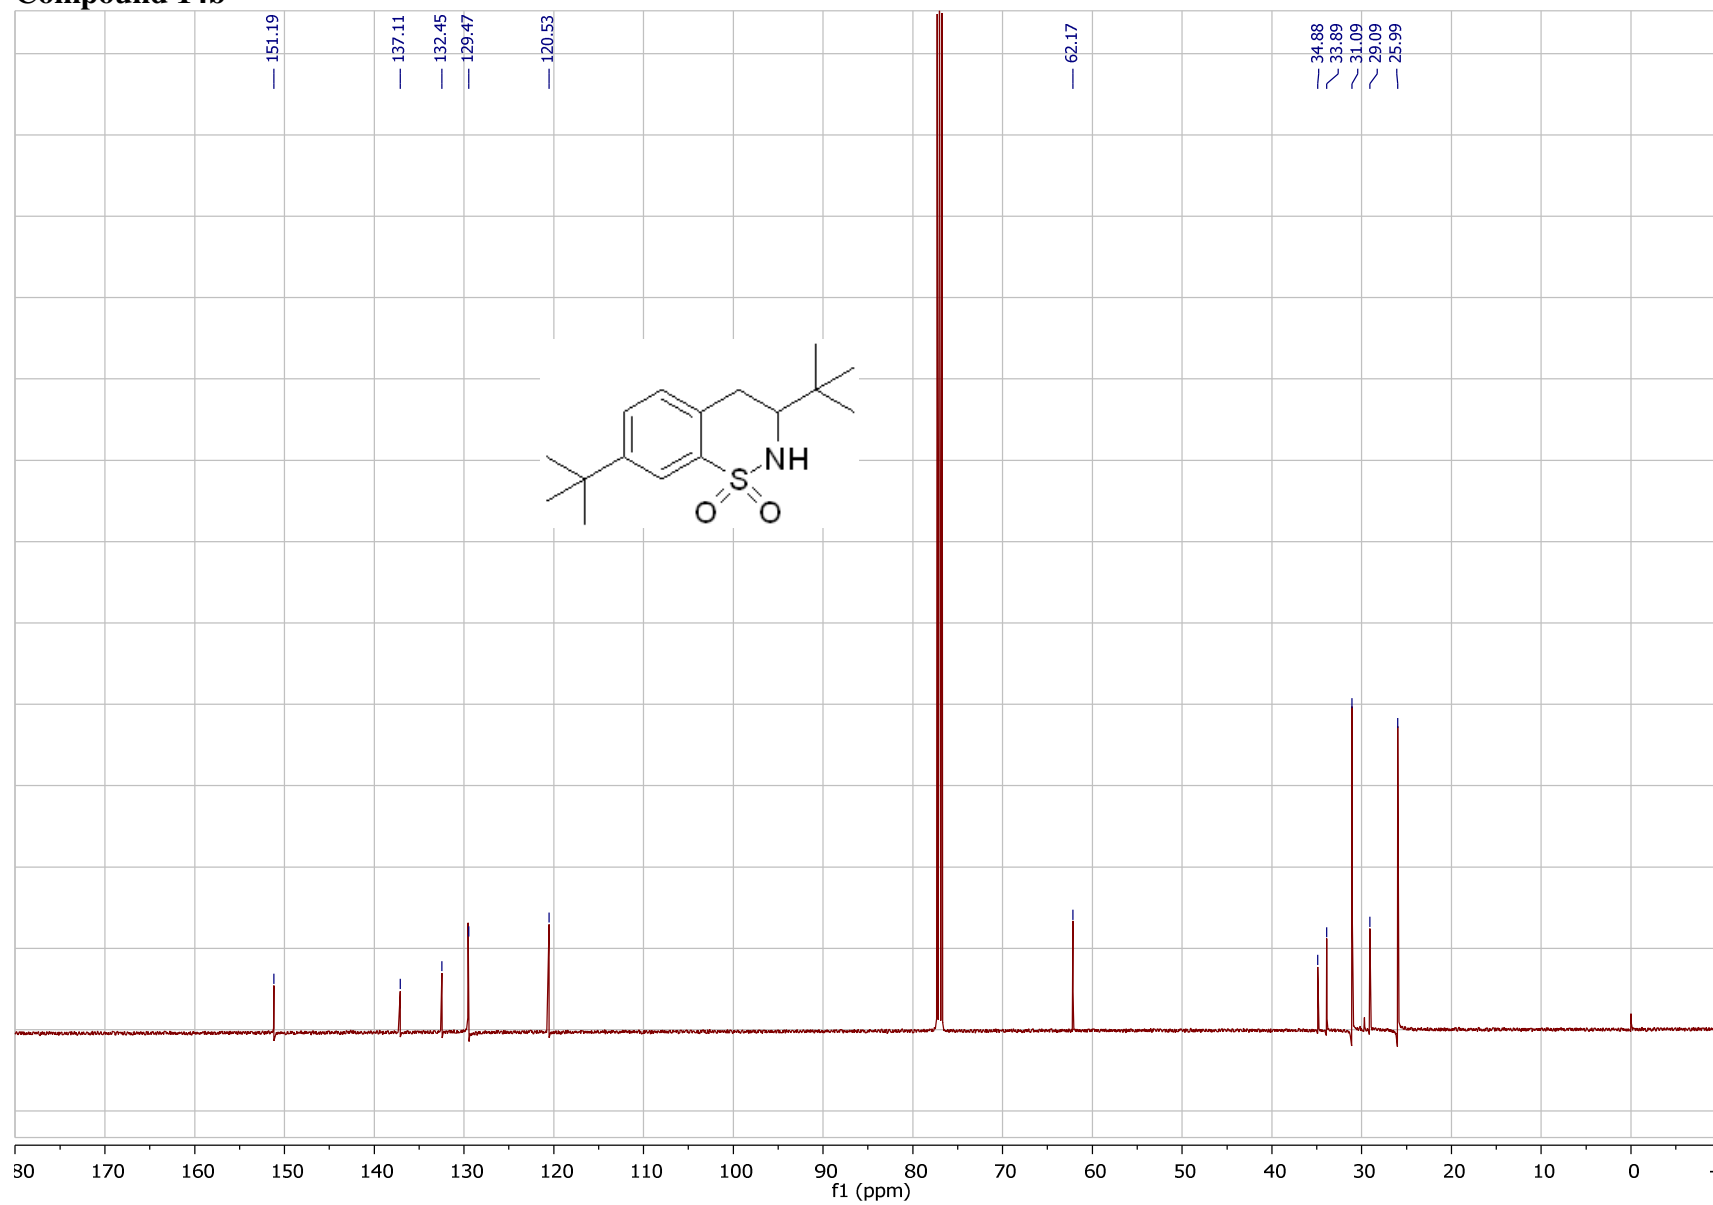

Compound 15a

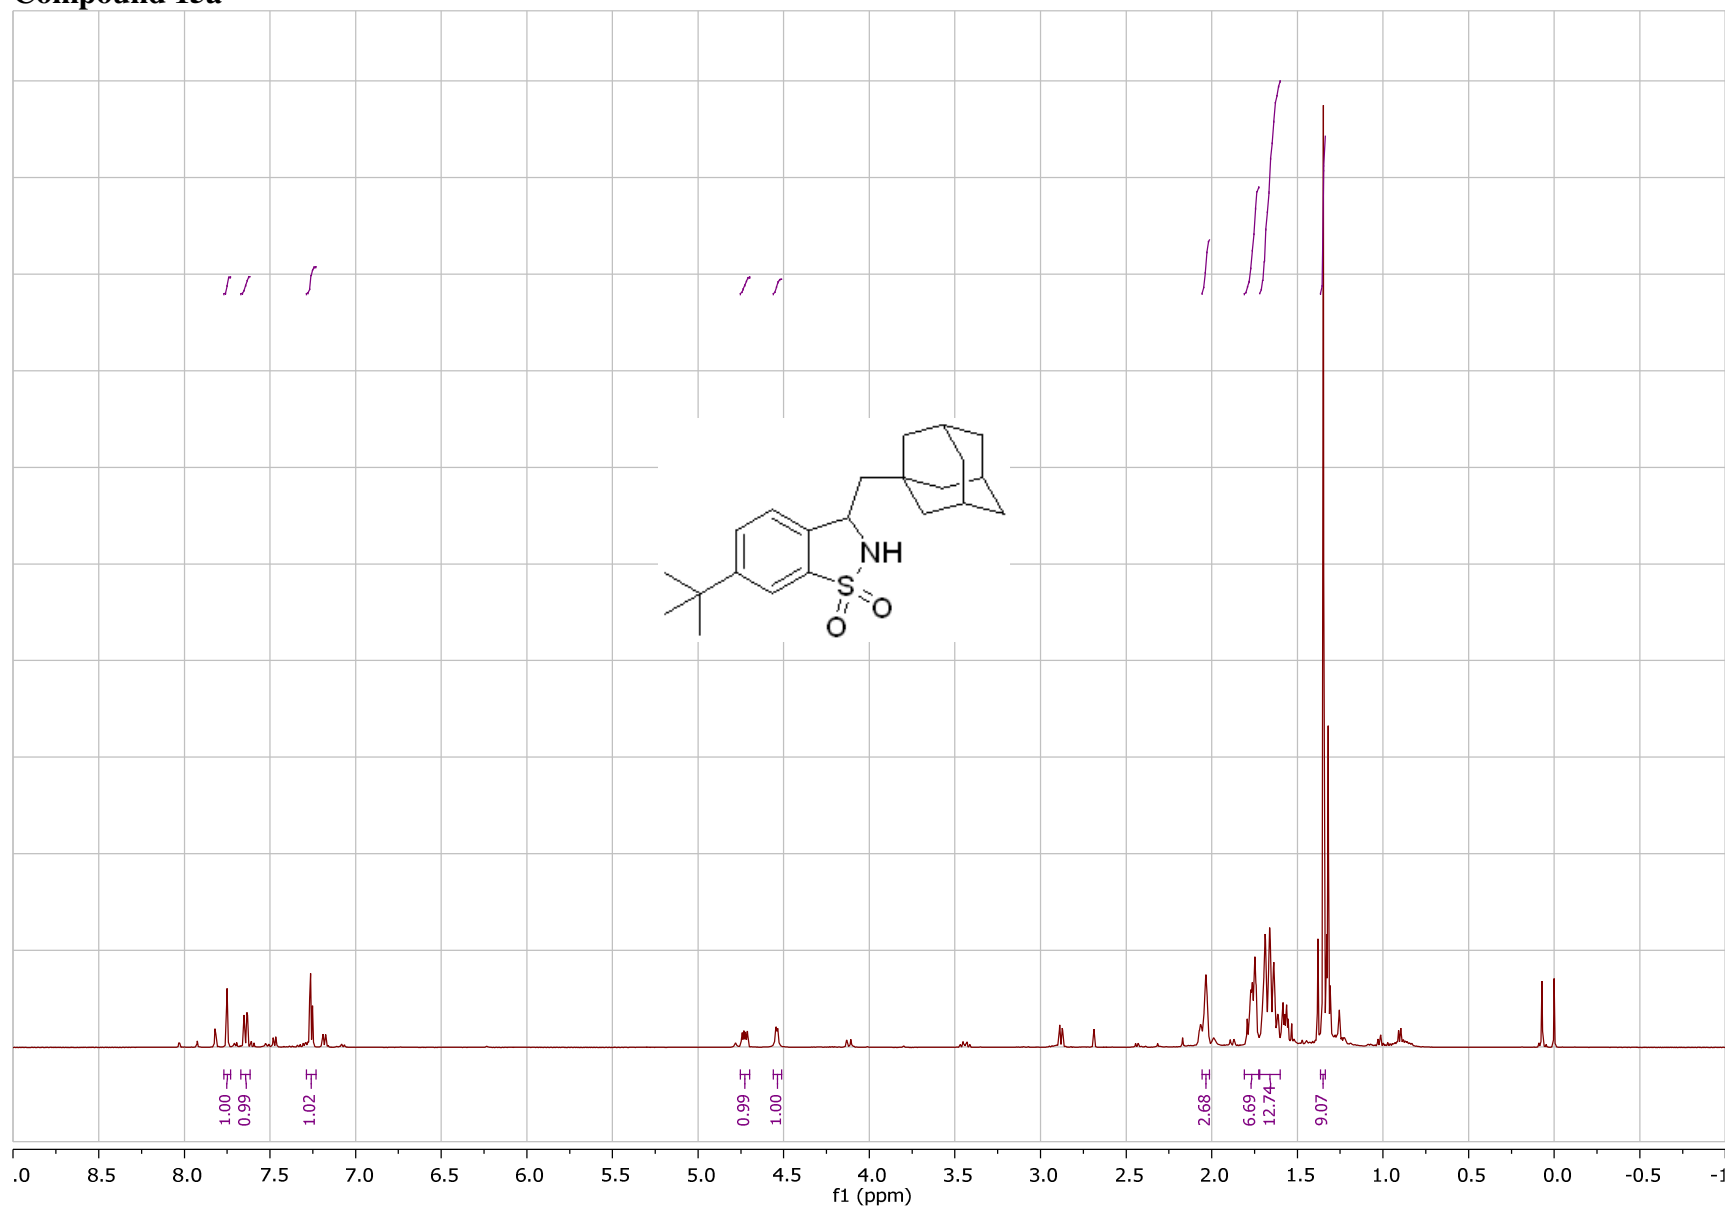

### Compound 15a

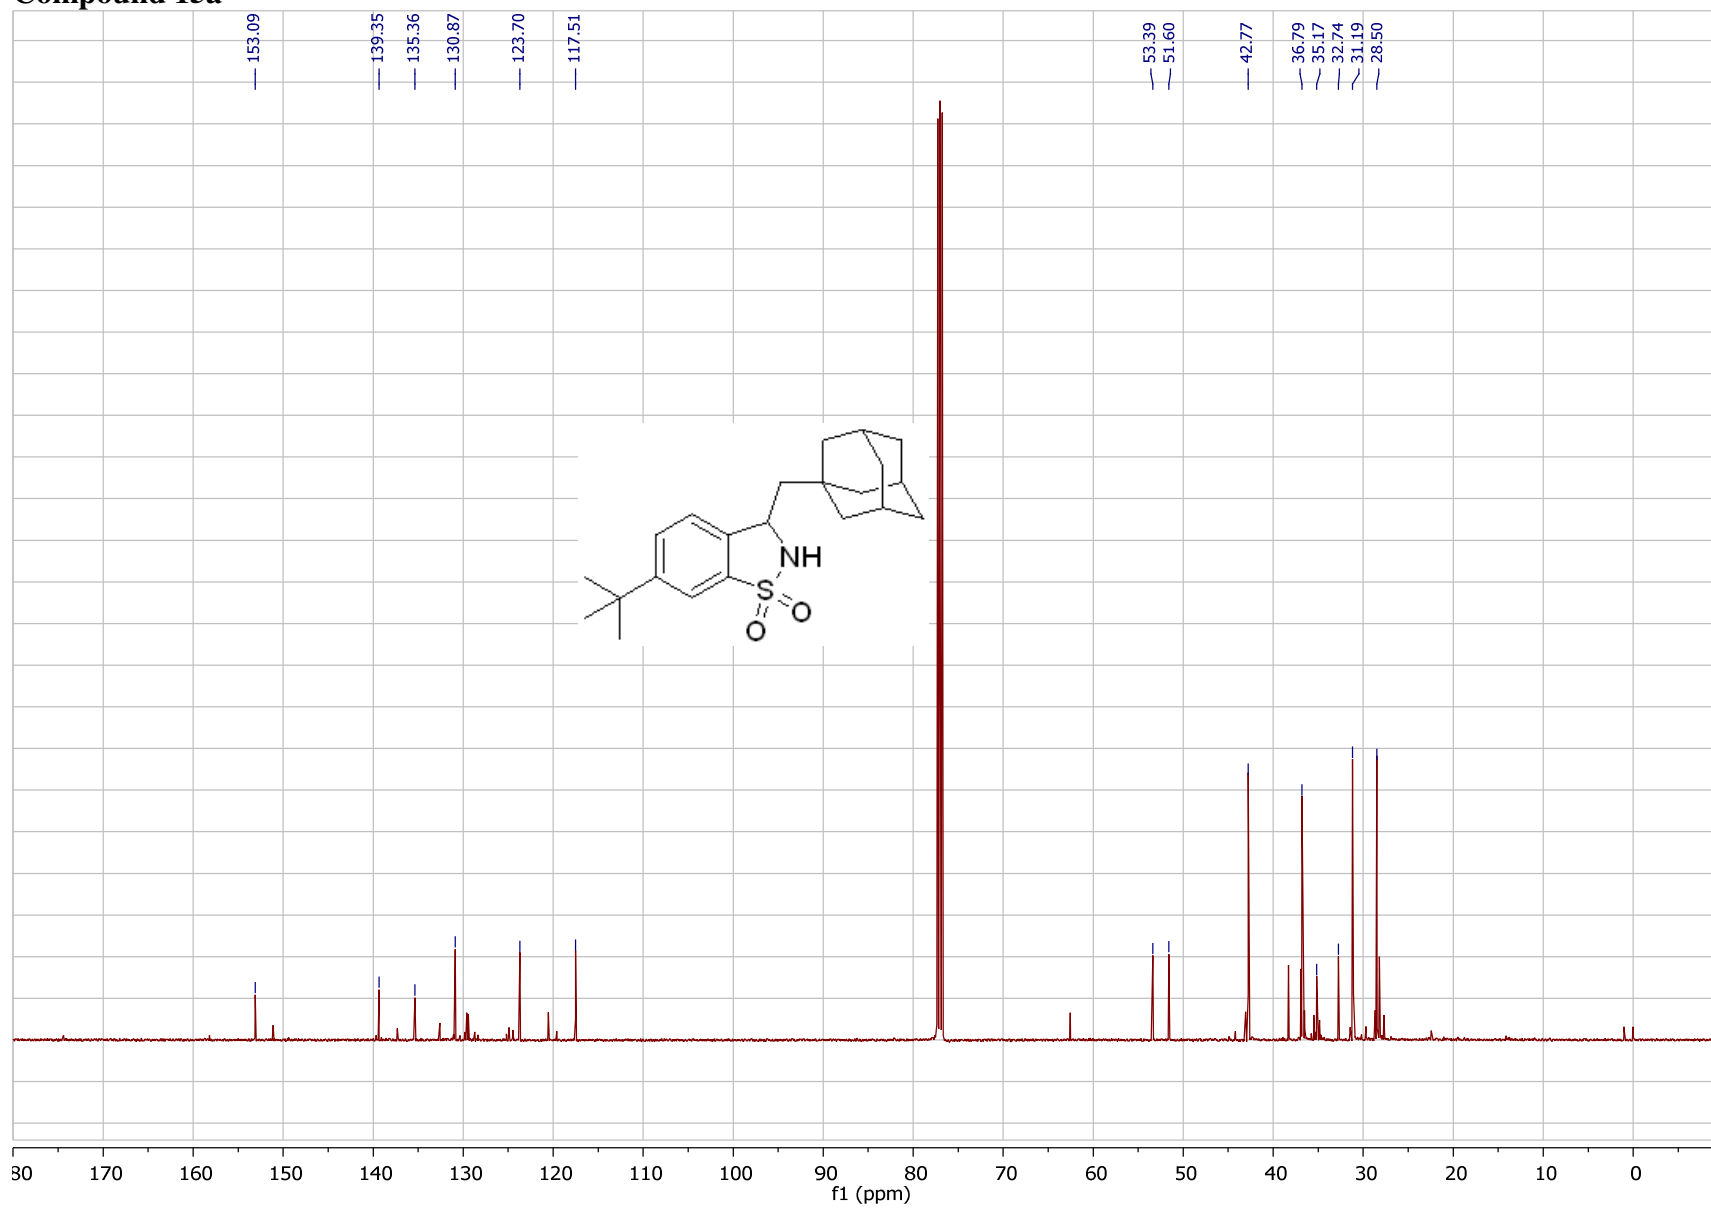

S2-99

Compound 15b

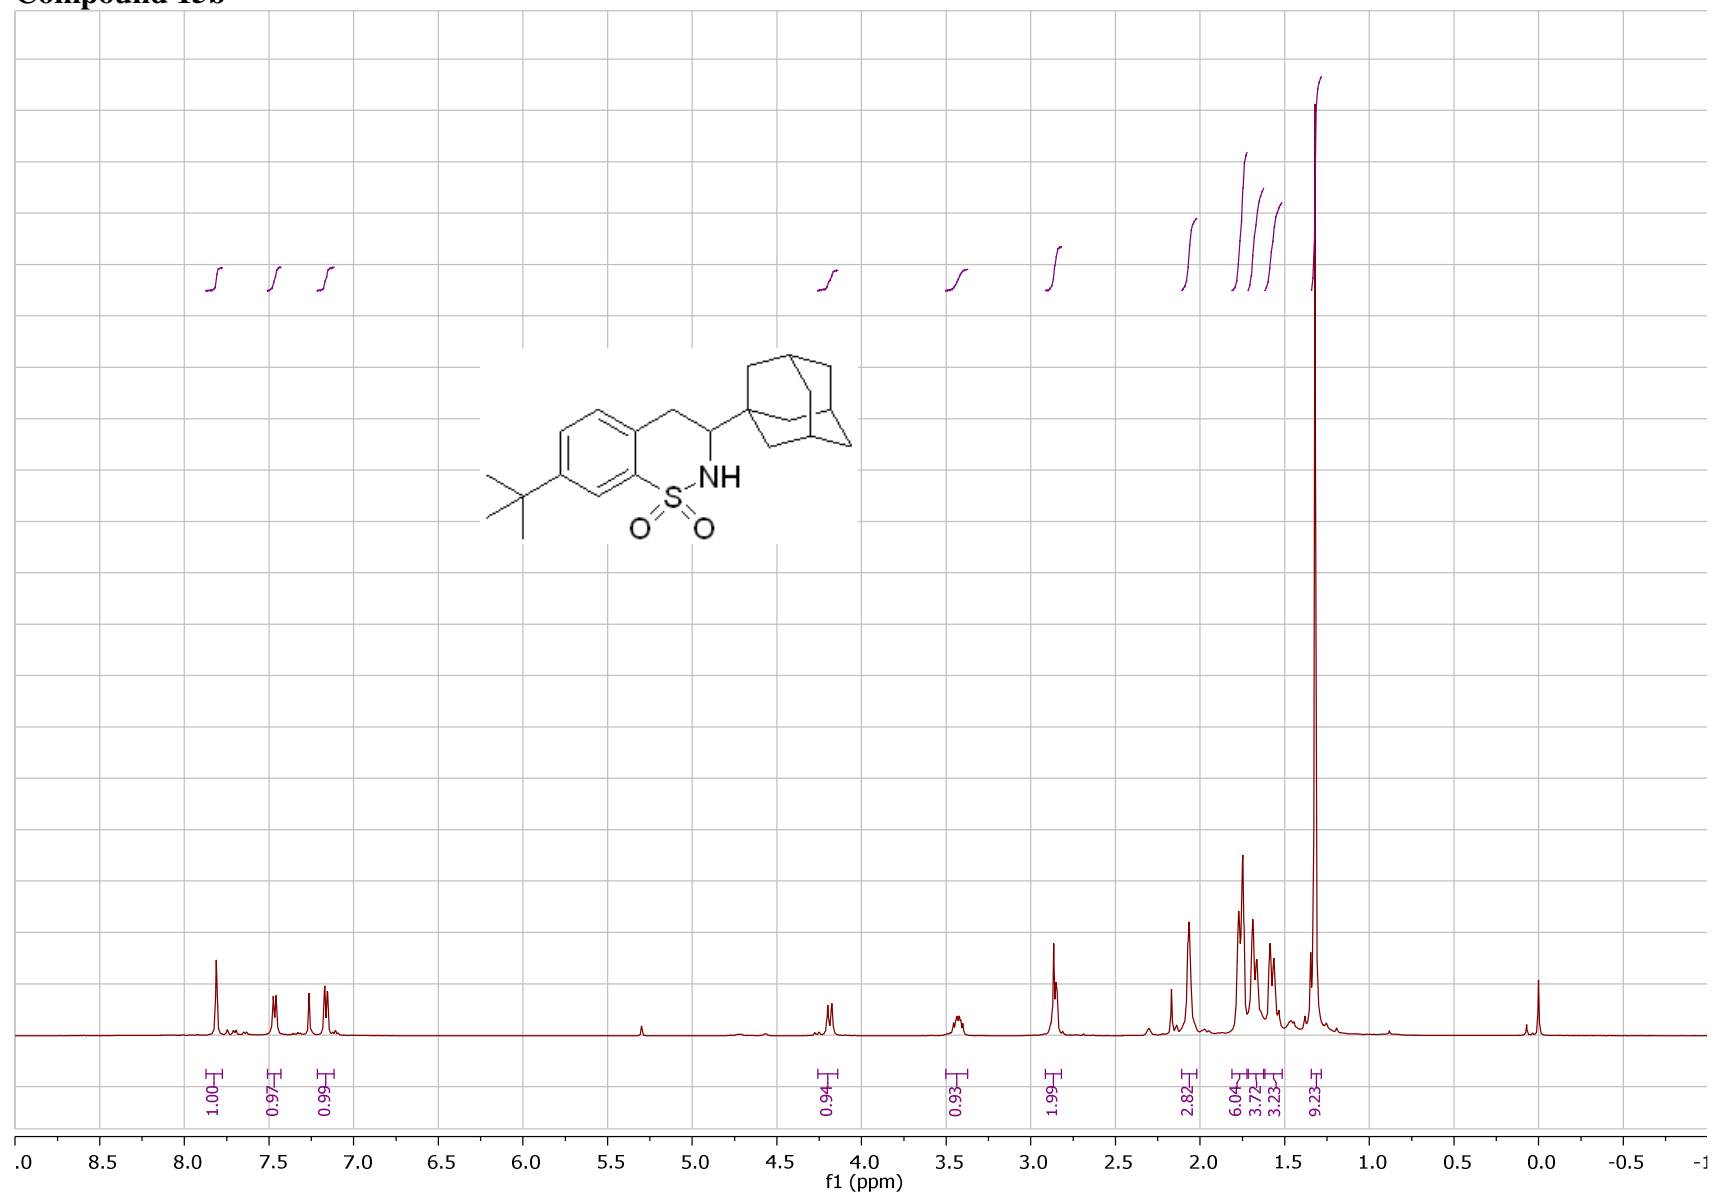

# Compound 15b

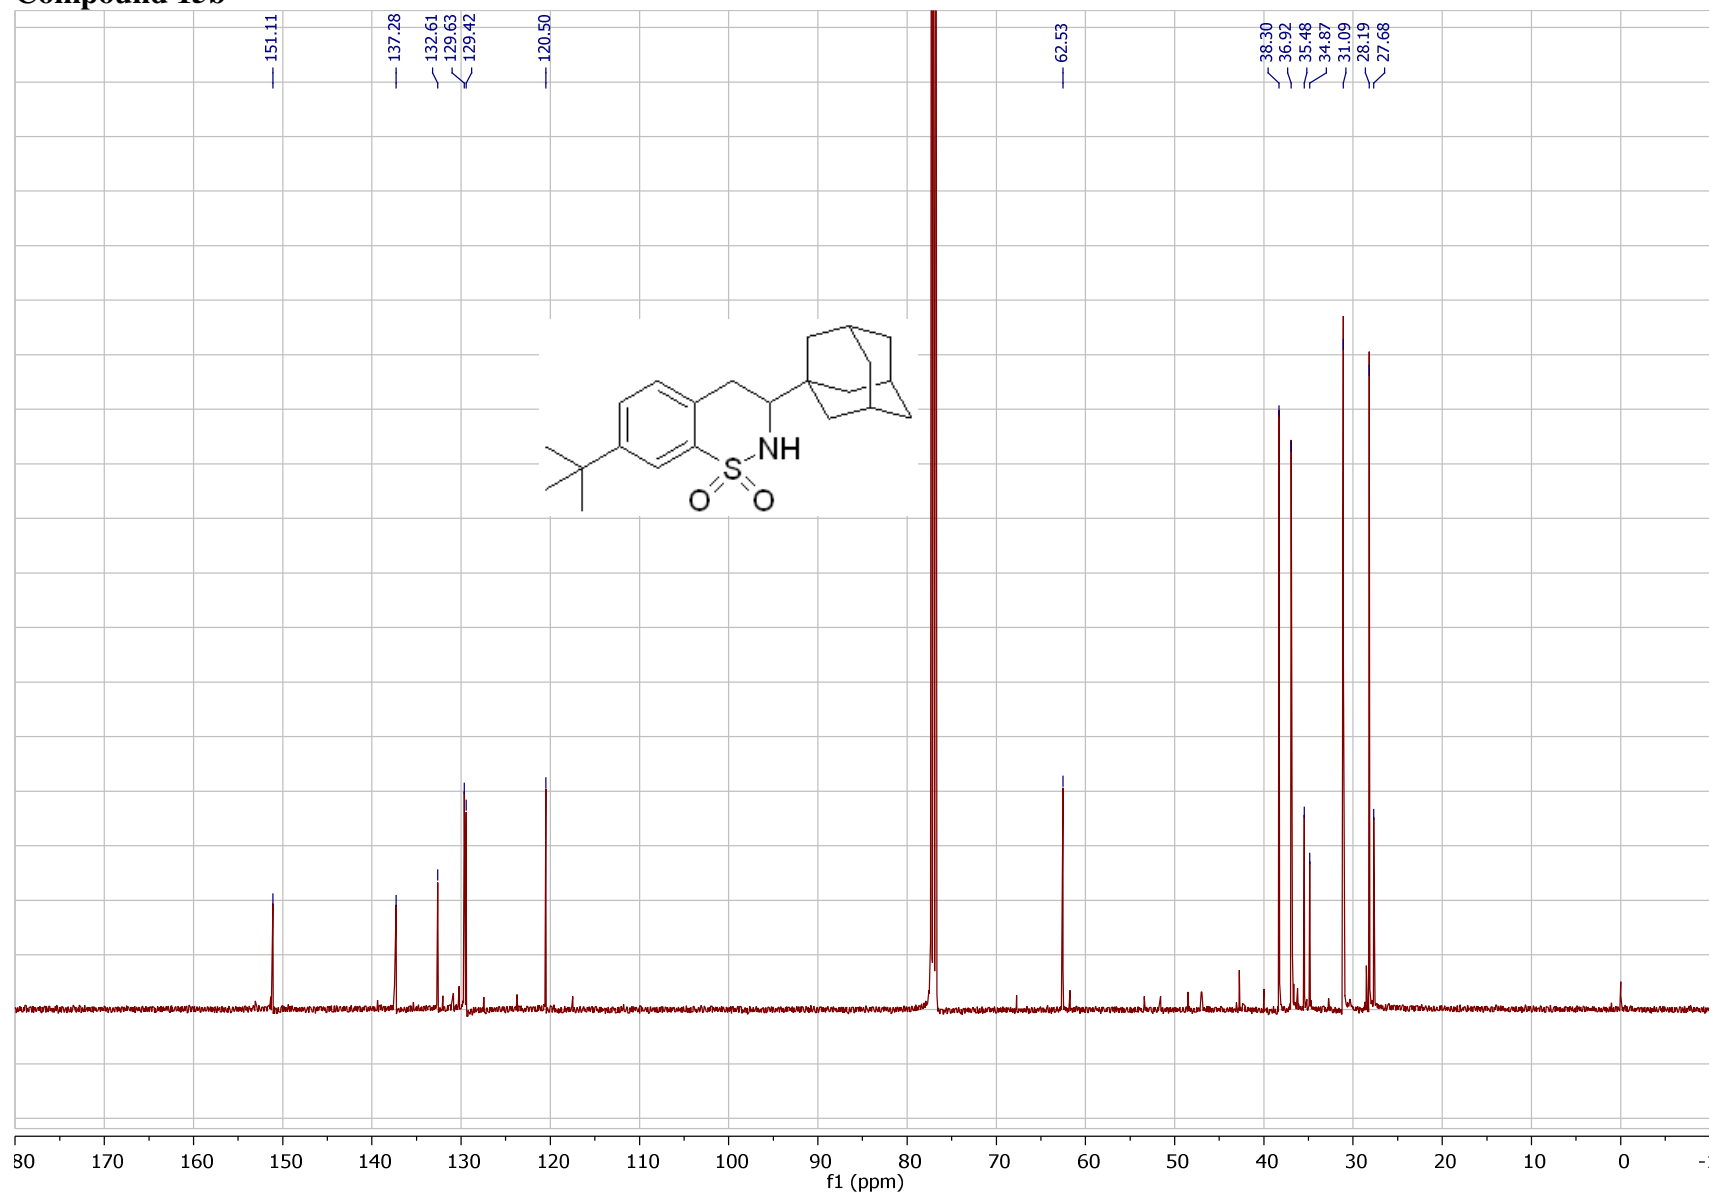

# Compound 16a

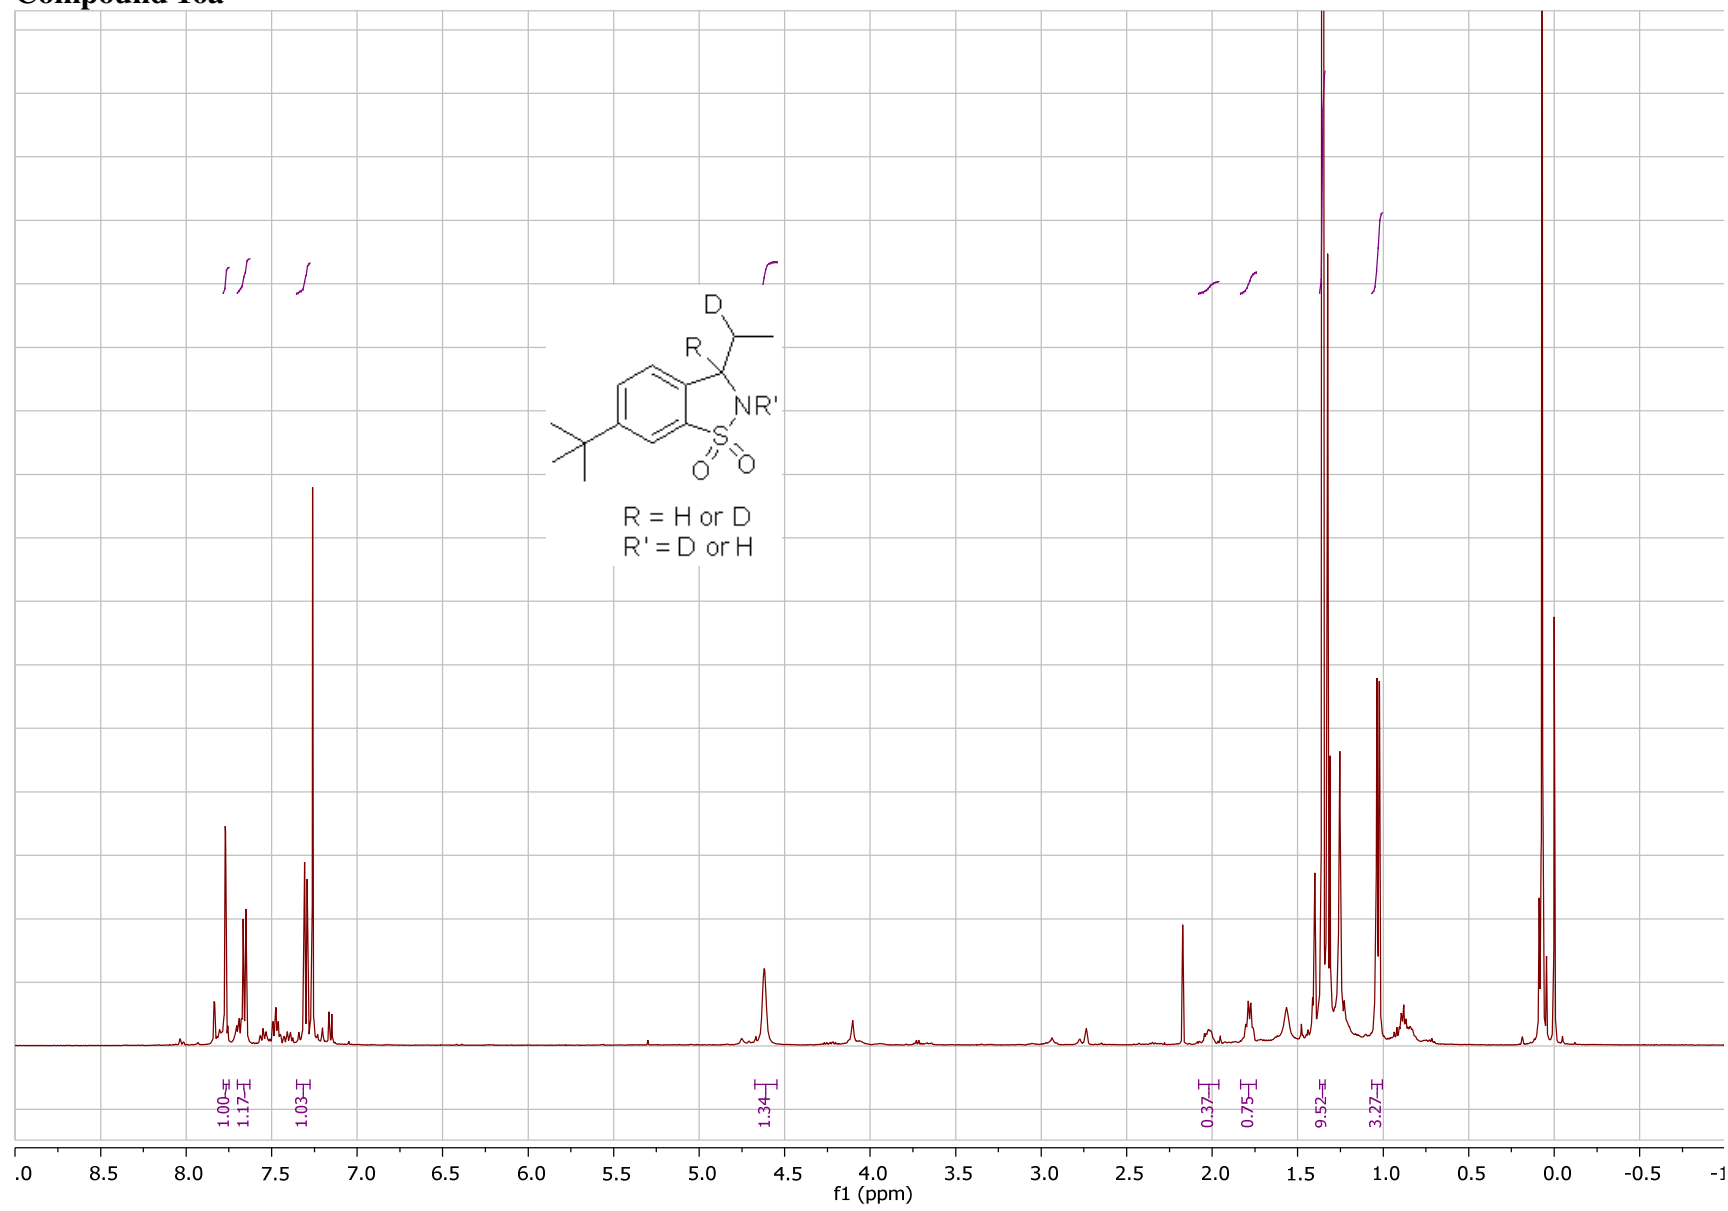

# Compound 16a

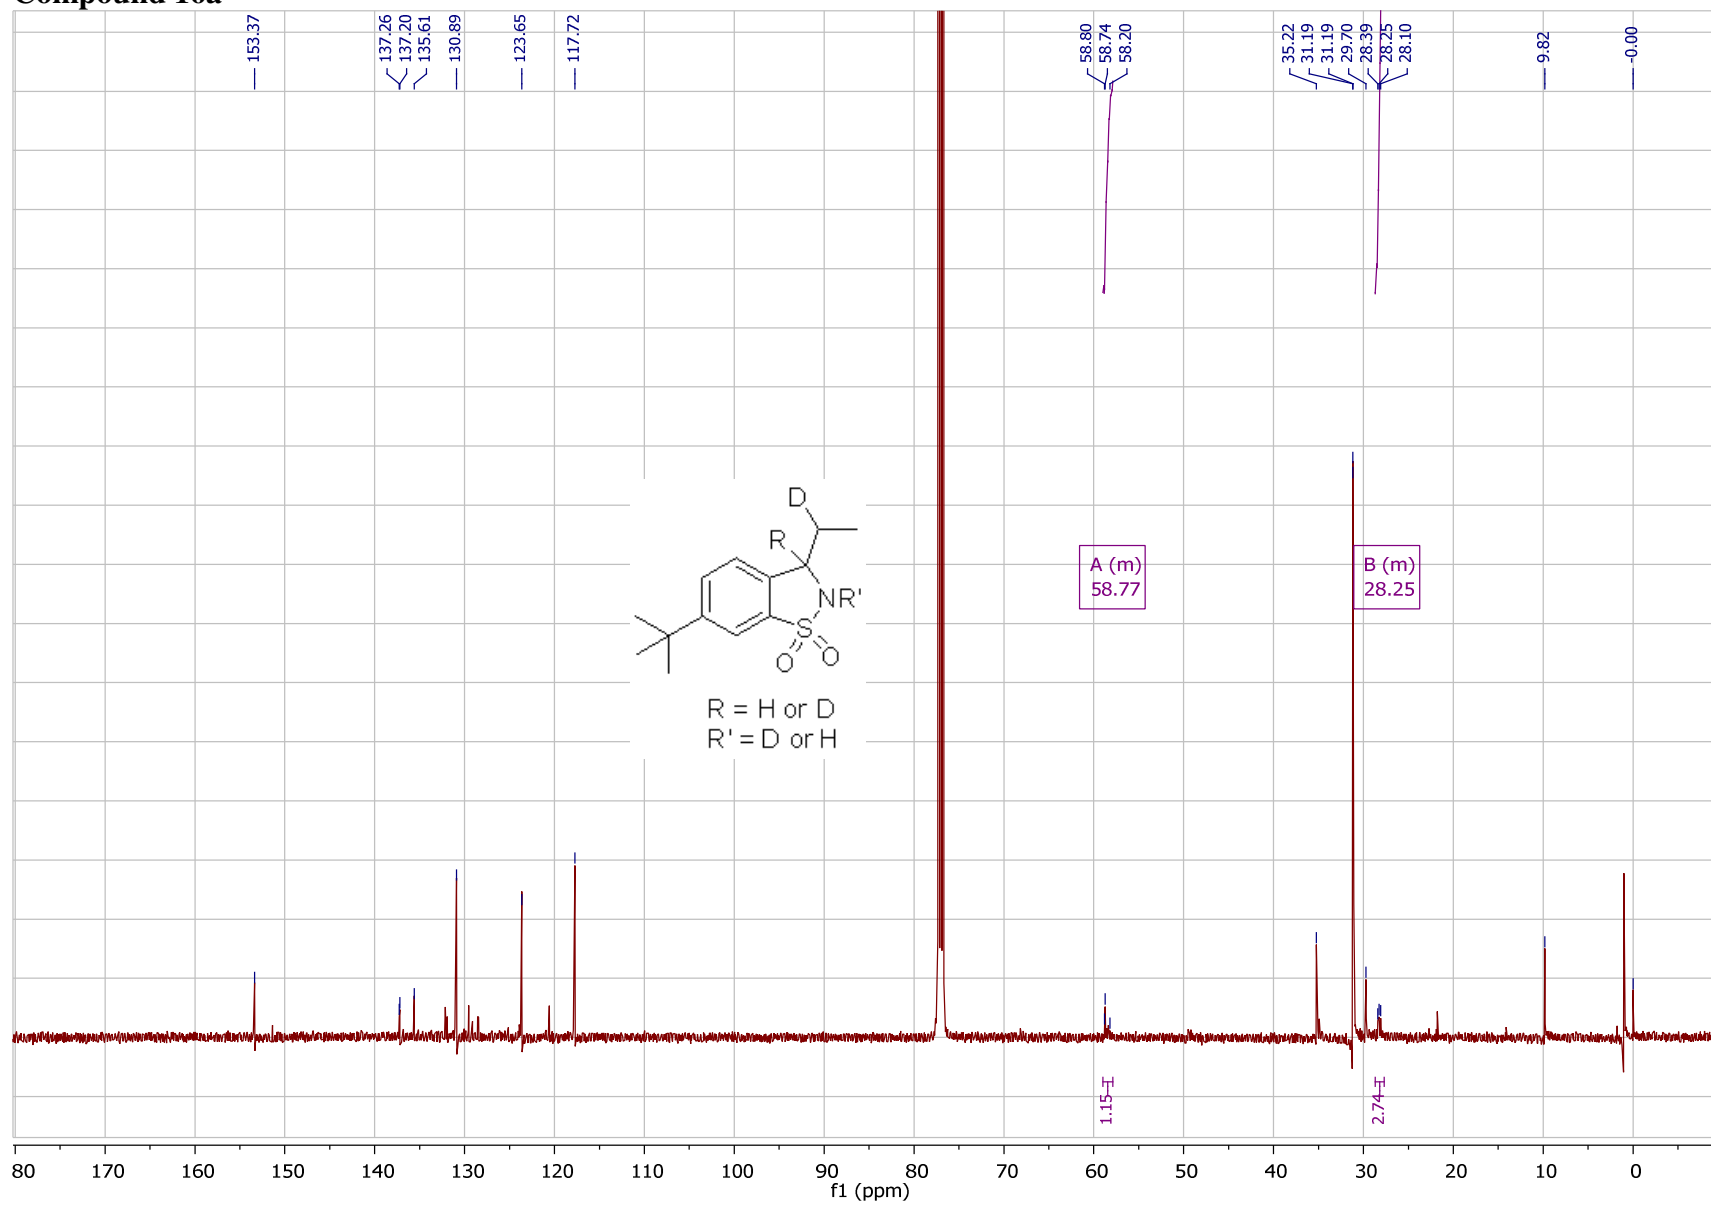

# Compound 16b

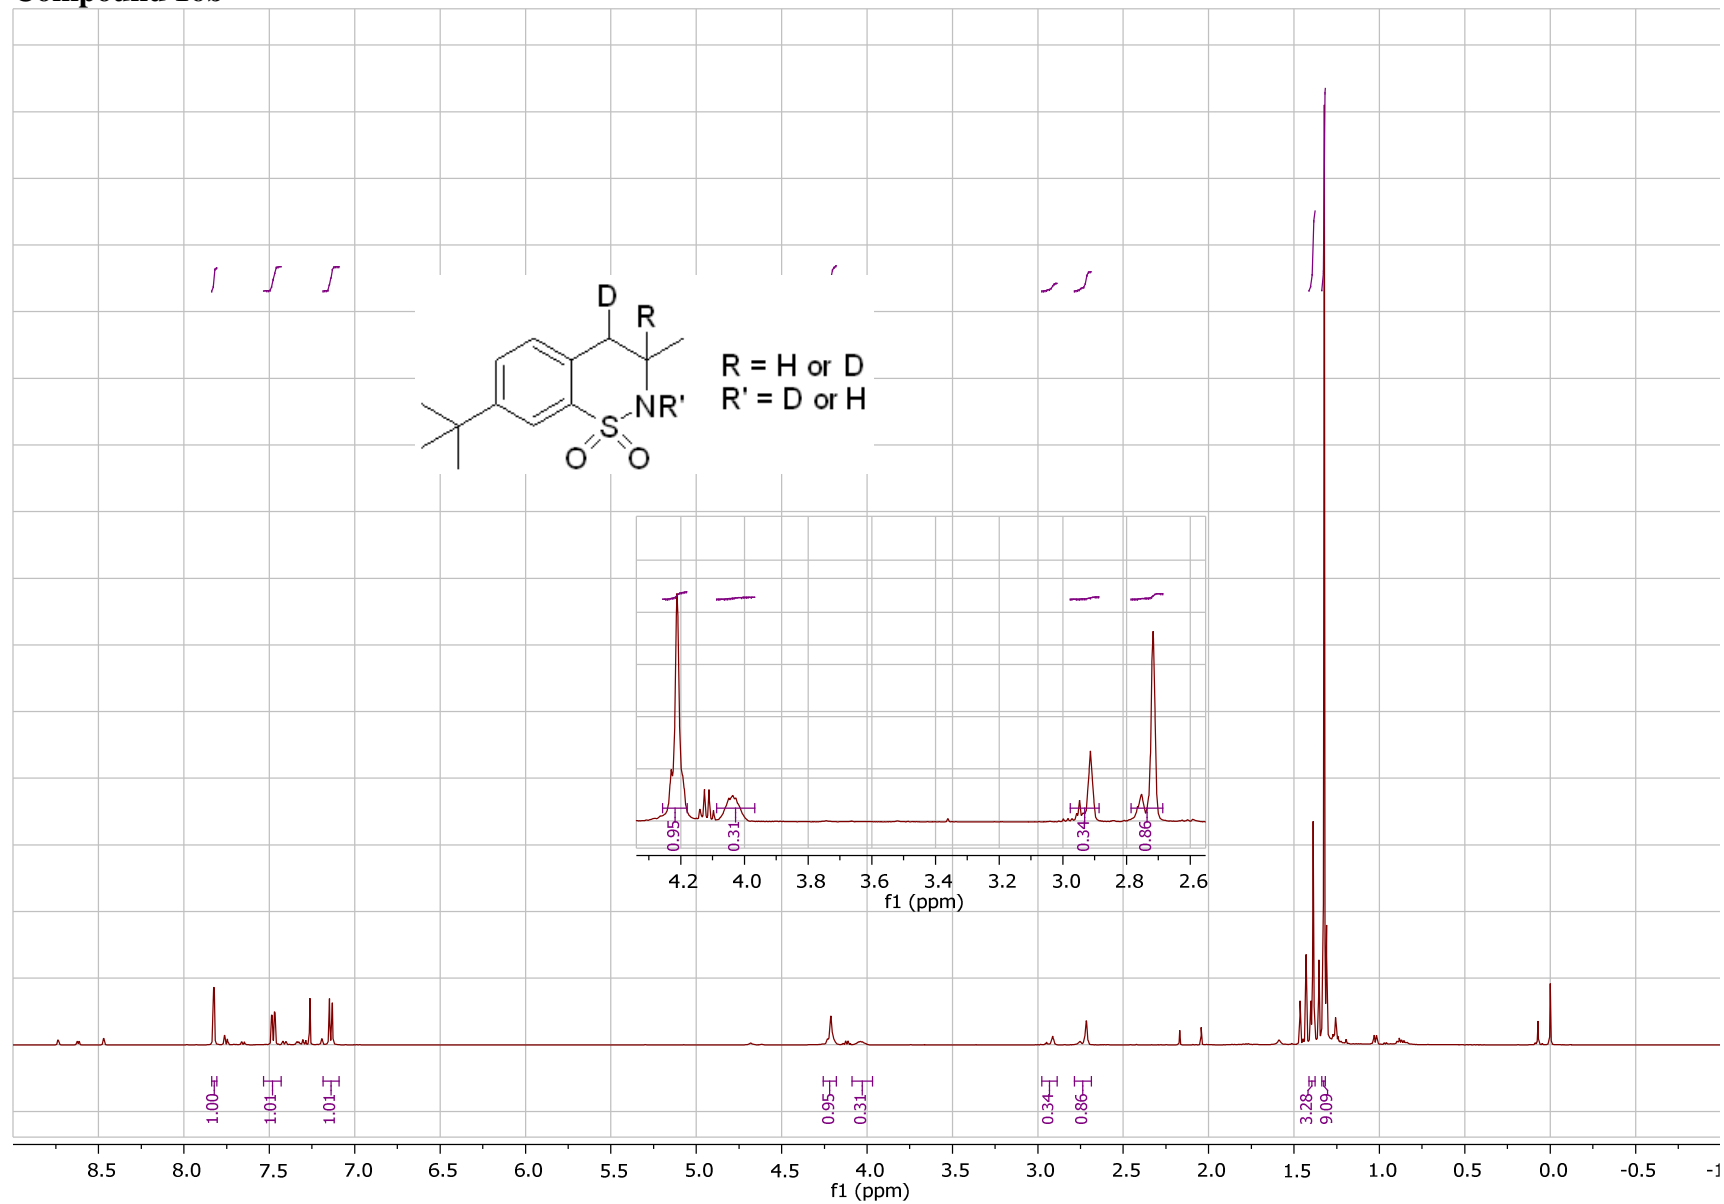

# Compound 16b

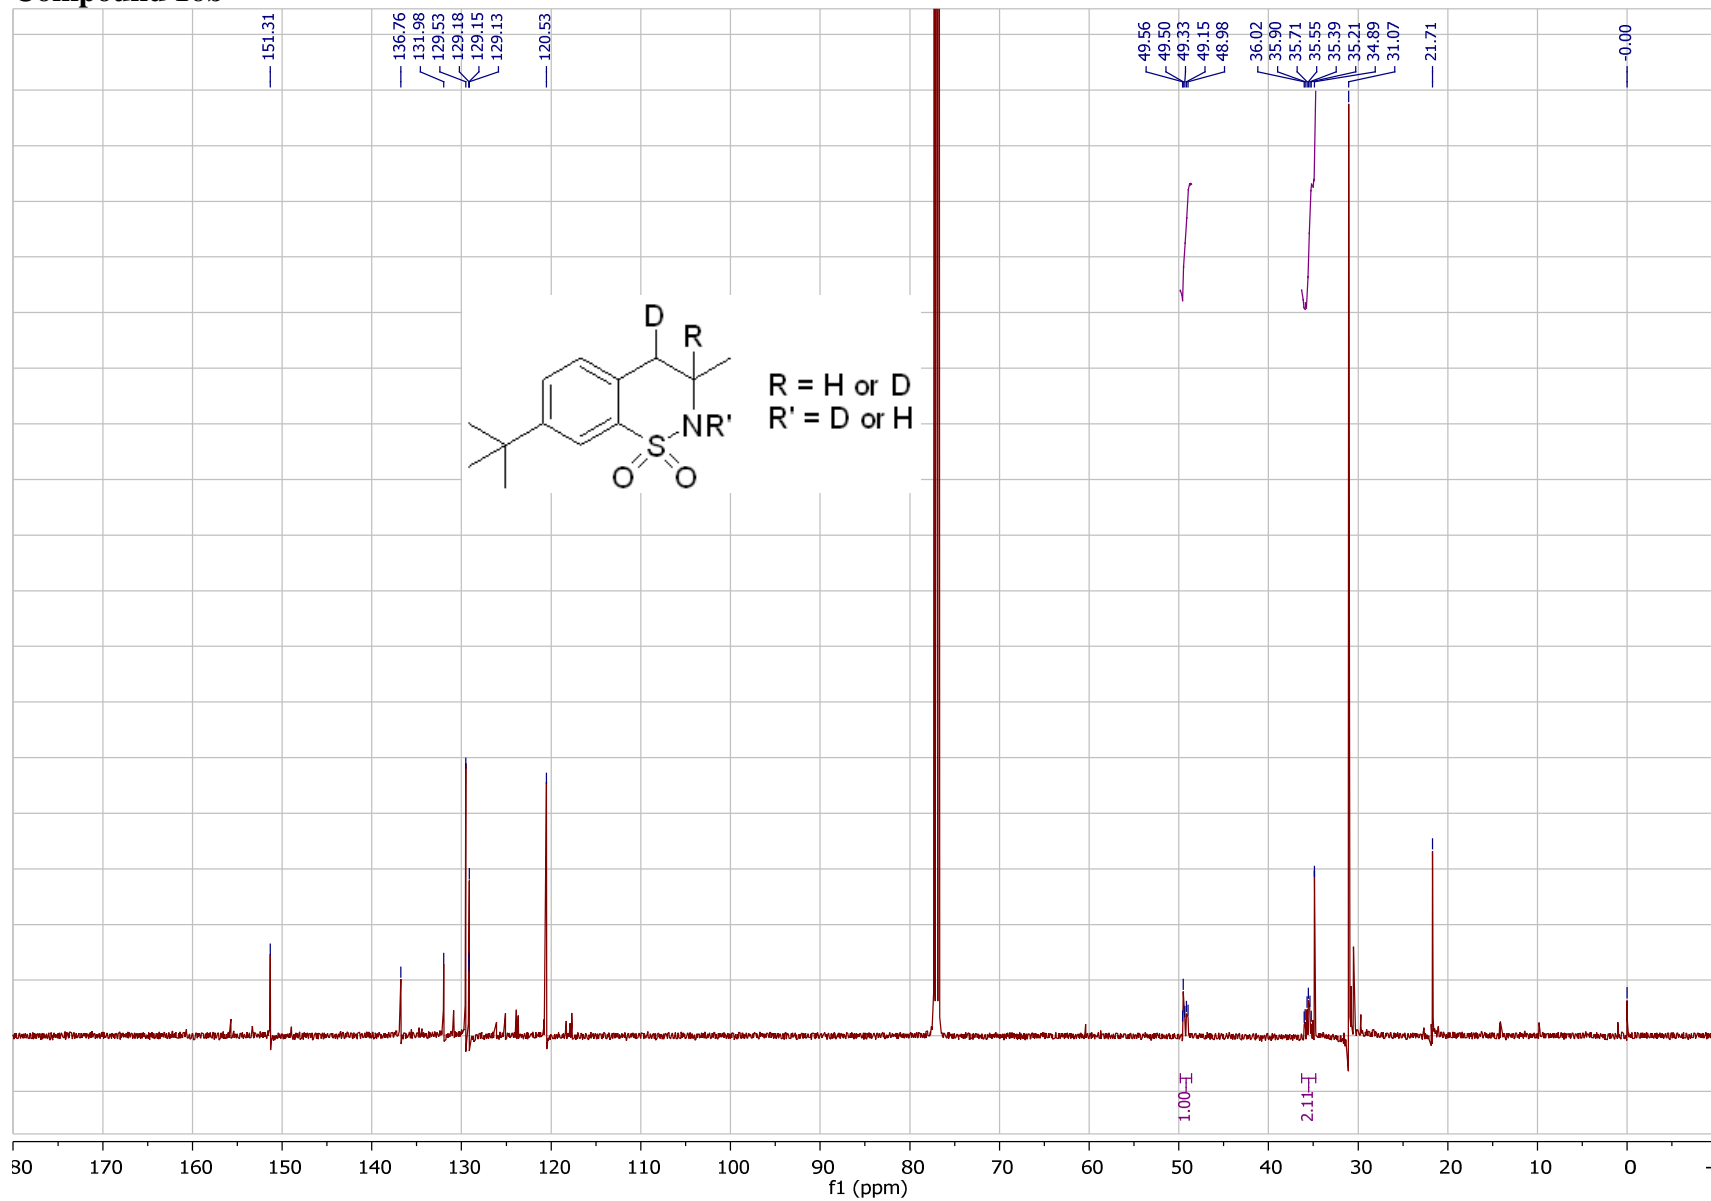

Supplement: c9cc04006d2.pdf [file c9cc04006d2.pdf]
